# Supplementary material
Source: MDPI journal article supplement (https://www.mdpi.com/2227-9717/10/1/107)
Supplement: s1 [file s1]

# Cmsolout r s32a

|             |                        |
|-------------|------------------------|
| Report date | Dec 4, 2021 7:39:23 PM |
|-------------|------------------------|

# Contents

|                                          |            |
|------------------------------------------|------------|
| <b>1. Global Definitions .....</b>       | <b>3</b>   |
| 1.1. Parameters .....                    | 3          |
| 1.2. Geometry Parts .....                | 5          |
| <b>2. Component 1 .....</b>              | <b>31</b>  |
| 2.1. Definitions .....                   | 31         |
| 2.2. Geometry 1 .....                    | 34         |
| 2.3. Materials .....                     | 38         |
| 2.4. Turbulent Flow, k- $\epsilon$ ..... | 43         |
| 2.5. Mesh 1 .....                        | 107        |
| <b>3. Study 1 .....</b>                  | <b>115</b> |
| 3.1. Sweep Geschwindigkeit .....         | 115        |
| 3.2. Sweep Mesh .....                    | 115        |
| 3.3. Frozen Rotor .....                  | 115        |
| 3.4. Solver Configurations .....         | 116        |
| <b>4. Results .....</b>                  | <b>136</b> |
| 4.1. Datasets .....                      | 136        |
| 4.2. Derived Values .....                | 137        |
| 4.3. Tables .....                        | 138        |
| 4.4. Plot Groups .....                   | 139        |

# 1 Global Definitions

|      |                          |
|------|--------------------------|
| Date | Feb 16, 2021 11:01:25 AM |
|------|--------------------------|

## GLOBAL SETTINGS

|             |                                                                       |
|-------------|-----------------------------------------------------------------------|
| Name        | Comsolout r s32a.mph                                                  |
| Path        | E:\CFD Jens Budde\Cluster\3Blatt+Rushton+Rushton\comsolout_r_s32a.mph |
| Version     | COMSOL Multiphysics 5.5 (Build: 359)                                  |
| Unit system | SI                                                                    |

## USED PRODUCTS

|                     |
|---------------------|
| COMSOL Multiphysics |
| CAD Import Module   |
| CFD Module          |

## 1.1 PARAMETERS

### PARAMETERS 1

| Name     | Expression | Value   | Description                        |
|----------|------------|---------|------------------------------------|
| D_u      | 3.5[cm]    | 0.035 m | unterer Kesseldurchmesser          |
| H        | 8.5 [cm]   | 0.085 m | Füllhöhe                           |
| r_R      | 1.4[cm]    | 0.014 m | Rührblattradius                    |
| H_ausb   | 0.7[cm]    | 0.007 m | Kesselausbuchtungshöhe             |
| R_ab     | 1[mm]      | 0.001 m | Abrundungsradius Kessel            |
| z_pO2    | 3.5[cm]    | 0.035 m | Position (z) der pO2-Sonde         |
| x_pO2    | 1.5[cm]    | 0.015 m | Position (x) der pO2-Sonde         |
| d_pO2    | 1.2 [cm]   | 0.012 m | Durchmesser pO2-Sonde              |
| z_Beg    | 1.5[cm]    | 0.015 m | Position (z) des Begasungsrings    |
| d_Beg    | 0.4[cm]    | 0.004 m | Durchmesser Begasungsring          |
| d_Ring   | 2.8[cm]    | 0.028 m | Innendurchmesser Begasungsring     |
| w_S      | 10.06      | 10.06   | Sondenneigung                      |
| d_S1     | 0.1[cm]    | 0.001 m | Durchmesser der Steigrohre         |
| slot_pO2 | 0          | 0       | Belegungsplatz der pO2-Sonde       |
| slot_S1  | 5          | 5       | Belegungsplatz Steigrohr 1         |
| slot_T   | 7          | 7       | Belegungsplatz der Temperatursonde |
| slot_pH  | 8          | 8       | Belegungsplatz der pH-Sonde        |
| slot_S2  | 9          | 9       | Belegungsplatz Steigrohr 2         |
| slot_Beg | 10         | 10      | Belegungsplatz Begasungsring       |
| slot_S3  | 11         | 11      | Belegungsplatz Steigrohr 3         |

| Name   | Expression                  | Value      | Description                      |
|--------|-----------------------------|------------|----------------------------------|
| z_pH   | 3.7[cm]                     | 0.037 m    | Position (z) der pH-Sonde        |
| x_pH   | 1.6[cm]                     | 0.016 m    | Position (x) der pH-Sonde        |
| z_T    | 4.9[cm]                     | 0.049 m    | Position (z) der Temperatursonde |
| x_T    | 2.0 [cm]                    | 0.02 m     | Position (x) der Temperatursonde |
| z_S1   | 0.2[cm]                     | 0.002 m    | Position (z) Steigrohr 1         |
| x_S1   | 1.7[cm]                     | 0.017 m    | Position (x) Steigrohr 1         |
| z_S2   | 3.6[cm]                     | 0.036 m    | Position (z) Steigrohr 2         |
| x_S2   | 1.4[cm]                     | 0.014 m    | Position (x) Steigrohr 2         |
| z_S3   | 10.4[cm]                    | 0.104 m    | Position (z) Steigrohr 3         |
| x_S3   | 3.1[cm]                     | 0.031 m    | Position (x) Steigrohr 3         |
| d_pH   | 1.2[cm]                     | 0.012 m    | Durchmesser pH-Sonde             |
| d_T    | 0.4[cm]                     | 0.004 m    | Durchmesser Temperatursonde      |
| pos_R  | 2.5[cm]                     | 0.025 m    | Rührerposition                   |
| d_Z    | 0.5[cm]                     | 0.005 m    | Schaftzylinderdurchmesser        |
| h_Z    | 0.5[cm]                     | 0.005 m    | Schaftzylinderhöhe               |
| h_K    | 0.15[cm]                    | 0.0015 m   | Schaftkegelhöhe                  |
| d_S    | 0.8[cm]                     | 0.008 m    | Schaftdurchmesser                |
| l_S    | $H - (h_K + h_Z/2 + pos_R)$ | 0.056 m    | Schaftlänge                      |
| f      | 200 [rpm]                   | 3.3333 1/s |                                  |
| TIME   | 0[s]                        | 0 s        |                                  |
| s_R    | 1[mm]                       | 0.001 m    | Rührblattstärke                  |
| w_R    | 30                          | 30         | Rührblattwinkel                  |
| h_E    | 0.65[cm]                    | 0.0065 m   | Ellipsoidhöhe (Halbachse)        |
| b_E    | 0.65[cm]                    | 0.0065 m   | Ellipsoidbreite                  |
| r_ab   | 1[mm]                       | 0.001 m    | Abrundungsradius                 |
| h_Z_1  | 0.55[cm]                    | 0.0055 m   | Schaftzylinderhöhe               |
| pos_R2 | 3 [cm]                      | 0.03 m     |                                  |
| pos_R3 | 4.5 [cm]                    | 0.045 m    |                                  |
| mf1    | 1E-4 [m]                    | 1E-4 m     |                                  |
| mf2    | 1E-5 [m]                    | 1E-5 m     |                                  |

## 1.2 GEOMETRY PARTS

### 1.2.1 Sonden

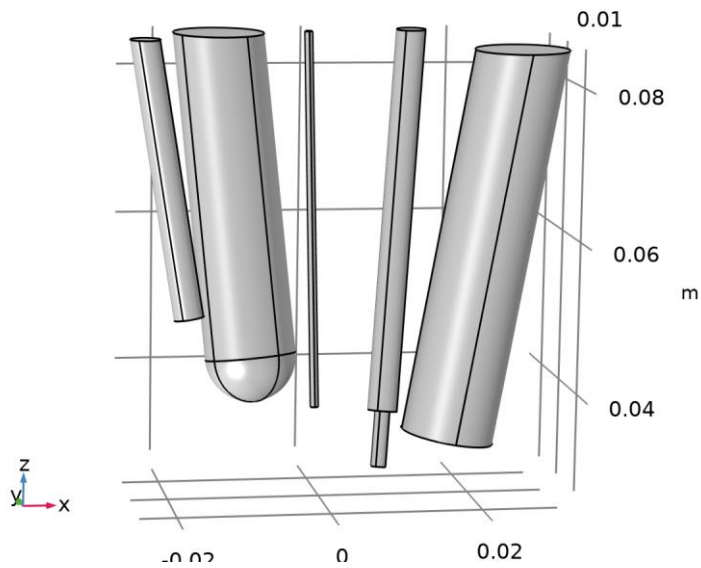

*Sonden*

#### UNITS

|              |     |
|--------------|-----|
| Length unit  | m   |
| Angular unit | deg |

#### GEOMETRY STATISTICS

| Description     | Value |
|-----------------|-------|
| Space dimension | 3     |

#### Zylinder 1 (cyl1)

##### POSITION

| Description | Value     |
|-------------|-----------|
| Position    | {0, 0, 0} |

##### AXIS

| Description | Value    |
|-------------|----------|
| Axis type   | z - axis |

##### SIZE AND SHAPE

| Description | Value   |
|-------------|---------|
| Radius      | d_pO2/2 |
| Height      | H       |

### Drehen 1 (rot1)

#### SETTINGS

| Description               | Value     |
|---------------------------|-----------|
| Point on axis of rotation | {0, 0, 0} |
| Axis type                 | y - axis  |
| Angle                     | 10.06     |

### Verschieben 1 (mov1)

#### SETTINGS

| Description | Value |
|-------------|-------|
| x           | 0.015 |
| y           | 0     |
| z           | 0.035 |

### Drehen 4 (rot2)

#### SETTINGS

| Description               | Value     |
|---------------------------|-----------|
| Point on axis of rotation | {0, 0, 0} |
| Axis type                 | z - axis  |
| Angle                     | 0         |

### Zylinder 2 (cyl2)

#### POSITION

| Description | Value     |
|-------------|-----------|
| Position    | {0, 0, H} |

#### AXIS

| Description | Value    |
|-------------|----------|
| Axis type   | z - axis |

#### SIZE AND SHAPE

| Description | Value |
|-------------|-------|
| Radius      | 1.3*H |
| Height      | 1.3*H |

### Zylinder 3 (cyl3)

#### POSITION

| Description | Value     |
|-------------|-----------|
| Position    | {0, 0, 0} |

#### AXIS

| Description | Value    |
|-------------|----------|
| Axis type   | z - axis |

#### SIZE AND SHAPE

| Description | Value  |
|-------------|--------|
| Radius      | d_S1/2 |
| Height      | H      |

### Drehen 2 (rot3)

#### SETTINGS

| Description               | Value     |
|---------------------------|-----------|
| Point on axis of rotation | {0, 0, 0} |
| Axis type                 | y - axis  |
| Angle                     | 10.06     |

### Verschieben 2 (mov2)

#### SETTINGS

| Description | Value |
|-------------|-------|
| x           | 0.017 |
| y           | 0     |
| z           | 0.002 |

### Drehen 3 (rot4)

#### SETTINGS

| Description               | Value     |
|---------------------------|-----------|
| Point on axis of rotation | {0, 0, 0} |
| Axis type                 | z - axis  |
| Angle                     | -150      |

### Zylinder 4 (cyl4)

#### POSITION

| Description | Value     |
|-------------|-----------|
| Position    | {0, 0, 0} |

#### AXIS

| Description | Value    |
|-------------|----------|
| Axis type   | z - axis |

#### SIZE AND SHAPE

| Description | Value   |
|-------------|---------|
| Radius      | $d_T/2$ |
| Height      | H       |

#### Drehen 5 (rot5)

##### SETTINGS

| Description               | Value     |
|---------------------------|-----------|
| Point on axis of rotation | {0, 0, 0} |
| Axis type                 | y - axis  |
| Angle                     | 10.06     |

#### Verschieben 3 (mov3)

##### SETTINGS

| Description | Value |
|-------------|-------|
| x           | 0.02  |
| y           | 0     |
| z           | 0.049 |

#### Drehen 6 (rot6)

##### SETTINGS

| Description               | Value     |
|---------------------------|-----------|
| Point on axis of rotation | {0, 0, 0} |
| Axis type                 | z - axis  |
| Angle                     | -210      |

#### Kugel 1 (sph1)

##### POSITION

| Description | Value               |
|-------------|---------------------|
| Position    | {0, 0, $d_{pH}/2$ } |

##### AXIS

| Description | Value    |
|-------------|----------|
| Axis type   | z - axis |

##### SIZE

| Description | Value      |
|-------------|------------|
| Radius      | $d_{pH}/2$ |



### Zylinder 5 (cyl5)

#### POSITION

| Description | Value          |
|-------------|----------------|
| Position    | {0, 0, d_pH/2} |

#### AXIS

| Description | Value    |
|-------------|----------|
| Axis type   | z - axis |

#### SIZE AND SHAPE

| Description | Value  |
|-------------|--------|
| Radius      | d_pH/2 |
| Height      | H      |

### Vereinigung 1 (uni1)

#### COMPOSE

| Description              | Value |
|--------------------------|-------|
| Keep interior boundaries | Off   |

### Drehen 7 (rot7)

#### SETTINGS

| Description               | Value     |
|---------------------------|-----------|
| Point on axis of rotation | {0, 0, 0} |
| Axis type                 | y - axis  |
| Angle                     | 10.06     |

### Verschieben 4 (mov4)

#### SETTINGS

| Description | Value                |
|-------------|----------------------|
| x           | 0.016                |
| y           | 0                    |
| z           | 0.037000000000000005 |

### Drehen 8 (rot8)

#### SETTINGS

| Description               | Value     |
|---------------------------|-----------|
| Point on axis of rotation | {0, 0, 0} |
| Axis type                 | z - axis  |
| Angle                     | -240      |

### Zylinder 6 (cyl6)

#### POSITION

| Description | Value     |
|-------------|-----------|
| Position    | {0, 0, 0} |

#### AXIS

| Description | Value    |
|-------------|----------|
| Axis type   | z - axis |

#### SIZE AND SHAPE

| Description | Value  |
|-------------|--------|
| Radius      | d_S1/2 |
| Height      | H      |

### Drehen 9 (rot9)

#### SETTINGS

| Description               | Value     |
|---------------------------|-----------|
| Point on axis of rotation | {0, 0, 0} |
| Axis type                 | y - axis  |
| Angle                     | 10.06     |

### Verschieben 5 (mov5)

#### SETTINGS

| Description | Value                |
|-------------|----------------------|
| x           | 0.013999999999999999 |
| y           | 0                    |
| z           | 0.036000000000000004 |

### Drehen 10 (rot10)

#### SETTINGS

| Description               | Value     |
|---------------------------|-----------|
| Point on axis of rotation | {0, 0, 0} |
| Axis type                 | z - axis  |
| Angle                     | -270      |

### Zylinder 7 (cyl7)

#### POSITION

| Description | Value     |
|-------------|-----------|
| Position    | {0, 0, 0} |

#### AXIS

| Description | Value    |
|-------------|----------|
| Axis type   | z - axis |

#### SIZE AND SHAPE

| Description | Value  |
|-------------|--------|
| Radius      | d_S1/2 |
| Height      | H      |

### Drehen 11 (rot11)

#### SETTINGS

| Description               | Value     |
|---------------------------|-----------|
| Point on axis of rotation | {0, 0, 0} |
| Axis type                 | y - axis  |
| Angle                     | 10.06     |

### Verschieben 6 (mov6)

#### SETTINGS

| Description | Value                |
|-------------|----------------------|
| x           | 0.031000000000000003 |
| y           | 0                    |
| z           | 0.104000000000000001 |

### Drehen 12 (rot12)

#### SETTINGS

| Description               | Value     |
|---------------------------|-----------|
| Point on axis of rotation | {0, 0, 0} |
| Axis type                 | z - axis  |
| Angle                     | -330      |

### Arbeitsebene 1 (wp1)

#### PLANE DEFINITION

| Description | Value      |
|-------------|------------|
| Plane       | xz - plane |

#### UNITE OBJECTS

| Description   | Value |
|---------------|-------|
| Unite objects | On    |

## Ebene Geometrie (sequence2D)

### Kreis 1 (c1)

#### POSITION

| Description | Value                       |
|-------------|-----------------------------|
| Position    | {d_Ring/2 + d_Beg/2, z_Beg} |

#### SIZE AND SHAPE

| Description | Value   |
|-------------|---------|
| Radius      | d_Beg/2 |

### Rotiert extrudieren 1 (rev1)

#### SETTINGS

| Description | Value                          |
|-------------|--------------------------------|
| Work plane  | <a href="#">Arbeitsebene 1</a> |

#### REVOLUTION ANGLES

| Description | Value     |
|-------------|-----------|
| Angles      | {0, 2*pi} |
| Start angle | 20        |

#### REVOLUTION AXIS

| Description                  | Value            |
|------------------------------|------------------|
| Point on the revolution axis | {0, 0}           |
| Direction of revolution axis | {0, 1}           |
| Revolution axis              | {{0, 0}, {0, 1}} |

### Begasungsrohr (cyl8)

#### POSITION

| Description | Value         |
|-------------|---------------|
| Position    | {0, 0, 2[cm]} |

#### AXIS

| Description | Value    |
|-------------|----------|
| Axis type   | z - axis |

#### SIZE AND SHAPE

| Description | Value     |
|-------------|-----------|
| Radius      | d_Beg/2   |
| Height      | H - 2[cm] |

### Cylinder 9 (cyl9)

#### POSITION

| Description | Value            |
|-------------|------------------|
| Position    | {0, 0, 1.25[cm]} |

#### AXIS

| Description | Value    |
|-------------|----------|
| Axis type   | z - axis |

#### SIZE AND SHAPE

| Description | Value    |
|-------------|----------|
| Radius      | d_Beg/4  |
| Height      | 0.75[cm] |

### Vereinigung 2 (uni2)

#### COMPOSE

| Description              | Value |
|--------------------------|-------|
| Keep interior boundaries | Off   |

### Drehen 13 (rot13)

#### SETTINGS

| Description               | Value     |
|---------------------------|-----------|
| Point on axis of rotation | {0, 0, 0} |
| Axis type                 | y - axis  |
| Angle                     | 10.06     |

### Verschieben 7 (mov7)

#### SETTINGS

| Description | Value |
|-------------|-------|
| x           | 0.016 |
| y           | 0     |
| z           | 0.015 |

### Kugel 2 (sph2)

#### POSITION

| Description | Value                          |
|-------------|--------------------------------|
| Position    | {d_Ring/2 + d_Beg/2, 0, z_Beg} |

#### AXIS

| Description | Value    |
|-------------|----------|
| Axis type   | z - axis |

#### SIZE

| Description | Value   |
|-------------|---------|
| Radius      | d_Beg/2 |

### Drehen 14 (rot14)

#### SETTINGS

| Description               | Value     |
|---------------------------|-----------|
| Point on axis of rotation | {0, 0, 0} |
| Axis type                 | z - axis  |
| Angle                     | -300      |

### 1.2.2 Reaktorkessel

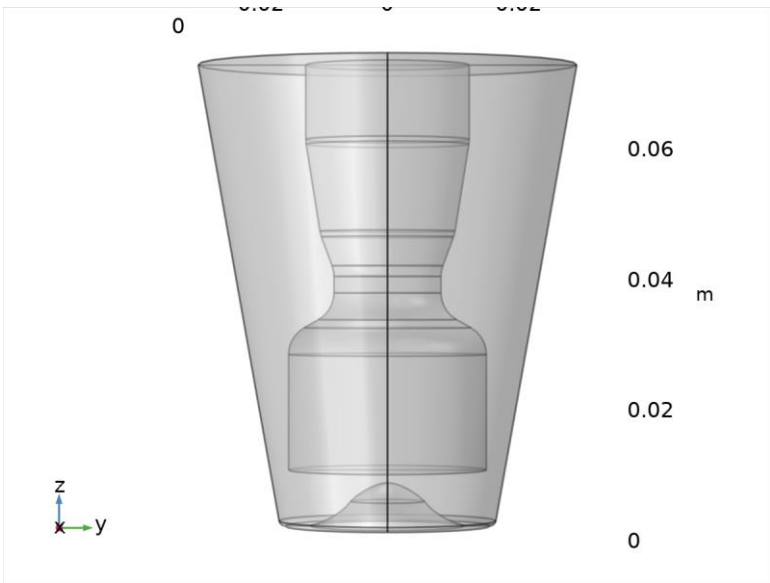

*Reaktorkessel*

#### UNITS

|              |     |
|--------------|-----|
| Length unit  | m   |
| Angular unit | deg |

#### GEOMETRY STATISTICS

| Description     | Value |
|-----------------|-------|
| Space dimension | 3     |

## Arbeitsebene 1 (wp1)

### PLANE DEFINITION

| Description | Value      |
|-------------|------------|
| Plane       | xz - plane |

### UNITE OBJECTS

| Description   | Value |
|---------------|-------|
| Unite objects | On    |

## Ebene Geometrie (sequence2D)

### Bézier Polygon 1 (b1)

#### POLYGON SEGMENTS

| Description    | Value                                                             |
|----------------|-------------------------------------------------------------------|
| Control points | {{-D_u/2, 0, 0, -(3.5[cm] + 0.355*H)/2, -D_u/2}, {0, 0, H, H, 0}} |
| Degree         | {1, 1, 1, 1}                                                      |
| Weights        | {1, 1, 1, 1, 1, 1, 1, 1}                                          |
| Type           | Solid                                                             |

### Bézier Polygon 5 (b5)

#### POLYGON SEGMENTS

| Description    | Value                                                                                                                 |
|----------------|-----------------------------------------------------------------------------------------------------------------------|
| Control points | {{-0.0125, -0.008, -0.006, -0.003, 0, 0, 0, 0, -0.0125, -0.0125}, {0, 0.001, 0.004, 0.007, 0.007, 0.007, 0, 0, 0, 0}} |
| Degree         | {2, 2, 2, 2, 1}                                                                                                       |
| Weights        | {1, 0.7071067811865475, 1, 1, 0.7071067811865475, 1, 1, 0.7071067811865475, 1, 1, 0.7071067811865475, 1, 1, 1}        |
| Type           | Solid                                                                                                                 |

### Abrundung 1 (fil1)

#### SETTINGS

| Description | Value |
|-------------|-------|
| Radius      | R_ab  |

## Rotiert extrudieren 1 (rev1)

#### SETTINGS

| Description | Value                          |
|-------------|--------------------------------|
| Work plane  | <a href="#">Arbeitsebene 1</a> |

#### REVOLUTION ANGLES

| Description | Value |
|-------------|-------|
|-------------|-------|

| Description           | Value           |
|-----------------------|-----------------|
| Angles                | {0, 2*pi}       |
| Type of specification | Full revolution |
| Keep original faces   | Off             |

#### REVOLUTION AXIS

| Description                  | Value            |
|------------------------------|------------------|
| Point on the revolution axis | {0, 0}           |
| Direction of revolution axis | {0, 1}           |
| Revolution axis              | {{0, 0}, {0, 1}} |

### Zylinder 1 (cyl1)

#### POSITION

| Description | Value          |
|-------------|----------------|
| Position    | {0, 0, H_ausb} |

#### AXIS

| Description | Value    |
|-------------|----------|
| Axis type   | z - axis |

#### SIZE AND SHAPE

| Description | Value      |
|-------------|------------|
| Radius      | 1.1*r_R    |
| Height      | H - H_ausb |

### Arbeitsebene 2 (wp2)

#### PLANE DEFINITION

| Description | Value      |
|-------------|------------|
| Plane       | xz - plane |

#### UNITE OBJECTS

| Description   | Value |
|---------------|-------|
| Unite objects | On    |

### Ebene Geometrie (sequence2D)

#### Polygon 1 (pol1)

#### OBJECT TYPE

| Description | Value |
|-------------|-------|
| Type        | Solid |



## COORDINATES

| Description | Value |
|-------------|-------|
| Data source | Table |

## COORDINATES

| xw (m)                                         | yw (m)                                            |
|------------------------------------------------|---------------------------------------------------|
| 0                                              | $1.3 \cdot H_{\text{ausb}}$                       |
| $1.15 \cdot r_R$                               | $1.3 \cdot H_{\text{ausb}}$                       |
| $1.15 \cdot r_R$                               | $0.88 \cdot z_{\text{pO2}}$                       |
| $x_{\text{pO2}} - 1.05 \cdot d_{\text{pO2}}/2$ | $1 \cdot z_{\text{pO2}}$                          |
| $x_{\text{pO2}} - 1.05 \cdot d_{\text{pO2}}/2$ | $\text{pos}_R + \text{pos}_{R2} - 0.0025 - 0.011$ |
| $0.78 \cdot r_R$                               | $\text{pos}_R + \text{pos}_{R2} - 0.0025 - 0.005$ |
| $0.95 \cdot r_R$                               | $\text{pos}_R + \text{pos}_{R2} - 0.0025 + 0.01$  |
| $0.95 \cdot r_R$                               | H                                                 |
| 0                                              | H                                                 |

### Abrundung 1 (fil1)

## SETTINGS

| Description | Value |
|-------------|-------|
| Radius      | 0.005 |

### Rotiert extrudieren 2 (rev2)

## SETTINGS

| Description | Value                          |
|-------------|--------------------------------|
| Work plane  | <a href="#">Arbeitsebene 2</a> |

## REVOLUTION ANGLES

| Description           | Value                |
|-----------------------|----------------------|
| Angles                | $\{0, 2 \cdot \pi\}$ |
| Type of specification | Full revolution      |
| Keep original faces   | Off                  |

## REVOLUTION AXIS

| Description                  | Value                    |
|------------------------------|--------------------------|
| Point on the revolution axis | $\{0, 0\}$               |
| Direction of revolution axis | $\{0, 1\}$               |
| Revolution axis              | $\{\{0, 0\}, \{0, 1\}\}$ |

### 1.2.3 Rührer

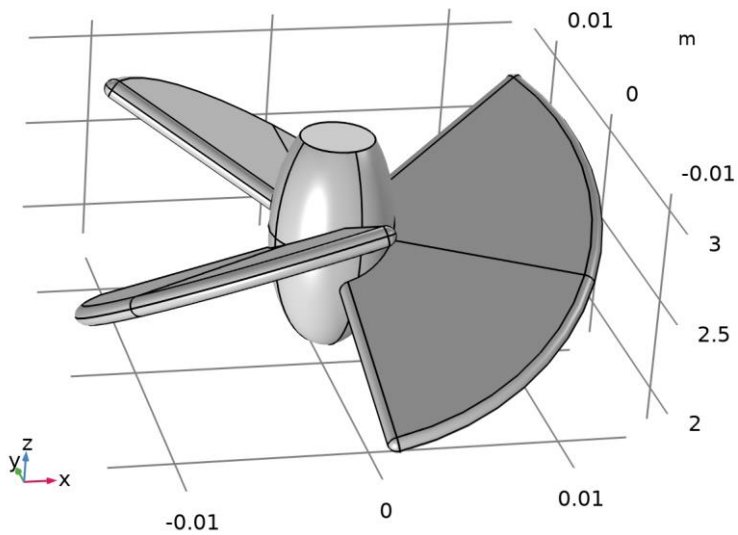

*Rührer*

#### UNITS

|              |     |
|--------------|-----|
| Length unit  | m   |
| Angular unit | deg |

#### GEOMETRY STATISTICS

| Description     | Value |
|-----------------|-------|
| Space dimension | 3     |

#### Arbeitsebene 1 (wp1)

##### UNITE OBJECTS

| Description   | Value |
|---------------|-------|
| Unite objects | On    |

#### Ebene Geometrie (sequence2D)

##### Kreis 1 (c1)

##### POSITION

| Description | Value  |
|-------------|--------|
| Position    | {0, 0} |

##### SIZE AND SHAPE

| Description | Value |
|-------------|-------|
| Radius      | r_R   |

#### Rechteck 1 (r1)

##### POSITION

| Description | Value  |
|-------------|--------|
| Position    | {0, 0} |

##### ROTATION ANGLE

| Description | Value |
|-------------|-------|
| Rotation    | 60    |

##### SIZE

| Description | Value |
|-------------|-------|
| Width       | r_R   |
| Height      | r_R   |

#### Rechteck 2 (r2)

##### POSITION

| Description | Value  |
|-------------|--------|
| Position    | {0, 0} |

##### ROTATION ANGLE

| Description | Value |
|-------------|-------|
| Rotation    | 30    |

##### SIZE

| Description | Value |
|-------------|-------|
| Width       | r_R   |
| Height      | r_R   |

#### Abrundung 1 (fil1)

##### SETTINGS

| Description | Value |
|-------------|-------|
| Radius      | r_ab  |

#### Arbeitsebene 2 (wp2)

##### UNITE OBJECTS

| Description   | Value |
|---------------|-------|
| Unite objects | On    |

## Ebene Geometrie (sequence2D)

### Rechteck 1 (r1)

#### POSITION

| Description | Value  |
|-------------|--------|
| Position    | {0, 0} |

#### SIZE

| Description | Value |
|-------------|-------|
| Width       | s_R/2 |
| Height      | r_R   |

### Abrundung 1 (fil1)

#### SETTINGS

| Description | Value |
|-------------|-------|
| Radius      | s_R/2 |

### Rotiert extrudieren 1 (rev1)

#### SETTINGS

| Description | Value                          |
|-------------|--------------------------------|
| Work plane  | <a href="#">Arbeitsebene 2</a> |

#### REVOLUTION ANGLES

| Description | Value     |
|-------------|-----------|
| Angles      | {0, 2*pi} |
| Start angle | -90       |
| End angle   | 90        |

#### REVOLUTION AXIS

| Description                  | Value            |
|------------------------------|------------------|
| Point on the revolution axis | {0, 0}           |
| Direction of revolution axis | {0, 1}           |
| Revolution axis              | {{0, 0}, {0, 1}} |

### Arbeitsebene 3 (wp3)

#### PLANE DEFINITION

| Description | Value      |
|-------------|------------|
| Plane       | zy - plane |

#### UNITE OBJECTS

| Description | Value |
|-------------|-------|
|-------------|-------|

| Description   | Value |
|---------------|-------|
| Unite objects | On    |

## Ebene Geometrie (sequence2D)

### Rechteck 1 (r1)

#### POSITION

| Description | Value              |
|-------------|--------------------|
| Position    | {pos_R - s_R/2, 0} |

#### SIZE

| Description | Value |
|-------------|-------|
| Width       | s_R   |
| Height      | r_R   |

### Abrundung 1 (fil1)

#### SETTINGS

| Description | Value |
|-------------|-------|
| Radius      | s_R/2 |

### Rotiert extrudieren 2 (rev2)

#### SETTINGS

| Description | Value                          |
|-------------|--------------------------------|
| Work plane  | <a href="#">Arbeitsebene 3</a> |

#### REVOLUTION ANGLES

| Description | Value     |
|-------------|-----------|
| Angles      | {0, 2*pi} |
| End angle   | 120       |

#### REVOLUTION AXIS

| Description                  | Value            |
|------------------------------|------------------|
| Axis type                    | 3D               |
| Point on the revolution axis | {0, 0, 0}        |
| Direction of revolution axis | {0, 0, 1}        |
| Revolution axis              | {{0, 0}, {0, 1}} |

### Kopieren 3 (copy3)

#### SETTINGS

| Description | Value |
|-------------|-------|
|-------------|-------|

| Description        | Value |
|--------------------|-------|
| Keep input objects | On    |
| x                  | 0     |
| y                  | 0     |
| z                  | 0     |

#### Drehen 4 (rot4)

##### SETTINGS

| Description               | Value         |
|---------------------------|---------------|
| Point on axis of rotation | {0, 0, pos_R} |
| Axis type                 | y - axis      |
| Angle                     | 180           |

#### Drehen 5 (rot5)

##### SETTINGS

| Description               | Value     |
|---------------------------|-----------|
| Point on axis of rotation | {0, 0, 0} |
| Axis type                 | z - axis  |
| Angle                     | 120       |

#### Vereinigung 2 (uni2)

##### COMPOSE

| Description              | Value |
|--------------------------|-------|
| Keep interior boundaries | Off   |

#### Verschieben 1 (mov1)

##### SETTINGS

| Description | Value   |
|-------------|---------|
| x           | 0       |
| y           | 0       |
| z           | -5.0E-4 |

#### Drehen 6 (rot6)

##### SETTINGS

| Description               | Value     |
|---------------------------|-----------|
| Point on axis of rotation | {0, 0, 0} |
| Axis type                 | z - axis  |
| Angle                     | -60       |

### Drehen 1 (rot1)

#### SETTINGS

| Description               | Value         |
|---------------------------|---------------|
| Point on axis of rotation | {0, 0, pos_R} |
| Axis type                 | y - axis      |
| Angle                     | 30            |

### Kopieren 1 (copy1)

#### SETTINGS

| Description        | Value |
|--------------------|-------|
| Keep input objects | On    |
| x                  | 0     |
| y                  | 0     |
| z                  | 0     |

### Drehen 2 (rot2)

#### SETTINGS

| Description               | Value         |
|---------------------------|---------------|
| Point on axis of rotation | {0, 0, pos_R} |
| Axis type                 | z - axis      |
| Angle                     | 120           |

### Kopieren 2 (copy2)

#### SETTINGS

| Description        | Value |
|--------------------|-------|
| Keep input objects | On    |
| x                  | 0     |
| y                  | 0     |
| z                  | 0     |

### Drehen 3 (rot3)

#### SETTINGS

| Description               | Value     |
|---------------------------|-----------|
| Point on axis of rotation | {0, 0, 0} |
| Axis type                 | z - axis  |
| Angle                     | 240       |

### Ellipsoid 1 (elp1)

#### POSITION

| Description | Value         |
|-------------|---------------|
| Position    | {0, 0, pos_R} |

#### ROTATION ANGLE

| Description | Value |
|-------------|-------|
| Rotation    | 14    |

#### AXIS

| Description | Value    |
|-------------|----------|
| Axis type   | z - axis |

#### SIZE

| Description | Value |
|-------------|-------|
| a-semiaxis  | b_E/2 |
| b-semiaxis  | b_E/2 |
| c-semiaxis  | h_E   |

### Quader 1 (blk1)

#### POSITION

| Description | Value                             |
|-------------|-----------------------------------|
| Position    | {-b_E/2, -b_E/2, pos_R + 4/5*h_E} |

#### AXIS

| Description | Value    |
|-------------|----------|
| Axis type   | z - axis |

#### SIZE AND SHAPE

| Description | Value |
|-------------|-------|
| Width       | b_E   |
| Depth       | b_E   |
| Height      | h_E   |

### Vereinigung 1 (uni1)

#### SELECTIONS OF RESULTING ENTITIES

| Description                 | Value |
|-----------------------------|-------|
| Resulting objects selection | On    |

#### COMPOSE



| Description              | Value |
|--------------------------|-------|
| Keep interior boundaries | Off   |

## 1.2.4 Rührerschaft

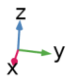

*Rührerschaft*

### UNITS

|              |     |
|--------------|-----|
| Length unit  | m   |
| Angular unit | deg |

### GEOMETRY STATISTICS

| Description     | Value |
|-----------------|-------|
| Space dimension | 3     |

## Zylinder 1 (cyl1)

### POSITION

| Description | Value                   |
|-------------|-------------------------|
| Position    | {0, 0, pos_R + 4/5*h_E} |

### AXIS

| Description | Value    |
|-------------|----------|
| Axis type   | z - axis |

### SIZE AND SHAPE

| Description | Value |
|-------------|-------|
| Radius      | d_Z/2 |

| Description | Value |
|-------------|-------|
| Height      | $h_Z$ |

### Exzentrischer Kegel 1 (econ1)

#### POSITION

| Description | Value                                          |
|-------------|------------------------------------------------|
| Position    | $\{0, 0, \text{pos}_R + 4/5 \cdot h_E + h_Z\}$ |

#### AXIS

| Description | Value    |
|-------------|----------|
| Axis type   | z - axis |

#### SIZE AND SHAPE

| Description      | Value      |
|------------------|------------|
| a-semiaxis       | $d_Z/2$    |
| b-semiaxis       | $d_Z/2$    |
| Height           | $h_K$      |
| Ratio            | $d_S/d_Z$  |
| Top displacement | $\{0, 0\}$ |

### Zylinder 2 (cyl2)

#### POSITION

| Description | Value                                                |
|-------------|------------------------------------------------------|
| Position    | $\{0, 0, \text{pos}_R + 4/5 \cdot h_E + h_Z + h_K\}$ |

#### AXIS

| Description | Value    |
|-------------|----------|
| Axis type   | z - axis |

#### SIZE AND SHAPE

| Description | Value                                            |
|-------------|--------------------------------------------------|
| Radius      | $d_S/2$                                          |
| Height      | $H - (\text{pos}_R + 4/5 \cdot h_E + h_Z + h_K)$ |

### Quader 1 (blk1)

#### POSITION

| Description | Value                                                                           |
|-------------|---------------------------------------------------------------------------------|
| Position    | $\{-0.005, 0.0035, \text{pos}_R + 4/5 \cdot h_E + h_Z + h_K + 0.5[\text{cm}]\}$ |

#### AXIS

| Description | Value    |
|-------------|----------|
| Axis type   | z - axis |

#### SIZE AND SHAPE

| Description | Value |
|-------------|-------|
| Width       | 0.01  |
| Depth       | 0.01  |
| Height      | 0.004 |

### Quader 2 (blk2)

#### POSITION

| Description | Value                                                  |
|-------------|--------------------------------------------------------|
| Position    | {-0.005, -0.0135, pos_R + 4/5*h_E+h_Z + h_K + 0.5[cm]} |

#### AXIS

| Description | Value    |
|-------------|----------|
| Axis type   | z - axis |

#### SIZE AND SHAPE

| Description | Value |
|-------------|-------|
| Width       | 0.01  |
| Depth       | 0.01  |
| Height      | 0.004 |

### Vereinigung 1 (uni1)

#### COMPOSE

| Description              | Value |
|--------------------------|-------|
| Keep interior boundaries | Off   |

## 1.2.5 Rushton

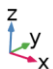

*Rushton*

### UNITS

|              |     |
|--------------|-----|
| Length unit  | mm  |
| Angular unit | deg |

### GEOMETRY STATISTICS

| Description     | Value |
|-----------------|-------|
| Space dimension | 3     |

## Work Plane 1 (wp1)

### UNITE OBJECTS

| Description   | Value |
|---------------|-------|
| Unite objects | On    |

## Plane Geometry (sequence2D)

### Circle 1 (c1)

#### POSITION

| Description | Value  |
|-------------|--------|
| Position    | {0, 0} |

#### SIZE AND SHAPE

| Description | Value |
|-------------|-------|
| Radius      | d_S/2 |

#### Circle 2 (c2)

##### POSITION

| Description | Value  |
|-------------|--------|
| Position    | {0, 0} |

##### SIZE AND SHAPE

| Description | Value |
|-------------|-------|
| Radius      | 6     |

#### Rectangle 1 (r1)

##### POSITION

| Description | Value     |
|-------------|-----------|
| Position    | {4.5, -1} |

##### SIZE

| Description | Value |
|-------------|-------|
| Width       | 7     |
| Height      | 2     |

#### Rotate 1 (rot1)

##### SETTINGS

| Description               | Value                       |
|---------------------------|-----------------------------|
| Angle                     | {0, 60, 120, 180, 240, 300} |
| Point on axis of rotation | {0, 0}                      |

#### Union 1 (uni1)

##### COMPOSE

| Description              | Value |
|--------------------------|-------|
| Keep interior boundaries | Off   |

#### Fillet 1 (fil1)

##### SETTINGS

| Description | Value |
|-------------|-------|
| Radius      | 1     |

#### Extrude 1 (ext1)

##### SETTINGS

| Description | Value                        |
|-------------|------------------------------|
| Work plane  | <a href="#">Work Plane 1</a> |

#### DISTANCES

| Distances (mm) |
|----------------|
| 5              |

#### SCALES

| Scales xw | Scales yw |
|-----------|-----------|
| 1         | 1         |

#### DISPLACEMENTS

| Displacements xw (mm) | Displacements yw (mm) |
|-----------------------|-----------------------|
| 0                     | 0                     |

#### TWIST ANGLES

| Twist angles (deg) |
|--------------------|
| 0                  |

## 2 Component 1

|      |                         |
|------|-------------------------|
| Date | Nov 16, 2020 9:12:43 AM |
|------|-------------------------|

### SETTINGS

| Description          | Value                 |
|----------------------|-----------------------|
| Unit system          | Same as global system |
| Geometry shape order | Automatic             |

### SPATIAL FRAME COORDINATES

| First | Second | Third |
|-------|--------|-------|
| x     | y      | z     |

### MATERIAL FRAME COORDINATES

| First | Second | Third |
|-------|--------|-------|
| X     | Y      | Z     |

### GEOMETRY FRAME COORDINATES

| First | Second | Third |
|-------|--------|-------|
| Xg    | Yg     | Zg    |

### MESH FRAME COORDINATES

| First | Second | Third |
|-------|--------|-------|
| Xm    | Ym     | Zm    |

## 2.1 DEFINITIONS

### 2.1.1 Pairs

#### Identity Boundary Pair 7

|           |               |
|-----------|---------------|
| Pair type | Identity pair |
| Pair name | ap7           |

### SOURCE SELECTION

|                        |                                         |
|------------------------|-----------------------------------------|
| Geometric entity level | Boundary                                |
| Selection              | Geometry geom1: Dimension 2: Boundary 2 |

### DESTINATION SELECTION

|                        |                                          |
|------------------------|------------------------------------------|
| Geometric entity level | Boundary                                 |
| Selection              | Geometry geom1: Dimension 2: Boundary 40 |

### SETTINGS

| Name                    | Value |
|-------------------------|-------|
| Search method           | fast  |
| Extrapolation tolerance | 1e-4  |

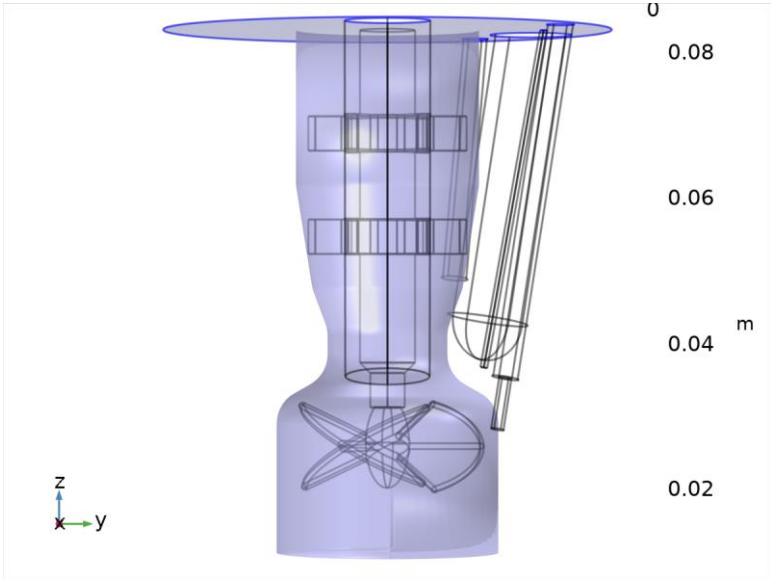

Source selection

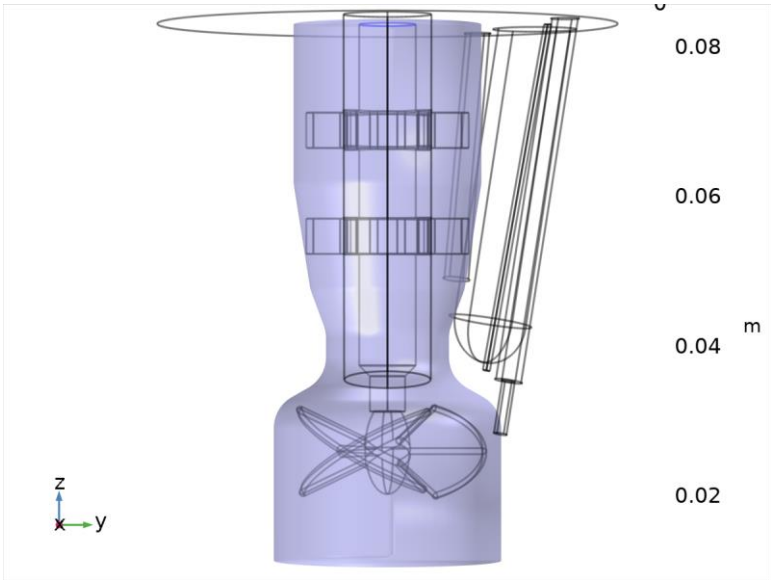

Destination selection

2.1.2 Coordinate Systems

Boundary System 1

|                        |                 |
|------------------------|-----------------|
| Coordinate system type | Boundary system |
| Tag                    | sys1            |



## COORDINATE NAMES

| First | Second | Third |
|-------|--------|-------|
| t1    | t2     | n     |

## 2.1.3 Moving Mesh

### Rotating Domain 1

|     |      |
|-----|------|
| Tag | rot1 |
|-----|------|

## SELECTION

|                        |                                       |
|------------------------|---------------------------------------|
| Geometric entity level | Domain                                |
| Selection              | Geometry geom1: Dimension 3: Domain 2 |

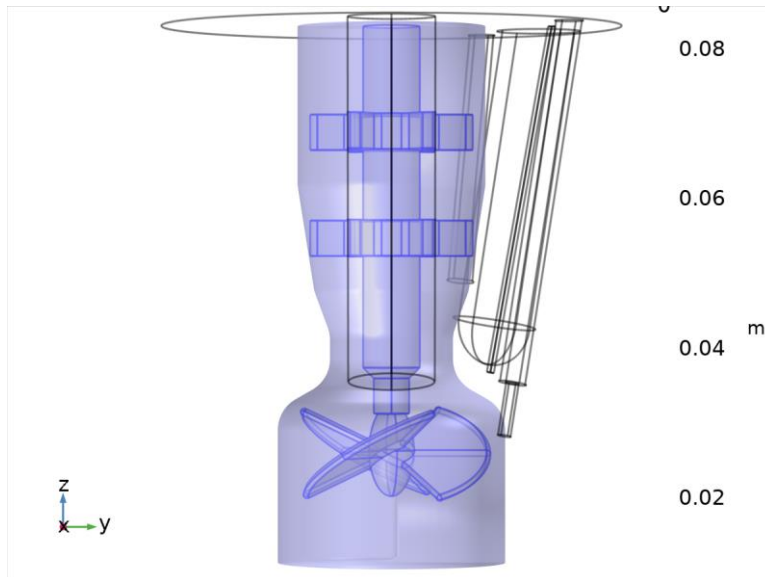

*Selection*

## ROTATION

| Description                    | Value                         |
|--------------------------------|-------------------------------|
| Rotation type                  | Specified rotational velocity |
| Rotational velocity expression | Constant revolutions per time |
| Revolutions per time           | f                             |

## AXIS

| Description              | Value     |
|--------------------------|-----------|
| Rotation axis base point | {0, 0, 0} |

## 2.2 GEOMETRY 1

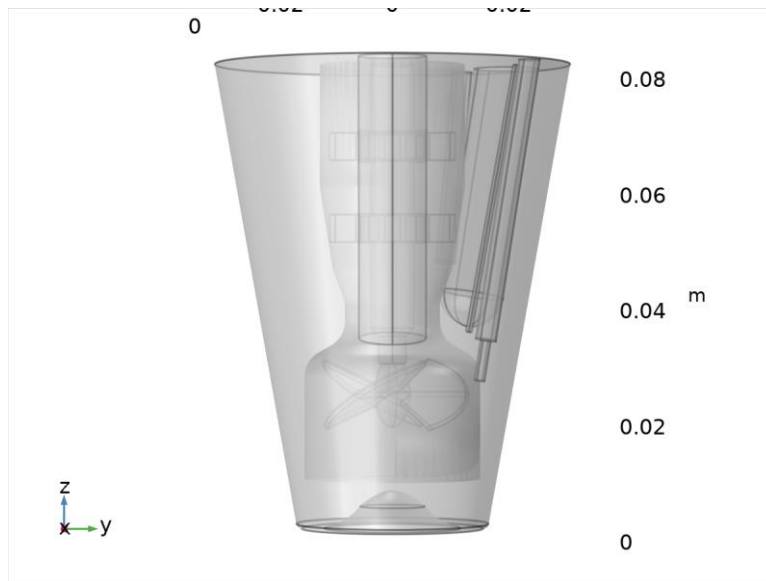

Geometry 1

### UNITS

|              |     |
|--------------|-----|
| Length unit  | m   |
| Angular unit | deg |

### GEOMETRY STATISTICS

| Description          | Value |
|----------------------|-------|
| Space dimension      | 3     |
| Number of domains    | 2     |
| Number of boundaries | 212   |
| Number of edges      | 552   |
| Number of vertices   | 359   |

### 2.2.1 Rührerschaft 1 (pi8)

#### PART

| Description | Value                        |
|-------------|------------------------------|
| Part        | <a href="#">Rührerschaft</a> |

#### POSITION AND ORIENTATION OF OUTPUT

| Description  | Value     |
|--------------|-----------|
| Displacement | {0, 0, 0} |
| Axis type    | zw - axis |

#### SELECTION SETTINGS

| Description                     | Value |
|---------------------------------|-------|
| Keep noncontributing selections | Off   |

### 2.2.2 Rührer 1 (pi7)

#### PART

| Description | Value                  |
|-------------|------------------------|
| Part        | <a href="#">Rührer</a> |

#### POSITION AND ORIENTATION OF OUTPUT

| Description  | Value     |
|--------------|-----------|
| Displacement | {0, 0, 0} |
| Axis type    | zw - axis |

#### DOMAIN SELECTIONS

| Name          | Keep | Physics | Contribute to |
|---------------|------|---------|---------------|
| Vereinigung 1 | Off  | On      | None          |

#### DOMAIN SELECTIONS

| Name          | Keep | Physics | Contribute to |
|---------------|------|---------|---------------|
| Vereinigung 1 | Off  | On      | None          |

#### DOMAIN SELECTIONS

| Name          | Keep | Physics | Contribute to |
|---------------|------|---------|---------------|
| Vereinigung 1 | Off  | On      | None          |

#### DOMAIN SELECTIONS

| Name          | Keep | Physics | Contribute to |
|---------------|------|---------|---------------|
| Vereinigung 1 | Off  | On      | None          |

#### SELECTION SETTINGS

| Description                     | Value |
|---------------------------------|-------|
| Keep noncontributing selections | Off   |

### 2.2.3 Rushton 1 (pi9)

#### PART

| Description | Value                   |
|-------------|-------------------------|
| Part        | <a href="#">Rushton</a> |

#### POSITION AND ORIENTATION OF OUTPUT

| Description | Value |
|-------------|-------|
|-------------|-------|

| Description    | Value                           |
|----------------|---------------------------------|
| Displacement   | {0, 0, pos_R + pos_R2 - 0.0025} |
| Axis type      | zw - axis                       |
| Rotation angle | 30                              |

#### SELECTION SETTINGS

| Description                     | Value |
|---------------------------------|-------|
| Keep noncontributing selections | Off   |

### 2.2.4 Rushton 2 (pi10)

#### PART

| Description | Value                   |
|-------------|-------------------------|
| Part        | <a href="#">Rushton</a> |

#### POSITION AND ORIENTATION OF OUTPUT

| Description    | Value                           |
|----------------|---------------------------------|
| Displacement   | {0, 0, pos_R + pos_R3 - 0.0025} |
| Axis type      | zw - axis                       |
| Rotation angle | 30                              |

#### SELECTION SETTINGS

| Description                     | Value |
|---------------------------------|-------|
| Keep noncontributing selections | Off   |

### 2.2.5 Reaktorkessel 1 (pi5)

#### PART

| Description | Value                         |
|-------------|-------------------------------|
| Part        | <a href="#">Reaktorkessel</a> |

#### POSITION AND ORIENTATION OF OUTPUT

| Description  | Value     |
|--------------|-----------|
| Displacement | {0, 0, 0} |
| Axis type    | zw - axis |

#### SELECTION SETTINGS

| Description                     | Value |
|---------------------------------|-------|
| Keep noncontributing selections | Off   |

## 2.2.6 Sonden 1 (pi6)

### PART

| Description | Value                  |
|-------------|------------------------|
| Part        | <a href="#">Sonden</a> |

### POSITION AND ORIENTATION OF OUTPUT

| Description  | Value     |
|--------------|-----------|
| Displacement | {0, 0, 0} |
| Axis type    | zw - axis |

### SELECTION SETTINGS

| Description                     | Value |
|---------------------------------|-------|
| Keep noncontributing selections | Off   |

## 2.2.7 Difference 1 (dif1)

### SETTINGS

| Description        | Value |
|--------------------|-------|
| Keep input objects | On    |

## 2.2.8 Form Assembly (fin)

### SETTINGS

| Description | Value            |
|-------------|------------------|
| Action      | Form an assembly |

## 2.3 MATERIALS

### 2.3.1 Water

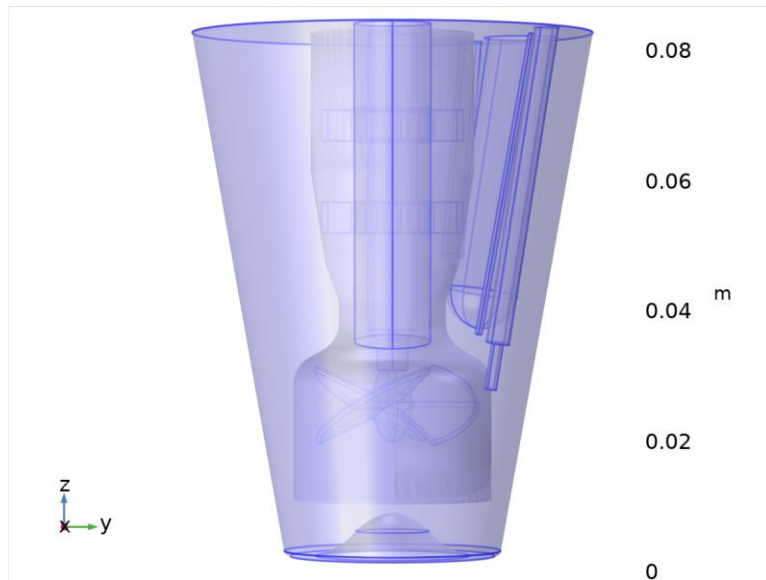

*Water*

#### SELECTION

|                        |                                          |
|------------------------|------------------------------------------|
| Geometric entity level | Domain                                   |
| Selection              | Geometry geom1: Dimension 3: All domains |

#### MATERIAL PARAMETERS

| Name              | Value     | Unit              |
|-------------------|-----------|-------------------|
| Dynamic viscosity | $\eta(T)$ | Pa·s              |
| Density           | $\rho(T)$ | kg/m <sup>3</sup> |

#### BASIC SETTINGS

| Description                          | Value                                                                     |
|--------------------------------------|---------------------------------------------------------------------------|
| Coefficient of thermal expansion     | $\{\{\alpha_p(T), 0, 0\}, \{0, \alpha_p(T), 0\}, \{0, 0, \alpha_p(T)\}\}$ |
| Bulk viscosity                       | $\mu_B(T)$                                                                |
| thermalexpansioncoefficient_symmetry | 3                                                                         |
| bulkviscosity_symmetry               | 0                                                                         |
| Dynamic viscosity                    | $\eta(T)$                                                                 |
| dynamicviscosity_symmetry            | 0                                                                         |
| Ratio of specific heats              | $\gamma_w(T)$                                                             |
| ratioofspecificeat_symmetry          | 0                                                                         |
| Electrical conductivity              | $\{\{5.5e-6[S/m], 0, 0\}, \{0, 5.5e-6[S/m], 0\}, \{0, 0, 5.5e-6[S/m]\}\}$ |

| Description                        | Value                                                |
|------------------------------------|------------------------------------------------------|
| electricconductivity_symmetry      | 3                                                    |
| Heat capacity at constant pressure | $C_p(T)$                                             |
| heatcapacity_symmetry              | 0                                                    |
| Density                            | $\rho(T)$                                            |
| density_symmetry                   | 0                                                    |
| Thermal conductivity               | $\{\{k(T), 0, 0\}, \{0, k(T), 0\}, \{0, 0, k(T)\}\}$ |
| thermalconductivity_symmetry       | 3                                                    |
| Speed of sound                     | $c_s(T)$                                             |
| soundspeed_symmetry                | 0                                                    |

### FUNCTIONS

| Function name | Type          |
|---------------|---------------|
| eta           | Piecewise     |
| $C_p$         | Piecewise     |
| $\rho$        | Piecewise     |
| $k$           | Piecewise     |
| $c_s$         | Interpolation |
| $\alpha_p$    | Analytic      |
| $\gamma_w$    | Analytic      |
| $\mu_B$       | Analytic      |

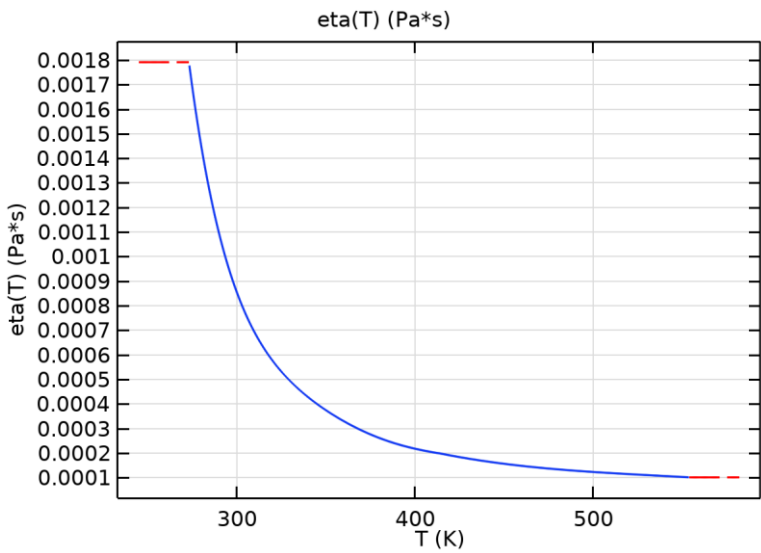

*eta*

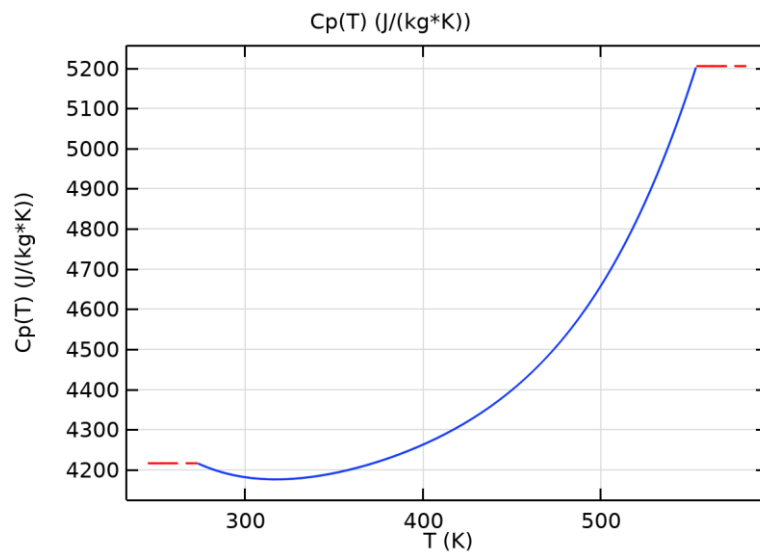

$C_p$

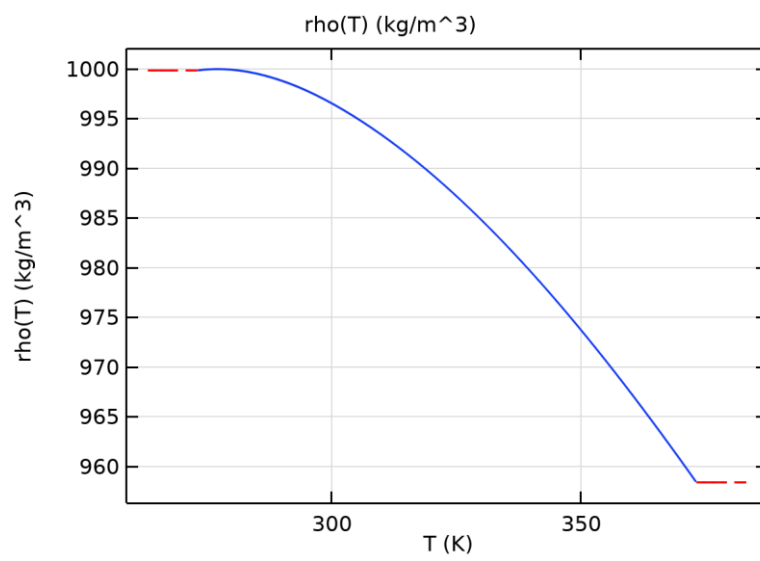

$\rho$



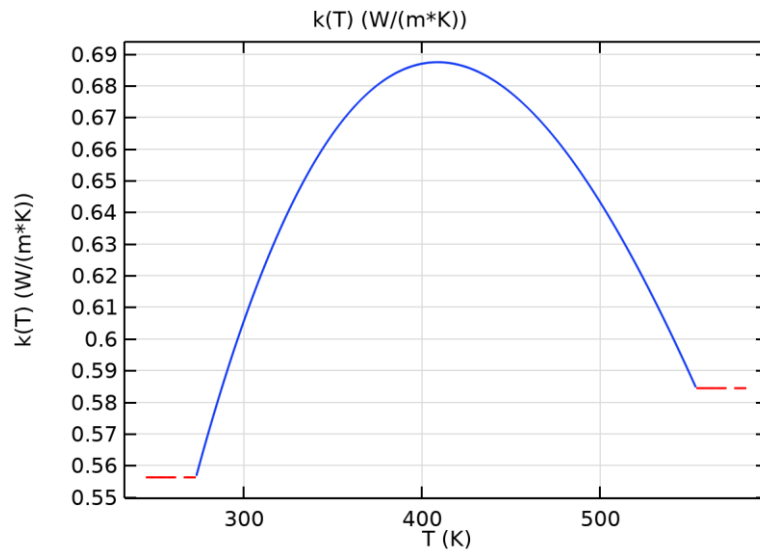

$k$

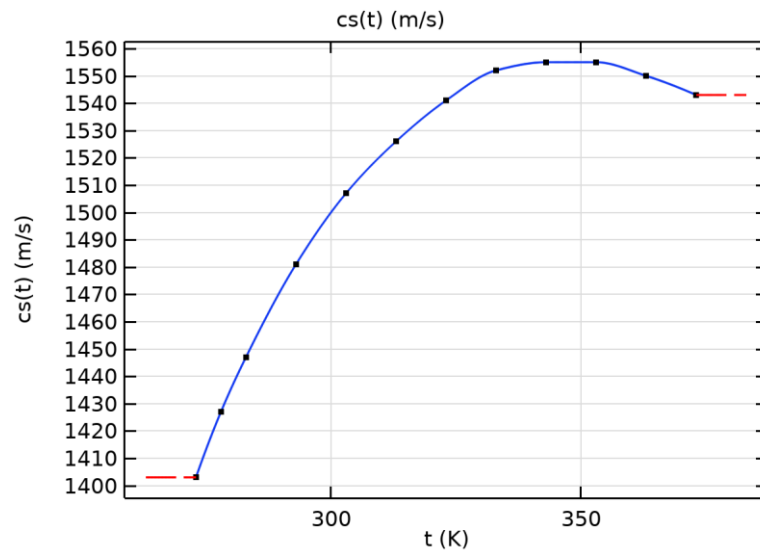

$cs$

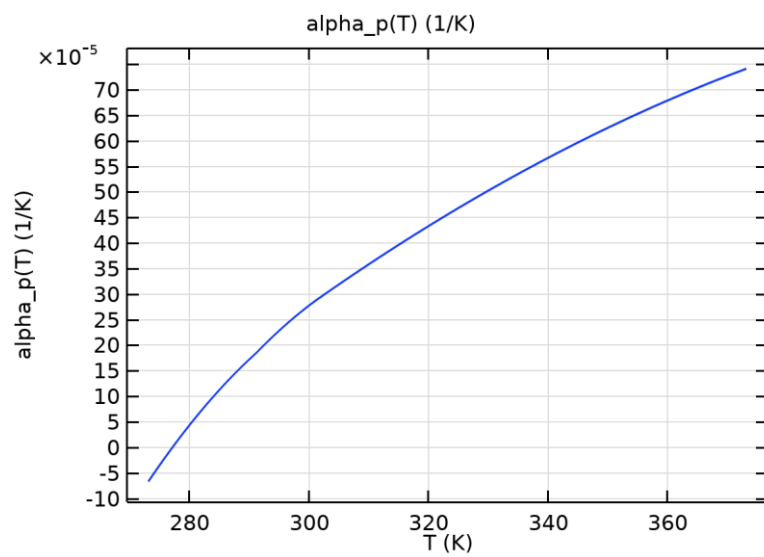

$\alpha_p$

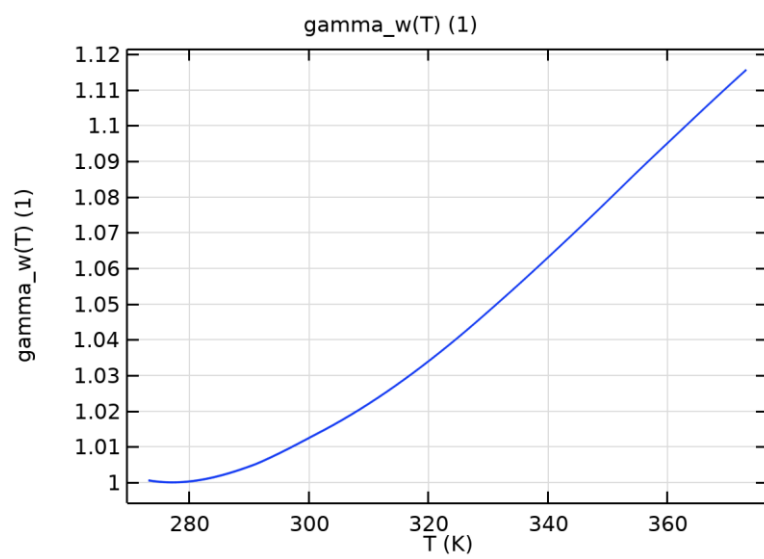

$\gamma_w$

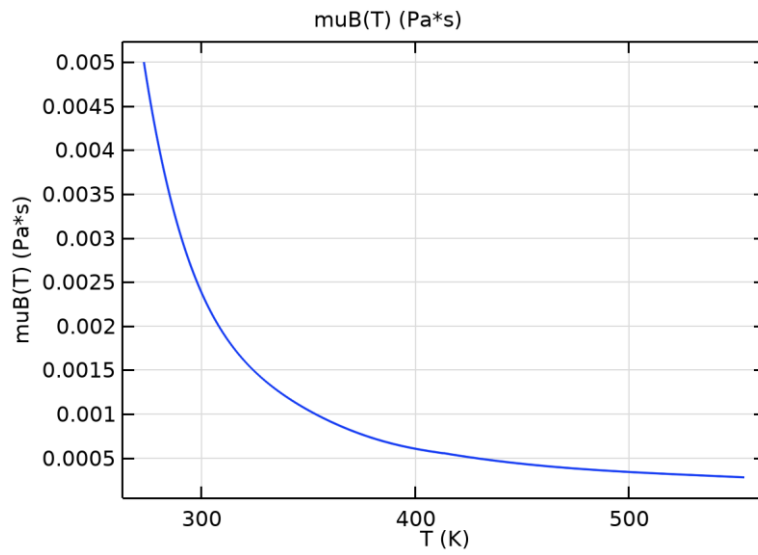

$\mu_B$

## 2.4 TURBULENT FLOW, K-E

### USED PRODUCTS

|                     |
|---------------------|
| COMSOL Multiphysics |
| CFD Module          |

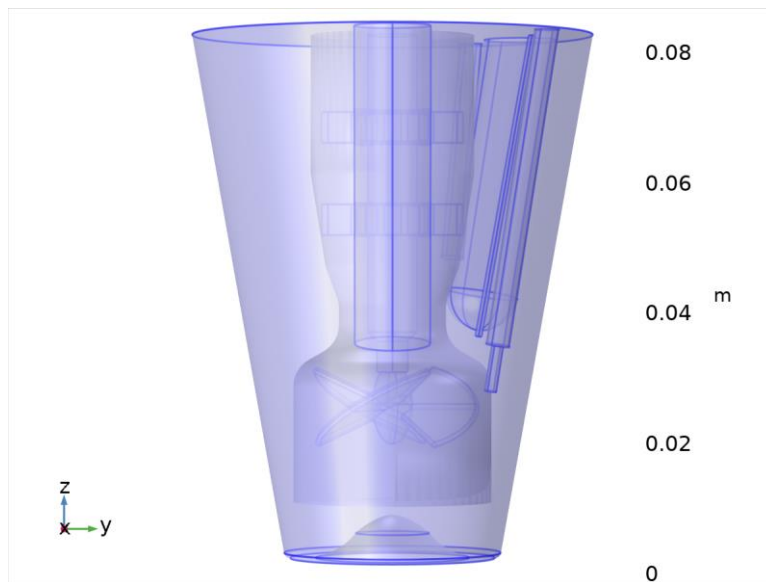

*Turbulent Flow,  $k-\epsilon$*

### SELECTION

|                        |                                          |
|------------------------|------------------------------------------|
| Geometric entity level | Domain                                   |
| Selection              | Geometry geom1: Dimension 3: All domains |

## EQUATIONS

$$\rho(\mathbf{u} \cdot \nabla)\mathbf{u} = \nabla \cdot [-p2\mathbf{I} + \mathbf{K}] + \mathbf{F} + \rho\mathbf{g}$$

$$\rho \nabla \cdot \mathbf{u} = 0$$

$$\mathbf{K} = (\mu + \mu_T)(\nabla\mathbf{u} + (\nabla\mathbf{u})^T)$$

$$\rho(\mathbf{u} \cdot \nabla)k_2 = \nabla \cdot \left[ \left( \mu + \frac{\mu_T}{\sigma_k} \right) \nabla k_2 \right] + P_k - \rho\epsilon$$

$$\rho(\mathbf{u} \cdot \nabla)\epsilon = \nabla \cdot \left[ \left( \mu + \frac{\mu_T}{\sigma_\epsilon} \right) \nabla \epsilon \right] + C_{\epsilon 1} \frac{\epsilon}{k_2} P_k - C_{\epsilon 2} \rho \frac{\epsilon^2}{k_2}, \quad \epsilon = \epsilon p_2$$

$$\mu_T = \rho C_\mu \frac{k_2^2}{\epsilon}$$

$$P_k = \mu_T [\nabla\mathbf{u} : (\nabla\mathbf{u} + (\nabla\mathbf{u})^T)]$$

### 2.4.1 Interface settings

#### Discretization

##### SETTINGS

| Description              | Value   |
|--------------------------|---------|
| Discretization of fluids | P1 + P1 |

#### Physical model

##### SETTINGS

| Description                     | Value               |
|---------------------------------|---------------------|
| Compressibility                 | Incompressible flow |
| Include gravity                 | On                  |
| Use reduced pressure            | Off                 |
| Reference position, x component | 0                   |
| Reference position, y component | 0                   |
| Reference position, z component | 0                   |
| Reference temperature           | User defined        |
| Reference temperature           | 310.15[K]           |
| Reference pressure level        | 1[atm]              |

#### Turbulence

##### SETTINGS

| Description           | Value          |
|-----------------------|----------------|
| Turbulence model type | RANS           |
| Turbulence model      | k - ε          |
| Wall treatment        | Wall functions |

| Description                      | Value |
|----------------------------------|-------|
| Edit turbulence model parameters | Off   |

## 2.4.2 Variables

| Name       | Expression                                                                       | Unit | Description                     | Selection        | Details |
|------------|----------------------------------------------------------------------------------|------|---------------------------------|------------------|---------|
| spf.Tref   | model.input.Tref                                                                 | K    | Reference temperature           | Global           | Meta    |
| spf.rrefx  | 0                                                                                | m    | Reference position, x component | Domains 1–2      |         |
| spf.rrefy  | 0                                                                                | m    | Reference position, y component | Domains 1–2      |         |
| spf.rrefz  | 0                                                                                | m    | Reference position, z component | Domains 1–2      |         |
| spf.dz     | 1                                                                                | m    | Thickness                       | Domains 1–2      |         |
| spf.pref   | 1[atm]                                                                           | Pa   | Reference pressure level        | Domains 1–2      |         |
| spf.pA     | p2+spf.pref                                                                      | Pa   | Absolute pressure               | Domains 1–2      |         |
| spf.hasWF  | 0                                                                                |      | Help variable                   | Boundaries 1–212 |         |
| spf.dt_CFL | 1/max(spf.maxOp(sqrt(ematic_spatial(u-d(x,TIME),v-d(y,TIME),w-d(z,TIME))))),eps) | s    | Time step, CFL=1                | Global           |         |
| spf.sigmax | 0.2                                                                              | 1    | Smoothing parameter             | Domains 1–2      |         |
| spf.Ceps1  | 1.44                                                                             | 1    | Turbulence model parameter      | Domains 1–2      |         |
| spf.Ceps2  | 1.92                                                                             | 1    | Turbulence model parameter      | Domains 1–2      |         |
| spf.C_mu   | 0.09                                                                             | 1    | Turbulence model parameter      | Domains 1–2      |         |
| spf.sigmak | 1                                                                                | 1    | Turbulence model parameter      | Domains 1–2      |         |

| Name                       | Expression                                                                                                                                                                                                                                                     | Unit | Description                | Selection        | Details     |
|----------------------------|----------------------------------------------------------------------------------------------------------------------------------------------------------------------------------------------------------------------------------------------------------------|------|----------------------------|------------------|-------------|
| spf.sigmaeps               | 1.3                                                                                                                                                                                                                                                            | 1    | Turbulence model parameter | Domains 1–2      |             |
| spf.kappav                 | 0.41                                                                                                                                                                                                                                                           | 1    | Turbulence model parameter | Domains 1–2      |             |
| spf.B                      | 5.2                                                                                                                                                                                                                                                            | 1    | Law of the wall constant   | Domains 1–2      |             |
| spf.usePseudoTime Stepping | 1                                                                                                                                                                                                                                                              | 1    | Help variable              | Global           | + operation |
| spf.localCFLvalue          | $3 + \text{if}(\text{niterCMP} \geq 15, 1.3^{\min(-15 + \text{niterCMP}, 7)}, 0) + \text{if}(\text{niterCMP} \geq 40, 9 \cdot 1.3^{\min(-40 + \text{niterCMP}, 9)}, 0) + \text{if}(\text{niterCMP} \geq 70, 90 \cdot 1.3^{\min(-70 + \text{niterCMP}, 9)}, 0)$ |      | Local CFL number           | Domains 1–2      |             |
| spf.locCFL                 | CFLCMP                                                                                                                                                                                                                                                         | 1    | Local CFL number           | Domains 1–2      |             |
| spf.geometryLength Scale   | 0.01629375000000003                                                                                                                                                                                                                                            | m    | Geometry length scale      | Domains 1–2      |             |
| spf.time_step_inv          | $\max(\sqrt{\text{emetric\_spatial}(\text{u}-\text{d}(\text{x}, \text{TIME}), \text{v}-\text{d}(\text{y}, \text{TIME}), \text{w}-\text{d}(\text{z}, \text{TIME})) \cdot 2^{\text{gmg\_level}^2}}, \text{spf.nu}/\text{spf.geometryLengthScale}^2)$             | Hz   | Inverse time step          | Domains 1–2      |             |
| spf.tsti                   | $\text{nojac}(\text{spf.time\_step\_inv}/\text{spf.locCFL})$                                                                                                                                                                                                   | 1/s  | Help variable              | Domains 1–2      |             |
| spf.nx                     | dnx                                                                                                                                                                                                                                                            | 1    | Normal vector, x component | Boundaries 1–212 |             |
| spf.ny                     | dny                                                                                                                                                                                                                                                            | 1    | Normal vector, y component | Boundaries 1–212 |             |
| spf.nz                     | dnz                                                                                                                                                                                                                                                            | 1    | Normal vector, z component | Boundaries 1–212 |             |
| spf.nxmesh                 | dnxmesh                                                                                                                                                                                                                                                        | 1    | Normal vector, x component | Boundaries 1–212 |             |
| spf.nymesh                 | dnymesh                                                                                                                                                                                                                                                        | 1    | Normal vector, y component | Boundaries 1–212 |             |
| spf.nzmesh                 | dnzmesh                                                                                                                                                                                                                                                        | 1    | Normal vector, z component | Boundaries 1–212 |             |

## 2.4.3 Fluid Properties 1

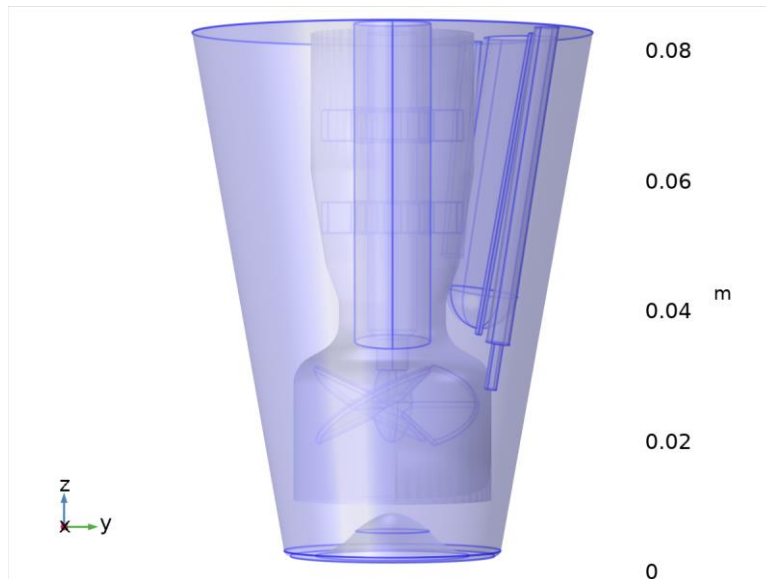

Fluid Properties 1

### SELECTION

|                        |                                          |
|------------------------|------------------------------------------|
| Geometric entity level | Domain                                   |
| Selection              | Geometry geom1: Dimension 3: All domains |

### EQUATIONS

$$\rho(\mathbf{u} \cdot \nabla)\mathbf{u} = \nabla \cdot [-p\mathbf{I} + \mathbf{K}] + \mathbf{F} + \rho\mathbf{g}$$

$$\rho \nabla \cdot \mathbf{u} = 0$$

$$\mathbf{K} = (\mu + \mu_T)(\nabla\mathbf{u} + (\nabla\mathbf{u})^T)$$

$$\rho(\mathbf{u} \cdot \nabla)k_2 = \nabla \cdot \left[ \left( \mu + \frac{\mu_T}{\sigma_k} \right) \nabla k_2 \right] + P_k - \rho\epsilon$$

$$\rho(\mathbf{u} \cdot \nabla)\epsilon = \nabla \cdot \left[ \left( \mu + \frac{\mu_T}{\sigma_\epsilon} \right) \nabla \epsilon \right] + C_{\epsilon 1} \frac{\epsilon}{k_2} P_k - C_{\epsilon 2} \rho \frac{\epsilon^2}{k_2}, \quad \epsilon = \text{ep2}$$

## Fluid properties

### SETTINGS

| Description       | Value         |
|-------------------|---------------|
| Density           | From material |
| Dynamic viscosity | From material |

## Mixing length limit

### SETTINGS

| Description         | Value     |
|---------------------|-----------|
| Mixing length limit | Automatic |

## Model input

### SETTINGS

| Description | Value              |
|-------------|--------------------|
| Temperature | Common model input |

### PROPERTIES FROM MATERIAL

| Property          | Material | Property group |
|-------------------|----------|----------------|
| Density           | Water    | Basic          |
| Dynamic viscosity | Water    | Basic          |

## Variables

| Name             | Expression                      | Unit | Description     | Selection   | Details |
|------------------|---------------------------------|------|-----------------|-------------|---------|
| spf.geometryLeng | $0.25 * \text{spf.l\_mix\_lim}$ | m    | Geometry length | Domains 1–2 |         |



| Name       | Expression                                                                                                                                                                                                                                                                             | Unit                           | Description                                        | Selection   | Details     |
|------------|----------------------------------------------------------------------------------------------------------------------------------------------------------------------------------------------------------------------------------------------------------------------------------------|--------------------------------|----------------------------------------------------|-------------|-------------|
| thScale    |                                                                                                                                                                                                                                                                                        |                                | scale                                              |             |             |
| spf.Fgtotx | 0                                                                                                                                                                                                                                                                                      | N/m <sup>3</sup>               | Gravity force, x component                         | Domains 1–2 | + operation |
| spf.Fgtoty | 0                                                                                                                                                                                                                                                                                      | N/m <sup>3</sup>               | Gravity force, y component                         | Domains 1–2 | + operation |
| spf.Fgtotz | 0                                                                                                                                                                                                                                                                                      | N/m <sup>3</sup>               | Gravity force, z component                         | Domains 1–2 | + operation |
| spf.k_nn   | max(k2,0)                                                                                                                                                                                                                                                                              | m <sup>2</sup> /s <sup>2</sup> | Regularized turbulent kinetic energy               | Domains 1–2 |             |
| spf.mu     | material.mu                                                                                                                                                                                                                                                                            | Pa-s                           | Dynamic viscosity                                  | Domains 1–2 | Meta        |
| spf.rho    | subst(material.rho,spf.fp1.mininput_temperature,spf.Trho,spf.fp1.mininput_pressure,spf.prho)                                                                                                                                                                                           | kg/m <sup>3</sup>              | Density                                            | Domains 1–2 | Meta        |
| uxt        | uxTIME-<br>uxx*d(x,TIME)-<br>uxy*d(y,TIME)-<br>uxz*d(z,TIME)                                                                                                                                                                                                                           | 1/s <sup>2</sup>               | Gradient of u, x component, first time derivative  | Domains 1–2 |             |
| uyt        | uyTIME-<br>uyx*d(x,TIME)-<br>uyy*d(y,TIME)-<br>uyz*d(z,TIME)                                                                                                                                                                                                                           | 1/s <sup>2</sup>               | Gradient of u, y component, first time derivative  | Domains 1–2 |             |
| uzt        | uzTIME-<br>uzx*d(x,TIME)-<br>uzy*d(y,TIME)-<br>uzz*d(z,TIME)                                                                                                                                                                                                                           | 1/s <sup>2</sup>               | Gradient of u, z component, first time derivative  | Domains 1–2 |             |
| uxtt       | d(uxTIME-<br>uxx*d(x,TIME)-<br>uxy*d(y,TIME)-<br>uxz*d(z,TIME),TIME)-<br>d(uxTIME-<br>uxx*d(x,TIME)-<br>uxy*d(y,TIME)-<br>uxz*d(z,TIME),x)*d(x,TIME)-<br>d(uxTIME-<br>uxx*d(x,TIME)-<br>uxy*d(y,TIME)-<br>uxz*d(z,TIME),y)*d(y,TIME)-<br>d(uxTIME-<br>uxx*d(x,TIME)-<br>uxy*d(y,TIME)- | 1/s <sup>3</sup>               | Gradient of u, x component, second time derivative | Domains 1–2 |             |

| Name | Expression                                                                                                                                                                                                                                                                                                                                                                                                                                                                            | Unit    | Description                                        | Selection   | Details |
|------|---------------------------------------------------------------------------------------------------------------------------------------------------------------------------------------------------------------------------------------------------------------------------------------------------------------------------------------------------------------------------------------------------------------------------------------------------------------------------------------|---------|----------------------------------------------------|-------------|---------|
|      | $uxz \cdot d(z, TIME), z) \cdot d(z, TIME)$                                                                                                                                                                                                                                                                                                                                                                                                                                           |         |                                                    |             |         |
| uytt | $d(uyTIME -$<br>$uyx \cdot d(x, TIME) -$<br>$uyy \cdot d(y, TIME) -$<br>$uyz \cdot d(z, TIME), TIME) -$<br>$d(uyTIME -$<br>$uyx \cdot d(x, TIME) -$<br>$uyy \cdot d(y, TIME) -$<br>$uyz \cdot d(z, TIME), x) \cdot d(x,$<br>$TIME) - d(uyTIME -$<br>$uyx \cdot d(x, TIME) -$<br>$uyy \cdot d(y, TIME) -$<br>$uyz \cdot d(z, TIME), y) \cdot d(y,$<br>$TIME) - d(uyTIME -$<br>$uyx \cdot d(x, TIME) -$<br>$uyy \cdot d(y, TIME) -$<br>$uyz \cdot d(z, TIME), z) \cdot d(z,$<br>$TIME)$ | $1/s^3$ | Gradient of u, y component, second time derivative | Domains 1–2 |         |
| uztt | $d(uzTIME -$<br>$uzx \cdot d(x, TIME) -$<br>$uzy \cdot d(y, TIME) -$<br>$uzz \cdot d(z, TIME), TIME) -$<br>$d(uzTIME -$<br>$uzx \cdot d(x, TIME) -$<br>$uzy \cdot d(y, TIME) -$<br>$uzz \cdot d(z, TIME), x) \cdot d(x,$<br>$TIME) - d(uzTIME -$<br>$uzx \cdot d(x, TIME) -$<br>$uzy \cdot d(y, TIME) -$<br>$uzz \cdot d(z, TIME), y) \cdot d(y,$<br>$TIME) - d(uzTIME -$<br>$uzx \cdot d(x, TIME) -$<br>$uzy \cdot d(y, TIME) -$<br>$uzz \cdot d(z, TIME), z) \cdot d(z,$<br>$TIME)$ | $1/s^3$ | Gradient of u, z component, second time derivative | Domains 1–2 |         |
| vxt  | $vxTIME -$<br>$vxx \cdot d(x, TIME) -$<br>$vxy \cdot d(y, TIME) -$<br>$vxz \cdot d(z, TIME)$                                                                                                                                                                                                                                                                                                                                                                                          | $1/s^2$ | Gradient of v, x component, first time derivative  | Domains 1–2 |         |
| vyt  | $vyTIME -$<br>$vyx \cdot d(x, TIME) -$<br>$vyy \cdot d(y, TIME) -$<br>$vyz \cdot d(z, TIME)$                                                                                                                                                                                                                                                                                                                                                                                          | $1/s^2$ | Gradient of v, y component, first time derivative  | Domains 1–2 |         |
| vzt  | $vzTIME -$<br>$vzx \cdot d(x, TIME) -$                                                                                                                                                                                                                                                                                                                                                                                                                                                | $1/s^2$ | Gradient of v, z component, first                  | Domains 1–2 |         |

| Name             | Expression                                                                                                                                                                                                                                                                                                                                                                                                                                                                                                                                                                                                   | Unit             | Description                                        | Selection   | Details |
|------------------|--------------------------------------------------------------------------------------------------------------------------------------------------------------------------------------------------------------------------------------------------------------------------------------------------------------------------------------------------------------------------------------------------------------------------------------------------------------------------------------------------------------------------------------------------------------------------------------------------------------|------------------|----------------------------------------------------|-------------|---------|
|                  | $v_{zy} \cdot d(y, \text{TIME}) - v_{zz} \cdot d(z, \text{TIME})$                                                                                                                                                                                                                                                                                                                                                                                                                                                                                                                                            |                  | time derivative                                    |             |         |
| vx <sub>tt</sub> | $d(v_x \text{TIME} - v_{xx} \cdot d(x, \text{TIME}) - v_{xy} \cdot d(y, \text{TIME}) - v_{xz} \cdot d(z, \text{TIME}), \text{TIME}) -$<br>$d(v_x \text{TIME} - v_{xx} \cdot d(x, \text{TIME}) - v_{xy} \cdot d(y, \text{TIME}) - v_{xz} \cdot d(z, \text{TIME}), x) \cdot d(x, \text{TIME}) -$<br>$d(v_x \text{TIME} - v_{xx} \cdot d(x, \text{TIME}) - v_{xy} \cdot d(y, \text{TIME}) - v_{xz} \cdot d(z, \text{TIME}), y) \cdot d(y, \text{TIME}) -$<br>$d(v_x \text{TIME} - v_{xx} \cdot d(x, \text{TIME}) - v_{xy} \cdot d(y, \text{TIME}) - v_{xz} \cdot d(z, \text{TIME}), z) \cdot d(z, \text{TIME})$ | 1/s <sup>3</sup> | Gradient of v, x component, second time derivative | Domains 1–2 |         |
| vy <sub>tt</sub> | $d(v_y \text{TIME} - v_{yx} \cdot d(x, \text{TIME}) - v_{yy} \cdot d(y, \text{TIME}) - v_{yz} \cdot d(z, \text{TIME}), \text{TIME}) -$<br>$d(v_y \text{TIME} - v_{yx} \cdot d(x, \text{TIME}) - v_{yy} \cdot d(y, \text{TIME}) - v_{yz} \cdot d(z, \text{TIME}), x) \cdot d(x, \text{TIME}) -$<br>$d(v_y \text{TIME} - v_{yx} \cdot d(x, \text{TIME}) - v_{yy} \cdot d(y, \text{TIME}) - v_{yz} \cdot d(z, \text{TIME}), y) \cdot d(y, \text{TIME}) -$<br>$d(v_y \text{TIME} - v_{yx} \cdot d(x, \text{TIME}) - v_{yy} \cdot d(y, \text{TIME}) - v_{yz} \cdot d(z, \text{TIME}), z) \cdot d(z, \text{TIME})$ | 1/s <sup>3</sup> | Gradient of v, y component, second time derivative | Domains 1–2 |         |
| vz <sub>tt</sub> | $d(v_z \text{TIME} - v_{zx} \cdot d(x, \text{TIME}) - v_{zy} \cdot d(y, \text{TIME}) - v_{zz} \cdot d(z, \text{TIME}), \text{TIME}) -$<br>$d(v_z \text{TIME} - v_{zx} \cdot d(x, \text{TIME}) - v_{zy} \cdot d(y, \text{TIME}) - v_{zz} \cdot d(z, \text{TIME}), x) \cdot d(x, \text{TIME}) -$<br>$d(v_z \text{TIME} - v_{zx} \cdot d(x, \text{TIME}) - v_{zy} \cdot d(y, \text{TIME}) - v_{zz} \cdot d(z, \text{TIME}), y) \cdot d(y, \text{TIME}) -$<br>$d(v_z \text{TIME} - v_{zx} \cdot d(x, \text{TIME}) - v_{zy} \cdot d(y, \text{TIME}) - v_{zz} \cdot d(z, \text{TIME}), z) \cdot d(z, \text{TIME})$ | 1/s <sup>3</sup> | Gradient of v, z component, second time derivative | Domains 1–2 |         |

| Name | Expression                                                                                                                                                                                                                                                                                                                                                                                                                                                                                                                                                                                                                                                               | Unit    | Description                                        | Selection   | Details |
|------|--------------------------------------------------------------------------------------------------------------------------------------------------------------------------------------------------------------------------------------------------------------------------------------------------------------------------------------------------------------------------------------------------------------------------------------------------------------------------------------------------------------------------------------------------------------------------------------------------------------------------------------------------------------------------|---------|----------------------------------------------------|-------------|---------|
|      | $v_{zz} \frac{d}{dt}(z, \text{TIME}, y) \frac{d}{dt}(y, \text{TIME}) - d(v_z \text{TIME} - v_{zx} \frac{d}{dt}(x, \text{TIME}) - v_{zy} \frac{d}{dt}(y, \text{TIME}) - v_{zz} \frac{d}{dt}(z, \text{TIME}), z) \frac{d}{dt}(z, \text{TIME})$                                                                                                                                                                                                                                                                                                                                                                                                                             |         |                                                    |             |         |
| wxt  | $w_x \text{TIME} - w_{xx} \frac{d}{dt}(x, \text{TIME}) - w_{xy} \frac{d}{dt}(y, \text{TIME}) - w_{xz} \frac{d}{dt}(z, \text{TIME})$                                                                                                                                                                                                                                                                                                                                                                                                                                                                                                                                      | $1/s^2$ | Gradient of w, x component, first time derivative  | Domains 1–2 |         |
| wyt  | $w_y \text{TIME} - w_{yx} \frac{d}{dt}(x, \text{TIME}) - w_{yy} \frac{d}{dt}(y, \text{TIME}) - w_{yz} \frac{d}{dt}(z, \text{TIME})$                                                                                                                                                                                                                                                                                                                                                                                                                                                                                                                                      | $1/s^2$ | Gradient of w, y component, first time derivative  | Domains 1–2 |         |
| wzt  | $w_z \text{TIME} - w_{zx} \frac{d}{dt}(x, \text{TIME}) - w_{zy} \frac{d}{dt}(y, \text{TIME}) - w_{zz} \frac{d}{dt}(z, \text{TIME})$                                                                                                                                                                                                                                                                                                                                                                                                                                                                                                                                      | $1/s^2$ | Gradient of w, z component, first time derivative  | Domains 1–2 |         |
| wxtt | $d(w_x \text{TIME} - w_{xx} \frac{d}{dt}(x, \text{TIME}) - w_{xy} \frac{d}{dt}(y, \text{TIME}) - w_{xz} \frac{d}{dt}(z, \text{TIME}), \text{TIME}) - d(w_x \text{TIME} - w_{xx} \frac{d}{dt}(x, \text{TIME}) - w_{xy} \frac{d}{dt}(y, \text{TIME}) - w_{xz} \frac{d}{dt}(z, \text{TIME}), x) \frac{d}{dt}(x, \text{TIME}) - d(w_x \text{TIME} - w_{xx} \frac{d}{dt}(x, \text{TIME}) - w_{xy} \frac{d}{dt}(y, \text{TIME}) - w_{xz} \frac{d}{dt}(z, \text{TIME}), y) \frac{d}{dt}(y, \text{TIME}) - d(w_x \text{TIME} - w_{xx} \frac{d}{dt}(x, \text{TIME}) - w_{xy} \frac{d}{dt}(y, \text{TIME}) - w_{xz} \frac{d}{dt}(z, \text{TIME}), z) \frac{d}{dt}(z, \text{TIME})$ | $1/s^3$ | Gradient of w, x component, second time derivative | Domains 1–2 |         |
| wytt | $d(w_y \text{TIME} - w_{yx} \frac{d}{dt}(x, \text{TIME}) - w_{yy} \frac{d}{dt}(y, \text{TIME}) - w_{yz} \frac{d}{dt}(z, \text{TIME}), \text{TIME}) - d(w_y \text{TIME} - w_{yx} \frac{d}{dt}(x, \text{TIME}) - w_{yy} \frac{d}{dt}(y, \text{TIME}) - w_{yz} \frac{d}{dt}(z, \text{TIME}), x) \frac{d}{dt}(x, \text{TIME}) - d(w_y \text{TIME} - w_{yx} \frac{d}{dt}(x, \text{TIME}) - w_{yy} \frac{d}{dt}(y, \text{TIME}) - w_{yz} \frac{d}{dt}(z, \text{TIME}), y) \frac{d}{dt}(y, \text{TIME}) - d(w_y \text{TIME} - w_{yx} \frac{d}{dt}(x, \text{TIME}) - w_{yy} \frac{d}{dt}(y, \text{TIME}) - w_{yz} \frac{d}{dt}(z, \text{TIME}), z) \frac{d}{dt}(z, \text{TIME})$ | $1/s^3$ | Gradient of w, y component, second time derivative | Domains 1–2 |         |

| Name | Expression                                                                                                                                                                                                                                                                                                                                                                                                                                                                                                                                            | Unit    | Description                                         | Selection   | Details |
|------|-------------------------------------------------------------------------------------------------------------------------------------------------------------------------------------------------------------------------------------------------------------------------------------------------------------------------------------------------------------------------------------------------------------------------------------------------------------------------------------------------------------------------------------------------------|---------|-----------------------------------------------------|-------------|---------|
|      | $wyz \cdot d(z, \text{TIME}), y) \cdot d(y, \text{TIME}) - d(wy \text{TIME} - wyx \cdot d(x, \text{TIME}) - wyy \cdot d(y, \text{TIME}) - wyz \cdot d(z, \text{TIME}), z) \cdot d(z, \text{TIME})$                                                                                                                                                                                                                                                                                                                                                    |         |                                                     |             |         |
| wztt | $d(wz \text{TIME} - wzx \cdot d(x, \text{TIME}) - wzy \cdot d(y, \text{TIME}) - wzz \cdot d(z, \text{TIME}), \text{TIME}) - d(wz \text{TIME} - wzx \cdot d(x, \text{TIME}) - wzy \cdot d(y, \text{TIME}) - wzz \cdot d(z, \text{TIME}), x) \cdot d(x, \text{TIME}) - d(wz \text{TIME} - wzx \cdot d(x, \text{TIME}) - wzy \cdot d(y, \text{TIME}) - wzz \cdot d(z, \text{TIME}), y) \cdot d(y, \text{TIME}) - d(wz \text{TIME} - wzx \cdot d(x, \text{TIME}) - wzy \cdot d(y, \text{TIME}) - wzz \cdot d(z, \text{TIME}), z) \cdot d(z, \text{TIME})$ | $1/s^3$ | Gradient of w, z component, second time derivative  | Domains 1–2 |         |
| ut   | $u \text{TIME} - ux \cdot d(x, \text{TIME}) - uy \cdot d(y, \text{TIME}) - uz \cdot d(z, \text{TIME})$                                                                                                                                                                                                                                                                                                                                                                                                                                                | $m/s^2$ | Velocity field, first time derivative, x component  | Domains 1–2 |         |
| vt   | $v \text{TIME} - vx \cdot d(x, \text{TIME}) - vy \cdot d(y, \text{TIME}) - vz \cdot d(z, \text{TIME})$                                                                                                                                                                                                                                                                                                                                                                                                                                                | $m/s^2$ | Velocity field, first time derivative, y component  | Domains 1–2 |         |
| wt   | $w \text{TIME} - wx \cdot d(x, \text{TIME}) - wy \cdot d(y, \text{TIME}) - wz \cdot d(z, \text{TIME})$                                                                                                                                                                                                                                                                                                                                                                                                                                                | $m/s^2$ | Velocity field, first time derivative, z component  | Domains 1–2 |         |
| utt  | $d(u \text{TIME} - ux \cdot d(x, \text{TIME}) - uy \cdot d(y, \text{TIME}) - uz \cdot d(z, \text{TIME}), \text{TIME}) - d(u \text{TIME} - ux \cdot d(x, \text{TIME}) - uy \cdot d(y, \text{TIME}) - uz \cdot d(z, \text{TIME}), x) \cdot d(x, \text{TIME}) - d(u \text{TIME} - ux \cdot d(x, \text{TIME}) - uy \cdot d(y, \text{TIME}) -$                                                                                                                                                                                                             | $m/s^3$ | Velocity field, second time derivative, x component | Domains 1–2 |         |

| Name | Expression                                                                                                                                                                                                                                                                                                                                                                                                        | Unit                                 | Description                                         | Selection   | Details |
|------|-------------------------------------------------------------------------------------------------------------------------------------------------------------------------------------------------------------------------------------------------------------------------------------------------------------------------------------------------------------------------------------------------------------------|--------------------------------------|-----------------------------------------------------|-------------|---------|
|      | $uz \cdot d(z, TIME), y) \cdot d(y, TIME) - d(u \cdot TIME - ux \cdot d(x, TIME) - uy \cdot d(y, TIME) - uz \cdot d(z, TIME), z) \cdot d(z, TIME)$                                                                                                                                                                                                                                                                |                                      |                                                     |             |         |
| vtt  | $d(v \cdot TIME - vx \cdot d(x, TIME) - vy \cdot d(y, TIME) - vz \cdot d(z, TIME), TIME) - d(v \cdot TIME - vx \cdot d(x, TIME) - vy \cdot d(y, TIME) - vz \cdot d(z, TIME), x) \cdot d(x, TIME) - d(v \cdot TIME - vx \cdot d(x, TIME) - vy \cdot d(y, TIME) - vz \cdot d(z, TIME), y) \cdot d(y, TIME) - d(v \cdot TIME - vx \cdot d(x, TIME) - vy \cdot d(y, TIME) - vz \cdot d(z, TIME), z) \cdot d(z, TIME)$ | m/s <sup>3</sup>                     | Velocity field, second time derivative, y component | Domains 1–2 |         |
| wtt  | $d(w \cdot TIME - wx \cdot d(x, TIME) - wy \cdot d(y, TIME) - wz \cdot d(z, TIME), TIME) - d(w \cdot TIME - wx \cdot d(x, TIME) - wy \cdot d(y, TIME) - wz \cdot d(z, TIME), x) \cdot d(x, TIME) - d(w \cdot TIME - wx \cdot d(x, TIME) - wy \cdot d(y, TIME) - wz \cdot d(z, TIME), y) \cdot d(y, TIME) - d(w \cdot TIME - wx \cdot d(x, TIME) - wy \cdot d(y, TIME) - wz \cdot d(z, TIME), z) \cdot d(z, TIME)$ | m/s <sup>3</sup>                     | Velocity field, second time derivative, z component | Domains 1–2 |         |
| p2xt | $p2x \cdot TIME - p2xx \cdot d(x, TIME) - p2xy \cdot d(y, TIME) - p2xz \cdot d(z, TIME)$                                                                                                                                                                                                                                                                                                                          | kg/(m <sup>2</sup> ·s <sup>3</sup> ) | Gradient of p2, x component, first time derivative  | Domains 1–2 |         |
| p2yt | $p2y \cdot TIME - p2yx \cdot d(x, TIME) -$                                                                                                                                                                                                                                                                                                                                                                        | kg/(m <sup>2</sup> ·s <sup>3</sup> ) | Gradient of p2, y component, first                  | Domains 1–2 |         |

| Name  | Expression                                                                                                                                                                                                                                                                                                                                                                                                                                                                                                                                                        | Unit                                      | Description                                         | Selection   | Details |
|-------|-------------------------------------------------------------------------------------------------------------------------------------------------------------------------------------------------------------------------------------------------------------------------------------------------------------------------------------------------------------------------------------------------------------------------------------------------------------------------------------------------------------------------------------------------------------------|-------------------------------------------|-----------------------------------------------------|-------------|---------|
|       | $p2yy \cdot d(y, \text{TIME}) - p2yz \cdot d(z, \text{TIME})$                                                                                                                                                                                                                                                                                                                                                                                                                                                                                                     |                                           | time derivative                                     |             |         |
| p2zt  | $p2z\text{TIME} - p2zx \cdot d(x, \text{TIME}) - p2zy \cdot d(y, \text{TIME}) - p2zz \cdot d(z, \text{TIME})$                                                                                                                                                                                                                                                                                                                                                                                                                                                     | $\text{kg}/(\text{m}^2 \cdot \text{s}^3)$ | Gradient of p2, z component, first time derivative  | Domains 1–2 |         |
| p2xtt | $d(p2x\text{TIME} - p2xx \cdot d(x, \text{TIME}) - p2xy \cdot d(y, \text{TIME}) - p2xz \cdot d(z, \text{TIME}), \text{TIME}) - d(p2x\text{TIME} - p2xx \cdot d(x, \text{TIME}) - p2xy \cdot d(y, \text{TIME}) - p2xz \cdot d(z, \text{TIME}), x) \cdot d(x, \text{TIME}) - d(p2x\text{TIME} - p2xx \cdot d(x, \text{TIME}) - p2xy \cdot d(y, \text{TIME}) - p2xz \cdot d(z, \text{TIME}), y) \cdot d(y, \text{TIME}) - d(p2x\text{TIME} - p2xx \cdot d(x, \text{TIME}) - p2xy \cdot d(y, \text{TIME}) - p2xz \cdot d(z, \text{TIME}), z) \cdot d(z, \text{TIME})$ | $\text{kg}/(\text{m}^2 \cdot \text{s}^4)$ | Gradient of p2, x component, second time derivative | Domains 1–2 |         |
| p2ytt | $d(p2y\text{TIME} - p2yx \cdot d(x, \text{TIME}) - p2yy \cdot d(y, \text{TIME}) - p2yz \cdot d(z, \text{TIME}), \text{TIME}) - d(p2y\text{TIME} - p2yx \cdot d(x, \text{TIME}) - p2yy \cdot d(y, \text{TIME}) - p2yz \cdot d(z, \text{TIME}), x) \cdot d(x, \text{TIME}) - d(p2y\text{TIME} - p2yx \cdot d(x, \text{TIME}) - p2yy \cdot d(y, \text{TIME}) - p2yz \cdot d(z, \text{TIME}), y) \cdot d(y, \text{TIME}) - d(p2y\text{TIME} - p2yx \cdot d(x, \text{TIME}) - p2yy \cdot d(y, \text{TIME}) - p2yz \cdot d(z, \text{TIME}), z) \cdot d(z, \text{TIME})$ | $\text{kg}/(\text{m}^2 \cdot \text{s}^4)$ | Gradient of p2, y component, second time derivative | Domains 1–2 |         |
| p2ztt | $d(p2z\text{TIME} - p2zx \cdot d(x, \text{TIME}) - p2zy \cdot d(y, \text{TIME}) - p2zz \cdot d(z, \text{TIME}), \text{TIME}) - d(p2z\text{TIME} - p2zx \cdot d(x, \text{TIME}) -$                                                                                                                                                                                                                                                                                                                                                                                 | $\text{kg}/(\text{m}^2 \cdot \text{s}^4)$ | Gradient of p2, z component, second time derivative | Domains 1–2 |         |

| Name       | Expression                                                                                                                                                                                                                                                                                                                                                                                                                                            | Unit              | Description                            | Selection   | Details |
|------------|-------------------------------------------------------------------------------------------------------------------------------------------------------------------------------------------------------------------------------------------------------------------------------------------------------------------------------------------------------------------------------------------------------------------------------------------------------|-------------------|----------------------------------------|-------------|---------|
|            | $p_{2zy} \cdot d(y, TIME) - p_{2zz} \cdot d(z, TIME), x) \cdot d(x, TIME) - d(p_{2z} \cdot TIME - p_{2zx} \cdot d(x, TIME) - p_{2zy} \cdot d(y, TIME) - p_{2zz} \cdot d(z, TIME), y) \cdot d(y, TIME) - d(p_{2z} \cdot TIME - p_{2zx} \cdot d(x, TIME) - p_{2zy} \cdot d(y, TIME) - p_{2zz} \cdot d(z, TIME), z) \cdot d(z, TIME)$                                                                                                                    |                   |                                        |             |         |
| p2t        | $p_{2TIME} - p_{2x} \cdot d(x, TIME) - p_{2y} \cdot d(y, TIME) - p_{2z} \cdot d(z, TIME)$                                                                                                                                                                                                                                                                                                                                                             | Pa/s              | Pressure, first time derivative        | Domains 1–2 |         |
| p2tt       | $d(p_{2TIME} - p_{2x} \cdot d(x, TIME) - p_{2y} \cdot d(y, TIME) - p_{2z} \cdot d(z, TIME), TIME) - d(p_{2TIME} - p_{2x} \cdot d(x, TIME) - p_{2y} \cdot d(y, TIME) - p_{2z} \cdot d(z, TIME), x) \cdot d(x, TIME) - d(p_{2TIME} - p_{2x} \cdot d(x, TIME) - p_{2y} \cdot d(y, TIME) - p_{2z} \cdot d(z, TIME), y) \cdot d(y, TIME) - d(p_{2TIME} - p_{2x} \cdot d(x, TIME) - p_{2y} \cdot d(y, TIME) - p_{2z} \cdot d(z, TIME), z) \cdot d(z, TIME)$ | Pa/s <sup>2</sup> | Pressure, second time derivative       | Domains 1–2 |         |
| spf.Trho   | spf.Tref                                                                                                                                                                                                                                                                                                                                                                                                                                              | K                 | Temperature for density evaluation     | Domains 1–2 |         |
| spf.prho   | spf.pref                                                                                                                                                                                                                                                                                                                                                                                                                                              | Pa                | Pressure for the evaluation of density | Domains 1–2 |         |
| spf.rhoref | subst(material.rho, spf.fp1.minput_temperature, spf.Tref, spf.fp1.minput_pressure, spf.pref)                                                                                                                                                                                                                                                                                                                                                          | kg/m <sup>3</sup> | Reference density                      | Domains 1–2 | Meta    |
| spf.mumat  | material.mu                                                                                                                                                                                                                                                                                                                                                                                                                                           | Pa-s              | Dynamic viscosity                      | Domains 1–2 | Meta    |



| Name       | Expression      | Unit | Description                        | Selection   | Details |
|------------|-----------------|------|------------------------------------|-------------|---------|
| spf.srijxx | $u_x$           | 1/s  | Strain rate tensor, xx component   | Domains 1–2 |         |
| spf.srijyx | $0.5*(v_x+u_y)$ | 1/s  | Strain rate tensor, yx component   | Domains 1–2 |         |
| spf.srijzx | $0.5*(w_x+u_z)$ | 1/s  | Strain rate tensor, zx component   | Domains 1–2 |         |
| spf.srijxy | $0.5*(u_y+v_x)$ | 1/s  | Strain rate tensor, xy component   | Domains 1–2 |         |
| spf.srijyy | $v_y$           | 1/s  | Strain rate tensor, yy component   | Domains 1–2 |         |
| spf.srijzy | $0.5*(w_y+v_z)$ | 1/s  | Strain rate tensor, zy component   | Domains 1–2 |         |
| spf.srijxz | $0.5*(u_z+w_x)$ | 1/s  | Strain rate tensor, xz component   | Domains 1–2 |         |
| spf.srijyz | $0.5*(v_z+w_y)$ | 1/s  | Strain rate tensor, yz component   | Domains 1–2 |         |
| spf.srijzz | $w_z$           | 1/s  | Strain rate tensor, zz component   | Domains 1–2 |         |
| spf.rrijxx | 0               | 1/s  | Rotation rate tensor, xx component | Domains 1–2 |         |
| spf.rrijyx | $0.5*(v_x-u_y)$ | 1/s  | Rotation rate tensor, yx component | Domains 1–2 |         |
| spf.rrijzx | $0.5*(w_x-u_z)$ | 1/s  | Rotation rate tensor, zx component | Domains 1–2 |         |
| spf.rrijxy | $0.5*(u_y-v_x)$ | 1/s  | Rotation rate tensor, xy component | Domains 1–2 |         |
| spf.rrijyy | 0               | 1/s  | Rotation rate tensor, yy component | Domains 1–2 |         |
| spf.rrijzy | $0.5*(w_y-v_z)$ | 1/s  | Rotation rate                      | Domains 1–2 |         |

| Name       | Expression                                                                                                                                           | Unit             | Description                        | Selection   | Details     |
|------------|------------------------------------------------------------------------------------------------------------------------------------------------------|------------------|------------------------------------|-------------|-------------|
|            |                                                                                                                                                      |                  | tensor, zy component               |             |             |
| spf.rrijxz | $0.5*(uz-wx)$                                                                                                                                        | 1/s              | Rotation rate tensor, xz component | Domains 1–2 |             |
| spf.rrijyz | $0.5*(vz-wy)$                                                                                                                                        | 1/s              | Rotation rate tensor, yz component | Domains 1–2 |             |
| spf.rrijzz | 0                                                                                                                                                    | 1/s              | Rotation rate tensor, zz component | Domains 1–2 |             |
| spf.sr     | $\sqrt{2*spf.srijxx^2+2*spf.srijxy^2+2*spf.srijxz^2+2*spf.srijyx^2+2*spf.srijyy^2+2*spf.srijyz^2+2*spf.srijzx^2+2*spf.srijzy^2+2*spf.srijzz^2+eps)}$ | 1/s              | Shear rate                         | Domains 1–2 |             |
| spf.rr     | $\sqrt{2*spf.rrijxx^2+2*spf.rrijxy^2+2*spf.rrijxz^2+2*spf.rrijyx^2+2*spf.rrijyy^2+2*spf.rrijyz^2+2*spf.rrijzx^2+2*spf.rrijzy^2+2*spf.rrijzz^2+eps)}$ | 1/s              | Rotation rate                      | Domains 1–2 |             |
| spf.divu   | $ux+vy+wz$                                                                                                                                           | 1/s              | Divergence of velocity field       | Domains 1–2 |             |
| spf.Fx     | $spf.rho*(u*d(d(x,TIME),X)+v*d(d(y,TIME),X))+w*d(d(z,TIME),X))$                                                                                      | N/m <sup>3</sup> | Volume force, x component          | Domain 2    | + operation |
| spf.Fy     | $spf.rho*(u*d(d(x,TIME),Y)+v*d(d(y,TIME),Y))+w*d(d(z,TIME),Y))$                                                                                      | N/m <sup>3</sup> | Volume force, y component          | Domain 2    | + operation |
| spf.Fz     | $spf.rho*(u*d(d(x,TIME),Z)+v*d(d(y,TIME),Z))+w*d(d(z,TIME),Z))$                                                                                      | N/m <sup>3</sup> | Volume force, z component          | Domain 2    | + operation |
| spf.Fx     | 0                                                                                                                                                    | N/m <sup>3</sup> | Volume force, x component          | Domain 1    | + operation |
| spf.Fy     | 0                                                                                                                                                    | N/m <sup>3</sup> | Volume force, y component          | Domain 1    | + operation |
| spf.Fz     | 0                                                                                                                                                    | N/m <sup>3</sup> | Volume force, z component          | Domain 1    | + operation |
| spf.U      | $\sqrt{u^2+v^2+w^2}$                                                                                                                                 | m/s              | Velocity                           | Domains 1–2 |             |

| Name           | Expression                                                                                                                                                                              | Unit                   | Description                            | Selection        | Details     |
|----------------|-----------------------------------------------------------------------------------------------------------------------------------------------------------------------------------------|------------------------|----------------------------------------|------------------|-------------|
|                |                                                                                                                                                                                         |                        | magnitude                              |                  |             |
| spf.vorticityx | wy-vz                                                                                                                                                                                   | 1/s                    | Vorticity field, x component           | Domains 1–2      |             |
| spf.vorticityy | -wx+uz                                                                                                                                                                                  | 1/s                    | Vorticity field, y component           | Domains 1–2      |             |
| spf.vorticityz | vx-uy                                                                                                                                                                                   | 1/s                    | Vorticity field, z component           | Domains 1–2      |             |
| spf.vort_magn  | $\sqrt{\text{spf.vorticityx}^2 + \text{spf.vorticityy}^2 + \text{spf.vorticityz}^2}$                                                                                                    | 1/s                    | Vorticity magnitude                    | Domains 1–2      |             |
| spf.cellRe     | $0.25 * \text{spf.rho} * \sqrt{\text{emetric\_spatial}(\text{u-d}(x, \text{TIME}), \text{v-d}(y, \text{TIME}), \text{w-d}(z, \text{TIME})) / \text{emetric2\_spatial}} / \text{spf.mu}$ | 1                      | Cell Reynolds number                   | Domains 1–2      |             |
| spf.nu         | $\text{spf.mu} / \text{spf.rho}$                                                                                                                                                        | m <sup>2</sup> /s      | Kinematic viscosity                    | Domains 1–2      |             |
| spf.betaT      | 0                                                                                                                                                                                       | 1/Pa                   | Isothermal compressibility coefficient | Domains 1–2      |             |
| spf.Qm         | 0                                                                                                                                                                                       | kg/(m <sup>3</sup> ·s) | Source term                            | Domains 1–2      | + operation |
| spf.mu_eff     | $\text{spf.mu} + \text{spf.muT}$                                                                                                                                                        | Pa·s                   | Dynamic viscosity                      | Domains 1–2      |             |
| spf.muT        | $\text{nojac}(\max(\text{spf.rho} * \text{spf.lsubstar} * \sqrt{\text{spf.k\_nn}}, 0.5 * \text{spf.mu}))$                                                                               | Pa·s                   | Turbulent dynamic viscosity            | Domains 1–2      |             |
| spf.T_stressx  | $\text{spf.K\_stressx} - p^2 * \text{spf.nxmesh}$                                                                                                                                       | N/m <sup>2</sup>       | Total stress, x component              | Boundaries 1–212 | + operation |
| spf.T_stressy  | $\text{spf.K\_stressy} - p^2 * \text{spf.nymesh}$                                                                                                                                       | N/m <sup>2</sup>       | Total stress, y component              | Boundaries 1–212 | + operation |
| spf.T_stressz  | $\text{spf.K\_stressz} - p^2 * \text{spf.nzmesh}$                                                                                                                                       | N/m <sup>2</sup>       | Total stress, z component              | Boundaries 1–212 | + operation |
| spf.K_stressx  | $\text{spf.mu\_eff} * (2 * \text{ux} * \text{spf.nxmesh} + (\text{uy} + \text{vx}) * \text{spf.nymesh} + (\text{uz} + \text{wx}) * \text{spf.nzmesh})$                                  | N/m <sup>2</sup>       | Viscous stress, x component            | Boundaries 1–212 | + operation |
| spf.K_stressy  | $\text{spf.mu\_eff} * ((\text{vx} + \text{uy}) * \text{spf.nxmesh} + 2 * \text{vy} * \text{spf.nymesh} + (\text{vz} + \text{wy}) * \text{spf.nzmesh})$                                  | N/m <sup>2</sup>       | Viscous stress, y component            | Boundaries 1–212 | + operation |
| spf.K_stressz  | $\text{spf.mu\_eff} * ((\text{wx} + \text{uz}) * \text{spf.nxmesh} + (\text{vy} + \text{vz}) * \text{spf.nymesh} + 2 * \text{wz} * \text{spf.nzmesh})$                                  | N/m <sup>2</sup>       | Viscous stress, z component            | Boundaries 1–212 | + operation |

| Name                           | Expression                                             | Unit             | Description                                    | Selection   | Details     |
|--------------------------------|--------------------------------------------------------|------------------|------------------------------------------------|-------------|-------------|
|                                | spf.nxmesh+(wy+vz)<br>*spf.nymesh+2*wz*s<br>pf.nzmesh) |                  | component                                      | 212         |             |
| spf.K_stress_tenso<br>rxx      | 2*spf.mu_eff*ux                                        | N/m <sup>2</sup> | Viscous stress<br>tensor, xx<br>component      | Domains 1–2 | + operation |
| spf.K_stress_tenso<br>ryx      | spf.mu_eff*(vx+uy)                                     | N/m <sup>2</sup> | Viscous stress<br>tensor, yx<br>component      | Domains 1–2 | + operation |
| spf.K_stress_tenso<br>rzx      | spf.mu_eff*(wx+uz)                                     | N/m <sup>2</sup> | Viscous stress<br>tensor, zx<br>component      | Domains 1–2 | + operation |
| spf.K_stress_tenso<br>rxy      | spf.mu_eff*(uy+vx)                                     | N/m <sup>2</sup> | Viscous stress<br>tensor, xy<br>component      | Domains 1–2 | + operation |
| spf.K_stress_tenso<br>ryy      | 2*spf.mu_eff*vy                                        | N/m <sup>2</sup> | Viscous stress<br>tensor, yy<br>component      | Domains 1–2 | + operation |
| spf.K_stress_tenso<br>rzy      | spf.mu_eff*(wy+vz)                                     | N/m <sup>2</sup> | Viscous stress<br>tensor, zy<br>component      | Domains 1–2 | + operation |
| spf.K_stress_tenso<br>rxz      | spf.mu_eff*(uz+wx)                                     | N/m <sup>2</sup> | Viscous stress<br>tensor, xz<br>component      | Domains 1–2 | + operation |
| spf.K_stress_tenso<br>ryz      | spf.mu_eff*(vz+wy)                                     | N/m <sup>2</sup> | Viscous stress<br>tensor, yz<br>component      | Domains 1–2 | + operation |
| spf.K_stress_tenso<br>rzz      | 2*spf.mu_eff*wz                                        | N/m <sup>2</sup> | Viscous stress<br>tensor, zz<br>component      | Domains 1–2 | + operation |
| spf.K_stress_tenso<br>r_testxx | 2*spf.mu_eff*test(ux)                                  | N/m <sup>2</sup> | Viscous stress<br>tensor test, xx<br>component | Domains 1–2 | + operation |
| spf.K_stress_tenso<br>r_testyx | spf.mu_eff*(test(vx)+<br>test(uy))                     | N/m <sup>2</sup> | Viscous stress<br>tensor test, yx<br>component | Domains 1–2 | + operation |
| spf.K_stress_tenso<br>r_testzx | spf.mu_eff*(test(wx)<br>+test(uz))                     | N/m <sup>2</sup> | Viscous stress<br>tensor test, zx<br>component | Domains 1–2 | + operation |
| spf.K_stress_tenso<br>r_testxy | spf.mu_eff*(test(uy)+<br>test(vx))                     | N/m <sup>2</sup> | Viscous stress<br>tensor test, xy<br>component | Domains 1–2 | + operation |
| spf.K_stress_tenso             | 2*spf.mu_eff*test(vy)                                  | N/m <sup>2</sup> | Viscous stress                                 | Domains 1–2 | + operation |

| Name                       | Expression                                                                                  | Unit                           | Description                              | Selection   | Details     |
|----------------------------|---------------------------------------------------------------------------------------------|--------------------------------|------------------------------------------|-------------|-------------|
| r_testyy                   |                                                                                             |                                | tensor test, yy component                |             |             |
| spf.K_stress_tensor_testzy | spf.mu_eff*(test(wy)+test(vz))                                                              | N/m <sup>2</sup>               | Viscous stress tensor test, zy component | Domains 1–2 | + operation |
| spf.K_stress_tensor_testxz | spf.mu_eff*(test(uz)+test(wx))                                                              | N/m <sup>2</sup>               | Viscous stress tensor test, xz component | Domains 1–2 | + operation |
| spf.K_stress_tensor_testyz | spf.mu_eff*(test(vz)+test(wy))                                                              | N/m <sup>2</sup>               | Viscous stress tensor test, yz component | Domains 1–2 | + operation |
| spf.K_stress_tensor_testzz | 2*spf.mu_eff*test(wz)                                                                       | N/m <sup>2</sup>               | Viscous stress tensor test, zz component | Domains 1–2 | + operation |
| spf.upwind_helpx           | u-d(x,TIME)                                                                                 | m/s                            | Upwind term, x component                 | Domains 1–2 | + operation |
| spf.upwind_helpy           | v-d(y,TIME)                                                                                 | m/s                            | Upwind term, y component                 | Domains 1–2 | + operation |
| spf.upwind_helpz           | w-d(z,TIME)                                                                                 | m/s                            | Upwind term, z component                 | Domains 1–2 | + operation |
| spf.muinit                 | subst(material.mu,spf.fp1.mininput_temperature,spf.Tref,spf.fp1.mininput_pressure,spf.pref) | Pa·s                           | Dynamic viscosity                        | Domains 1–2 | Meta        |
| spf.rhoinit                | spf.rho                                                                                     | kg/m <sup>3</sup>              | Density                                  | Domains 1–2 |             |
| spf.l_mix_lim              | 2*spf.lref                                                                                  | m                              | Mixing length limit                      | Domains 1–2 |             |
| spf.k_pos                  | spf.k_nn+eps                                                                                | m <sup>2</sup> /s <sup>2</sup> | Regularized turbulent kinetic energy     | Domains 1–2 |             |
| spf.ep_nn                  | max(ep2,0)                                                                                  | m <sup>2</sup> /s <sup>3</sup> | Regularized turbulent dissipation rate   | Domains 1–2 |             |
| spf.ep_pos                 | spf.ep_nn+eps                                                                               | m <sup>2</sup> /s <sup>3</sup> |                                          | Domains 1–2 |             |
| spf.Sxx                    | ux                                                                                          | 1/s                            | Strain rate, xx component                | Domains 1–2 | + operation |
| spf.Syx                    | 0.5*(vx+uy)                                                                                 | 1/s                            | Strain rate, yx component                | Domains 1–2 | + operation |
| spf.Szx                    | 0.5*(wx+uz)                                                                                 | 1/s                            | Strain rate, zx component                | Domains 1–2 | + operation |
| spf.Sxy                    | 0.5*(uy+vx)                                                                                 | 1/s                            | Strain rate, xy                          | Domains 1–2 | + operation |

| Name         | Expression                                                                                                                                                                                                                                                                                | Unit                   | Description                                | Selection   | Details     |
|--------------|-------------------------------------------------------------------------------------------------------------------------------------------------------------------------------------------------------------------------------------------------------------------------------------------|------------------------|--------------------------------------------|-------------|-------------|
|              |                                                                                                                                                                                                                                                                                           |                        | component                                  |             |             |
| spf.Syy      | vy                                                                                                                                                                                                                                                                                        | 1/s                    | Strain rate, yy component                  | Domains 1–2 | + operation |
| spf.Szy      | 0.5*(wy+vz)                                                                                                                                                                                                                                                                               | 1/s                    | Strain rate, zy component                  | Domains 1–2 | + operation |
| spf.Sxz      | 0.5*(uz+wx)                                                                                                                                                                                                                                                                               | 1/s                    | Strain rate, xz component                  | Domains 1–2 | + operation |
| spf.Syz      | 0.5*(vz+wy)                                                                                                                                                                                                                                                                               | 1/s                    | Strain rate, yz component                  | Domains 1–2 | + operation |
| spf.Szz      | wz                                                                                                                                                                                                                                                                                        | 1/s                    | Strain rate, zz component                  | Domains 1–2 | + operation |
| spf.AbsS     | $\sqrt{\max(\text{spf.Sxx}^2 + \text{spf.Sxy}^2 + \text{spf.Sxz}^2 + \text{spf.Syx}^2 + \text{spf.Syy}^2 + \text{spf.Syz}^2 + \text{spf.Szx}^2 + \text{spf.Szy}^2 + \text{spf.Szz}^2, 0)}$                                                                                                | 1/s                    | Absolute strain rate                       | Domains 1–2 |             |
| spf.rF       | $\sqrt{1/6}/\max(\text{spf.AbsS}, \text{eps})$                                                                                                                                                                                                                                            | s                      | Help variable                              | Domains 1–2 |             |
| spf.rFInv    | $\sqrt{6} * \text{spf.AbsS}$                                                                                                                                                                                                                                                              | 1/s                    | Help variable                              | Domains 1–2 |             |
| spf.lcore    | $\min(\text{spf.C\_mu} * \text{spf.k\_nn}^{1.5} / \text{spf.ep\_pos}, \sqrt{\text{spf.k\_nn}} * \text{spf.rF})$                                                                                                                                                                           | m                      | Help variable                              | Domains 1–2 |             |
| spf.lsubstar | $\text{nojac}(\min(\text{spf.lcore}, \text{spf.l\_mix\_lim}))$                                                                                                                                                                                                                            | m                      | Limited mixing length                      | Domains 1–2 |             |
| spf.nuT      | $\text{spf.muT} / \text{spf.rho}$                                                                                                                                                                                                                                                         | m <sup>2</sup> /s      | Turbulent kinematic viscosity              | Domains 1–2 |             |
| spf.linSCK   | $-\text{spf.rho} * (\text{spf.gammaT} - \min(\text{spf.Pkb\_mul}, 0) / \max(\text{spf.rho}, \text{eps}))$                                                                                                                                                                                 | kg/(m <sup>3</sup> ·s) | Linear source term coefficient, k-equation | Domains 1–2 |             |
| spf.linSCeps | $-\text{spf.rho} * (\text{spf.Ceps2} * \text{spf.gammaT} - \min(\text{spf.Pepb\_mul}, 0) / \max(\text{spf.rho}, \text{eps}))$                                                                                                                                                             | kg/(m <sup>3</sup> ·s) | Linear source term coefficient             | Domains 1–2 |             |
| spf.PCore    | $2 * \text{ux}^2 + \text{uy} * (\text{uy} + \text{vx}) + \text{uz} * (\text{uz} + \text{wx}) + \text{vx} * (\text{uy} + \text{vx}) + 2 * \text{vy}^2 + \text{vz} * (\text{vz} + \text{wy}) + \text{wx} * (\text{uz} + \text{wx}) + \text{wy} * (\text{vz} + \text{wy}) + 2 * \text{wz}^2$ | 1/s <sup>2</sup>       | Turbulent kinetic energy source term       | Domains 1–2 | + operation |

| Name          | Expression                                                                          | Unit                           | Description                                              | Selection   | Details     |
|---------------|-------------------------------------------------------------------------------------|--------------------------------|----------------------------------------------------------|-------------|-------------|
| spf.Pk        | nojac(max(spf.muT*spf.PCore,0))+nojac(max(spf.Pkb_mul,0)*k2)                        | W/m <sup>3</sup>               | Turbulent kinetic energy source term                     | Domains 1–2 |             |
| spf.Peps      | nojac(max(spf.Ceps1*spf.gammaT*spf.muT*spf.PCore,0))+nojac(max(spf.Pepb_mul,0)*ep2) | Pa/s <sup>2</sup>              |                                                          | Domains 1–2 |             |
| spf.kinit     | (10*spf.muinit/(spf.rho*init*spf.l_mix_lim))^2                                      | m <sup>2</sup> /s <sup>2</sup> | Turbulent kinetic energy                                 | Domains 1–2 |             |
| spf.epinit    | 10*spf.C_mu*spf.kinit^1.5/spf.l_mix_lim                                             | m <sup>2</sup> /s <sup>3</sup> | Turbulent dissipation rate                               | Domains 1–2 |             |
| spf.gammaT    | nojac(spf.C_mu*spf.rho*spf.k_nn/spf.muT)                                            | 1/s                            | Turbulence help variable                                 | Domains 1–2 |             |
| spf.tauT      | spf.muT/nojac(spf.C_mu*spf.rho*spf.k_pos)                                           | s                              | Turbulence time scale                                    | Domains 1–2 |             |
| spf.ep_global | ep2                                                                                 | m <sup>2</sup> /s <sup>3</sup> | Turbulent dissipation rate, (all cells)                  | Domains 1–2 |             |
| spf.Pkb       | spf.Pkb_mul*k2                                                                      | W/m <sup>3</sup>               | Buoyancy-induced production of turbulence kinetic energy | Domains 1–2 | + operation |
| spf.Pkb_mul   | 0                                                                                   | kg/(m <sup>3</sup> .s)         | Help variable                                            | Domains 1–2 | + operation |
| spf.Pepb_mul  | 0                                                                                   | kg/(m <sup>3</sup> .s)         | Help variable                                            | Domains 1–2 | + operation |
| k2xt          | k2xTIME-k2xx*d(x,TIME)-k2xy*d(y,TIME)-k2xz*d(z,TIME)                                | m/s <sup>3</sup>               | Gradient of k2, x component, first time derivative       | Domains 1–2 |             |
| k2yt          | k2yTIME-k2yx*d(x,TIME)-k2yy*d(y,TIME)-k2yz*d(z,TIME)                                | m/s <sup>3</sup>               | Gradient of k2, y component, first time derivative       | Domains 1–2 |             |
| k2zt          | k2zTIME-k2zx*d(x,TIME)-k2zy*d(y,TIME)-k2zz*d(z,TIME)                                | m/s <sup>3</sup>               | Gradient of k2, z component, first time derivative       | Domains 1–2 |             |
| k2xtt         | d(k2xTIME-                                                                          | m/s <sup>4</sup>               | Gradient of k2, x                                        | Domains 1–2 |             |

| Name  | Expression                                                                                                                                                                                                                                                                                                                                                                                                                                                                                                                                                                                                                                                                                           | Unit             | Description                                         | Selection   | Details |
|-------|------------------------------------------------------------------------------------------------------------------------------------------------------------------------------------------------------------------------------------------------------------------------------------------------------------------------------------------------------------------------------------------------------------------------------------------------------------------------------------------------------------------------------------------------------------------------------------------------------------------------------------------------------------------------------------------------------|------------------|-----------------------------------------------------|-------------|---------|
|       | $k_{2xx} \frac{d}{dt}(x, \text{TIME}) - k_{2xy} \frac{d}{dt}(y, \text{TIME}) - k_{2xz} \frac{d}{dt}(z, \text{TIME}), \text{TIME})$<br>$-d(k_{2x} \text{TIME} - k_{2xx} \frac{d}{dt}(x, \text{TIME}) - k_{2xy} \frac{d}{dt}(y, \text{TIME}) - k_{2xz} \frac{d}{dt}(z, \text{TIME}), x) \frac{d}{dt}(x, \text{TIME}) - d(k_{2x} \text{TIME} - k_{2xx} \frac{d}{dt}(x, \text{TIME}) - k_{2xy} \frac{d}{dt}(y, \text{TIME}) - k_{2xz} \frac{d}{dt}(z, \text{TIME}), y) \frac{d}{dt}(y, \text{TIME}) - d(k_{2x} \text{TIME} - k_{2xx} \frac{d}{dt}(x, \text{TIME}) - k_{2xy} \frac{d}{dt}(y, \text{TIME}) - k_{2xz} \frac{d}{dt}(z, \text{TIME}), z) \frac{d}{dt}(z, \text{TIME})$                        |                  | component, second time derivative                   |             |         |
| k2ytt | $d(k_{2y} \text{TIME} - k_{2yx} \frac{d}{dt}(x, \text{TIME}) - k_{2yy} \frac{d}{dt}(y, \text{TIME}) - k_{2yz} \frac{d}{dt}(z, \text{TIME}), \text{TIME})$<br>$-d(k_{2y} \text{TIME} - k_{2yx} \frac{d}{dt}(x, \text{TIME}) - k_{2yy} \frac{d}{dt}(y, \text{TIME}) - k_{2yz} \frac{d}{dt}(z, \text{TIME}), x) \frac{d}{dt}(x, \text{TIME}) - d(k_{2y} \text{TIME} - k_{2yx} \frac{d}{dt}(x, \text{TIME}) - k_{2yy} \frac{d}{dt}(y, \text{TIME}) - k_{2yz} \frac{d}{dt}(z, \text{TIME}), y) \frac{d}{dt}(y, \text{TIME}) - d(k_{2y} \text{TIME} - k_{2yx} \frac{d}{dt}(x, \text{TIME}) - k_{2yy} \frac{d}{dt}(y, \text{TIME}) - k_{2yz} \frac{d}{dt}(z, \text{TIME}), z) \frac{d}{dt}(z, \text{TIME})$ | m/s <sup>4</sup> | Gradient of k2, y component, second time derivative | Domains 1–2 |         |
| k2ztt | $d(k_{2z} \text{TIME} - k_{2zx} \frac{d}{dt}(x, \text{TIME}) - k_{2zy} \frac{d}{dt}(y, \text{TIME}) - k_{2zz} \frac{d}{dt}(z, \text{TIME}), \text{TIME})$<br>$-d(k_{2z} \text{TIME} - k_{2zx} \frac{d}{dt}(x, \text{TIME}) - k_{2zy} \frac{d}{dt}(y, \text{TIME}) - k_{2zz} \frac{d}{dt}(z, \text{TIME}), x) \frac{d}{dt}(x, \text{TIME}) - d(k_{2z} \text{TIME} - k_{2zx} \frac{d}{dt}(x, \text{TIME}) - k_{2zy} \frac{d}{dt}(y, \text{TIME}) - k_{2zz} \frac{d}{dt}(z, \text{TIME}), y) \frac{d}{dt}(y, \text{TIME}) - d(k_{2z} \text{TIME} - k_{2zx} \frac{d}{dt}(x, \text{TIME}) - k_{2zy} \frac{d}{dt}(y, \text{TIME}) - k_{2zz} \frac{d}{dt}(z, \text{TIME}), z) \frac{d}{dt}(z, \text{TIME})$ | m/s <sup>4</sup> | Gradient of k2, z component, second time derivative | Domains 1–2 |         |



| Name   | Expression                                                                                                                                                                                                                                                                                                                                                                                            | Unit      | Description                                          | Selection   | Details |
|--------|-------------------------------------------------------------------------------------------------------------------------------------------------------------------------------------------------------------------------------------------------------------------------------------------------------------------------------------------------------------------------------------------------------|-----------|------------------------------------------------------|-------------|---------|
|        | $k2zy \cdot d(y, TIME) - k2zz \cdot d(z, TIME), z) \cdot d(z, TIME)$                                                                                                                                                                                                                                                                                                                                  |           |                                                      |             |         |
| k2t    | $k2TIME - k2x \cdot d(x, TIME) - k2y \cdot d(y, TIME) - k2z \cdot d(z, TIME)$                                                                                                                                                                                                                                                                                                                         | $m^2/s^3$ | Turbulent kinetic energy, first time derivative      | Domains 1–2 |         |
| k2tt   | $d(k2TIME - k2x \cdot d(x, TIME) - k2y \cdot d(y, TIME) - k2z \cdot d(z, TIME), TIME) - d(k2TIME - k2x \cdot d(x, TIME) - k2y \cdot d(y, TIME) - k2z \cdot d(z, TIME), x) \cdot d(x, TIME) - d(k2TIME - k2x \cdot d(x, TIME) - k2y \cdot d(y, TIME) - k2z \cdot d(z, TIME), y) \cdot d(y, TIME) - d(k2TIME - k2x \cdot d(x, TIME) - k2y \cdot d(y, TIME) - k2z \cdot d(z, TIME), z) \cdot d(z, TIME)$ | $m^2/s^4$ | Turbulent kinetic energy, second time derivative     | Domains 1–2 |         |
| ep2xt  | $ep2xTIME - ep2xx \cdot d(x, TIME) - ep2xy \cdot d(y, TIME) - ep2xz \cdot d(z, TIME)$                                                                                                                                                                                                                                                                                                                 | $m/s^4$   | Gradient of ep2, x component, first time derivative  | Domains 1–2 |         |
| ep2yt  | $ep2yTIME - ep2yx \cdot d(x, TIME) - ep2yy \cdot d(y, TIME) - ep2yz \cdot d(z, TIME)$                                                                                                                                                                                                                                                                                                                 | $m/s^4$   | Gradient of ep2, y component, first time derivative  | Domains 1–2 |         |
| ep2zt  | $ep2zTIME - ep2zx \cdot d(x, TIME) - ep2zy \cdot d(y, TIME) - ep2zz \cdot d(z, TIME)$                                                                                                                                                                                                                                                                                                                 | $m/s^4$   | Gradient of ep2, z component, first time derivative  | Domains 1–2 |         |
| ep2xtt | $d(ep2xTIME - ep2xx \cdot d(x, TIME) - ep2xy \cdot d(y, TIME) - ep2xz \cdot d(z, TIME), TIME) - d(ep2xTIME - ep2xx \cdot d(x, TIME) - ep2xy \cdot d(y, TIME) - ep2xz \cdot d(z, TIME), x) \cdot d(x, TIME) - d(ep2xTIME -$                                                                                                                                                                            | $m/s^5$   | Gradient of ep2, x component, second time derivative | Domains 1–2 |         |

| Name   | Expression                                                                                                                                                                                                                                                                                                                                                                                                                                                                                                                                                                                                                                                                                                                                                                                         | Unit             | Description                                          | Selection   | Details |
|--------|----------------------------------------------------------------------------------------------------------------------------------------------------------------------------------------------------------------------------------------------------------------------------------------------------------------------------------------------------------------------------------------------------------------------------------------------------------------------------------------------------------------------------------------------------------------------------------------------------------------------------------------------------------------------------------------------------------------------------------------------------------------------------------------------------|------------------|------------------------------------------------------|-------------|---------|
|        | $\begin{aligned} & \text{ep2xx} \cdot d(x, \text{TIME}) - \\ & \text{ep2xy} \cdot d(y, \text{TIME}) - \\ & \text{ep2xz} \cdot d(z, \text{TIME}), y) \cdot d \\ & (y, \text{TIME}) - \\ & d(\text{ep2xTIME} - \\ & \text{ep2xx} \cdot d(x, \text{TIME}) - \\ & \text{ep2xy} \cdot d(y, \text{TIME}) - \\ & \text{ep2xz} \cdot d(z, \text{TIME}), z) \cdot d \\ & (z, \text{TIME}) \end{aligned}$                                                                                                                                                                                                                                                                                                                                                                                                    |                  |                                                      |             |         |
| ep2ytt | $\begin{aligned} & d(\text{ep2yTIME} - \\ & \text{ep2yx} \cdot d(x, \text{TIME}) - \\ & \text{ep2yy} \cdot d(y, \text{TIME}) - \\ & \text{ep2yz} \cdot d(z, \text{TIME}), \text{TIME}) - \\ & d(\text{ep2yTIME} - \\ & \text{ep2yx} \cdot d(x, \text{TIME}) - \\ & \text{ep2yy} \cdot d(y, \text{TIME}) - \\ & \text{ep2yz} \cdot d(z, \text{TIME}), x) \cdot d \\ & (x, \text{TIME}) - \\ & d(\text{ep2yTIME} - \\ & \text{ep2yx} \cdot d(x, \text{TIME}) - \\ & \text{ep2yy} \cdot d(y, \text{TIME}) - \\ & \text{ep2yz} \cdot d(z, \text{TIME}), y) \cdot d \\ & (y, \text{TIME}) - \\ & d(\text{ep2yTIME} - \\ & \text{ep2yx} \cdot d(x, \text{TIME}) - \\ & \text{ep2yy} \cdot d(y, \text{TIME}) - \\ & \text{ep2yz} \cdot d(z, \text{TIME}), z) \cdot d \\ & (z, \text{TIME}) \end{aligned}$ | m/s <sup>5</sup> | Gradient of ep2, y component, second time derivative | Domains 1–2 |         |
| ep2ztt | $\begin{aligned} & d(\text{ep2zTIME} - \\ & \text{ep2zx} \cdot d(x, \text{TIME}) - \\ & \text{ep2zy} \cdot d(y, \text{TIME}) - \\ & \text{ep2zz} \cdot d(z, \text{TIME}), \text{TIME}) - \\ & d(\text{ep2zTIME} - \\ & \text{ep2zx} \cdot d(x, \text{TIME}) - \\ & \text{ep2zy} \cdot d(y, \text{TIME}) - \\ & \text{ep2zz} \cdot d(z, \text{TIME}), x) \cdot d \\ & (x, \text{TIME}) - \\ & d(\text{ep2zTIME} - \\ & \text{ep2zx} \cdot d(x, \text{TIME}) - \\ & \text{ep2zy} \cdot d(y, \text{TIME}) - \\ & \text{ep2zz} \cdot d(z, \text{TIME}), y) \cdot d \\ & (y, \text{TIME}) - \\ & d(\text{ep2zTIME} - \\ & \text{ep2zx} \cdot d(x, \text{TIME}) - \\ & \text{ep2zy} \cdot d(y, \text{TIME}) - \\ & \text{ep2zz} \cdot d(z, \text{TIME}), z) \cdot d \\ & (z, \text{TIME}) \end{aligned}$ | m/s <sup>5</sup> | Gradient of ep2, z component, second time derivative | Domains 1–2 |         |

| Name         | Expression                                                                                                                                                                                                                                                                                                                               | Unit                           | Description                                                 | Selection   | Details     |
|--------------|------------------------------------------------------------------------------------------------------------------------------------------------------------------------------------------------------------------------------------------------------------------------------------------------------------------------------------------|--------------------------------|-------------------------------------------------------------|-------------|-------------|
| ep2t         | ep2TIME-<br>ep2x*d(x,TIME)-<br>ep2y*d(y,TIME)-<br>ep2z*d(z,TIME)                                                                                                                                                                                                                                                                         | m <sup>2</sup> /s <sup>4</sup> | Turbulent<br>dissipation rate,<br>first time<br>derivative  | Domains 1–2 |             |
| ep2tt        | d(ep2TIME-<br>ep2x*d(x,TIME)-<br>ep2y*d(y,TIME)-<br>ep2z*d(z,TIME),TIME)<br>-d(ep2TIME-<br>ep2x*d(x,TIME)-<br>ep2y*d(y,TIME)-<br>ep2z*d(z,TIME),x)*d(<br>x,TIME)-d(ep2TIME-<br>ep2x*d(x,TIME)-<br>ep2y*d(y,TIME)-<br>ep2z*d(z,TIME),y)*d(<br>y,TIME)-d(ep2TIME-<br>ep2x*d(x,TIME)-<br>ep2y*d(y,TIME)-<br>ep2z*d(z,TIME),z)*d(z<br>,TIME) | m <sup>2</sup> /s <sup>5</sup> | Turbulent<br>dissipation rate,<br>second time<br>derivative | Domains 1–2 |             |
| spf.tau_vdxx | 2*spf.srijxx*(spf.mu+<br>spf.muT)                                                                                                                                                                                                                                                                                                        | Pa                             | Viscous stress<br>tensor, xx<br>component                   | Domains 1–2 | + operation |
| spf.tau_vdyx | 2*spf.srijyx*(spf.mu+<br>spf.muT)                                                                                                                                                                                                                                                                                                        | Pa                             | Viscous stress<br>tensor, yx<br>component                   | Domains 1–2 | + operation |
| spf.tau_vdzx | 2*spf.srijzx*(spf.mu+<br>spf.muT)                                                                                                                                                                                                                                                                                                        | Pa                             | Viscous stress<br>tensor, zx<br>component                   | Domains 1–2 | + operation |
| spf.tau_vdxy | 2*spf.srijxy*(spf.mu+<br>spf.muT)                                                                                                                                                                                                                                                                                                        | Pa                             | Viscous stress<br>tensor, xy<br>component                   | Domains 1–2 | + operation |
| spf.tau_vdyy | 2*spf.srijyy*(spf.mu+<br>spf.muT)                                                                                                                                                                                                                                                                                                        | Pa                             | Viscous stress<br>tensor, yy<br>component                   | Domains 1–2 | + operation |
| spf.tau_vdzy | 2*spf.srijzy*(spf.mu+<br>spf.muT)                                                                                                                                                                                                                                                                                                        | Pa                             | Viscous stress<br>tensor, zy<br>component                   | Domains 1–2 | + operation |
| spf.tau_vdxz | 2*spf.srijxz*(spf.mu+<br>spf.muT)                                                                                                                                                                                                                                                                                                        | Pa                             | Viscous stress<br>tensor, xz<br>component                   | Domains 1–2 | + operation |
| spf.tau_vdyz | 2*spf.srijyz*(spf.mu+<br>spf.muT)                                                                                                                                                                                                                                                                                                        | Pa                             | Viscous stress<br>tensor, yz                                | Domains 1–2 | + operation |

| Name                   | Expression                                                                                                                                                                                                                                                        | Unit                   | Description                         | Selection   | Details     |
|------------------------|-------------------------------------------------------------------------------------------------------------------------------------------------------------------------------------------------------------------------------------------------------------------|------------------------|-------------------------------------|-------------|-------------|
|                        |                                                                                                                                                                                                                                                                   |                        | component                           |             |             |
| spf.tau_vdzz           | $2 * \text{spf.srijzz} * (\text{spf.mu} + \text{spf.muT})$                                                                                                                                                                                                        | Pa                     | Viscous stress tensor, zz component | Domains 1–2 | + operation |
| spf.Qvd                | $\text{spf.tau\_vdx} * u_x + \text{spf.tau\_vdy} * u_y + \text{spf.tau\_vdxz} * u_z + \text{spf.tau\_vdyx} * v_x + \text{spf.tau\_vdy} * v_y + \text{spf.tau\_vdyz} * v_z + \text{spf.tau\_vdxz} * w_x + \text{spf.tau\_vdyz} * w_y + \text{spf.tau\_vdzz} * w_z$ | W/m <sup>3</sup>       | Viscous dissipation                 | Domains 1–2 | + operation |
| spf.epsilon_p          | 1                                                                                                                                                                                                                                                                 | 1                      | Porosity                            | Domains 1–2 |             |
| spf.Fst_tensorxx       | 0                                                                                                                                                                                                                                                                 | N/m <sup>2</sup>       | Surface tension force, xx component | Domains 1–2 | + operation |
| spf.Fst_tensoryx       | 0                                                                                                                                                                                                                                                                 | N/m <sup>2</sup>       | Surface tension force, yx component | Domains 1–2 | + operation |
| spf.Fst_tensorzx       | 0                                                                                                                                                                                                                                                                 | N/m <sup>2</sup>       | Surface tension force, zx component | Domains 1–2 | + operation |
| spf.Fst_tensorxy       | 0                                                                                                                                                                                                                                                                 | N/m <sup>2</sup>       | Surface tension force, xy component | Domains 1–2 | + operation |
| spf.Fst_tensoryy       | 0                                                                                                                                                                                                                                                                 | N/m <sup>2</sup>       | Surface tension force, yy component | Domains 1–2 | + operation |
| spf.Fst_tensorzy       | 0                                                                                                                                                                                                                                                                 | N/m <sup>2</sup>       | Surface tension force, zy component | Domains 1–2 | + operation |
| spf.Fst_tensorxz       | 0                                                                                                                                                                                                                                                                 | N/m <sup>2</sup>       | Surface tension force, xz component | Domains 1–2 | + operation |
| spf.Fst_tensoryz       | 0                                                                                                                                                                                                                                                                 | N/m <sup>2</sup>       | Surface tension force, yz component | Domains 1–2 | + operation |
| spf.Fst_tensorzz       | 0                                                                                                                                                                                                                                                                 | N/m <sup>2</sup>       | Surface tension force, zz component | Domains 1–2 | + operation |
| spf.continuityEquation | $\text{spf.rho} * \text{spf.divu}$                                                                                                                                                                                                                                | kg/(m <sup>3</sup> ·s) | Continuity equation                 | Domains 1–2 |             |
| spf.contCoeff          | spf.rho                                                                                                                                                                                                                                                           | kg/m <sup>3</sup>      | Help variable                       | Domains 1–2 |             |

| Name       | Expression                                                                                                                                                                                                                                                                                                                                                                                                                                                                                                                                                                                                          | Unit              | Description                                  | Selection   | Details |
|------------|---------------------------------------------------------------------------------------------------------------------------------------------------------------------------------------------------------------------------------------------------------------------------------------------------------------------------------------------------------------------------------------------------------------------------------------------------------------------------------------------------------------------------------------------------------------------------------------------------------------------|-------------------|----------------------------------------------|-------------|---------|
| spf.lref   | 0.032587500000000005                                                                                                                                                                                                                                                                                                                                                                                                                                                                                                                                                                                                | m                 | Reference length                             | Domains 1–2 |         |
| spf.res_k  | $\begin{aligned} & \text{spf.rho} * (\text{k2TIME} - \text{k2x} * \text{d}(\text{x}, \text{TIME}) - \text{k2y} * \text{d}(\text{y}, \text{TIME}) - \text{k2z} * \text{d}(\text{z}, \text{TIME})) - \\ & (\text{spf.mu} + \text{spf.muT} / \text{spf} \\ & \text{.sigmak}) * (\text{k2xx} + \text{k2yy} + \text{k2zz}) + \text{spf.rho} * \text{u} * \text{k2} \\ & \text{x} + \text{spf.rho} * \text{v} * \text{k2y} + \text{spf} \\ & \text{.rho} * \text{w} * \text{k2z} - \text{spf.linSCk} * \text{k2} - \text{spf.Pk} \end{aligned}$                                                                           | W/m <sup>3</sup>  | Turbulent kinetic energy equation residual   | Domains 1–2 |         |
| spf.res_ep | $\begin{aligned} & \text{spf.rho} * (\text{ep2TIME} - \text{ep2x} * \text{d}(\text{x}, \text{TIME}) - \text{ep2y} * \text{d}(\text{y}, \text{TIME}) - \text{ep2z} * \text{d}(\text{z}, \text{TIME})) - \\ & (\text{spf.mu} + \text{spf.muT} / \text{spf} \\ & \text{.sigmaeps}) * (\text{ep2xx} + \text{ep2yy} + \text{ep2zz}) + \text{spf.rho} * \text{u} * \text{ep2x} + \text{spf.rho} * \text{v} * \text{ep2y} + \text{spf.rho} * \text{w} * \text{ep2z} - \text{spf.linSCeps} * \text{ep2} - \text{spf.Peps} \end{aligned}$                                                                                    | Pa/s <sup>2</sup> | Turbulent dissipation rate equation residual | Domains 1–2 |         |
| spf.res_u  | $\begin{aligned} & \text{spf.rho} * (\text{uTIME} - \text{d}(\text{u}, \text{x}) * \text{d}(\text{x}, \text{TIME}) - \text{d}(\text{u}, \text{y}) * \text{d}(\text{y}, \text{TIME}) - \text{d}(\text{u}, \text{z}) * \text{d}(\text{z}, \text{TIME})) + \text{p2x} + \text{spf.rho} * \text{u} * \text{ux} + \text{spf.rho} * \text{v} * \text{uy} + \text{spf.rho} * \text{w} * \text{uz} - \\ & (\text{d}(2 * \text{ux}, \text{x}) + \text{d}(\text{uy} + \text{vx}, \text{y}) + \text{d}(\text{uz} + \text{wx}, \text{z})) * (\text{spf.mu} + \text{spf.muT}) - \text{spf.Fx} - \text{spf.Fgtotx} \end{aligned}$ | N/m <sup>3</sup>  | Equation residual                            | Domains 1–2 |         |
| spf.res_v  | $\begin{aligned} & \text{spf.rho} * (\text{vTIME} - \text{d}(\text{v}, \text{x}) * \text{d}(\text{x}, \text{TIME}) - \text{d}(\text{v}, \text{y}) * \text{d}(\text{y}, \text{TIME}) - \text{d}(\text{v}, \text{z}) * \text{d}(\text{z}, \text{TIME})) + \text{spf.rho} * \text{u} * \text{vx} + \text{p2y} + \text{spf.rho} * \text{v} * \text{vy} + \text{spf.rho} * \text{w} * \text{vz} - \\ & (\text{d}(\text{vx} + \text{uy}, \text{x}) + \text{d}(2 * \text{vy}, \text{y}) + \text{d}(\text{vz} + \text{wy}, \text{z})) * (\text{spf.mu} + \text{spf.muT}) - \text{spf.Fy} - \text{spf.Fgtoty} \end{aligned}$ | N/m <sup>3</sup>  | Equation residual                            | Domains 1–2 |         |
| spf.res_w  | spf.rho*(wTIME-                                                                                                                                                                                                                                                                                                                                                                                                                                                                                                                                                                                                     | N/m <sup>3</sup>  | Equation residual                            | Domains 1–2 |         |

| Name      | Expression                                                                                                                                                                  | Unit                   | Description                | Selection   | Details |
|-----------|-----------------------------------------------------------------------------------------------------------------------------------------------------------------------------|------------------------|----------------------------|-------------|---------|
|           | $d(w,x)*d(x,TIME)-d(w,y)*d(y,TIME)-d(w,z)*d(z,TIME))+spf.f.rho*u*wx+spf.f.rho*v*wy+p2z+spf.f.rho*w*wz-(d(wx+uz,x)+d(wy+vz,y)+d(2*wz,z))*(spf.mu+spf.muT)-spf.Fz-sp.f.gtotz$ |                        |                            |             |         |
| spf.res_p | spf.rho*spf.divu                                                                                                                                                            | kg/(m <sup>3</sup> ·s) | Pressure equation residual | Domains 1–2 |         |

### Shape functions

| Name | Shape function    | Unit                           | Description                 | Shape frame | Selection   |
|------|-------------------|--------------------------------|-----------------------------|-------------|-------------|
| u    | Lagrange (Linear) | m/s                            | Velocity field, x component | Spatial     | Domains 1–2 |
| v    | Lagrange (Linear) | m/s                            | Velocity field, y component | Spatial     | Domains 1–2 |
| w    | Lagrange (Linear) | m/s                            | Velocity field, z component | Spatial     | Domains 1–2 |
| p2   | Lagrange (Linear) | Pa                             | Pressure                    | Spatial     | Domains 1–2 |
| k2   | Lagrange (Linear) | m <sup>2</sup> /s <sup>2</sup> | Turbulent kinetic energy    | Spatial     | Domains 1–2 |
| ep2  | Lagrange (Linear) | m <sup>2</sup> /s <sup>3</sup> | Turbulent dissipation rate  | Spatial     | Domains 1–2 |

### Weak expressions

| Weak expression                                                                                                                                                                                                                                                                                  | Integration order | Integration frame | Selection   |
|--------------------------------------------------------------------------------------------------------------------------------------------------------------------------------------------------------------------------------------------------------------------------------------------------|-------------------|-------------------|-------------|
| $spf.f.rho*(-(uTIME-ux*d(x,TIME)-uy*d(y,TIME)-uz*d(z,TIME))*test(u)-(vTIME-vx*d(x,TIME)-vy*d(y,TIME)-vz*d(z,TIME))*test(v)-(wTIME-wx*d(x,TIME)-wy*d(y,TIME)-wz*d(z,TIME))*test(w))$                                                                                                              | 2                 | Spatial           | Domains 1–2 |
| $(p2-sp.f.K\_stress\_tensorxx)*test(ux)-sp.f.K\_stress\_tensorxy*test(uy)-sp.f.K\_stress\_tensorxz*test(uz)-sp.f.K\_stress\_tensoryx*test(vx)+(p2-sp.f.K\_stress\_tensoryy)*test(vy)-sp.f.K\_stress\_tensoryz*test(vz)-sp.f.K\_stress\_tensorzx*test(wx)-sp.f.K\_stress\_tensorzy*test(wy)+(p2-$ | 2                 | Spatial           | Domains 1–2 |

| Weak expression                                                                                                                                                                                                                                                      | Integration order | Integration frame | Selection   |
|----------------------------------------------------------------------------------------------------------------------------------------------------------------------------------------------------------------------------------------------------------------------|-------------------|-------------------|-------------|
| spf.K_stress_tensorzz)*test(wz)                                                                                                                                                                                                                                      |                   |                   |             |
| spf.Fx*test(u)+spf.Fy*test(v)+spf.Fz*test(w)                                                                                                                                                                                                                         | 2                 | Spatial           | Domains 1–2 |
| spf.rho*(-<br>(d(u,x)*u+d(u,y)*v+d(u,z)*w)*test(u)-<br>(d(v,x)*u+d(v,y)*v+d(v,z)*w)*test(v)-<br>(d(w,x)*u+d(w,y)*v+d(w,z)*w)*test(w))                                                                                                                                | 2                 | Spatial           | Domains 1–2 |
| -spf.continuityEquation*test(p2)                                                                                                                                                                                                                                     | 2                 | Spatial           | Domains 1–2 |
| -<br>test(k2x)*(spf.mu+spf.muT/spf.sigma)<br>ak)*k2x-<br>test(k2y)*(spf.mu+spf.muT/spf.sigma)<br>ak)*k2y-<br>test(k2z)*(spf.mu+spf.muT/spf.sigma)<br>ak)*k2z-<br>spf.rho*(u*k2x+v*k2y+w*k2z)*test(k2)+<br>spf.Pk*test(k2)+spf.linSCk*k2*test(k2)                     | 2                 | Spatial           | Domains 1–2 |
| -spf.rho*(k2TIME-k2x*d(x,TIME)-<br>k2y*d(y,TIME)-<br>k2z*d(z,TIME))*test(k2)                                                                                                                                                                                         | 2                 | Spatial           | Domains 1–2 |
| -(k2-<br>nojac(k2))*(spf.usePseudoTimeStepping>0)*<br>spf.rho*spf.tsti*test(k2)                                                                                                                                                                                      | 2                 | Spatial           | Domains 1–2 |
| -<br>test(ep2x)*(spf.mu+spf.muT/spf.sigma)<br>eps)*ep2x-<br>test(ep2y)*(spf.mu+spf.muT/spf.sigma)<br>eps)*ep2y-<br>test(ep2z)*(spf.mu+spf.muT/spf.sigma)<br>eps)*ep2z-<br>spf.rho*(u*ep2x+v*ep2y+w*ep2z)*test(ep2)+<br>spf.Peps*test(ep2)+spf.linSCeps*ep2*test(ep2) | 2                 | Spatial           | Domains 1–2 |
| -spf.rho*(ep2TIME-ep2x*d(x,TIME)-<br>ep2y*d(y,TIME)-<br>ep2z*d(z,TIME))*test(ep2)                                                                                                                                                                                    | 2                 | Spatial           | Domains 1–2 |
| -(ep2-<br>nojac(ep2))*(spf.usePseudoTimeStepping>0)*<br>spf.rho*spf.tsti*test(ep2)                                                                                                                                                                                   | 2                 | Spatial           | Domains 1–2 |
| -spf.crosswindep-spf.crosswindk                                                                                                                                                                                                                                      | 2                 | Spatial           | Domains 1–2 |
| spf.streamlinek                                                                                                                                                                                                                                                      | 2                 | Spatial           | Domains 1–2 |

| Weak expression                                                                                                  | Integration order | Integration frame | Selection   |
|------------------------------------------------------------------------------------------------------------------|-------------------|-------------------|-------------|
| spf.streamlineep                                                                                                 | 2                 | Spatial           | Domains 1–2 |
| spf.streamlinens                                                                                                 | 2                 | Spatial           | Domains 1–2 |
| spf.crosswindns                                                                                                  | 2                 | Spatial           | Domains 1–2 |
| (spf.usePseudoTimeStepping>0)*spf.rho*spf.tsti*(-(u-nojac(u))*test(u)-(v-nojac(v))*test(v)-(w-nojac(w))*test(w)) | 2                 | Spatial           | Domains 1–2 |

2.4.4 Initial Values 1

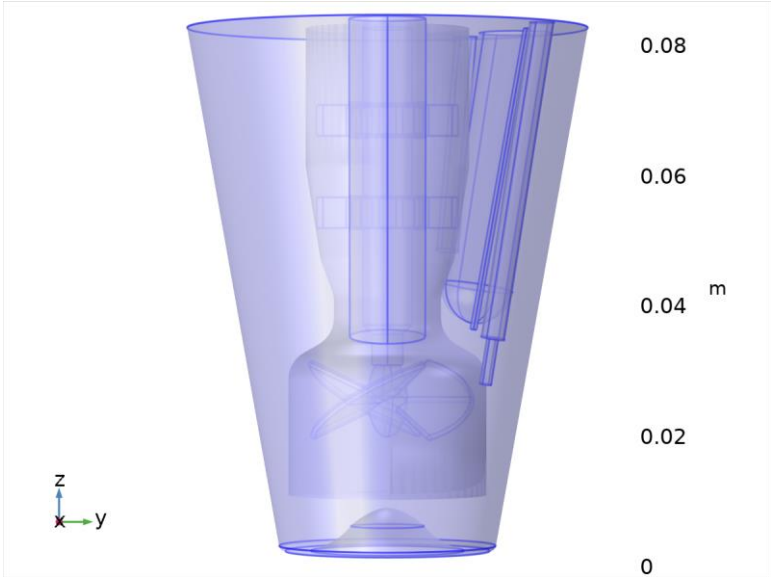

Initial Values 1

SELECTION

|                        |                                          |
|------------------------|------------------------------------------|
| Geometric entity level | Domain                                   |
| Selection              | Geometry geom1: Dimension 3: All domains |

EQUATIONS

$$\begin{aligned} \rho_{\text{init}} &= \rho + \rho_{\text{hydro}} \\ \rho_{\text{hydro}} &= \rho_{\text{ref}} \mathbf{g} \cdot (\mathbf{r} - \mathbf{r}_{\text{ref}}) \end{aligned}$$

Initial values

SETTINGS

| Description                 | Value |
|-----------------------------|-------|
| Velocity field, x component | 0     |
| Velocity field, y component | 0     |
| Velocity field, z component | 0     |



| Description                         | Value      |
|-------------------------------------|------------|
| Pressure                            | 0          |
| Compensate for hydrostatic pressure | On         |
| Turbulent kinetic energy            | spf.kinit  |
| Turbulent dissipation rate          | spf.epinit |

## Coordinate system selection

### SETTINGS

| Description       | Value                    |
|-------------------|--------------------------|
| Coordinate system | Global coordinate system |

## Variables

| Name        | Expression  | Unit                           | Description                 | Selection   |
|-------------|-------------|--------------------------------|-----------------------------|-------------|
| spf.u_initx | 0           | m/s                            | Velocity field, x component | Domains 1–2 |
| spf.u_inity | 0           | m/s                            | Velocity field, y component | Domains 1–2 |
| spf.u_initz | 0           | m/s                            | Velocity field, z component | Domains 1–2 |
| spf.p_init  | spf.p_hydro | Pa                             | Pressure                    | Domains 1–2 |
| spf.k_init  | spf.kinit   | m <sup>2</sup> /s <sup>2</sup> | Turbulent kinetic energy    | Domains 1–2 |
| spf.ep_init | spf.epinit  | m <sup>2</sup> /s <sup>3</sup> | Turbulent dissipation rate  | Domains 1–2 |

## 2.4.5 Wall 1

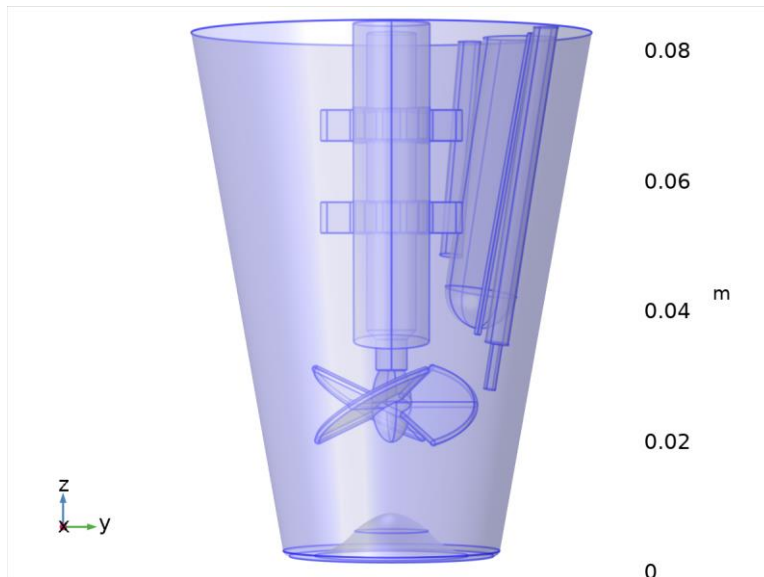

### Wall 1

### SELECTION

|                        |          |
|------------------------|----------|
| Geometric entity level | Boundary |
|------------------------|----------|

|           |                                             |
|-----------|---------------------------------------------|
| Selection | Geometry geom1: Dimension 2: All boundaries |
|-----------|---------------------------------------------|

#### EQUATIONS

$$\begin{aligned} \mathbf{u} \cdot \mathbf{n} &= \mathbf{u}_{tr} \cdot \mathbf{n} \\ \mathbf{Kn} &= -\rho \frac{u_{\tau}}{u_{+}} \mathbf{u}_{rel, \text{ tang}} \\ \mathbf{u}_{rel} &= \mathbf{u} - \mathbf{u}_{tr}, \quad \mathbf{u}_{rel, \text{ tang}} = \mathbf{u}_{rel} - (\mathbf{u}_{rel} \cdot \mathbf{n})\mathbf{n} \\ \nabla k_2 \cdot \mathbf{n} &= 0, \quad \epsilon = \rho \frac{C_{\mu} k_2^2}{\kappa_v \delta_w^+ \mu} \end{aligned}$$

#### Boundary condition

##### SETTINGS

| Description          | Value   |
|----------------------|---------|
| Wall condition       | No slip |
| Apply wall roughness | Off     |

#### Wall movement

##### SETTINGS

| Description            | Value                |
|------------------------|----------------------|
| Translational velocity | Automatic from frame |
| Sliding wall           | Off                  |

#### Variables

| Name      | Expression       | Unit                           | Description                           | Selection                  | Details |
|-----------|------------------|--------------------------------|---------------------------------------|----------------------------|---------|
| spf.hasWF | 1                |                                | Help variable                         | Boundaries 1, 3–39, 41–212 |         |
| spf.k_nn  | max(k2,0)        | m <sup>2</sup> /s <sup>2</sup> | Regularized turbulent kinetic energy  | Boundaries 1, 3–39, 41–212 |         |
| spf.ubndx | spf.utrx+spf.usx | m/s                            | Velocity at boundary, x component     | Boundaries 1, 3–39, 41–212 |         |
| spf.ubndy | spf.utry+spf.usy | m/s                            | Velocity at boundary, y component     | Boundaries 1, 3–39, 41–212 |         |
| spf.ubndz | spf.utrz+spf.usz | m/s                            | Velocity at boundary, z component     | Boundaries 1, 3–39, 41–212 |         |
| spf.usx   | 0                | m/s                            | Velocity of sliding wall, x component | Boundaries 1, 3–39, 41–212 |         |

| Name           | Expression                                                | Unit | Description                           | Selection                  | Details     |
|----------------|-----------------------------------------------------------|------|---------------------------------------|----------------------------|-------------|
| spf.usy        | 0                                                         | m/s  | Velocity of sliding wall, y component | Boundaries 1, 3–39, 41–212 |             |
| spf.usz        | 0                                                         | m/s  | Velocity of sliding wall, z component | Boundaries 1, 3–39, 41–212 |             |
| spf.utrx       | d(x,TIME)                                                 | m/s  | Velocity of moving wall, x component  | Boundaries 41–212          |             |
| spf.utory      | d(y,TIME)                                                 | m/s  | Velocity of moving wall, y component  | Boundaries 41–212          |             |
| spf.utrz       | d(z,TIME)                                                 | m/s  | Velocity of moving wall, z component  | Boundaries 41–212          |             |
| spf.utrx       | 0                                                         | m/s  | Velocity of moving wall, x component  | Boundaries 1, 3–39         |             |
| spf.utory      | 0                                                         | m/s  | Velocity of moving wall, y component  | Boundaries 1, 3–39         |             |
| spf.utrz       | 0                                                         | m/s  | Velocity of moving wall, z component  | Boundaries 1, 3–39         |             |
| spf.uLeakagex  | 0                                                         | m/s  | Leakage velocity, x component         | Boundaries 1, 3–39, 41–212 | + operation |
| spf.uLeakagey  | 0                                                         | m/s  | Leakage velocity, y component         | Boundaries 1, 3–39, 41–212 | + operation |
| spf.uLeagez    | 0                                                         | m/s  | Leakage velocity, z component         | Boundaries 1, 3–39, 41–212 | + operation |
| spf.noSlipWall | 1                                                         | 1    | Help variable                         | Boundaries 1, 3–39, 41–212 |             |
| spf.un_here    | $u*nojac(spfxmesh)+v*nojac(spfnymesh)+w*nojac(spfnzmesh)$ | m/s  | Intermediate variable                 | Boundaries 1, 3–39, 41–212 |             |
| spf.u_herex    | $spf.un\_here*nojac(spfxmesh)$                            | m/s  | Intermediate variable, x component    | Boundaries 1, 3–39, 41–212 |             |
| spf.u_herey    | $spf.un\_here*nojac(spfnymesh)$                           | m/s  | Intermediate variable, y component    | Boundaries 1, 3–39, 41–212 |             |
| spf.u_herez    | $spf.un\_here*nojac(spfnzmesh)$                           | m/s  | Intermediate                          | Boundaries 1,              |             |

| Name                 | Expression                                                                                                                       | Unit             | Description                         | Selection                  | Details |
|----------------------|----------------------------------------------------------------------------------------------------------------------------------|------------------|-------------------------------------|----------------------------|---------|
|                      | nzmesh)                                                                                                                          |                  | variable, z component               | 3–39, 41–212               |         |
| spf.un_there         | (spf.ubndx+spf.uLeakage)*nojac(spf.nxmesh)+(spf.ubndy+spf.uLeakage)*nojac(spf.nymesh)+(spf.ubndz+spf.uLeakage)*nojac(spf.nzmesh) | m/s              | Intermediate variable               | Boundaries 1, 3–39, 41–212 |         |
| spf.u_there_x        | spf.un_there*nojac(spf.nxmesh)                                                                                                   | m/s              | Intermediate variable, x component  | Boundaries 1, 3–39, 41–212 |         |
| spf.u_there_y        | spf.un_there*nojac(spf.nymesh)                                                                                                   | m/s              | Intermediate variable, y component  | Boundaries 1, 3–39, 41–212 |         |
| spf.u_there_z        | spf.un_there*nojac(spf.nzmesh)                                                                                                   | m/s              | Intermediate variable, z component  | Boundaries 1, 3–39, 41–212 |         |
| spf.unJump           | spf.un_here-spf.un_there                                                                                                         | m/s              | Jump in normal velocity             | Boundaries 1, 3–39, 41–212 |         |
| spf.KStressn_avx     | spf.K_stress_tensorxx*spf.nxmesh+spf.K_stress_tensorxy*spf.nymesh+spf.K_stress_tensorxz*spf.nzmesh                               | N/m <sup>2</sup> | Average viscous stress, x component | Boundaries 1, 3–39, 41–212 |         |
| spf.KStressn_avy     | spf.K_stress_tensoryx*spf.nxmesh+spf.K_stress_tensoryy*spf.nymesh+spf.K_stress_tensoryz*spf.nzmesh                               | N/m <sup>2</sup> | Average viscous stress, y component | Boundaries 1, 3–39, 41–212 |         |
| spf.KStressn_avz     | spf.K_stress_tensorzx*spf.nxmesh+spf.K_stress_tensorzy*spf.nymesh+spf.K_stress_tensorzz*spf.nzmesh                               | N/m <sup>2</sup> | Average viscous stress, z component | Boundaries 1, 3–39, 41–212 |         |
| spf.KStressTestn_avx | spf.K_stress_tensor_testxx*spf.nxmesh+spf.K_stress_tensor_testxy*spf.nymesh+spf.K_stress_tensor_testxz*spf.nzmesh                | N/m <sup>2</sup> | Average viscous stress, x component | Boundaries 1, 3–39, 41–212 |         |
| spf.KStressTestn_avy | spf.K_stress_tensor_testyx*spf.nxmesh+spf.K_stress_tensor_testyy                                                                 | N/m <sup>2</sup> | Average viscous stress, y component | Boundaries 1, 3–39, 41–212 |         |

| Name                 | Expression                                                                                                                                                                    | Unit              | Description                         | Selection                  | Details |
|----------------------|-------------------------------------------------------------------------------------------------------------------------------------------------------------------------------|-------------------|-------------------------------------|----------------------------|---------|
|                      | *spf.nymesh+spf.K_stress_tensor_testyz*spf.nzmesh                                                                                                                             |                   |                                     |                            |         |
| spf.KStressTestn_avz | spf.K_stress_tensor_testzx*spf.nxmesh+spf.K_stress_tensor_testzy*spf.nymesh+spf.K_stress_tensor_testzz*spf.nzmesh                                                             | N/m <sup>2</sup>  | Average viscous stress, z component | Boundaries 1, 3–39, 41–212 |         |
| spf.ujumpx           | spf.u_herex-spf.u_therex                                                                                                                                                      | m/s               | Velocity jump, x component          | Boundaries 1, 3–39, 41–212 |         |
| spf.ujumpy           | spf.u_herey-spf.u_therey                                                                                                                                                      | m/s               | Velocity jump, y component          | Boundaries 1, 3–39, 41–212 |         |
| spf.ujumpz           | spf.u_herez-spf.u_therez                                                                                                                                                      | m/s               | Velocity jump, z component          | Boundaries 1, 3–39, 41–212 |         |
| spf.contCoeffFace    | down(spf.contCoeff)                                                                                                                                                           | kg/m <sup>3</sup> | Help variable                       | Boundaries 1, 3–39, 41–212 |         |
| spf.rhoFace          | down(spf.rho)                                                                                                                                                                 | kg/m <sup>3</sup> | Density face value                  | Boundaries 1, 3–39, 41–212 |         |
| spf.c_here           | 36*nojac(down(spf.mu+spf.muT)/down(1))*spf.meshVol/spf.meshVolInt                                                                                                             | Pa·s/m            | Intermediate variable               | Boundaries 1, 3–39, 41–212 |         |
| spf.meshVol          | meshvol_spatial                                                                                                                                                               | m <sup>2</sup>    |                                     | Boundaries 1, 3–39, 41–212 |         |
| spf.meshVolInt       | down(meshvol_spatial)                                                                                                                                                         | m <sup>3</sup>    | Volume of interior mesh element     | Boundaries 1, 3–39, 41–212 |         |
| spf.sigma_dg_ns      | 4*spf.c_here                                                                                                                                                                  | Pa·s/m            |                                     | Boundaries 1, 3–39, 41–212 |         |
| spf.umxTnFace        | (spf.upwind_helpx*spf.nxmesh+spf.upwind_helpy*spf.nymesh+spf.upwind_helpz*spf.nzmesh<0)*(spf.upwind_helpx*spf.nxmesh+spf.upwind_helpy*spf.nymesh+spf.upwind_helpz*spf.nzmesh) | m/s               | Relative velocity on face           | Boundaries 1, 3–39, 41–212 |         |
| spf.upwind_ns        | spf.rhoFace*spf.umxTnFace*spf.unJump*test(spf.un_here)/down(1)^2                                                                                                              | W/m <sup>2</sup>  | Upwind term                         | Boundaries 1, 3–39, 41–212 |         |

| Name           | Expression                                                                                                           | Unit                                               | Description                                       | Selection                  | Details     |
|----------------|----------------------------------------------------------------------------------------------------------------------|----------------------------------------------------|---------------------------------------------------|----------------------------|-------------|
| spf.upwindCont | spf.contCoeffFace*spf.unJump*test(p2)                                                                                | kg <sup>2</sup> /(m <sup>3</sup> .s <sup>3</sup> ) | Upwind term for continuity equation               | Boundaries 1, 3–39, 41–212 |             |
| spf.pFace      | p2                                                                                                                   | Pa                                                 | Pressure face value                               | Boundaries 1, 3–39, 41–212 |             |
| spf.consFlux   | - spf.pFace*test(spff.un_ here)                                                                                      | W/m <sup>2</sup>                                   | Conservative flux                                 | Boundaries 1, 3–39, 41–212 | + operation |
| spf.d_w_plus   | nojac(max(11.06,0.5*spf.mixLParam^0.25*sqrt(spff.k_nn)*down(spff.rho))/(down(spff.mu)*down(tremetric_spatial)^0.5))) | 1                                                  | Wall lift-off in viscous units                    | Boundaries 1, 3–39, 41–212 |             |
| spf.uPlus      | log(spff.d_w_plus)/spf.kappav+spf.B                                                                                  | 1                                                  | Tangential velocity in viscous units              | Boundaries 1, 3–39, 41–212 | + operation |
| spf.mixLParam  | spf.C_mu                                                                                                             | 1                                                  | Intermediate variable                             | Boundaries 1, 3–39, 41–212 |             |
| spf.ep_w       | spf.mixLParam*spf.k_nn^2*nojac(down(spff.rho))/(spf.kappav*spf.d_w_plus*nojac(down(spff.mu)))                        | m <sup>2</sup> /s <sup>3</sup>                     | Turbulent dissipation rate, (wall adjacent cells) | Boundaries 1, 3–39, 41–212 |             |
| spf.u_tau      | nojac(max(spff.mixLParam^0.25*sqrt(spff.k_nn),sqrt(spff.u_tangx^2+spff.u_tangy^2+spff.u_tangz^2+eps)/spf.uPlus))     | m/s                                                | Friction velocity                                 | Boundaries 1, 3–39, 41–212 |             |
| spf.u_tangx    | u-spff.ubndx-spff.nxmesh*((u-spff.ubndx)*spff.nxmesh+(v-spff.ubndy)*spff.nymesh+(w-spff.ubndz)*spff.nzmesh)          | m/s                                                | Velocity field, x component                       | Boundaries 1, 3–39, 41–212 |             |
| spf.u_tangy    | v-spff.ubndy-spff.nymesh*((u-spff.ubndx)*spff.nxmesh+(v-spff.ubndy)*spff.nymesh+(w-spff.ubndz)*spff.nzmesh)          | m/s                                                | Velocity field, y component                       | Boundaries 1, 3–39, 41–212 |             |

| Name             | Expression                                                                                          | Unit | Description                       | Selection                  | Details |
|------------------|-----------------------------------------------------------------------------------------------------|------|-----------------------------------|----------------------------|---------|
|                  | spf.ubndz)*spf.nzmesh)                                                                              |      |                                   |                            |         |
| spf.u_tangz      | w-spf.ubndz-spf.nzmesh*((u-spf.ubndx)*spf.nxmesh+(v-spf.ubndy)*spf.nymesh+(w-spf.ubndz)*spf.nzmesh) | m/s  | Velocity field, z component       | Boundaries 1, 3–39, 41–212 |         |
| spf.delta_w      | spf.d_w_plus*down(spf.mu)/(down(spf.rho)*max(spf.u_tau,sqrt(eps)))                                  | m    | Wall lift-off                     | Boundaries 1, 3–39, 41–212 |         |
| spf.uStar        | spf.u_tau                                                                                           | m/s  | Friction velocity                 | Boundaries 1, 3–39, 41–212 |         |
| spf.Delta_wPlus  | spf.d_w_plus                                                                                        | 1    | Wall resolution in viscous units  | Boundaries 1, 3–39, 41–212 |         |
| spf.WRHeightExpr | -11.06+spf.d_w_plus                                                                                 | 1    | Wall resolution height expression | Boundaries 1, 3–39, 41–212 |         |

### Weak expressions

| Weak expression                                                                                                                                                                                                                                                                                 | Integration order | Integration frame | Selection                  |
|-------------------------------------------------------------------------------------------------------------------------------------------------------------------------------------------------------------------------------------------------------------------------------------------------|-------------------|-------------------|----------------------------|
| spf.KStressn_avx*test(spf.u_herex)+spf.KStressn_avy*test(spf.u_herey)+spf.KStressn_avz*test(spf.u_herez)+spf.KStressTestn_avx*spf.ujumpx+spf.KStressTestn_avy*spf.ujumpy+spf.KStressTestn_avz*spf.ujumpz-spf.sigma_dg_ns*spf.unJump*test(spf.un_here)+spf.upwind_ns+spf.upwindCont+spf.consFlux | 2                 | Spatial           | Boundaries 1, 3–39, 41–212 |
| down(spf.rho)*spf.u_tau*(-spf.u_tangx*test(u)-spf.u_tangy*test(v)-spf.u_tangz*test(w))/spf.uPlus                                                                                                                                                                                                | 2                 | Spatial           | Boundaries 1, 3–39, 41–212 |

### Constraints

| Constraint    | Constraint force | Shape function    | Selection                  | Details   |
|---------------|------------------|-------------------|----------------------------|-----------|
| -ep2+spf.ep_w | test(-ep2)       | Lagrange (Linear) | Boundaries 1, 3–39, 41–212 | Elemental |

## 2.4.6 Gravity 1

### SELECTION

|                        |              |
|------------------------|--------------|
| Geometric entity level | Entire model |
|------------------------|--------------|

### EQUATIONS

$$\rho(\mathbf{u} \cdot \nabla)\mathbf{u} = \nabla \cdot [-p\mathbf{I} + \mathbf{K}] + \mathbf{F} + \rho\mathbf{g}$$

### Acceleration of gravity

#### SETTINGS

| Description                          | Value    |
|--------------------------------------|----------|
| Acceleration of gravity, x component | 0        |
| Acceleration of gravity, y component | 0        |
| Acceleration of gravity, z component | -g_const |
| Include buoyancy-induced turbulence  | Off      |

### Variables

| Name               | Expression     | Unit                   | Description                          | Selection   | Details     |
|--------------------|----------------|------------------------|--------------------------------------|-------------|-------------|
| spf.Fgtotx         | spf.Fgx        | N/m <sup>3</sup>       | Gravity force, x component           | Domains 1–2 | + operation |
| spf.Fgtoty         | spf.Fgy        | N/m <sup>3</sup>       | Gravity force, y component           | Domains 1–2 | + operation |
| spf.Fgtotz         | spf.Fgz        | N/m <sup>3</sup>       | Gravity force, z component           | Domains 1–2 | + operation |
| spf.gx             | 0              | m/s <sup>2</sup>       | Acceleration of gravity, x component | Global      |             |
| spf.gy             | 0              | m/s <sup>2</sup>       | Acceleration of gravity, y component | Global      |             |
| spf.gz             | -g_const       | m/s <sup>2</sup>       | Acceleration of gravity, z component | Global      |             |
| spf.Fgx            | spf.rho*spf.gx | N/m <sup>3</sup>       | Gravity force, x component           | Domains 1–2 |             |
| spf.Fgy            | spf.rho*spf.gy | N/m <sup>3</sup>       | Gravity force, y component           | Domains 1–2 |             |
| spf.Fgz            | spf.rho*spf.gz | N/m <sup>3</sup>       | Gravity force, z component           | Domains 1–2 |             |
| spf.Pkbmph_m<br>ul | 0              | kg/(m <sup>3</sup> ·s) |                                      | Domains 1–2 | + operation |



| Name            | Expression                                                                  | Unit                   | Description          | Selection   | Details     |
|-----------------|-----------------------------------------------------------------------------|------------------------|----------------------|-------------|-------------|
| spf.Pepbmph_mul | 0                                                                           | kg/(m <sup>3</sup> .s) |                      | Domains 1–2 | + operation |
| spf.p_hydro     | spf.rhoref*(spf.gx*(x-spf.rrefx)+spf.gy*(y-spf.rrefy)+spf.gz*(z-spf.rrefz)) | Pa                     | Hydrostatic pressure | Domains 1–2 |             |

### Weak expressions

| Weak expression                                 | Integration order | Integration frame | Selection   |
|-------------------------------------------------|-------------------|-------------------|-------------|
| spf.Fgx*test(u)+spf.Fgy*test(v)+spf.Fgz*test(w) | 2                 | Spatial           | Domains 1–2 |

## 2.4.7 Flow Continuity 1

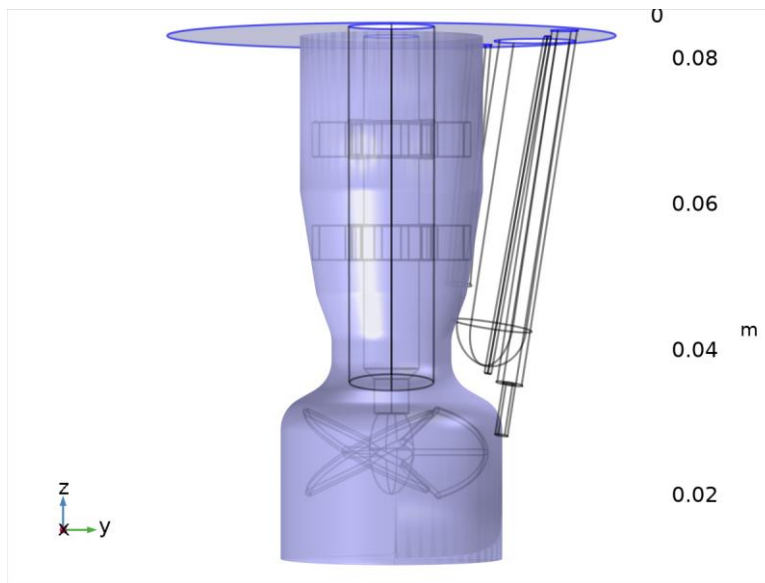

### Flow Continuity 1

#### SELECTION

|                        |                                             |
|------------------------|---------------------------------------------|
| Geometric entity level | Boundary                                    |
| Selection              | Geometry geom1: Dimension 2: All boundaries |

#### EQUATIONS

$$\begin{aligned} \underline{u}_{src} &= \underline{u}_{dst}, \quad p2_{src} = p2_{dst} \\ k2_{src} &= k2_{dst}, \quad \epsilon_{src} = \epsilon_{dst} \end{aligned}$$

## Pair selection

### SETTINGS

| Description | Value                          |
|-------------|--------------------------------|
| Pairs       | Identity Boundary Pair 7 (ap7) |

## Variables

| Name                   | Expression                    | Unit              | Description                        | Selection   | Details |
|------------------------|-------------------------------|-------------------|------------------------------------|-------------|---------|
| spf.mu_here_ap7        | down(spf.mu)                  | Pa-s              | Dynamic viscosity                  | Boundary 2  |         |
| spf.mu_here_ap7        | down(spf.mu)                  | Pa-s              | Dynamic viscosity                  | Boundary 40 |         |
| spf.muT_here_ap7       | spf.muT                       | Pa-s              | Turbulent dynamic viscosity        | Boundary 2  |         |
| spf.muT_here_ap7       | spf.muT                       | Pa-s              | Turbulent dynamic viscosity        | Boundary 40 |         |
| spf.rho_here_ap7       | down(spf.rho)                 | kg/m <sup>3</sup> | Density                            | Boundary 2  |         |
| spf.rho_here_ap7       | down(spf.rho)                 | kg/m <sup>3</sup> | Density                            | Boundary 40 |         |
| spf.rho_there_ap7      | src2dst_ap7(spf.rho_here_ap7) | kg/m <sup>3</sup> | Density                            | Boundary 40 |         |
| spf.rho_there_ap7      | dst2src_ap7(spf.rho_here_ap7) | kg/m <sup>3</sup> | Density                            | Boundary 2  |         |
| spf.contCoeff_here_ap7 | down(spf.contCoeff)           | kg/m <sup>3</sup> | Help variable                      | Boundary 2  |         |
| spf.contCoeff_here_ap7 | down(spf.contCoeff)           | kg/m <sup>3</sup> | Help variable                      | Boundary 40 |         |
| spf.meshVolInt_ap7     | down(meshvol_spatial)         | m <sup>3</sup>    | Volume of interior mesh element    | Boundary 2  |         |
| spf.meshVolInt_ap7     | down(meshvol_spatial)         | m <sup>3</sup>    | Volume of interior mesh element    | Boundary 40 |         |
| spf.meshVol_ap7        | meshvol_spatial               | m <sup>2</sup>    |                                    | Boundary 2  |         |
| spf.meshVol_ap7        | meshvol_spatial               | m <sup>2</sup>    |                                    | Boundary 40 |         |
| spf.u_here_ap7x        | u                             | m/s               | Intermediate variable, x component | Boundary 2  |         |
| spf.u_here_ap7y        | v                             | m/s               | Intermediate variable, y component | Boundary 2  |         |
| spf.u_here_ap7z        | w                             | m/s               | Intermediate variable, z component | Boundary 2  |         |
| spf.u_here_ap7x        | u                             | m/s               | Intermediate                       | Boundary 40 |         |

| Name                   | Expression                                                                                             | Unit             | Description                         | Selection   | Details |
|------------------------|--------------------------------------------------------------------------------------------------------|------------------|-------------------------------------|-------------|---------|
|                        |                                                                                                        |                  | variable, x component               |             |         |
| spf.u_here_ap7y        | v                                                                                                      | m/s              | Intermediate variable, y component  | Boundary 40 |         |
| spf.u_here_ap7z        | w                                                                                                      | m/s              | Intermediate variable, z component  | Boundary 40 |         |
| spf.u_there_ap7x       | src2dst_ap7(u)                                                                                         | m/s              | Intermediate variable, x component  | Boundary 40 |         |
| spf.u_there_ap7y       | src2dst_ap7(v)                                                                                         | m/s              | Intermediate variable, y component  | Boundary 40 |         |
| spf.u_there_ap7z       | src2dst_ap7(w)                                                                                         | m/s              | Intermediate variable, z component  | Boundary 40 |         |
| spf.u_there_ap7x       | dst2src_ap7(u)                                                                                         | m/s              | Intermediate variable, x component  | Boundary 2  |         |
| spf.u_there_ap7y       | dst2src_ap7(v)                                                                                         | m/s              | Intermediate variable, y component  | Boundary 2  |         |
| spf.u_there_ap7z       | dst2src_ap7(w)                                                                                         | m/s              | Intermediate variable, z component  | Boundary 2  |         |
| spf.p_here_ap7         | p2                                                                                                     | Pa               | Pressure                            | Boundary 2  |         |
| spf.p_here_ap7         | p2                                                                                                     | Pa               | Pressure                            | Boundary 40 |         |
| spf.KStressn_here_ap7x | spf.K_stress_tensorxx*<br>spf.nxmesh+spf.K_stress_tensorxy*spf.nymesh+spf.K_stress_tensorxz*spf.nzmesh | N/m <sup>2</sup> | Average viscous stress, x component | Boundary 2  |         |
| spf.KStressn_here_ap7y | spf.K_stress_tensoryx*spf.nxmesh+spf.K_stress_tensoryy*spf.ny mesh+spf.K_stress_tensoryz*spf.nzmesh    | N/m <sup>2</sup> | Average viscous stress, y component | Boundary 2  |         |
| spf.KStressn_here_ap7z | spf.K_stress_tensorzx*<br>spf.nxmesh+spf.K_stress_tensorzy*spf.nymesh+spf.K_stress_tensorzz*spf.nzmesh | N/m <sup>2</sup> | Average viscous stress, z component | Boundary 2  |         |

| Name                    | Expression                                                                                                                                        | Unit             | Description                         | Selection   | Details |
|-------------------------|---------------------------------------------------------------------------------------------------------------------------------------------------|------------------|-------------------------------------|-------------|---------|
| spf.KStressn_here_ap7x  | spf.K_stress_tensorxx*<br>spf.nxmesh+spf.K_stress_tensorxy*spf.nymesh+spf.K_stress_tensorxz*spf.nzmesh                                            | N/m <sup>2</sup> | Average viscous stress, x component | Boundary 40 |         |
| spf.KStressn_here_ap7y  | spf.K_stress_tensorxy*<br>spf.nxmesh+spf.K_stress_tensoryy*spf.ny<br>mesh+spf.K_stress_tensoryz*spf.nzmesh                                        | N/m <sup>2</sup> | Average viscous stress, y component | Boundary 40 |         |
| spf.KStressn_here_ap7z  | spf.K_stress_tensorzx*<br>spf.nxmesh+spf.K_stress_tensorzy*spf.nymesh+spf.K_stress_tensorzz*spf.nzmesh                                            | N/m <sup>2</sup> | Average viscous stress, z component | Boundary 40 |         |
| spf.KStressn_there_ap7x | src2dst_ap7(spf.K_stress_tensorxx)*spf.nx<br>mesh+src2dst_ap7(spf.K_stress_tensorxy)*<br>spf.nymesh+src2dst_ap7(spf.K_stress_tensorxz)*spf.nzmesh | N/m <sup>2</sup> | Average viscous stress, x component | Boundary 40 |         |
| spf.KStressn_there_ap7y | src2dst_ap7(spf.K_stress_tensorxy)*spf.nx<br>mesh+src2dst_ap7(spf.K_stress_tensoryy)*<br>spf.nymesh+src2dst_ap7(spf.K_stress_tensoryz)*spf.nzmesh | N/m <sup>2</sup> | Average viscous stress, y component | Boundary 40 |         |
| spf.KStressn_there_ap7z | src2dst_ap7(spf.K_stress_tensorzx)*spf.nx<br>mesh+src2dst_ap7(spf.K_stress_tensorzy)*<br>spf.nymesh+src2dst_ap7(spf.K_stress_tensorzz)*spf.nzmesh | N/m <sup>2</sup> | Average viscous stress, z component | Boundary 40 |         |
| spf.KStressn_there_ap7x | dst2src_ap7(spf.K_stress_tensorxx)*spf.nx<br>mesh+dst2src_ap7(spf.K_stress_tensorxy)*<br>spf.nymesh+dst2src_ap7(spf.K_stress_tensorxz)*spf.nzmesh | N/m <sup>2</sup> | Average viscous stress, x component | Boundary 2  |         |
| spf.KStressn_there_ap7y | dst2src_ap7(spf.K_stress_tensorxy)*spf.nx                                                                                                         | N/m <sup>2</sup> | Average viscous stress, y           | Boundary 2  |         |

| Name                        | Expression                                                                                                                                                          | Unit             | Description                               | Selection   | Details |
|-----------------------------|---------------------------------------------------------------------------------------------------------------------------------------------------------------------|------------------|-------------------------------------------|-------------|---------|
|                             | mesh+dst2src_ap7(sp<br>f.K_stress_tensoryy)*s<br>pf.nymesh+dst2src_a<br>p7(sp.f.K_stress_tenso<br>ryz)*spf.nzmesh                                                   |                  | component                                 |             |         |
| spf.KStressn_there<br>_ap7z | dst2src_ap7(sp.f.K_str<br>ess_tensorxz)*spf.nx<br>mesh+dst2src_ap7(sp<br>f.K_stress_tensorzy)*s<br>pf.nymesh+dst2src_a<br>p7(sp.f.K_stress_tenso<br>rzz)*spf.nzmesh | N/m <sup>2</sup> | Average viscous<br>stress, z<br>component | Boundary 2  |         |
| spf.KStressn_av_ap<br>7x    | 0.5*(spf.KStressn_her<br>e_ap7x+spf.KStressn_<br>there_ap7x)                                                                                                        | N/m <sup>2</sup> | Average viscous<br>stress, x<br>component | Boundary 2  |         |
| spf.KStressn_av_ap<br>7y    | 0.5*(spf.KStressn_her<br>e_ap7y+spf.KStressn_<br>there_ap7y)                                                                                                        | N/m <sup>2</sup> | Average viscous<br>stress, y<br>component | Boundary 2  |         |
| spf.KStressn_av_ap<br>7z    | 0.5*(spf.KStressn_her<br>e_ap7z+spf.KStressn_<br>there_ap7z)                                                                                                        | N/m <sup>2</sup> | Average viscous<br>stress, z<br>component | Boundary 2  |         |
| spf.KStressn_av_ap<br>7x    | 0.5*(spf.KStressn_her<br>e_ap7x+spf.KStressn_<br>there_ap7x)                                                                                                        | N/m <sup>2</sup> | Average viscous<br>stress, x<br>component | Boundary 40 |         |
| spf.KStressn_av_ap<br>7y    | 0.5*(spf.KStressn_her<br>e_ap7y+spf.KStressn_<br>there_ap7y)                                                                                                        | N/m <sup>2</sup> | Average viscous<br>stress, y<br>component | Boundary 40 |         |
| spf.KStressn_av_ap<br>7z    | 0.5*(spf.KStressn_her<br>e_ap7z+spf.KStressn_<br>there_ap7z)                                                                                                        | N/m <sup>2</sup> | Average viscous<br>stress, z<br>component | Boundary 40 |         |
| spf.ujump_ap7x              | spf.u_here_ap7x-<br>spf.u_there_ap7x                                                                                                                                | m/s              | Velocity jump, x<br>component             | Boundary 2  |         |
| spf.ujump_ap7y              | spf.u_here_ap7y-<br>spf.u_there_ap7y                                                                                                                                | m/s              | Velocity jump, y<br>component             | Boundary 2  |         |
| spf.ujump_ap7z              | spf.u_here_ap7z-<br>spf.u_there_ap7z                                                                                                                                | m/s              | Velocity jump, z<br>component             | Boundary 2  |         |
| spf.ujump_ap7x              | spf.u_here_ap7x-<br>spf.u_there_ap7x                                                                                                                                | m/s              | Velocity jump, x<br>component             | Boundary 40 |         |
| spf.ujump_ap7y              | spf.u_here_ap7y-<br>spf.u_there_ap7y                                                                                                                                | m/s              | Velocity jump, y<br>component             | Boundary 40 |         |
| spf.ujump_ap7z              | spf.u_here_ap7z-<br>spf.u_there_ap7z                                                                                                                                | m/s              | Velocity jump, z<br>component             | Boundary 40 |         |
| spf.c_here_ap7              | 36*nojac((spf.mu_her                                                                                                                                                | Pa·s/m           |                                           | Boundary 2  |         |

| Name                  | Expression                                                                                                      | Unit              | Description               | Selection   | Details |
|-----------------------|-----------------------------------------------------------------------------------------------------------------|-------------------|---------------------------|-------------|---------|
|                       | $e_{ap7} + spf.muT\_here\_ap7) / spf.epsilon_p) * spf.meshVol\_ap7 / spf.meshVolInt\_ap7$                       |                   |                           |             |         |
| spf.c_here_ap7        | $36 * nojac((spf.mu\_here\_ap7 + spf.muT\_here\_ap7) / spf.epsilon_p) * spf.meshVol\_ap7 / spf.meshVolInt\_ap7$ | Pa-s/m            |                           | Boundary 40 |         |
| spf.sigma_dg_ns_ap7   | $spf.c\_here\_ap7 + dst2src\_ap7(spf.c\_here\_ap7)$                                                             | Pa-s/m            |                           | Boundary 2  |         |
| spf.sigma_dg_ns_ap7   | $spf.c\_here\_ap7 + src2dst\_ap7(spf.c\_here\_ap7)$                                                             | Pa-s/m            |                           | Boundary 40 |         |
| spf.rhoFace_ap7       | $0.5 * (spf.rho\_here\_ap7 + spf.rho\_there\_ap7)$                                                              | kg/m <sup>3</sup> | Density face value        | Boundary 2  |         |
| spf.rhoFace_ap7       | $0.5 * (spf.rho\_here\_ap7 + spf.rho\_there\_ap7)$                                                              | kg/m <sup>3</sup> | Density face value        | Boundary 40 |         |
| spf.rhoJump_ap7       | $spf.rho\_here\_ap7 - spf.rho\_there\_ap7$                                                                      | kg/m <sup>3</sup> | Density face value        | Boundary 2  |         |
| spf.rhoJump_ap7       | $spf.rho\_here\_ap7 - spf.rho\_there\_ap7$                                                                      | kg/m <sup>3</sup> | Density face value        | Boundary 40 |         |
| spf.contCoeffFace_ap7 | $0.5 * (spf.contCoeff\_here\_ap7 + dst2src\_ap7(spf.contCoeff\_here\_ap7))$                                     | kg/m <sup>3</sup> | Help variable             | Boundary 2  |         |
| spf.contCoeffFace_ap7 | $0.5 * (spf.contCoeff\_here\_ap7 + src2dst\_ap7(spf.contCoeff\_here\_ap7))$                                     | kg/m <sup>3</sup> | Help variable             | Boundary 40 |         |
| spf.umxTnFace_ap7     | $0.5 * (spf.umxTn\_here\_ap7 + spf.umxTn\_there\_ap7 < 0) * (spf.umxTn\_here\_ap7 + spf.umxTn\_there\_ap7)$     | m/s               | Relative velocity on face | Boundary 2  |         |
| spf.umxTnFace_ap7     | $0.5 * (spf.umxTn\_here\_ap7 + spf.umxTn\_there\_ap7 < 0) * (spf.umxTn\_here\_ap7 + spf.umxTn\_there\_ap7)$     | m/s               | Relative velocity on face | Boundary 40 |         |
| spf.umxTn_here_ap7    | $spf.upwind\_helpx * spf.nxmesh + spf.upwind\_helpy * spf.ny mesh + sp$                                         | m/s               | Relative velocity on face | Boundary 2  |         |

| Name                    | Expression                                                                                                                                                                                         | Unit                                               | Description                               | Selection   | Details |
|-------------------------|----------------------------------------------------------------------------------------------------------------------------------------------------------------------------------------------------|----------------------------------------------------|-------------------------------------------|-------------|---------|
|                         | f.upwind_helpz*spf.n<br>zmesh                                                                                                                                                                      |                                                    |                                           |             |         |
| spf.umxTn_here_a<br>p7  | spf.upwind_helpx*spf<br>.nxmesh+spf.upwind_<br>helpy*spf.nymesh+sp<br>f.upwind_helpz*spf.n<br>zmesh                                                                                                | m/s                                                | Relative velocity<br>on face              | Boundary 40 |         |
| spf.umxTn_there_a<br>p7 | dst2src_ap7(spf.upwi<br>nd_helpx)*spf.nxm<br>esh+dst2src_ap7(sp<br>f.upwind_helpy)*spf.nym<br>esh+dst2src_ap7(sp<br>f.upwind_helpz)*spf.n<br>zmesh                                                 | m/s                                                | Relative velocity<br>on face              | Boundary 2  |         |
| spf.umxTn_there_a<br>p7 | src2dst_ap7(spf.upwi<br>nd_helpx)*spf.nxm<br>esh+src2dst_ap7(sp<br>f.upwind_helpy)*spf.nym<br>esh+src2dst_ap7(sp<br>f.upwind_helpz)*spf.n<br>zmesh                                                 | m/s                                                | Relative velocity<br>on face              | Boundary 40 |         |
| spf.upwind_ns_ap7       | spf.rhoFace_ap7*spf.<br>umxTnFace_ap7*(spf.<br>ujump_ap7x*test(sp<br>f.u_here_ap7x)+spf.<br>ujump_ap7y*test(sp<br>f.u_here_ap7y)+spf.<br>ujump_ap7z*test(sp<br>f.u_here_ap7z))/spf.<br>epsilon_p^2 | W/m <sup>2</sup>                                   | Upwind term                               | Boundary 2  |         |
| spf.upwind_ns_ap7       | spf.rhoFace_ap7*spf.<br>umxTnFace_ap7*(spf.<br>ujump_ap7x*test(sp<br>f.u_here_ap7x)+spf.<br>ujump_ap7y*test(sp<br>f.u_here_ap7y)+spf.<br>ujump_ap7z*test(sp<br>f.u_here_ap7z))/spf.<br>epsilon_p^2 | W/m <sup>2</sup>                                   | Upwind term                               | Boundary 40 |         |
| spf.upwindCont_a<br>p7  | 0.5*spf.contCoeffFace<br>_ap7*(spf.ujump_ap<br>7x*spf.nxmesh+spf.<br>ujump_ap7y*spf.nym<br>esh+spf.ujump_ap7z<br>*spf.nzmesh)*test<br>(spf.p_h                                                     | kg <sup>2</sup> /(m <sup>3</sup> .s <sup>3</sup> ) | Upwind term for<br>continuity<br>equation | Boundary 2  |         |

| Name                 | Expression                                                                                                                     | Unit                                               | Description                         | Selection   | Details     |
|----------------------|--------------------------------------------------------------------------------------------------------------------------------|----------------------------------------------------|-------------------------------------|-------------|-------------|
|                      | ere_ap7)                                                                                                                       |                                                    |                                     |             |             |
| spf.upwindCont_ap7   | 0.5*spf.contCoeffFace_ap7*(spf.ujump_ap7x*spf.nxmesh+spf.ujump_ap7y*spf.nymesh+spf.ujump_ap7z*spf.nzmesh)*test(spf.p_here_ap7) | kg <sup>2</sup> /(m <sup>3</sup> .s <sup>3</sup> ) | Upwind term for continuity equation | Boundary 40 |             |
| spf.p_there_ap7      | dst2src_ap7(p2)                                                                                                                | Pa                                                 | Pressure                            | Boundary 2  |             |
| spf.p_there_ap7      | src2dst_ap7(p2)                                                                                                                | Pa                                                 | Pressure                            | Boundary 40 |             |
| spf.pJump_ap7        | spf.p_here_ap7-spfp.p_there_ap7                                                                                                | Pa                                                 | Pressure jump                       | Boundary 2  |             |
| spf.pJump_ap7        | spf.p_here_ap7-spfp.p_there_ap7                                                                                                | Pa                                                 | Pressure jump                       | Boundary 40 |             |
| spf.pFace_ap7        | 0.5*(spf.p_here_ap7+spf.p_there_ap7)                                                                                           | Pa                                                 | Pressure face value                 | Boundary 2  |             |
| spf.pFace_ap7        | 0.5*(spf.p_here_ap7+spf.p_there_ap7)                                                                                           | Pa                                                 | Pressure face value                 | Boundary 40 |             |
| spf.consFlux_ap7     | - spf.pFace_ap7*(test(spf.u_here_ap7x)*spf.nxmesh+test(spf.u_here_ap7y)*spf.nymesh+test(spf.u_here_ap7z)*spf.nzmesh)           | W/m <sup>2</sup>                                   | Conservative flux                   | Boundary 2  | + operation |
| spf.consFlux_ap7     | - spf.pFace_ap7*(test(spf.u_here_ap7x)*spf.nxmesh+test(spf.u_here_ap7y)*spf.nymesh+test(spf.u_here_ap7z)*spf.nzmesh)           | W/m <sup>2</sup>                                   | Conservative flux                   | Boundary 40 | + operation |
| spf.kjump_ap7        | k2-dst2src_ap7(k2)                                                                                                             | m <sup>2</sup> /s <sup>2</sup>                     |                                     | Boundary 2  |             |
| spf.kjump_ap7        | k2-src2dst_ap7(k2)                                                                                                             | m <sup>2</sup> /s <sup>2</sup>                     |                                     | Boundary 40 |             |
| spf.Dk_ap7           | spf.mu_here_ap7+spf.muT_here_ap7/spf.sigmak                                                                                    | Pa.s                                               |                                     | Boundary 2  |             |
| spf.Dk_ap7           | spf.mu_here_ap7+spf.muT_here_ap7/spf.sigmak                                                                                    | Pa.s                                               |                                     | Boundary 40 |             |
| spf.gammak_here_ap7x | spf.Dk_ap7*k2x                                                                                                                 | W/m <sup>2</sup>                                   |                                     | Boundary 2  |             |



| Name                  | Expression                                                                                                                                                                             | Unit                              | Description | Selection   | Details |
|-----------------------|----------------------------------------------------------------------------------------------------------------------------------------------------------------------------------------|-----------------------------------|-------------|-------------|---------|
| spf.gammak_here_ap7y  | spf.Dk_ap7*k2y                                                                                                                                                                         | W/m <sup>2</sup>                  |             | Boundary 2  |         |
| spf.gammak_here_ap7z  | spf.Dk_ap7*k2z                                                                                                                                                                         | W/m <sup>2</sup>                  |             | Boundary 2  |         |
| spf.gammak_here_ap7x  | spf.Dk_ap7*k2x                                                                                                                                                                         | W/m <sup>2</sup>                  |             | Boundary 40 |         |
| spf.gammak_here_ap7y  | spf.Dk_ap7*k2y                                                                                                                                                                         | W/m <sup>2</sup>                  |             | Boundary 40 |         |
| spf.gammak_here_ap7z  | spf.Dk_ap7*k2z                                                                                                                                                                         | W/m <sup>2</sup>                  |             | Boundary 40 |         |
| spf.gammak_there_ap7x | src2dst_ap7(spf.Dk_ap7*k2x)                                                                                                                                                            | W/m <sup>2</sup>                  |             | Boundary 40 |         |
| spf.gammak_there_ap7y | src2dst_ap7(spf.Dk_ap7*k2y)                                                                                                                                                            | W/m <sup>2</sup>                  |             | Boundary 40 |         |
| spf.gammak_there_ap7z | src2dst_ap7(spf.Dk_ap7*k2z)                                                                                                                                                            | W/m <sup>2</sup>                  |             | Boundary 40 |         |
| spf.gammak_there_ap7x | dst2src_ap7(spf.Dk_ap7*k2x)                                                                                                                                                            | W/m <sup>2</sup>                  |             | Boundary 2  |         |
| spf.gammak_there_ap7y | dst2src_ap7(spf.Dk_ap7*k2y)                                                                                                                                                            | W/m <sup>2</sup>                  |             | Boundary 2  |         |
| spf.gammak_there_ap7z | dst2src_ap7(spf.Dk_ap7*k2z)                                                                                                                                                            | W/m <sup>2</sup>                  |             | Boundary 2  |         |
| spf.gammakn_av_ap7    | 0.5*((spf.gammak_here_ap7x+spf.gammak_there_ap7x)*spf.nxmesh+(spf.gammak_here_ap7y+spf.gammak_there_ap7y)*spf.nymesh+(spf.gammak_here_ap7z+spf.gammak_there_ap7z)*spf.nzmesh)*test(k2) | kg·m <sup>2</sup> /s <sup>5</sup> |             | Boundary 2  |         |
| spf.gammakn_av_ap7    | 0.5*((spf.gammak_here_ap7x+spf.gammak_there_ap7x)*spf.nxmesh+(spf.gammak_here_ap7y+spf.gammak_there_ap7y)*spf.nymesh+(spf.gammak_here_ap7z+spf.gammak_there_ap7z)*spf.nzmesh)*test(k2) | kg·m <sup>2</sup> /s <sup>5</sup> |             | Boundary 40 |         |
| spf.gammakn_av_t      | 0.5*spf.Dk_ap7*(test(                                                                                                                                                                  | kg·m <sup>2</sup> /s <sup>5</sup> |             | Boundary 2  |         |

| Name                        | Expression                                                                                        | Unit               | Description | Selection   | Details |
|-----------------------------|---------------------------------------------------------------------------------------------------|--------------------|-------------|-------------|---------|
| est_ap7                     | $k2x)*spf.nxmesh+test(k2y)*spf.nymesh+test(k2z)*spf.nzmesh)*spf.kjump\_ap7$                       |                    |             |             |         |
| spf.gammakn_av_t<br>est_ap7 | $0.5*spf.Dk\_ap7*(test(k2x)*spf.nxmesh+test(k2y)*spf.nymesh+test(k2z)*spf.nzmesh)*spf.kjump\_ap7$ | $kg \cdot m^2/s^5$ |             | Boundary 40 |         |
| spf.c_here_k_ap7            | $18*nojac(spff.Dk\_ap7)*spf.meshVol\_ap7/spf.meshVolInt\_ap7$                                     | $Pa \cdot s/m$     |             | Boundary 2  |         |
| spf.c_here_k_ap7            | $18*nojac(spff.Dk\_ap7)*spf.meshVol\_ap7/spf.meshVolInt\_ap7$                                     | $Pa \cdot s/m$     |             | Boundary 40 |         |
| spf.sigma_dg_k_ap7          | $spf.c\_here\_k\_ap7+dst2src\_ap7(spff.c\_here\_k\_ap7)$                                          | $Pa \cdot s/m$     |             | Boundary 2  |         |
| spf.sigma_dg_k_ap7          | $spf.c\_here\_k\_ap7+src2dst\_ap7(spff.c\_here\_k\_ap7)$                                          | $Pa \cdot s/m$     |             | Boundary 40 |         |
| spf.upwind_k_ap7            | $spf.rhoFace\_ap7*spf.umxTnFace\_ap7*spf.kjump\_ap7*test(k2)$                                     | $kg \cdot m^2/s^5$ | Upwind term | Boundary 2  |         |
| spf.upwind_k_ap7            | $spf.rhoFace\_ap7*spf.umxTnFace\_ap7*spf.kjump\_ap7*test(k2)$                                     | $kg \cdot m^2/s^5$ | Upwind term | Boundary 40 |         |
| spf.epjump_ap7              | $ep2-dst2src\_ap7(ep2)$                                                                           | $m^2/s^2$          |             | Boundary 2  |         |
| spf.epjump_ap7              | $ep2-src2dst\_ap7(ep2)$                                                                           | $m^2/s^2$          |             | Boundary 40 |         |
| spf.Dep_ap7                 | $spf.mu\_here\_ap7+spf.muT\_here\_ap7/spf.sigmaeps$                                               | $Pa \cdot s$       |             | Boundary 2  |         |
| spf.Dep_ap7                 | $spf.mu\_here\_ap7+spf.muT\_here\_ap7/spf.sigmaeps$                                               | $Pa \cdot s$       |             | Boundary 40 |         |
| spf.gammaep_here_ap7x       | $spf.Dep\_ap7*ep2x$                                                                               | $kg/s^4$           |             | Boundary 2  |         |
| spf.gammaep_here_ap7y       | $spf.Dep\_ap7*ep2y$                                                                               | $kg/s^4$           |             | Boundary 2  |         |
| spf.gammaep_here_ap7z       | $spf.Dep\_ap7*ep2z$                                                                               | $kg/s^4$           |             | Boundary 2  |         |
| spf.gammaep_here            | $spf.Dep\_ap7*ep2x$                                                                               | $kg/s^4$           |             | Boundary 40 |         |

| Name                     | Expression                                                                                                                                                                                    | Unit                              | Description | Selection   | Details |
|--------------------------|-----------------------------------------------------------------------------------------------------------------------------------------------------------------------------------------------|-----------------------------------|-------------|-------------|---------|
| e_ap7x                   |                                                                                                                                                                                               |                                   |             |             |         |
| spf.gammaep_here_ap7y    | spf.Dep_ap7*ep2y                                                                                                                                                                              | kg/s <sup>4</sup>                 |             | Boundary 40 |         |
| spf.gammaep_here_ap7z    | spf.Dep_ap7*ep2z                                                                                                                                                                              | kg/s <sup>4</sup>                 |             | Boundary 40 |         |
| spf.gammaep_there_ap7x   | src2dst_ap7(spf.Dep_ap7*ep2x)                                                                                                                                                                 | kg/s <sup>4</sup>                 |             | Boundary 40 |         |
| spf.gammaep_there_ap7y   | src2dst_ap7(spf.Dep_ap7*ep2y)                                                                                                                                                                 | kg/s <sup>4</sup>                 |             | Boundary 40 |         |
| spf.gammaep_there_ap7z   | src2dst_ap7(spf.Dep_ap7*ep2z)                                                                                                                                                                 | kg/s <sup>4</sup>                 |             | Boundary 40 |         |
| spf.gammaep_there_ap7x   | dst2src_ap7(spf.Dep_ap7*ep2x)                                                                                                                                                                 | kg/s <sup>4</sup>                 |             | Boundary 2  |         |
| spf.gammaep_there_ap7y   | dst2src_ap7(spf.Dep_ap7*ep2y)                                                                                                                                                                 | kg/s <sup>4</sup>                 |             | Boundary 2  |         |
| spf.gammaep_there_ap7z   | dst2src_ap7(spf.Dep_ap7*ep2z)                                                                                                                                                                 | kg/s <sup>4</sup>                 |             | Boundary 2  |         |
| spf.gammaepn_av_ap7      | 0.5*((spf.gammaep_here_ap7x+spf.gammaep_there_ap7x)*spf.nxmesh+(spf.gammaep_here_ap7y+spf.gammaep_there_ap7y)*spf.nymesh+(spf.gammaep_here_ap7z+spf.gammaep_there_ap7z)*spf.nzmesh)*test(ep2) | kg·m <sup>2</sup> /s <sup>7</sup> |             | Boundary 2  |         |
| spf.gammaepn_av_ap7      | 0.5*((spf.gammaep_here_ap7x+spf.gammaep_there_ap7x)*spf.nxmesh+(spf.gammaep_here_ap7y+spf.gammaep_there_ap7y)*spf.nymesh+(spf.gammaep_here_ap7z+spf.gammaep_there_ap7z)*spf.nzmesh)*test(ep2) | kg·m <sup>2</sup> /s <sup>7</sup> |             | Boundary 40 |         |
| spf.gammaepn_av_test_ap7 | 0.5*spf.Dep_ap7*(test(ep2x)*spf.nxmesh+test(ep2y)*spf.nymesh+test(ep2z)*spf.nzmesh)*spf.epjump_ap7                                                                                            | kg·m <sup>2</sup> /s <sup>6</sup> |             | Boundary 2  |         |

| Name                     | Expression                                                                                         | Unit                              | Description | Selection   | Details |
|--------------------------|----------------------------------------------------------------------------------------------------|-----------------------------------|-------------|-------------|---------|
| spf.gammaepn_av_test_ap7 | 0.5*spf.Dep_ap7*(test(ep2x)*spf.nxmesh+test(ep2y)*spf.nymesh+test(ep2z)*spf.nzmesh)*spf.epjump_ap7 | kg·m <sup>2</sup> /s <sup>6</sup> |             | Boundary 40 |         |
| spf.c_here_ep_ap7        | 18*nojac(spf.Dep_ap7)*spf.meshVol_ap7/spf.meshVolInt_ap7                                           | Pa·s/m                            |             | Boundary 2  |         |
| spf.c_here_ep_ap7        | 18*nojac(spf.Dep_ap7)*spf.meshVol_ap7/spf.meshVolInt_ap7                                           | Pa·s/m                            |             | Boundary 40 |         |
| spf.sigma_dg_ep_ap7      | spf.c_here_ep_ap7+dst2src_ap7(spf.c_here_ep_ap7)                                                   | Pa·s/m                            |             | Boundary 2  |         |
| spf.sigma_dg_ep_ap7      | spf.c_here_ep_ap7+src2dst_ap7(spf.c_here_ep_ap7)                                                   | Pa·s/m                            |             | Boundary 40 |         |
| spf.upwind_ep_ap7        | spf.rhoFace_ap7*spf.umxTnFace_ap7*spf.epjump_ap7*test(ep2)                                         | kg·m <sup>2</sup> /s <sup>6</sup> | Upwind term | Boundary 2  |         |
| spf.upwind_ep_ap7        | spf.rhoFace_ap7*spf.umxTnFace_ap7*spf.epjump_ap7*test(ep2)                                         | kg·m <sup>2</sup> /s <sup>6</sup> | Upwind term | Boundary 40 |         |

### Weak expressions

| Weak expression                                                                                                                                                                                                                                                                                                                                                                                                                    | Integration order | Integration frame | Selection  |
|------------------------------------------------------------------------------------------------------------------------------------------------------------------------------------------------------------------------------------------------------------------------------------------------------------------------------------------------------------------------------------------------------------------------------------|-------------------|-------------------|------------|
| if(incontact_ap7,spf.KStressn_av_ap7x*test(spf.u_here_ap7x)+spf.KStressn_av_ap7y*test(spf.u_here_ap7y)+spf.KStressn_av_ap7z*test(spf.u_here_ap7z),0)                                                                                                                                                                                                                                                                               | 6                 | Spatial           | Boundary 2 |
| if(incontact_ap7,0.5*((spf.K_stress_tensor_testxx*spf.nxmesh+spf.K_stress_tensor_testxy*spf.nymesh+spf.K_stress_tensor_testxz*spf.nzmesh)*spf.ujump_ap7x+(spf.K_stress_tensor_testyx*spf.nxmesh+spf.K_stress_tensor_testyy*spf.nymesh+spf.K_stress_tensor_testyz*spf.nzmesh)*spf.ujump_ap7y+(spf.K_stress_tensor_testzx*spf.nxmesh+spf.K_stress_tensor_testzy*spf.nymesh+spf.K_stress_tensor_testzz*spf.nzmesh)*spf.ujump_ap7z),0) | 6                 | Spatial           | Boundary 2 |
| if(incontact_ap7,spf.sigma_dg_ns_ap                                                                                                                                                                                                                                                                                                                                                                                                | 6                 | Spatial           | Boundary 2 |

| Weak expression                                                                                                                                                                                                                                                                                                                                                                                                                                                                | Integration order | Integration frame | Selection   |
|--------------------------------------------------------------------------------------------------------------------------------------------------------------------------------------------------------------------------------------------------------------------------------------------------------------------------------------------------------------------------------------------------------------------------------------------------------------------------------|-------------------|-------------------|-------------|
| 7*(-<br>spf.ujump_ap7x*test(spf.u_here_ap7<br>x)-<br>spf.ujump_ap7y*test(spf.u_here_ap7<br>y)-<br>spf.ujump_ap7z*test(spf.u_here_ap7<br>z)),0)                                                                                                                                                                                                                                                                                                                                 |                   |                   |             |
| if(incontact_ap7,spf.upwind_ns_ap7<br>+spf.upwindCont_ap7+spf.consFlux_<br>ap7,0)                                                                                                                                                                                                                                                                                                                                                                                              | 6                 | Spatial           | Boundary 2  |
| if(incontact_ap7,spf.KStressn_av_ap7<br>x*test(spf.u_here_ap7x)+spf.KStressn<br>_av_ap7y*test(spf.u_here_ap7y)+spf.<br>KStressn_av_ap7z*test(spf.u_here_ap<br>7z),0)                                                                                                                                                                                                                                                                                                           | 6                 | Spatial           | Boundary 40 |
| if(incontact_ap7,0.5*((spf.K_stress_te<br>nsor_testxx*spf.nxmesh+spf.K_stress<br>_tensor_testxy*spf.nymesh+spf.K_str<br>ess_tensor_testxz*spf.nzmesh)*spf.uj<br>ump_ap7x+(spf.K_stress_tensor_test<br>yx*spf.nxmesh+spf.K_stress_tensor_t<br>estyy*spf.nymesh+spf.K_stress_tens<br>or_testyz*spf.nzmesh)*spf.ujump_ap<br>7y+(spf.K_stress_tensor_testxz*spf.n<br>xmesh+spf.K_stress_tensor_testzy*s<br>pf.nymesh+spf.K_stress_tensor_testz<br>z*spf.nzmesh)*spf.ujump_ap7z),0) | 6                 | Spatial           | Boundary 40 |
| if(incontact_ap7,spf.sigma_dg_ns_ap<br>7*(-<br>spf.ujump_ap7x*test(spf.u_here_ap7<br>x)-<br>spf.ujump_ap7y*test(spf.u_here_ap7<br>y)-<br>spf.ujump_ap7z*test(spf.u_here_ap7<br>z)),0)                                                                                                                                                                                                                                                                                          | 6                 | Spatial           | Boundary 40 |
| if(incontact_ap7,spf.upwind_ns_ap7<br>+spf.upwindCont_ap7+spf.consFlux_<br>ap7,0)                                                                                                                                                                                                                                                                                                                                                                                              | 6                 | Spatial           | Boundary 40 |
| if(incontact_ap7,spf.gammakn_av_ap<br>7+spf.gammakn_av_test_ap7-<br>spf.sigma_dg_k_ap7*spf.kjump_ap7*<br>test(k2)+spf.upwind_k_ap7,0)                                                                                                                                                                                                                                                                                                                                          | 6                 | Spatial           | Boundary 2  |
| if(incontact_ap7,spf.gammakn_av_ap<br>7+spf.gammakn_av_test_ap7-<br>spf.sigma_dg_k_ap7*spf.kjump_ap7*                                                                                                                                                                                                                                                                                                                                                                          | 6                 | Spatial           | Boundary 40 |

| Weak expression                                                                                                                             | Integration order | Integration frame | Selection   |
|---------------------------------------------------------------------------------------------------------------------------------------------|-------------------|-------------------|-------------|
| test(k2)+spf.upwind_k_ap7,0)                                                                                                                |                   |                   |             |
| if(incontact_ap7,spf.gammaepn_av_a<br>p7+spf.gammaepn_av_test_ap7-<br>spf.sigma_dg_ep_ap7*spf.epjump_a<br>p7*test(ep2)+spf.upwind_ep_ap7,0) | 6                 | Spatial           | Boundary 2  |
| if(incontact_ap7,spf.gammaepn_av_a<br>p7+spf.gammaepn_av_test_ap7-<br>spf.sigma_dg_ep_ap7*spf.epjump_a<br>p7*test(ep2)+spf.upwind_ep_ap7,0) | 6                 | Spatial           | Boundary 40 |

## Wall 1

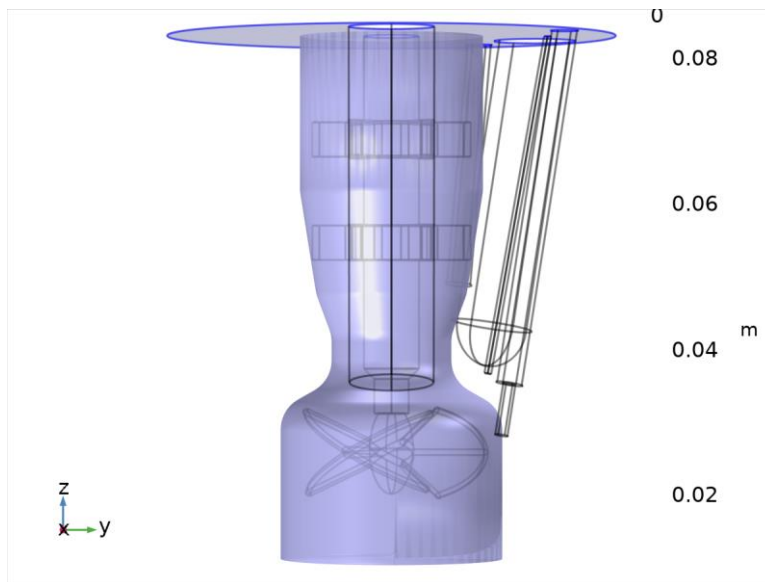

## Wall 1

### SELECTION

|                        |                                             |
|------------------------|---------------------------------------------|
| Geometric entity level | Boundary                                    |
| Selection              | Geometry geom1: Dimension 2: All boundaries |

### EQUATIONS

$$\mathbf{u} \cdot \mathbf{n} = \mathbf{u}_{tr} \cdot \mathbf{n}$$

$$\mathbf{Kn} = -\rho \frac{u_r}{u^+} \mathbf{u}_{rel, tang}$$

$$\mathbf{u}_{rel} = \mathbf{u} - \mathbf{u}_{tr}, \quad \mathbf{u}_{rel, tang} = \mathbf{u}_{rel} - (\mathbf{u}_{rel} \cdot \mathbf{n})\mathbf{n}$$

$$\nabla k2 \cdot \mathbf{n} = 0, \quad \epsilon = \rho \frac{C_\mu k2^2}{\kappa_v \delta_w^+ \mu}$$

## Boundary condition

### SETTINGS

| Description          | Value   |
|----------------------|---------|
| Wall condition       | No slip |
| Apply wall roughness | Off     |

#### Wall movement

##### SETTINGS

| Description            | Value                |
|------------------------|----------------------|
| Translational velocity | Automatic from frame |
| Sliding wall           | Off                  |

#### Variables

| Name      | Expression                            | Unit                           | Description                           | Selection   | Details |
|-----------|---------------------------------------|--------------------------------|---------------------------------------|-------------|---------|
| spf.hasWF | if(!incontact_ap7,1,0)                |                                | Help variable                         | Boundary 40 |         |
| spf.hasWF | if(!incontact_ap7,1,0)                |                                | Help variable                         | Boundary 2  |         |
| spf.k_nn  | if(!incontact_ap7,max(k2,0),0)        | m <sup>2</sup> /s <sup>2</sup> | Regularized turbulent kinetic energy  | Boundary 40 |         |
| spf.k_nn  | if(!incontact_ap7,max(k2,0),0)        | m <sup>2</sup> /s <sup>2</sup> | Regularized turbulent kinetic energy  | Boundary 2  |         |
| spf.ubndx | if(!incontact_ap7,spf.utrx+spf.usx,0) | m/s                            | Velocity at boundary, x component     | Boundary 40 |         |
| spf.ubndy | if(!incontact_ap7,spf.uty+spf.usy,0)  | m/s                            | Velocity at boundary, y component     | Boundary 40 |         |
| spf.ubndz | if(!incontact_ap7,spf.utz+spf.usz,0)  | m/s                            | Velocity at boundary, z component     | Boundary 40 |         |
| spf.ubndx | if(!incontact_ap7,spf.utrx+spf.usx,0) | m/s                            | Velocity at boundary, x component     | Boundary 2  |         |
| spf.ubndy | if(!incontact_ap7,spf.uty+spf.usy,0)  | m/s                            | Velocity at boundary, y component     | Boundary 2  |         |
| spf.ubndz | if(!incontact_ap7,spf.utz+spf.usz,0)  | m/s                            | Velocity at boundary, z component     | Boundary 2  |         |
| spf.usx   | 0                                     | m/s                            | Velocity of sliding wall, x component | Boundary 40 |         |
| spf.usy   | 0                                     | m/s                            | Velocity of                           | Boundary 40 |         |

| Name          | Expression                      | Unit | Description                           | Selection   | Details     |
|---------------|---------------------------------|------|---------------------------------------|-------------|-------------|
|               |                                 |      | sliding wall, y component             |             |             |
| spf.usz       | 0                               | m/s  | Velocity of sliding wall, z component | Boundary 40 |             |
| spf.usx       | 0                               | m/s  | Velocity of sliding wall, x component | Boundary 2  |             |
| spf.usy       | 0                               | m/s  | Velocity of sliding wall, y component | Boundary 2  |             |
| spf.usz       | 0                               | m/s  | Velocity of sliding wall, z component | Boundary 2  |             |
| spf.utrx      | if(!incontact_ap7,d(x,TI ME),0) | m/s  | Velocity of moving wall, x component  | Boundary 40 |             |
| spf.utry      | if(!incontact_ap7,d(y,TI ME),0) | m/s  | Velocity of moving wall, y component  | Boundary 40 |             |
| spf.utrz      | if(!incontact_ap7,d(z,TI ME),0) | m/s  | Velocity of moving wall, z component  | Boundary 40 |             |
| spf.utrx      | 0                               | m/s  | Velocity of moving wall, x component  | Boundary 2  |             |
| spf.utry      | 0                               | m/s  | Velocity of moving wall, y component  | Boundary 2  |             |
| spf.utrz      | 0                               | m/s  | Velocity of moving wall, z component  | Boundary 2  |             |
| spf.uLeakagex | 0                               | m/s  | Leakage velocity, x component         | Boundary 40 | + operation |
| spf.uLeakagey | 0                               | m/s  | Leakage velocity, y component         | Boundary 40 | + operation |
| spf.uLeakagez | 0                               | m/s  | Leakage velocity, z component         | Boundary 40 | + operation |
| spf.uLeakagex | 0                               | m/s  | Leakage velocity, x component         | Boundary 2  | + operation |
| spf.uLeakagey | 0                               | m/s  | Leakage velocity, y component         | Boundary 2  | + operation |



| Name           | Expression                                                                                                                                               | Unit | Description                        | Selection   | Details     |
|----------------|----------------------------------------------------------------------------------------------------------------------------------------------------------|------|------------------------------------|-------------|-------------|
| spf.uLeakagez  | 0                                                                                                                                                        | m/s  | Leakage velocity, z component      | Boundary 2  | + operation |
| spf.noSlipWall | if(!incontact_ap7,1,0)                                                                                                                                   | 1    | Help variable                      | Boundary 40 |             |
| spf.noSlipWall | if(!incontact_ap7,1,0)                                                                                                                                   | 1    | Help variable                      | Boundary 2  |             |
| spf.un_here    | if(!incontact_ap7,u*nojac(spf.nxmesh)+v*nojac(spf.nymesh)+w*nojac(spf.nzmesh),0)                                                                         | m/s  | Intermediate variable              | Boundary 40 |             |
| spf.un_here    | if(!incontact_ap7,u*nojac(spf.nxmesh)+v*nojac(spf.nymesh)+w*nojac(spf.nzmesh),0)                                                                         | m/s  | Intermediate variable              | Boundary 2  |             |
| spf.u_herex    | if(!incontact_ap7,spf.un_here*nojac(spf.nxmesh),0)                                                                                                       | m/s  | Intermediate variable, x component | Boundary 40 |             |
| spf.u_herey    | if(!incontact_ap7,spf.un_here*nojac(spf.nymesh),0)                                                                                                       | m/s  | Intermediate variable, y component | Boundary 40 |             |
| spf.u_herez    | if(!incontact_ap7,spf.un_here*nojac(spf.nzmesh),0)                                                                                                       | m/s  | Intermediate variable, z component | Boundary 40 |             |
| spf.u_herex    | if(!incontact_ap7,spf.un_here*nojac(spf.nxmesh),0)                                                                                                       | m/s  | Intermediate variable, x component | Boundary 2  |             |
| spf.u_herey    | if(!incontact_ap7,spf.un_here*nojac(spf.nymesh),0)                                                                                                       | m/s  | Intermediate variable, y component | Boundary 2  |             |
| spf.u_herez    | if(!incontact_ap7,spf.un_here*nojac(spf.nzmesh),0)                                                                                                       | m/s  | Intermediate variable, z component | Boundary 2  |             |
| spf.un_there   | if(!incontact_ap7,(spf.ubndx+spf.uLeakagex)*nojac(spf.nxmesh)+(spf.ubndy+spf.uLeakagey)*nojac(spf.nymesh)+(spf.ubndz+spf.uLeakagez)*nojac(spf.nzmesh),0) | m/s  | Intermediate variable              | Boundary 40 |             |
| spf.un_there   | if(!incontact_ap7,(spf.ubndx+spf.uLeakagex)*nojac(spf.nxmesh)+(spf.ubndy+spf.uLeakagey)*nojac(spf.nymesh)+                                               | m/s  | Intermediate variable              | Boundary 2  |             |

| Name                         | Expression                                                                                                                                                     | Unit             | Description                         | Selection   | Details |
|------------------------------|----------------------------------------------------------------------------------------------------------------------------------------------------------------|------------------|-------------------------------------|-------------|---------|
|                              | (spf.ubndz+spf.uLeagez)*nojac(spf.nzmesh),0)                                                                                                                   |                  |                                     |             |         |
| spf.u_there <sub>x</sub>     | if(!incontact_ap7,spf.un_there*nojac(spf.nxm <sub>esh</sub> ),0)                                                                                               | m/s              | Intermediate variable, x component  | Boundary 40 |         |
| spf.u_there <sub>y</sub>     | if(!incontact_ap7,spf.un_there*nojac(spf.nym <sub>esh</sub> ),0)                                                                                               | m/s              | Intermediate variable, y component  | Boundary 40 |         |
| spf.u_there <sub>z</sub>     | if(!incontact_ap7,spf.un_there*nojac(spf.nzm <sub>esh</sub> ),0)                                                                                               | m/s              | Intermediate variable, z component  | Boundary 40 |         |
| spf.u_there <sub>x</sub>     | if(!incontact_ap7,spf.un_there*nojac(spf.nxm <sub>esh</sub> ),0)                                                                                               | m/s              | Intermediate variable, x component  | Boundary 2  |         |
| spf.u_there <sub>y</sub>     | if(!incontact_ap7,spf.un_there*nojac(spf.nym <sub>esh</sub> ),0)                                                                                               | m/s              | Intermediate variable, y component  | Boundary 2  |         |
| spf.u_there <sub>z</sub>     | if(!incontact_ap7,spf.un_there*nojac(spf.nzm <sub>esh</sub> ),0)                                                                                               | m/s              | Intermediate variable, z component  | Boundary 2  |         |
| spf.unJump                   | if(!incontact_ap7,spf.un_here-spf.un_there,0)                                                                                                                  | m/s              | Jump in normal velocity             | Boundary 40 |         |
| spf.unJump                   | if(!incontact_ap7,spf.un_here-spf.un_there,0)                                                                                                                  | m/s              | Jump in normal velocity             | Boundary 2  |         |
| spf.KStressn_av <sub>x</sub> | if(!incontact_ap7,spf.K_stress_tensorxx*spf.nxm <sub>esh</sub> +spf.K_stress_tensoryy*spf.nym <sub>esh</sub> +spf.K_stress_tensorz*spf.nzm <sub>esh</sub> ,0)  | N/m <sup>2</sup> | Average viscous stress, x component | Boundary 40 |         |
| spf.KStressn_av <sub>y</sub> | if(!incontact_ap7,spf.K_stress_tensoryx*spf.nxm <sub>esh</sub> +spf.K_stress_tensoryy*spf.nym <sub>esh</sub> +spf.K_stress_tensoryz*spf.nzm <sub>esh</sub> ,0) | N/m <sup>2</sup> | Average viscous stress, y component | Boundary 40 |         |
| spf.KStressn_av <sub>z</sub> | if(!incontact_ap7,spf.K_stress_tensorz*spf.nxm <sub>esh</sub> +spf.K_stress_tensoryy*spf.nym <sub>esh</sub> +spf.K_stress_tensoryz*spf.nzm <sub>esh</sub> ,0)  | N/m <sup>2</sup> | Average viscous stress, z component | Boundary 40 |         |

| Name                 | Expression                                                                                                                             | Unit             | Description                         | Selection   | Details |
|----------------------|----------------------------------------------------------------------------------------------------------------------------------------|------------------|-------------------------------------|-------------|---------|
| spf.KStressn_avx     | if(!incontact_ap7,spf.K_stress_tensorxx*spf.nxmesh+spf.K_stress_tensorxy*spf.nymesh+spf.K_stress_tensorxz*spf.nzmesh,0)                | N/m <sup>2</sup> | Average viscous stress, x component | Boundary 2  |         |
| spf.KStressn_avy     | if(!incontact_ap7,spf.K_stress_tensoryx*spf.nxmesh+spf.K_stress_tensoryy*spf.nymesh+spf.K_stress_tensoryz*spf.nzmesh,0)                | N/m <sup>2</sup> | Average viscous stress, y component | Boundary 2  |         |
| spf.KStressn_avz     | if(!incontact_ap7,spf.K_stress_tensorzx*spf.nxmesh+spf.K_stress_tensorzy*spf.nymesh+spf.K_stress_tensorzz*spf.nzmesh,0)                | N/m <sup>2</sup> | Average viscous stress, z component | Boundary 2  |         |
| spf.KStressTestn_avx | if(!incontact_ap7,spf.K_stress_tensor_testxx*spf.nxmesh+spf.K_stress_tensor_testxy*spf.nymesh+spf.K_stress_tensor_testxz*spf.nzmesh,0) | N/m <sup>2</sup> | Average viscous stress, x component | Boundary 40 |         |
| spf.KStressTestn_avy | if(!incontact_ap7,spf.K_stress_tensor_testyx*spf.nxmesh+spf.K_stress_tensor_testyy*spf.nymesh+spf.K_stress_tensor_testyz*spf.nzmesh,0) | N/m <sup>2</sup> | Average viscous stress, y component | Boundary 40 |         |
| spf.KStressTestn_avz | if(!incontact_ap7,spf.K_stress_tensor_testzx*spf.nxmesh+spf.K_stress_tensor_testzy*spf.nymesh+spf.K_stress_tensor_testzz*spf.nzmesh,0) | N/m <sup>2</sup> | Average viscous stress, z component | Boundary 40 |         |
| spf.KStressTestn_avx | if(!incontact_ap7,spf.K_stress_tensor_testxx*spf.nxmesh+spf.K_stress_tensor_testxy*spf.nymesh+spf.K_stress_tensor_testxz*spf.nzmesh,   | N/m <sup>2</sup> | Average viscous stress, x component | Boundary 2  |         |

| Name                 | Expression                                                                                                                              | Unit              | Description                         | Selection   | Details |
|----------------------|-----------------------------------------------------------------------------------------------------------------------------------------|-------------------|-------------------------------------|-------------|---------|
|                      | 0)                                                                                                                                      |                   |                                     |             |         |
| spf.KStressTestn_avy | if(!incontact_ap7,spf.K_stress_tensor_testyx*spf.nxmesh+spf.K_stress_tensor_testyy*spf.ny mesh+spf.K_stress_tensor_testyz*spf.nzmesh,0) | N/m <sup>2</sup>  | Average viscous stress, y component | Boundary 2  |         |
| spf.KStressTestn_avz | if(!incontact_ap7,spf.K_stress_tensor_testzx*spf.nxmesh+spf.K_stress_tensor_testzy*spf.ny mesh+spf.K_stress_tensor_testzz*spf.nzmesh,0) | N/m <sup>2</sup>  | Average viscous stress, z component | Boundary 2  |         |
| spf.ujumpx           | if(!incontact_ap7,spf.u_herex-spf.u_there,0)                                                                                            | m/s               | Velocity jump, x component          | Boundary 40 |         |
| spf.ujumpy           | if(!incontact_ap7,spf.u_herey-spf.u_therey,0)                                                                                           | m/s               | Velocity jump, y component          | Boundary 40 |         |
| spf.ujumpz           | if(!incontact_ap7,spf.u_herey-spf.u_therey,0)                                                                                           | m/s               | Velocity jump, z component          | Boundary 40 |         |
| spf.ujumpx           | if(!incontact_ap7,spf.u_herex-spf.u_there,0)                                                                                            | m/s               | Velocity jump, x component          | Boundary 2  |         |
| spf.ujumpy           | if(!incontact_ap7,spf.u_herey-spf.u_therey,0)                                                                                           | m/s               | Velocity jump, y component          | Boundary 2  |         |
| spf.ujumpz           | if(!incontact_ap7,spf.u_herey-spf.u_therey,0)                                                                                           | m/s               | Velocity jump, z component          | Boundary 2  |         |
| spf.contCoeffFace    | if(!incontact_ap7,down(spf.contCoeff),0)                                                                                                | kg/m <sup>3</sup> | Help variable                       | Boundary 40 |         |
| spf.contCoeffFace    | if(!incontact_ap7,down(spf.contCoeff),0)                                                                                                | kg/m <sup>3</sup> | Help variable                       | Boundary 2  |         |
| spf.rhoFace          | if(!incontact_ap7,down(spf.rho),0)                                                                                                      | kg/m <sup>3</sup> | Density face value                  | Boundary 40 |         |
| spf.rhoFace          | if(!incontact_ap7,down(spf.rho),0)                                                                                                      | kg/m <sup>3</sup> | Density face value                  | Boundary 2  |         |
| spf.c_here           | if(!incontact_ap7,36*n ojac(down(spf.mu+spf.muT)/down(1))*spf.meshVol/spf.meshVolInt,0)                                                 | Pa·s/m            | Intermediate variable               | Boundary 40 |         |
| spf.c_here           | if(!incontact_ap7,36*n ojac(down(spf.mu+spf.muT)/down(1))*spf.m                                                                         | Pa·s/m            | Intermediate variable               | Boundary 2  |         |

| Name            | Expression                                                                                                                                                                                         | Unit             | Description                     | Selection   | Details |
|-----------------|----------------------------------------------------------------------------------------------------------------------------------------------------------------------------------------------------|------------------|---------------------------------|-------------|---------|
|                 | eshVol/spf.meshVolInt,0)                                                                                                                                                                           |                  |                                 |             |         |
| spf.meshVol     | if(!incontact_ap7,meshvol_spatial,if(!incontact_ap7,meshvol,0))                                                                                                                                    | m <sup>2</sup>   |                                 | Boundary 40 |         |
| spf.meshVol     | if(!incontact_ap7,meshvol_spatial,if(!incontact_ap7,meshvol,0))                                                                                                                                    | m <sup>2</sup>   |                                 | Boundary 2  |         |
| spf.meshVolInt  | if(!incontact_ap7,down(meshvol_spatial),if(!incontact_ap7,down(meshvol),0))                                                                                                                        | m <sup>3</sup>   | Volume of interior mesh element | Boundary 40 |         |
| spf.meshVolInt  | if(!incontact_ap7,down(meshvol_spatial),if(!incontact_ap7,down(meshvol),0))                                                                                                                        | m <sup>3</sup>   | Volume of interior mesh element | Boundary 2  |         |
| spf.sigma_dg_ns | if(!incontact_ap7,4*spf.c_here,0)                                                                                                                                                                  | Pa·s/m           |                                 | Boundary 40 |         |
| spf.sigma_dg_ns | if(!incontact_ap7,4*spf.c_here,0)                                                                                                                                                                  | Pa·s/m           |                                 | Boundary 2  |         |
| spf.umxTnFace   | if(!incontact_ap7,(spf.upwind_helpx*spf.nxmesh+spf.upwind_helpy*spf.nymesh+spf.upwind_helpz*spf.nzmesh<0)*(spf.upwind_helpx*spf.nxmesh+spf.upwind_helpy*spf.nymesh+spf.upwind_helpz*spf.nzmesh),0) | m/s              | Relative velocity on face       | Boundary 40 |         |
| spf.umxTnFace   | if(!incontact_ap7,(spf.upwind_helpx*spf.nxmesh+spf.upwind_helpy*spf.nymesh+spf.upwind_helpz*spf.nzmesh<0)*(spf.upwind_helpx*spf.nxmesh+spf.upwind_helpy*spf.nymesh+spf.upwind_helpz*spf.nzmesh),0) | m/s              | Relative velocity on face       | Boundary 2  |         |
| spf.upwind_ns   | if(!incontact_ap7,spf.rhoFace*spf.umxTnFace*spf.unJump*test(spfn_here)/down(1)^2,0)                                                                                                                | W/m <sup>2</sup> | Upwind term                     | Boundary 40 |         |

| Name           | Expression                                                                                                                          | Unit                                               | Description                          | Selection   | Details     |
|----------------|-------------------------------------------------------------------------------------------------------------------------------------|----------------------------------------------------|--------------------------------------|-------------|-------------|
| spf.upwind_ns  | if(!incontact_ap7,spf.rho*Face*spf.umxTnFace*spf.unJump*test(spfun_here)/down(1)^2,0)                                               | W/m <sup>2</sup>                                   | Upwind term                          | Boundary 2  |             |
| spf.upwindCont | if(!incontact_ap7,spf.contCoeffFace*spf.unJump*test(p2),0)                                                                          | kg <sup>2</sup> /(m <sup>3</sup> .s <sup>3</sup> ) | Upwind term for continuity equation  | Boundary 40 |             |
| spf.upwindCont | if(!incontact_ap7,spf.contCoeffFace*spf.unJump*test(p2),0)                                                                          | kg <sup>2</sup> /(m <sup>3</sup> .s <sup>3</sup> ) | Upwind term for continuity equation  | Boundary 2  |             |
| spf.pFace      | if(!incontact_ap7,p2,0)                                                                                                             | Pa                                                 | Pressure face value                  | Boundary 40 |             |
| spf.pFace      | if(!incontact_ap7,p2,0)                                                                                                             | Pa                                                 | Pressure face value                  | Boundary 2  |             |
| spf.consFlux   | if(!incontact_ap7,-spf.pFace*test(spfun_here),0)                                                                                    | W/m <sup>2</sup>                                   | Conservative flux                    | Boundary 40 | + operation |
| spf.consFlux   | if(!incontact_ap7,-spf.pFace*test(spfun_here),0)                                                                                    | W/m <sup>2</sup>                                   | Conservative flux                    | Boundary 2  | + operation |
| spf.d_w_plus   | if(!incontact_ap7,nojac(max(11.06,0.5*spf.mixLParam^0.25*sqrt(spfk_nn)*down(spfrho)/(down(spfmue)*down(trimetric_spatial)^0.5))),0) | 1                                                  | Wall lift-off in viscous units       | Boundary 40 |             |
| spf.d_w_plus   | if(!incontact_ap7,nojac(max(11.06,0.5*spf.mixLParam^0.25*sqrt(spfk_nn)*down(spfrho)/(down(spfmue)*down(trimetric_spatial)^0.5))),0) | 1                                                  | Wall lift-off in viscous units       | Boundary 2  |             |
| spf.uPlus      | if(!incontact_ap7,log(spfd_w_plus)/spf.kappav+spf.B,0)                                                                              | 1                                                  | Tangential velocity in viscous units | Boundary 40 | + operation |
| spf.uPlus      | if(!incontact_ap7,log(spfd_w_plus)/spf.kappav+spf.B,0)                                                                              | 1                                                  | Tangential velocity in viscous units | Boundary 2  | + operation |
| spf.mixLParam  | if(!incontact_ap7,spf.C_mu,0)                                                                                                       | 1                                                  | Intermediate variable                | Boundary 40 |             |
| spf.mixLParam  | if(!incontact_ap7,spf.C                                                                                                             | 1                                                  | Intermediate                         | Boundary 2  |             |

| Name        | Expression                                                                                                                                              | Unit                           | Description                                                | Selection   | Details |
|-------------|---------------------------------------------------------------------------------------------------------------------------------------------------------|--------------------------------|------------------------------------------------------------|-------------|---------|
|             | _mu,0)                                                                                                                                                  |                                | variable                                                   |             |         |
| spf.ep_w    | if(!incontact_ap7,spf.m<br>ixLParam*spf.k_nn^2*<br>nojac(down(spf.rho))/<br>spf.kappav*spf.d_w_pl<br>us*nojac(down(spf.mu<br>))),0)                     | m <sup>2</sup> /s <sup>3</sup> | Turbulent<br>dissipation rate,<br>(wall adjacent<br>cells) | Boundary 40 |         |
| spf.ep_w    | if(!incontact_ap7,spf.m<br>ixLParam*spf.k_nn^2*<br>nojac(down(spf.rho))/<br>spf.kappav*spf.d_w_pl<br>us*nojac(down(spf.mu<br>))),0)                     | m <sup>2</sup> /s <sup>3</sup> | Turbulent<br>dissipation rate,<br>(wall adjacent<br>cells) | Boundary 2  |         |
| spf.u_tau   | if(!incontact_ap7,nojac<br>(max(spf.mixLParam^<br>0.25*sqrt(spf.k_nn),sqr<br>t(spf.u_tangx^2+spf.u<br>_tangy^2+spf.u_tangz<br>^2+eps)/spf.uPlus)),0)    | m/s                            | Friction velocity                                          | Boundary 40 |         |
| spf.u_tau   | if(!incontact_ap7,nojac<br>(max(spf.mixLParam^<br>0.25*sqrt(spf.k_nn),sqr<br>t(spf.u_tangx^2+spf.u<br>_tangy^2+spf.u_tangz<br>^2+eps)/spf.uPlus)),0)    | m/s                            | Friction velocity                                          | Boundary 2  |         |
| spf.u_tangx | if(!incontact_ap7,u-<br>spf.ubndx-<br>spf.nxmesh*((u-<br>spf.ubndx)*spf.nxmesh<br>+(v-<br>spf.ubndy)*spf.nymes<br>h+(w-<br>spf.ubndz)*spf.nzmesh<br>,0) | m/s                            | Velocity field, x<br>component                             | Boundary 40 |         |
| spf.u_tangy | if(!incontact_ap7,v-<br>spf.ubndy-<br>spf.nymesh*((u-<br>spf.ubndx)*spf.nxmesh<br>+(v-<br>spf.ubndy)*spf.nymes<br>h+(w-<br>spf.ubndz)*spf.nzmesh<br>,0) | m/s                            | Velocity field, y<br>component                             | Boundary 40 |         |
| spf.u_tangz | if(!incontact_ap7,w-<br>spf.ubndz-                                                                                                                      | m/s                            | Velocity field, z<br>component                             | Boundary 40 |         |

| Name        | Expression                                                                                                                                              | Unit | Description                    | Selection   | Details |
|-------------|---------------------------------------------------------------------------------------------------------------------------------------------------------|------|--------------------------------|-------------|---------|
|             | spf.nzmesh*((u-<br>spf.ubndx)*spf.nxmesh<br>+(v-<br>spf.ubndy)*spf.nymes<br>h+(w-<br>spf.ubndz)*spf.nzmesh<br>,0)                                       |      |                                |             |         |
| spf.u_tangx | if(!incontact_ap7,u-<br>spf.ubndx-<br>spf.nxmesh*((u-<br>spf.ubndx)*spf.nxmesh<br>+(v-<br>spf.ubndy)*spf.nymes<br>h+(w-<br>spf.ubndz)*spf.nzmesh<br>,0) | m/s  | Velocity field, x<br>component | Boundary 2  |         |
| spf.u_tangy | if(!incontact_ap7,v-<br>spf.ubndy-<br>spf.nymesh*((u-<br>spf.ubndx)*spf.nxmesh<br>+(v-<br>spf.ubndy)*spf.nymes<br>h+(w-<br>spf.ubndz)*spf.nzmesh<br>,0) | m/s  | Velocity field, y<br>component | Boundary 2  |         |
| spf.u_tangz | if(!incontact_ap7,w-<br>spf.ubndz-<br>spf.nzmesh*((u-<br>spf.ubndx)*spf.nxmesh<br>+(v-<br>spf.ubndy)*spf.nymes<br>h+(w-<br>spf.ubndz)*spf.nzmesh<br>,0) | m/s  | Velocity field, z<br>component | Boundary 2  |         |
| spf.delta_w | if(!incontact_ap7,spf.d<br>_w_plus*down(spf.mu)<br>/(down(spf.rho)*max(s<br>pf.u_tau,sqrt(eps))),0)                                                     | m    | Wall lift-off                  | Boundary 40 |         |
| spf.delta_w | if(!incontact_ap7,spf.d<br>_w_plus*down(spf.mu)<br>/(down(spf.rho)*max(s<br>pf.u_tau,sqrt(eps))),0)                                                     | m    | Wall lift-off                  | Boundary 2  |         |
| spf.uStar   | if(!incontact_ap7,spf.u_<br>tau,0)                                                                                                                      | m/s  | Friction velocity              | Boundary 40 |         |
| spf.uStar   | if(!incontact_ap7,spf.u_                                                                                                                                | m/s  | Friction velocity              | Boundary 2  |         |



| Name             | Expression                               | Unit | Description                       | Selection   | Details |
|------------------|------------------------------------------|------|-----------------------------------|-------------|---------|
|                  | tau,0)                                   |      |                                   |             |         |
| spf.Delta_wPlus  | if(!incontact_ap7,spf.d_w_plus,0)        | 1    | Wall resolution in viscous units  | Boundary 40 |         |
| spf.Delta_wPlus  | if(!incontact_ap7,spf.d_w_plus,0)        | 1    | Wall resolution in viscous units  | Boundary 2  |         |
| spf.WRHeightExpr | if(!incontact_ap7,-11.06+spf.d_w_plus,0) | 1    | Wall resolution height expression | Boundary 40 |         |
| spf.WRHeightExpr | if(!incontact_ap7,-11.06+spf.d_w_plus,0) | 1    | Wall resolution height expression | Boundary 2  |         |

#### Weak expressions

| Weak expression                                                                                                                                                                                                                                                                                                      | Integration order | Integration frame | Selection   |
|----------------------------------------------------------------------------------------------------------------------------------------------------------------------------------------------------------------------------------------------------------------------------------------------------------------------|-------------------|-------------------|-------------|
| if(!incontact_ap7,spf.KStressn_avx*test(spf.u_herex)+spf.KStressn_avy*test(spf.u_herey)+spf.KStressn_avz*test(spf.u_herez)+spf.KStressTestn_avx*spf.ujumpx+spf.KStressTestn_avy*spf.ujumpy+spf.KStressTestn_avz*spf.ujumpz-spf.sigma_dg_ns*spf.unJump*test(spf.un_here)+spf.upwind_ns+spf.upwindCont+spf.consFlux,0) | 2                 | Spatial           | Boundary 40 |
| if(!incontact_ap7,spf.KStressn_avx*test(spf.u_herex)+spf.KStressn_avy*test(spf.u_herey)+spf.KStressn_avz*test(spf.u_herez)+spf.KStressTestn_avx*spf.ujumpx+spf.KStressTestn_avy*spf.ujumpy+spf.KStressTestn_avz*spf.ujumpz-spf.sigma_dg_ns*spf.unJump*test(spf.un_here)+spf.upwind_ns+spf.upwindCont+spf.consFlux,0) | 2                 | Spatial           | Boundary 2  |
| if(!incontact_ap7,down(spf.rho)*spf.u_tau*(-spf.u_tangx*test(u)-spf.u_tangy*test(v)-spf.u_tangz*test(w))/spf.uPlus,0)                                                                                                                                                                                                | 2                 | Spatial           | Boundary 40 |
| if(!incontact_ap7,down(spf.rho)*spf.u_tau*(-spf.u_tangx*test(u)-spf.u_tangy*test(v)-spf.u_tangz*test(w))/spf.uPlus,0)                                                                                                                                                                                                | 2                 | Spatial           | Boundary 2  |

## Constraints

| Constraint                         | Constraint force                | Shape function    | Selection   | Details   |
|------------------------------------|---------------------------------|-------------------|-------------|-----------|
| if(!incontact_ap7,-ep2+spf.ep_w,0) | if(!incontact_ap7,test(-ep2),0) | Lagrange (Linear) | Boundary 40 | Elemental |
| if(!incontact_ap7,-ep2+spf.ep_w,0) | if(!incontact_ap7,test(-ep2),0) | Lagrange (Linear) | Boundary 2  | Elemental |

### 2.4.8 Pressure Point Constraint 1

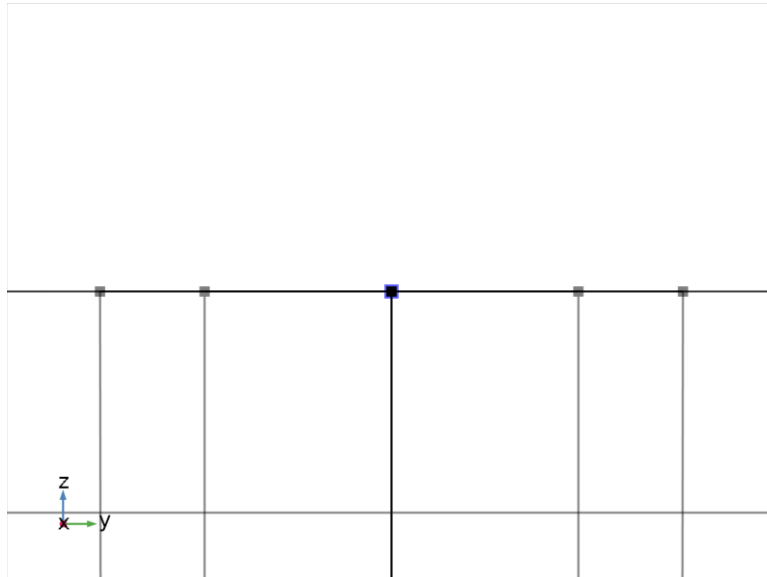

Pressure Point Constraint 1

#### SELECTION

|                        |                                      |
|------------------------|--------------------------------------|
| Geometric entity level | Point                                |
| Selection              | Geometry geom1: Dimension 0: Point 1 |

#### EQUATIONS

$$p2 = (p_0 + p_{\text{hydro}})$$

$$p_{\text{hydro}} = \rho_{\text{ref}} \mathbf{g} \cdot (\mathbf{r} - \mathbf{r}_{\text{ref}})$$

## Pressure constraint

#### SETTINGS

| Description                         | Value |
|-------------------------------------|-------|
| Pressure                            | 0     |
| Compensate for hydrostatic pressure | On    |

## Variables

| Name | Expression | Unit | Description | Selection |
|------|------------|------|-------------|-----------|
|------|------------|------|-------------|-----------|

| Name   | Expression  | Unit | Description | Selection |
|--------|-------------|------|-------------|-----------|
| spf.p0 | spf.p_hydro | Pa   | Pressure    | Point 1   |

# Constraints

| Constraint | Constraint force | Shape function    | Selection | Details   |
|------------|------------------|-------------------|-----------|-----------|
| -p2+spf.p0 | test(-p2)        | Lagrange (Linear) | Point 1   | Elemental |

# 2.5 MESH 1

## MESH STATISTICS

| Description             | Value   |
|-------------------------|---------|
| Minimum element quality | 0.01932 |
| Average element quality | 0.6647  |
| Tetrahedron             | 1562119 |
| Pyramid                 | 6402    |
| Prism                   | 121636  |
| Triangle                | 82260   |
| Quad                    | 80      |
| Edge element            | 6192    |
| Vertex element          | 359     |

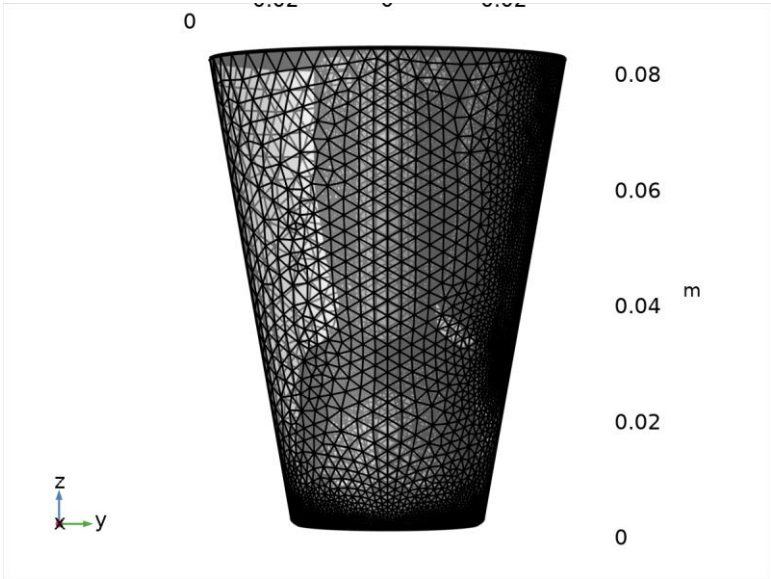

Mesh 1

# 2.5.1 Size (size)

## SETTINGS

| Description | Value |
|-------------|-------|
|-------------|-------|

| Description                  | Value          |
|------------------------------|----------------|
| Calibrate for                | Fluid dynamics |
| Maximum element size         | 0.005          |
| Minimum element size         | mf1            |
| Curvature factor             | 0.6            |
| Resolution of narrow regions | 0.7            |
| Maximum element growth rate  | 1.15           |
| Custom element size          | Custom         |

## 2.5.2 Rührer (size1)

### SELECTION

|                        |                                                                                    |
|------------------------|------------------------------------------------------------------------------------|
| Geometric entity level | Boundary                                                                           |
| Selection              | Geometry geom1: Dimension 2: Boundaries 41–94, 103–109, 112–137, 143, 146, 150–212 |

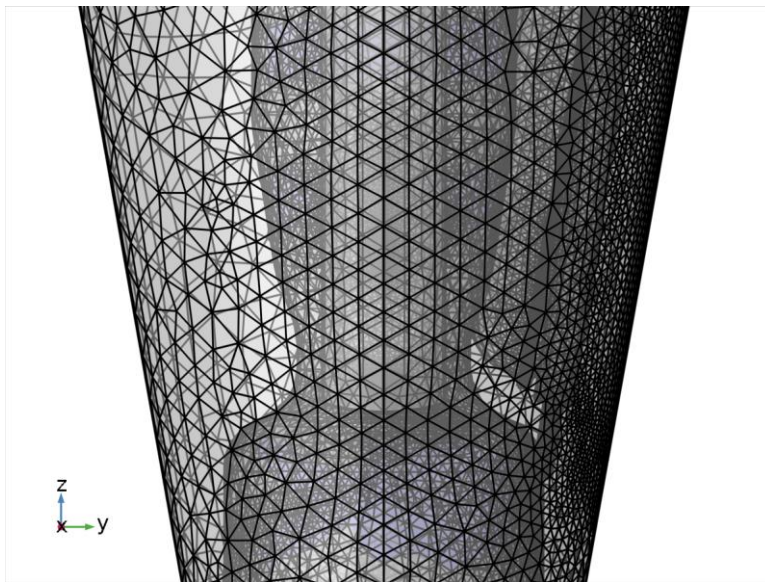

*Rührer*

### SETTINGS

| Description                  | Value          |
|------------------------------|----------------|
| Calibrate for                | Fluid dynamics |
| Maximum element size         | 3E-3           |
| Minimum element size         | mf2            |
| Curvature factor             | 0.6            |
| Resolution of narrow regions | 0.7            |
| Maximum element growth rate  | 1.2            |

| Description         | Value  |
|---------------------|--------|
| Predefined size     | Finer  |
| Custom element size | Custom |

### 2.5.3 Shaft+Sonden (size2)

#### SELECTION

|                        |                                                                                                                               |
|------------------------|-------------------------------------------------------------------------------------------------------------------------------|
| Geometric entity level | Boundary                                                                                                                      |
| Selection              | Geometry geom1: Dimension 2: Boundaries 3–7, 9–10, 12–14, 16–18, 20–21, 23, 25–39, 95–102, 110–112, 138–142, 144–145, 147–149 |

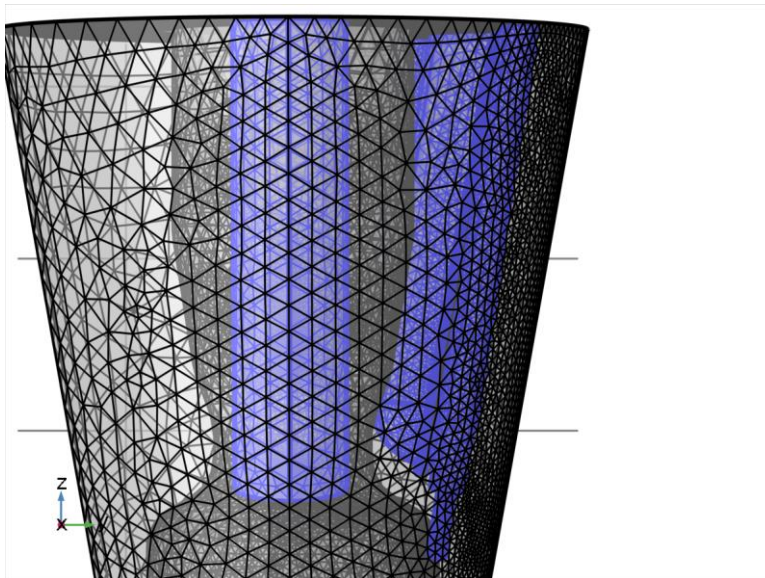

*Shaft+Sonden*

#### SETTINGS

| Description                  | Value          |
|------------------------------|----------------|
| Calibrate for                | Fluid dynamics |
| Maximum element size         | 0.003          |
| Minimum element size         | 1E-5           |
| Curvature factor             | 0.4            |
| Resolution of narrow regions | 0.7            |
| Maximum element growth rate  | 1.2            |
| Custom element size          | Custom         |

### 2.5.4 Rotationsgebiet (size3)

#### SELECTION

|                        |          |
|------------------------|----------|
| Geometric entity level | Boundary |
|------------------------|----------|

|           |                                          |
|-----------|------------------------------------------|
| Selection | Geometry geom1: Dimension 2: Boundary 40 |
|-----------|------------------------------------------|

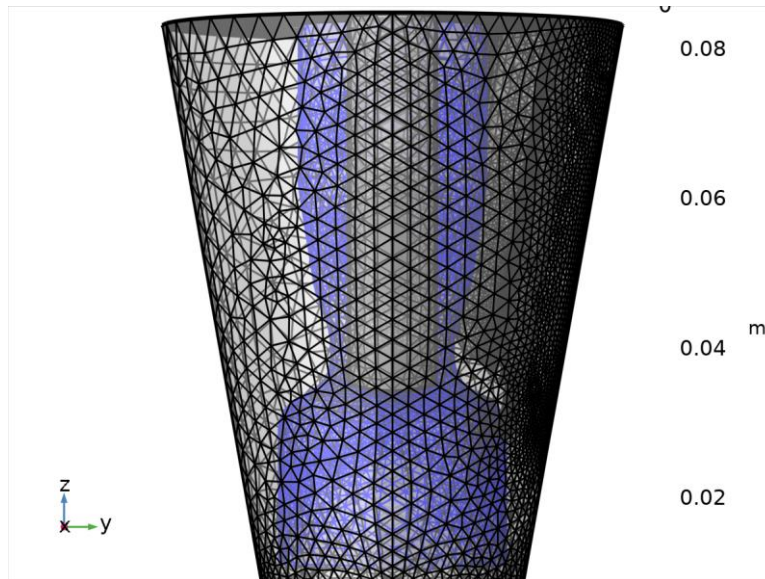

*Rotationsgebiet*

#### SETTINGS

| Description                  | Value          |
|------------------------------|----------------|
| Calibrate for                | Fluid dynamics |
| Maximum element size         | 0.003          |
| Minimum element size         | mf2            |
| Curvature factor             | 0.6            |
| Resolution of narrow regions | 0.7            |
| Maximum element growth rate  | 1.2            |
| Custom element size          | Custom         |

### 2.5.5 Corner Refinement 1 (cr1)

#### SELECTION

|                        |                                          |
|------------------------|------------------------------------------|
| Geometric entity level | Domain                                   |
| Selection              | Geometry geom1: Dimension 3: Domains 1–2 |



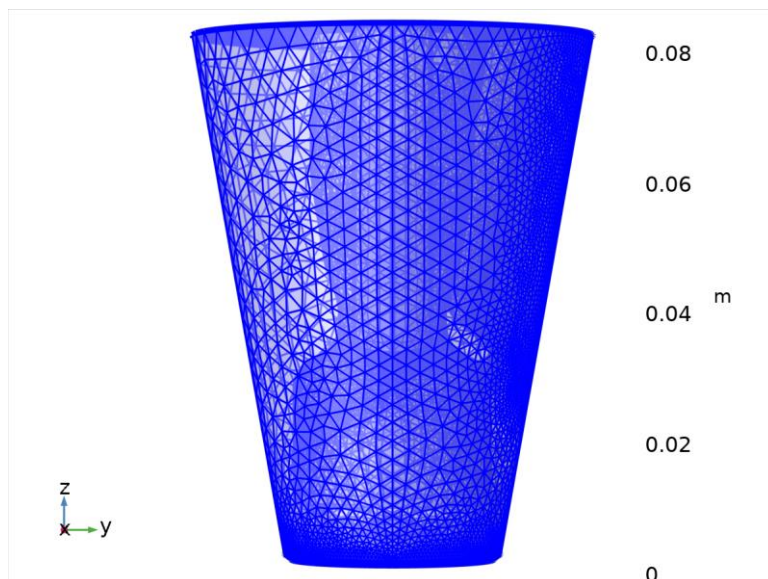

*Corner Refinement 1*

## 2.5.6 Free Tetrahedral 1 (ftet1)

### SELECTION

|                        |                                       |
|------------------------|---------------------------------------|
| Geometric entity level | Domain                                |
| Selection              | Geometry geom1: Dimension 3: Domain 2 |

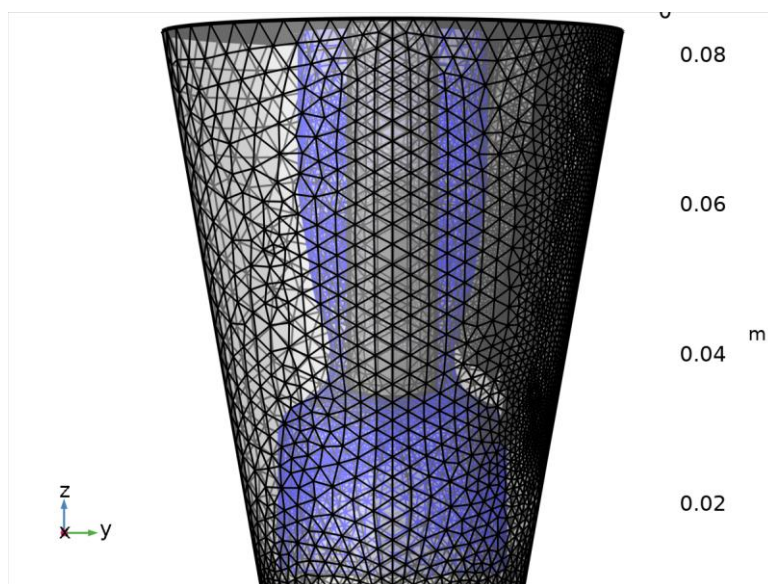

*Free Tetrahedral 1*

## Size 1 (size1)

### SELECTION

|                        |        |
|------------------------|--------|
| Geometric entity level | Domain |
|------------------------|--------|

|           |                                       |
|-----------|---------------------------------------|
| Selection | Geometry geom1: Dimension 3: Domain 2 |
|-----------|---------------------------------------|

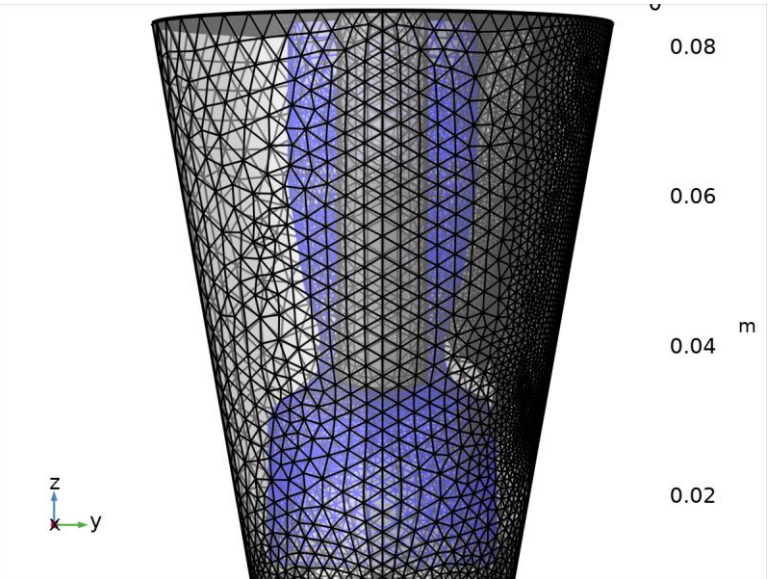

Size 1

SETTINGS

| Description                  | Value          |
|------------------------------|----------------|
| Calibrate for                | Fluid dynamics |
| Maximum element size         | 0.003          |
| Minimum element size         | mf1            |
| Curvature factor             | 0.6            |
| Resolution of narrow regions | 0.7            |
| Maximum element growth rate  | 1.2            |
| Custom element size          | Custom         |

2.5.7 Free Tetrahedral 2 (ftet2)

SELECTION

|                        |           |
|------------------------|-----------|
| Geometric entity level | Domain    |
| Selection              | Remaining |



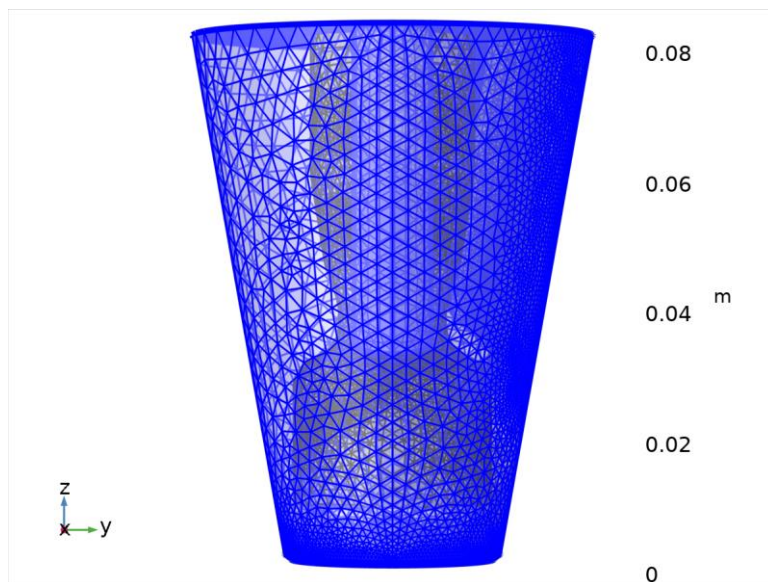

*Free Tetrahedral 2*

## 2.5.8 Boundary Layers 1 (bl1)

### SELECTION

|                        |                |
|------------------------|----------------|
| Geometric entity level | Domain         |
| Selection              | Geometry geom1 |

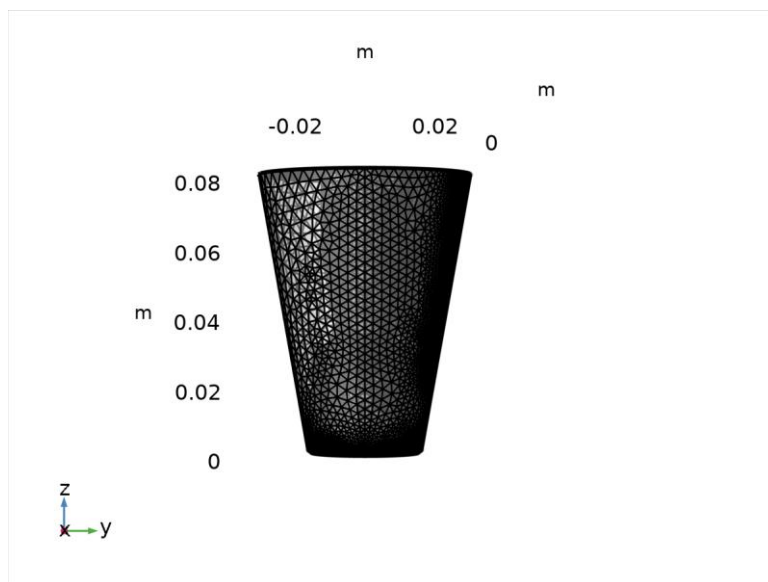

*Boundary Layers 1*

### SETTINGS

| Description             | Value    |
|-------------------------|----------|
| Handling of sharp edges | Trimming |

## Boundary Layer Properties 1 (blp1)

### SELECTION

|                        |                                                |
|------------------------|------------------------------------------------|
| Geometric entity level | Boundary                                       |
| Selection              | Geometry geom1: Dimension 2: Boundaries 41–212 |

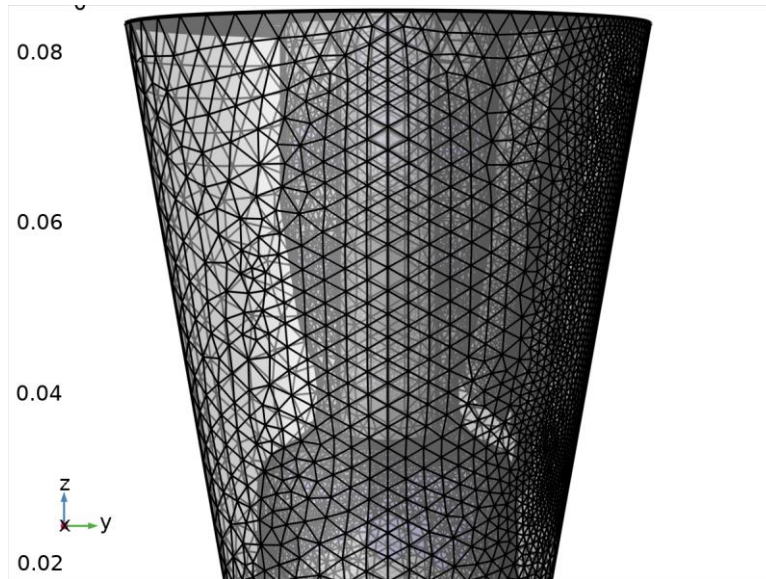

### Boundary Layer Properties 1

### SETTINGS

| Description                 | Value |
|-----------------------------|-------|
| Number of boundary layers   | 5     |
| Thickness adjustment factor | 2     |

### 3 Study 1

#### COMPUTATION INFORMATION

|                  |                                                |
|------------------|------------------------------------------------|
| Computation time | 32 h 55 min 40 s                               |
| CPU              | Intel64 Family 6 Model 158 Stepping 9, 4 cores |
| Operating system | Windows 10                                     |

#### 3.1 SWEEP GESCHWINDIGKEIT

| Parameter name | Parameter value list | Parameter unit |
|----------------|----------------------|----------------|
| f              | range(50,50,600)     | rpm            |

#### STUDY SETTINGS

| Description    | Value            |
|----------------|------------------|
| Sweep type     | All combinations |
| Parameter name | f                |
| Unit           | rpm              |

#### PARAMETERS

| Parameter name | Parameter value list | Parameter unit |
|----------------|----------------------|----------------|
| f              | range(50,50,600)     | rpm            |

#### 3.2 SWEEP MESH

| Parameter name | Parameter value list        | Parameter unit |
|----------------|-----------------------------|----------------|
| mf1            | range(8.0e-5,5.0e-6,1.2e-4) | m              |
| mf2            | range(8.0e-6,5.0e-6,1.2e-5) | m              |

#### STUDY SETTINGS

| Description    | Value                  |
|----------------|------------------------|
| Sweep type     | Specified combinations |
| Parameter name | {mf1, mf2}             |
| Unit           | {m, m}                 |

#### PARAMETERS

| Parameter name | Parameter value list        | Parameter unit |
|----------------|-----------------------------|----------------|
| mf1            | range(8.0e-5,5.0e-6,1.2e-4) | m              |
| mf2            | range(8.0e-6,5.0e-6,1.2e-5) | m              |

#### 3.3 FROZEN ROTOR

#### STUDY SETTINGS

| Description                    | Value |
|--------------------------------|-------|
| Include geometric nonlinearity | On    |

#### PHYSICS AND VARIABLES SELECTION

| Physics interface                   | Discretization |
|-------------------------------------|----------------|
| Turbulent Flow, k- $\epsilon$ (spf) | physics        |

#### MESH SELECTION

| Geometry           | Mesh  |
|--------------------|-------|
| Geometry 1 (geom1) | mesh1 |

### 3.4 SOLVER CONFIGURATIONS

#### 3.4.1 Solution 1

##### Compile Equations: Frozen Rotor (st1)

#### STUDY AND STEP

| Description    | Value                        |
|----------------|------------------------------|
| Use study      | <a href="#">Study 1</a>      |
| Use study step | <a href="#">Frozen Rotor</a> |

#### LOG

```
<---- Compile Equations: Frozen Rotor in Study 1/Solution 1 (sol1) -----
Started at Feb 23, 2021 11:41:58 AM.
Geometry shape order: Linear
Running on 2 x Intel(R) Xeon(R) CPU E5-2680 v4 at 2.40 GHz.
Using 2 sockets with 24 cores in total on g133.
Available memory: 128.55 GB.
Time: 5 s.
Physical memory: 1.21 GB
Virtual memory: 10.57 GB
Ended at Feb 23, 2021 11:42:03 AM.
----- Compile Equations: Frozen Rotor in Study 1/Solution 1 (sol1) ----->
```

##### Dependent Variables 1 (v1)

#### GENERAL

| Description           | Value                        |
|-----------------------|------------------------------|
| Defined by study step | <a href="#">Frozen Rotor</a> |

#### INITIAL VALUE CALCULATION CONSTANTS

| Constant name | Initial value source  |
|---------------|-----------------------|
| f             | range(50,50,600)[rpm] |

#### LOG

```

<---- Dependent Variables 1 in Study 1/Solution 1 (sol1) -----
Started at Feb 23, 2021 11:42:03 AM.
Solution time: 1 s.
Physical memory: 2.09 GB
Virtual memory: 10.68 GB
Ended at Feb 23, 2021 11:42:04 AM.
----- Dependent Variables 1 in Study 1/Solution 1 (sol1) ----->

```

#### Turbulent dissipation rate (comp1.ep2) (comp1\_ep2)

##### GENERAL

| Description      | Value     |
|------------------|-----------|
| Field components | comp1.ep2 |

#### Turbulent kinetic energy (comp1.k2) (comp1\_k2)

##### GENERAL

| Description      | Value    |
|------------------|----------|
| Field components | comp1.k2 |

#### Pressure (comp1.p2) (comp1\_p2)

##### GENERAL

| Description      | Value    |
|------------------|----------|
| Field components | comp1.p2 |

#### Velocity field (spatial frame) (comp1.u) (comp1\_u)

##### GENERAL

| Description        | Value                          |
|--------------------|--------------------------------|
| Field components   | {comp1.u, comp1.v, comp1.w}    |
| Internal variables | comp1.spf.isFluidHasBeenSolved |

#### Stationary Solver 1 (s1)

##### GENERAL

| Description           | Value                        |
|-----------------------|------------------------------|
| Defined by study step | <a href="#">Frozen Rotor</a> |

##### LOG

93, 4.3e+04

Pseudo time-stepping CFL-ratio:

0.29

Segregated solver iteration 98.

Velocity u, Pressure p2

| Iter | SolEst | Damping   | Stepsize | #Res | #Jac | #Sol | LinIt | LinErr  | LinRes |
|------|--------|-----------|----------|------|------|------|-------|---------|--------|
| 1    | 0.23   | 0.5000000 | 0.23     | 2493 | 1241 | 1241 | 15403 | 0.00083 | 7e-05  |

Turbulence variables

| Iter | SolEst | ResEst  | Damping   | Stepsize | #Res  | #Jac | #Sol | LinIt | LinErr |         |
|------|--------|---------|-----------|----------|-------|------|------|-------|--------|---------|
| 1    | 0.065  | 5.9e+04 | 0.3500000 |          | 0.065 | 6095 | 3602 | 3602  | 19360  | 0.00065 |
| -    |        |         |           |          |       |      |      |       |        |         |
| 2    | 0.048  | 4.7e+04 | 0.3500000 |          | 0.048 | 6096 | 3603 | 3603  | 19365  | 0.00086 |
| -    |        |         |           |          |       |      |      |       |        |         |
| 3    | 0.037  | 4e+04   | 0.3500000 |          | 0.037 | 6097 | 3604 | 3604  | 19370  | 0.00071 |
| -    |        |         |           |          |       |      |      |       |        |         |

Solution error estimates for segregated groups

0.12, 0.054

Residual error estimates for segregated groups

86, 4e+04

Pseudo time-stepping CFL-ratio:

0.28

Segregated solver iteration 99.

Velocity u, Pressure p2

| Iter | SolEst | Damping   | Stepsize | #Res | #Jac | #Sol | LinIt | LinErr  | LinRes  |
|------|--------|-----------|----------|------|------|------|-------|---------|---------|
| 1    | 0.24   | 0.5000000 | 0.24     | 2495 | 1242 | 1242 | 15419 | 0.00075 | 6.8e-05 |

Turbulence variables

| Iter | SolEst | ResEst  | Damping   | Stepsize | #Res  | #Jac | #Sol | LinIt | LinErr |         |
|------|--------|---------|-----------|----------|-------|------|------|-------|--------|---------|
| 1    | 0.064  | 5.8e+04 | 0.3500000 |          | 0.064 | 6100 | 3605 | 3605  | 19378  | 0.00066 |
| -    |        |         |           |          |       |      |      |       |        |         |
| 2    | 0.048  | 4.6e+04 | 0.3500000 |          | 0.048 | 6101 | 3606 | 3606  | 19383  | 0.00086 |
| -    |        |         |           |          |       |      |      |       |        |         |
| 3    | 0.038  | 3.7e+04 | 0.3500000 |          | 0.038 | 6102 | 3607 | 3607  | 19388  | 0.0007  |
| -    |        |         |           |          |       |      |      |       |        |         |

Solution error estimates for segregated groups

0.12, 0.054

Residual error estimates for segregated groups

82, 3.7e+04

Pseudo time-stepping CFL-ratio:

0.28

Segregated solver iteration 100.

Velocity u, Pressure p2

| Iter | SolEst | Damping   | Stepsize | #Res | #Jac | #Sol | LinIt | LinErr  | LinRes  |
|------|--------|-----------|----------|------|------|------|-------|---------|---------|
| 1    | 0.23   | 0.5000000 | 0.23     | 2497 | 1243 | 1243 | 15435 | 0.00084 | 6.8e-05 |

Turbulence variables

| Iter | SolEst | ResEst  | Damping   | Stepsize | #Res  | #Jac | #Sol | LinIt | LinErr |         |
|------|--------|---------|-----------|----------|-------|------|------|-------|--------|---------|
| 1    | 0.063  | 5.7e+04 | 0.3500000 |          | 0.063 | 6105 | 3608 | 3608  | 19396  | 0.00068 |
| -    |        |         |           |          |       |      |      |       |        |         |
| 2    | 0.048  | 4.4e+04 | 0.3500000 |          | 0.048 | 6106 | 3609 | 3609  | 19401  | 0.00085 |
| -    |        |         |           |          |       |      |      |       |        |         |
| 3    | 0.039  | 3.5e+04 | 0.3500000 |          | 0.039 | 6107 | 3610 | 3610  | 19406  | 0.00071 |
| -    |        |         |           |          |       |      |      |       |        |         |

Solution error estimates for segregated groups

0.12, 0.055

Residual error estimates for segregated groups

80, 3.5e+04

Pseudo time-stepping CFL-ratio:

0.28

Segregated solver iteration 101.

Velocity u, Pressure p2

| Iter | SolEst | Damping   | Stepsize | #Res | #Jac | #Sol | LinIt | LinErr  | LinRes  |
|------|--------|-----------|----------|------|------|------|-------|---------|---------|
| 1    | 0.23   | 0.5000000 | 0.23     | 2499 | 1244 | 1244 | 15451 | 0.00095 | 8.6e-05 |

Turbulence variables

| Iter | SolEst | ResEst  | Damping   | Stepsize | #Res  | #Jac | #Sol | LinIt | LinErr |         |
|------|--------|---------|-----------|----------|-------|------|------|-------|--------|---------|
| 1    | 0.063  | 5.4e+04 | 0.3500000 |          | 0.063 | 6110 | 3611 | 3611  | 19414  | 0.00066 |
| -    |        |         |           |          |       |      |      |       |        |         |
| 2    | 0.049  | 4.2e+04 | 0.3500000 |          | 0.049 | 6111 | 3612 | 3612  | 19419  | 0.0009  |
| -    |        |         |           |          |       |      |      |       |        |         |
| 3    | 0.041  | 3.3e+04 | 0.3500000 |          | 0.041 | 6112 | 3613 | 3613  | 19424  | 0.00076 |
| -    |        |         |           |          |       |      |      |       |        |         |

Solution error estimates for segregated groups

0.11, 0.055

Residual error estimates for segregated groups

79, 3.3e+04

Pseudo time-stepping CFL-ratio:

0.28

Segregated solver iteration 102.

Velocity u, Pressure p2

| Iter | SolEst | Damping   | Stepsize | #Res | #Jac | #Sol | LinIt | LinErr | LinRes  |
|------|--------|-----------|----------|------|------|------|-------|--------|---------|
| 1    | 0.26   | 0.5000000 | 0.26     | 2501 | 1245 | 1245 | 15467 | 0.0009 | 7.1e-05 |

Turbulence variables

| Iter | SolEst | ResEst  | Damping   | Stepsize | #Res  | #Jac | #Sol | LinIt | LinErr |         |
|------|--------|---------|-----------|----------|-------|------|------|-------|--------|---------|
| 1    | 0.066  | 5.2e+04 | 0.3500000 |          | 0.066 | 6115 | 3614 | 3614  | 19432  | 0.00065 |
| -    |        |         |           |          |       |      |      |       |        |         |
| 2    | 0.053  | 4.1e+04 | 0.3500000 |          | 0.053 | 6116 | 3615 | 3615  | 19438  | 0.00048 |
| -    |        |         |           |          |       |      |      |       |        |         |
| 3    | 0.044  | 3.3e+04 | 0.3500000 |          | 0.044 | 6117 | 3616 | 3616  | 19443  | 0.00084 |
| -    |        |         |           |          |       |      |      |       |        |         |

Solution error estimates for segregated groups

0.13, 0.056

Residual error estimates for segregated groups

1.5e+02, 3.3e+04

Pseudo time-stepping CFL-ratio:

0.28

Segregated solver iteration 103.

Velocity u, Pressure p2

| Iter | SolEst | Damping   | Stepsize | #Res | #Jac | #Sol | LinIt | LinErr  | LinRes  |
|------|--------|-----------|----------|------|------|------|-------|---------|---------|
| 1    | 0.19   | 0.5000000 | 0.19     | 2503 | 1246 | 1246 | 15483 | 0.00067 | 2.2e-05 |

Turbulence variables

| Iter | SolEst | ResEst  | Damping   | Stepsize | #Res  | #Jac | #Sol | LinIt | LinErr |         |
|------|--------|---------|-----------|----------|-------|------|------|-------|--------|---------|
| 1    | 0.051  | 4.5e+04 | 0.3500000 |          | 0.051 | 6120 | 3617 | 3617  | 19450  | 0.00093 |
| -    |        |         |           |          |       |      |      |       |        |         |
| 2    | 0.042  | 3.6e+04 | 0.3500000 |          | 0.042 | 6121 | 3618 | 3618  | 19455  | 0.00077 |
| -    |        |         |           |          |       |      |      |       |        |         |
| 3    | 0.036  | 2.9e+04 | 0.3500000 |          | 0.036 | 6122 | 3619 | 3619  | 19460  | 0.00066 |
| -    |        |         |           |          |       |      |      |       |        |         |

Solution error estimates for segregated groups

0.096, 0.045

Residual error estimates for segregated groups

97, 2.9e+04

Pseudo time-stepping CFL-ratio:

0.28

Segregated solver iteration 104.

Velocity u, Pressure p2

| Iter | SolEst | Damping   | Stepsize | #Res | #Jac | #Sol | LinIt | LinErr  | LinRes |
|------|--------|-----------|----------|------|------|------|-------|---------|--------|
| 1    | 0.2    | 0.5000000 | 0.2      | 2505 | 1247 | 1247 | 15495 | 0.00099 | -      |

Turbulence variables

| Iter | SolEst | ResEst  | Damping   | Stepsize | #Res  | #Jac | #Sol | LinIt | LinErr |
|------|--------|---------|-----------|----------|-------|------|------|-------|--------|
| 1    | 0.053  | 4.4e+04 | 0.3500000 |          | 0.053 | 6125 | 3620 | 3620  | 19467  |
| 2    | 0.043  | 3.5e+04 | 0.3500000 |          | 0.043 | 6126 | 3621 | 3621  | 19472  |
| 3    | 0.036  | 2.9e+04 | 0.3500000 |          | 0.036 | 6127 | 3622 | 3622  | 19477  |

Solution error estimates for segregated groups

0.1, 0.047

Residual error estimates for segregated groups

77, 2.9e+04

Pseudo time-stepping CFL-ratio:

0.3

Segregated solver iteration 105.

Velocity u, Pressure p2

| Iter | SolEst | Damping   | Stepsize | #Res | #Jac | #Sol | LinIt | LinErr | LinRes  |
|------|--------|-----------|----------|------|------|------|-------|--------|---------|
| 1    | 0.17   | 0.5000000 | 0.17     | 2507 | 1248 | 1248 | 15512 | 0.0008 | 4.4e-05 |

Turbulence variables

| Iter | SolEst | ResEst  | Damping   | Stepsize | #Res  | #Jac | #Sol | LinIt | LinErr |
|------|--------|---------|-----------|----------|-------|------|------|-------|--------|
| 1    | 0.045  | 4e+04   | 0.3500000 |          | 0.045 | 6130 | 3623 | 3623  | 19484  |
| 2    | 0.037  | 3.2e+04 | 0.3500000 |          | 0.037 | 6131 | 3624 | 3624  | 19489  |
| 3    | 0.03   | 2.7e+04 | 0.3500000 |          | 0.03  | 6132 | 3625 | 3625  | 19494  |

Solution error estimates for segregated groups

0.085, 0.04

Residual error estimates for segregated groups

67, 2.7e+04

Pseudo time-stepping CFL-ratio:

0.3

Segregated solver iteration 106.

Velocity u, Pressure p2

| Iter | SolEst | Damping   | Stepsize | #Res | #Jac | #Sol | LinIt | LinErr  | LinRes |
|------|--------|-----------|----------|------|------|------|-------|---------|--------|
| 1    | 0.16   | 0.5000000 | 0.16     | 2509 | 1249 | 1249 | 15525 | 0.00092 | -      |

Turbulence variables

| Iter | SolEst | ResEst  | Damping   | Stepsize | #Res  | #Jac | #Sol | LinIt | LinErr |
|------|--------|---------|-----------|----------|-------|------|------|-------|--------|
| 1    | 0.042  | 3.9e+04 | 0.3500000 |          | 0.042 | 6135 | 3626 | 3626  | 19501  |
| 2    | 0.032  | 3.1e+04 | 0.3500000 |          | 0.032 | 6136 | 3627 | 3627  | 19506  |
| 3    | 0.026  | 2.5e+04 | 0.3500000 |          | 0.026 | 6137 | 3628 | 3628  | 19511  |



Solution error estimates for segregated groups

0.081, 0.035

Residual error estimates for segregated groups

63, 2.5e+04

Pseudo time-stepping CFL-ratio:

0.31

Segregated solver iteration 107.

Velocity u, Pressure p2

| Iter | SolEst | Damping   | Stepsize | #Res | #Jac | #Sol | LinIt | LinErr  | LinRes |
|------|--------|-----------|----------|------|------|------|-------|---------|--------|
| 1    | 0.15   | 0.5000000 | 0.15     | 2511 | 1250 | 1250 | 15539 | 0.00058 | -      |

Turbulence variables

| Iter   | SolEst | ResEst  | Damping   | Stepsize | #Res  | #Jac | #Sol | LinIt | LinErr |         |
|--------|--------|---------|-----------|----------|-------|------|------|-------|--------|---------|
| LinRes |        |         |           |          |       |      |      |       |        |         |
| 1      | 0.038  | 3.7e+04 | 0.3500000 |          | 0.038 | 6140 | 3629 | 3629  | 19518  | 0.00091 |
| -      |        |         |           |          |       |      |      |       |        |         |
| 2      | 0.029  | 2.9e+04 | 0.3500000 |          | 0.029 | 6141 | 3630 | 3630  | 19523  | 0.00079 |
| -      |        |         |           |          |       |      |      |       |        |         |
| 3      | 0.023  | 2.4e+04 | 0.3500000 |          | 0.023 | 6142 | 3631 | 3631  | 19528  | 0.00065 |
| -      |        |         |           |          |       |      |      |       |        |         |

Solution error estimates for segregated groups

0.074, 0.031

Residual error estimates for segregated groups

60, 2.4e+04

Pseudo time-stepping CFL-ratio:

0.32

Segregated solver iteration 108.

Velocity u, Pressure p2

| Iter | SolEst | Damping   | Stepsize | #Res | #Jac | #Sol | LinIt | LinErr  | LinRes |
|------|--------|-----------|----------|------|------|------|-------|---------|--------|
| 1    | 0.16   | 0.5000000 | 0.16     | 2513 | 1251 | 1251 | 15553 | 0.00064 | -      |

Turbulence variables

| Iter   | SolEst | ResEst  | Damping   | Stepsize | #Res  | #Jac | #Sol | LinIt | LinErr |         |
|--------|--------|---------|-----------|----------|-------|------|------|-------|--------|---------|
| LinRes |        |         |           |          |       |      |      |       |        |         |
| 1      | 0.044  | 3.5e+04 | 0.3500000 |          | 0.044 | 6145 | 3632 | 3632  | 19535  | 0.001   |
| -      |        |         |           |          |       |      |      |       |        |         |
| 2      | 0.034  | 2.8e+04 | 0.3500000 |          | 0.034 | 6146 | 3633 | 3633  | 19540  | 0.00093 |
| -      |        |         |           |          |       |      |      |       |        |         |
| 3      | 0.026  | 2.2e+04 | 0.3500000 |          | 0.026 | 6147 | 3634 | 3634  | 19545  | 0.00077 |
| -      |        |         |           |          |       |      |      |       |        |         |

Solution error estimates for segregated groups

0.079, 0.036

Residual error estimates for segregated groups

57, 2.2e+04

Pseudo time-stepping CFL-ratio:

0.33

Segregated solver iteration 109.

Velocity u, Pressure p2

| Iter | SolEst | Damping   | Stepsize | #Res | #Jac | #Sol | LinIt | LinErr  | LinRes |
|------|--------|-----------|----------|------|------|------|-------|---------|--------|
| 1    | 0.16   | 0.5000000 | 0.16     | 2515 | 1252 | 1252 | 15566 | 0.00065 | -      |

Turbulence variables

| Iter   | SolEst | ResEst  | Damping   | Stepsize | #Res  | #Jac | #Sol | LinIt | LinErr |         |
|--------|--------|---------|-----------|----------|-------|------|------|-------|--------|---------|
| LinRes |        |         |           |          |       |      |      |       |        |         |
| 1      | 0.049  | 3.2e+04 | 0.3500000 |          | 0.049 | 6150 | 3635 | 3635  | 19552  | 0.00091 |
| -      |        |         |           |          |       |      |      |       |        |         |
| 2      | 0.037  | 2.5e+04 | 0.3500000 |          | 0.037 | 6151 | 3636 | 3636  | 19557  | 0.00092 |
| -      |        |         |           |          |       |      |      |       |        |         |

3 0.029 2e+04 0.3500000 0.029 6152 3637 3637 19562 0.00077

-

Solution error estimates for segregated groups

0.079, 0.04

Residual error estimates for segregated groups

53, 2e+04

Pseudo time-stepping CFL-ratio:

0.32

Segregated solver iteration 110.

Velocity u, Pressure p2

| Iter | SolEst | Damping   | Stepsize | #Res | #Jac | #Sol | LinIt | LinErr  | LinRes |
|------|--------|-----------|----------|------|------|------|-------|---------|--------|
| 1    | 0.16   | 0.5000000 | 0.16     | 2517 | 1253 | 1253 | 15578 | 0.00087 | -      |

Turbulence variables

| Iter   | SolEst | ResEst  | Damping   | Stepsize | #Res | #Jac | #Sol | LinIt | LinErr  |
|--------|--------|---------|-----------|----------|------|------|------|-------|---------|
| LinRes |        |         |           |          |      |      |      |       |         |
| 1      | 0.05   | 2.9e+04 | 0.3500000 | 0.05     | 6155 | 3638 | 3638 | 19569 | 0.00086 |
| -      |        |         |           |          |      |      |      |       |         |
| 2      | 0.037  | 2.3e+04 | 0.3500000 | 0.037    | 6156 | 3639 | 3639 | 19574 | 0.0009  |
| -      |        |         |           |          |      |      |      |       |         |
| 3      | 0.029  | 1.9e+04 | 0.3500000 | 0.029    | 6157 | 3640 | 3640 | 19579 | 0.00077 |
| -      |        |         |           |          |      |      |      |       |         |

Solution error estimates for segregated groups

0.079, 0.04

Residual error estimates for segregated groups

49, 1.9e+04

Pseudo time-stepping CFL-ratio:

0.33

Segregated solver iteration 111.

Velocity u, Pressure p2

| Iter | SolEst | Damping   | Stepsize | #Res | #Jac | #Sol | LinIt | LinErr  | LinRes |
|------|--------|-----------|----------|------|------|------|-------|---------|--------|
| 1    | 0.15   | 0.5000000 | 0.15     | 2519 | 1254 | 1254 | 15590 | 0.00091 | -      |

Turbulence variables

| Iter   | SolEst | ResEst  | Damping   | Stepsize | #Res | #Jac | #Sol | LinIt | LinErr  |
|--------|--------|---------|-----------|----------|------|------|------|-------|---------|
| LinRes |        |         |           |          |      |      |      |       |         |
| 1      | 0.045  | 2.6e+04 | 0.3500000 | 0.045    | 6160 | 3641 | 3641 | 19586 | 0.00085 |
| -      |        |         |           |          |      |      |      |       |         |
| 2      | 0.034  | 2.2e+04 | 0.3500000 | 0.034    | 6161 | 3642 | 3642 | 19591 | 0.00088 |
| -      |        |         |           |          |      |      |      |       |         |
| 3      | 0.026  | 1.9e+04 | 0.3500000 | 0.026    | 6162 | 3643 | 3643 | 19596 | 0.00077 |
| -      |        |         |           |          |      |      |      |       |         |

Solution error estimates for segregated groups

0.073, 0.037

Residual error estimates for segregated groups

44, 1.9e+04

Pseudo time-stepping CFL-ratio:

0.33

Segregated solver iteration 112.

Velocity u, Pressure p2

| Iter | SolEst | Damping   | Stepsize | #Res | #Jac | #Sol | LinIt | LinErr  | LinRes |
|------|--------|-----------|----------|------|------|------|-------|---------|--------|
| 1    | 0.14   | 0.5000000 | 0.14     | 2521 | 1255 | 1255 | 15603 | 0.00067 | -      |

Turbulence variables

| Iter   | SolEst | ResEst  | Damping   | Stepsize | #Res | #Jac | #Sol | LinIt | LinErr  |
|--------|--------|---------|-----------|----------|------|------|------|-------|---------|
| LinRes |        |         |           |          |      |      |      |       |         |
| 1      | 0.04   | 2.4e+04 | 0.3500000 | 0.04     | 6165 | 3644 | 3644 | 19603 | 0.00092 |
| -      |        |         |           |          |      |      |      |       |         |

-

```

2          0.03      2.1e+04   0.3500000      0.03 6166 3645 3645 19608 0.00086
-
3          0.024     1.9e+04   0.3500000      0.024 6167 3646 3646 19613 0.00077
-

```

Solution error estimates for segregated groups

0.068, 0.033

Residual error estimates for segregated groups

41, 1.9e+04

Pseudo time-stepping CFL-ratio:

0.34

Segregated solver iteration 113.

Velocity u, Pressure p2

| Iter | SolEst | Damping   | Stepsize | #Res | #Jac | #Sol | LinIt | LinErr  | LinRes |
|------|--------|-----------|----------|------|------|------|-------|---------|--------|
| 1    | 0.13   | 0.5000000 | 0.13     | 2523 | 1256 | 1256 | 15616 | 0.00089 | -      |

Turbulence variables

| Iter   | SolEst | ResEst  | Damping   | Stepsize | #Res | #Jac | #Sol | LinIt | LinErr  |
|--------|--------|---------|-----------|----------|------|------|------|-------|---------|
| LinRes |        |         |           |          |      |      |      |       |         |
| 1      | 0.036  | 2.3e+04 | 0.3500000 | 0.036    | 6170 | 3647 | 3647 | 19620 | 0.00096 |
| -      |        |         |           |          |      |      |      |       |         |
| 2      | 0.027  | 2.1e+04 | 0.3500000 | 0.027    | 6171 | 3648 | 3648 | 19625 | 0.00082 |
| -      |        |         |           |          |      |      |      |       |         |
| 3      | 0.022  | 1.9e+04 | 0.3500000 | 0.022    | 6172 | 3649 | 3649 | 19630 | 0.00075 |
| -      |        |         |           |          |      |      |      |       |         |

Solution error estimates for segregated groups

0.064, 0.03

Residual error estimates for segregated groups

37, 1.9e+04

Pseudo time-stepping CFL-ratio:

0.35

Segregated solver iteration 114.

Velocity u, Pressure p2

| Iter | SolEst | Damping   | Stepsize | #Res | #Jac | #Sol | LinIt | LinErr  | LinRes |
|------|--------|-----------|----------|------|------|------|-------|---------|--------|
| 1    | 0.12   | 0.5000000 | 0.12     | 2525 | 1257 | 1257 | 15630 | 0.00064 | -      |

Turbulence variables

| Iter   | SolEst | ResEst  | Damping   | Stepsize | #Res | #Jac | #Sol | LinIt | LinErr  |
|--------|--------|---------|-----------|----------|------|------|------|-------|---------|
| LinRes |        |         |           |          |      |      |      |       |         |
| 1      | 0.035  | 2.2e+04 | 0.3500000 | 0.035    | 6175 | 3650 | 3650 | 19637 | 0.00096 |
| -      |        |         |           |          |      |      |      |       |         |
| 2      | 0.026  | 2e+04   | 0.3500000 | 0.026    | 6176 | 3651 | 3651 | 19642 | 0.00079 |
| -      |        |         |           |          |      |      |      |       |         |
| 3      | 0.021  | 1.9e+04 | 0.3500000 | 0.021    | 6177 | 3652 | 3652 | 19647 | 0.00074 |
| -      |        |         |           |          |      |      |      |       |         |

Solution error estimates for segregated groups

0.061, 0.029

Residual error estimates for segregated groups

34, 1.9e+04

Pseudo time-stepping CFL-ratio:

0.36

Segregated solver iteration 115.

Velocity u, Pressure p2

| Iter | SolEst | Damping   | Stepsize | #Res | #Jac | #Sol | LinIt | LinErr  | LinRes |
|------|--------|-----------|----------|------|------|------|-------|---------|--------|
| 1    | 0.11   | 0.5000000 | 0.11     | 2527 | 1258 | 1258 | 15644 | 0.00064 | -      |

Turbulence variables

| Iter   | SolEst | ResEst | Damping | Stepsize | #Res | #Jac | #Sol | LinIt | LinErr |
|--------|--------|--------|---------|----------|------|------|------|-------|--------|
| LinRes |        |        |         |          |      |      |      |       |        |

|   |       |         |           |       |      |      |      |       |         |
|---|-------|---------|-----------|-------|------|------|------|-------|---------|
| 1 | 0.034 | 2.1e+04 | 0.3500000 | 0.034 | 6180 | 3653 | 3653 | 19654 | 0.00091 |
| - |       |         |           |       |      |      |      |       |         |
| 2 | 0.025 | 1.9e+04 | 0.3500000 | 0.025 | 6181 | 3654 | 3654 | 19659 | 0.00076 |
| - |       |         |           |       |      |      |      |       |         |
| 3 | 0.02  | 1.8e+04 | 0.3500000 | 0.02  | 6182 | 3655 | 3655 | 19664 | 0.00071 |
| - |       |         |           |       |      |      |      |       |         |

Solution error estimates for segregated groups

0.056, 0.028

Residual error estimates for segregated groups

30, 1.8e+04

Pseudo time-stepping CFL-ratio:

0.36

Segregated solver iteration 116.

Velocity u, Pressure p2

| Iter | SolEst | Damping   | Stepsize | #Res | #Jac | #Sol | LinIt | LinErr  | LinRes |
|------|--------|-----------|----------|------|------|------|-------|---------|--------|
| 1    | 0.097  | 0.5000000 | 0.097    | 2529 | 1259 | 1259 | 15658 | 0.00075 | -      |

Turbulence variables

| Iter   | SolEst | ResEst  | Damping   | Stepsize | #Res | #Jac | #Sol | LinIt | LinErr  |
|--------|--------|---------|-----------|----------|------|------|------|-------|---------|
| LinRes |        |         |           |          |      |      |      |       |         |
| 1      | 0.032  | 2e+04   | 0.3500000 | 0.032    | 6185 | 3656 | 3656 | 19671 | 0.00087 |
| -      |        |         |           |          |      |      |      |       |         |
| 2      | 0.023  | 1.8e+04 | 0.3500000 | 0.023    | 6186 | 3657 | 3657 | 19676 | 0.00073 |
| -      |        |         |           |          |      |      |      |       |         |
| 3      | 0.018  | 1.7e+04 | 0.3500000 | 0.018    | 6187 | 3658 | 3658 | 19681 | 0.00067 |
| -      |        |         |           |          |      |      |      |       |         |

Solution error estimates for segregated groups

0.048, 0.026

Residual error estimates for segregated groups

26, 1.7e+04

Pseudo time-stepping CFL-ratio:

0.37

Segregated solver iteration 117.

Velocity u, Pressure p2

| Iter | SolEst | Damping   | Stepsize | #Res | #Jac | #Sol | LinIt | LinErr  | LinRes |
|------|--------|-----------|----------|------|------|------|-------|---------|--------|
| 1    | 0.08   | 0.5000000 | 0.08     | 2531 | 1260 | 1260 | 15673 | 0.00099 | -      |

Turbulence variables

| Iter   | SolEst | ResEst  | Damping   | Stepsize | #Res | #Jac | #Sol | LinIt | LinErr  |
|--------|--------|---------|-----------|----------|------|------|------|-------|---------|
| LinRes |        |         |           |          |      |      |      |       |         |
| 1      | 0.028  | 1.8e+04 | 0.3500000 | 0.028    | 6190 | 3659 | 3659 | 19688 | 0.00085 |
| -      |        |         |           |          |      |      |      |       |         |
| 2      | 0.021  | 1.6e+04 | 0.3500000 | 0.021    | 6191 | 3660 | 3660 | 19693 | 0.00069 |
| -      |        |         |           |          |      |      |      |       |         |
| 3      | 0.016  | 1.5e+04 | 0.3500000 | 0.016    | 6192 | 3661 | 3661 | 19698 | 0.00063 |
| -      |        |         |           |          |      |      |      |       |         |

Solution error estimates for segregated groups

0.04, 0.023

Residual error estimates for segregated groups

23, 1.5e+04

Pseudo time-stepping CFL-ratio:

0.39

Segregated solver iteration 118.

Velocity u, Pressure p2

| Iter | SolEst | Damping   | Stepsize | #Res | #Jac | #Sol | LinIt | LinErr  | LinRes |
|------|--------|-----------|----------|------|------|------|-------|---------|--------|
| 1    | 0.065  | 0.5000000 | 0.065    | 2533 | 1261 | 1261 | 15690 | 0.00083 | -      |

Turbulence variables

| Iter   | SolEst | ResEst  | Damping   | Stepsize | #Res | #Jac | #Sol | LinIt | LinErr  |
|--------|--------|---------|-----------|----------|------|------|------|-------|---------|
| LinRes |        |         |           |          |      |      |      |       |         |
| 1      | 0.025  | 1.6e+04 | 0.3500000 | 0.025    | 6195 | 3662 | 3662 | 19705 | 0.00088 |
| -      |        |         |           |          |      |      |      |       |         |
| 2      | 0.018  | 1.4e+04 | 0.3500000 | 0.018    | 6196 | 3663 | 3663 | 19710 | 0.00065 |
| -      |        |         |           |          |      |      |      |       |         |
| 3      | 0.014  | 1.3e+04 | 0.3500000 | 0.014    | 6197 | 3664 | 3664 | 19715 | 0.00058 |
| -      |        |         |           |          |      |      |      |       |         |

Solution error estimates for segregated groups

0.033, 0.02

Residual error estimates for segregated groups

22, 1.3e+04

Pseudo time-stepping CFL-ratio:

0.41

Segregated solver iteration 119.

Velocity u, Pressure p2

| Iter | SolEst | Damping   | Stepsize | #Res | #Jac | #Sol | LinIt | LinErr  | LinRes |
|------|--------|-----------|----------|------|------|------|-------|---------|--------|
| 1    | 0.054  | 0.5000000 | 0.054    | 2535 | 1262 | 1262 | 15708 | 0.00094 | -      |

Turbulence variables

| Iter   | SolEst | ResEst  | Damping   | Stepsize | #Res | #Jac | #Sol | LinIt | LinErr  |
|--------|--------|---------|-----------|----------|------|------|------|-------|---------|
| LinRes |        |         |           |          |      |      |      |       |         |
| 1      | 0.022  | 1.4e+04 | 0.3500000 | 0.022    | 6200 | 3665 | 3665 | 19722 | 0.00093 |
| -      |        |         |           |          |      |      |      |       |         |
| 2      | 0.016  | 1.2e+04 | 0.3500000 | 0.016    | 6201 | 3666 | 3666 | 19727 | 0.00062 |
| -      |        |         |           |          |      |      |      |       |         |
| 3      | 0.013  | 1.1e+04 | 0.3500000 | 0.013    | 6202 | 3667 | 3667 | 19732 | 0.00052 |
| -      |        |         |           |          |      |      |      |       |         |

Solution error estimates for segregated groups

0.027, 0.018

Residual error estimates for segregated groups

21, 1.1e+04

Pseudo time-stepping CFL-ratio:

0.43

Segregated solver iteration 120.

Velocity u, Pressure p2

| Iter | SolEst | Damping   | Stepsize | #Res | #Jac | #Sol | LinIt | LinErr  | LinRes |
|------|--------|-----------|----------|------|------|------|-------|---------|--------|
| 1    | 0.046  | 0.5000000 | 0.046    | 2537 | 1263 | 1263 | 15727 | 0.00096 | -      |

Turbulence variables

| Iter   | SolEst | ResEst  | Damping   | Stepsize | #Res | #Jac | #Sol | LinIt | LinErr  |
|--------|--------|---------|-----------|----------|------|------|------|-------|---------|
| LinRes |        |         |           |          |      |      |      |       |         |
| 1      | 0.019  | 1.3e+04 | 0.3500000 | 0.019    | 6205 | 3668 | 3668 | 19739 | 0.00089 |
| -      |        |         |           |          |      |      |      |       |         |
| 2      | 0.014  | 1e+04   | 0.3500000 | 0.014    | 6206 | 3669 | 3669 | 19744 | 0.00053 |
| -      |        |         |           |          |      |      |      |       |         |
| 3      | 0.011  | 9.1e+03 | 0.3500000 | 0.011    | 6207 | 3670 | 3670 | 19748 | 0.00088 |
| -      |        |         |           |          |      |      |      |       |         |

Solution error estimates for segregated groups

0.023, 0.015

Residual error estimates for segregated groups

20, 9.1e+03

Pseudo time-stepping CFL-ratio:

0.45

Segregated solver iteration 121.

Velocity u, Pressure p2

| Iter | SolEst | Damping   | Stepsize | #Res | #Jac | #Sol | LinIt | LinErr  | LinRes |
|------|--------|-----------|----------|------|------|------|-------|---------|--------|
| 1    | 0.039  | 0.5000000 | 0.039    | 2539 | 1264 | 1264 | 15747 | 0.00089 | -      |

Turbulence variables

| Iter   | SolEst | ResEst  | Damping   | Stepsize | #Res | #Jac | #Sol | LinIt | LinErr  |
|--------|--------|---------|-----------|----------|------|------|------|-------|---------|
| LinRes |        |         |           |          |      |      |      |       |         |
| 1      | 0.016  | 1.1e+04 | 0.3500000 | 0.016    | 6210 | 3671 | 3671 | 19755 | 0.00075 |
| -      |        |         |           |          |      |      |      |       |         |
| 2      | 0.012  | 8.7e+03 | 0.3500000 | 0.012    | 6211 | 3672 | 3672 | 19759 | 0.00081 |
| -      |        |         |           |          |      |      |      |       |         |
| 3      | 0.0088 | 7.4e+03 | 0.3500000 | 0.0088   | 6212 | 3673 | 3673 | 19763 | 0.00071 |
| -      |        |         |           |          |      |      |      |       |         |

Solution error estimates for segregated groups

0.019, 0.013

Residual error estimates for segregated groups

20, 7.4e+03

Pseudo time-stepping CFL-ratio:

0.47

Segregated solver iteration 122.

Velocity u, Pressure p2

| Iter | SolEst | Damping   | Stepsize | #Res | #Jac | #Sol | LinIt | LinErr  | LinRes |
|------|--------|-----------|----------|------|------|------|-------|---------|--------|
| 1    | 0.032  | 0.5000000 | 0.032    | 2541 | 1265 | 1265 | 15768 | 0.00073 | -      |

Turbulence variables

| Iter   | SolEst | ResEst  | Damping   | Stepsize | #Res | #Jac | #Sol | LinIt | LinErr  |
|--------|--------|---------|-----------|----------|------|------|------|-------|---------|
| LinRes |        |         |           |          |      |      |      |       |         |
| 1      | 0.012  | 9.3e+03 | 0.3500000 | 0.012    | 6215 | 3674 | 3674 | 19770 | 0.00055 |
| -      |        |         |           |          |      |      |      |       |         |
| 2      | 0.0089 | 7.4e+03 | 0.3500000 | 0.0089   | 6216 | 3675 | 3675 | 19774 | 0.00063 |
| -      |        |         |           |          |      |      |      |       |         |
| 3      | 0.0068 | 6.2e+03 | 0.3500000 | 0.0068   | 6217 | 3676 | 3676 | 19778 | 0.00058 |
| -      |        |         |           |          |      |      |      |       |         |

Solution error estimates for segregated groups

0.016, 0.0096

Residual error estimates for segregated groups

19, 6.2e+03

Pseudo time-stepping CFL-ratio:

0.49

Segregated solver iteration 123.

Velocity u, Pressure p2

| Iter | SolEst | Damping   | Stepsize | #Res | #Jac | #Sol | LinIt | LinErr  | LinRes |
|------|--------|-----------|----------|------|------|------|-------|---------|--------|
| 1    | 0.026  | 0.5000000 | 0.026    | 2543 | 1266 | 1266 | 15789 | 0.00081 | -      |

Turbulence variables

| Iter   | SolEst | ResEst  | Damping   | Stepsize | #Res | #Jac | #Sol | LinIt | LinErr  |
|--------|--------|---------|-----------|----------|------|------|------|-------|---------|
| LinRes |        |         |           |          |      |      |      |       |         |
| 1      | 0.0092 | 8.1e+03 | 0.3500000 | 0.0092   | 6220 | 3677 | 3677 | 19784 | 0.00081 |
| -      |        |         |           |          |      |      |      |       |         |
| 2      | 0.0067 | 6.4e+03 | 0.3500000 | 0.0067   | 6221 | 3678 | 3678 | 19788 | 0.00053 |
| -      |        |         |           |          |      |      |      |       |         |
| 3      | 0.0052 | 5.4e+03 | 0.3500000 | 0.0052   | 6222 | 3679 | 3679 | 19792 | 0.0005  |
| -      |        |         |           |          |      |      |      |       |         |

Solution error estimates for segregated groups

0.013, 0.0072

Residual error estimates for segregated groups

18, 5.4e+03

Pseudo time-stepping CFL-ratio:

0.52

Segregated solver iteration 124.

Velocity u, Pressure p2

| Iter | SolEst | Damping | Stepsize | #Res | #Jac | #Sol | LinIt | LinErr | LinRes |
|------|--------|---------|----------|------|------|------|-------|--------|--------|
|------|--------|---------|----------|------|------|------|-------|--------|--------|

```

1      0.02  0.5000000      0.02 2545 1267 1267 15810  0.00087      -
Turbulence variables
Iter      SolEst      ResEst      Damping      Stepsize #Res #Jac #Sol LinIt      LinErr
LinRes
1      0.0068      6.9e+03  0.3500000      0.0068 6225 3680 3680 19798  0.00068
-
2      0.005      5.6e+03  0.3500000      0.005 6226 3681 3681 19802  0.00046
-
3      0.004      4.9e+03  0.3500000      0.004 6227 3682 3682 19806  0.00044
-
Solution error estimates for segregated groups
0.0099, 0.0054
Residual error estimates for segregated groups
16, 4.9e+03
Pseudo time-stepping CFL-ratio:
0.55
Segregated solver iteration 125.
Velocity u, Pressure p2
Iter      SolEst      Damping      Stepsize #Res #Jac #Sol LinIt      LinErr      LinRes
1      0.014  0.5000000      0.014 2547 1268 1268 15830  0.00096      -
Turbulence variables
Iter      SolEst      ResEst      Damping      Stepsize #Res #Jac #Sol LinIt      LinErr
LinRes
1      0.005      5.7e+03  0.3500000      0.005 6230 3683 3683 19812  0.00056
-
2      0.0037      4.9e+03  0.3500000      0.0037 6231 3684 3684 19815  0.00098
-
3      0.0031      4.5e+03  0.3500000      0.0031 6232 3685 3685 19818  0.001
-
Solution error estimates for segregated groups
0.0072, 0.004
Residual error estimates for segregated groups
14, 4.5e+03
Pseudo time-stepping CFL-ratio:
0.58
Segregated solver iteration 126.
Velocity u, Pressure p2
Iter      SolEst      Damping      Stepsize #Res #Jac #Sol LinIt      LinErr      LinRes
1      0.01  0.5000000      0.01 2549 1269 1269 15848  0.00094      -
Turbulence variables
Iter      SolEst      ResEst      Damping      Stepsize #Res #Jac #Sol LinIt      LinErr
LinRes
1      0.0038      4.6e+03  0.3500000      0.0038 6235 3686 3686 19823  0.00085
-
2      0.0029      4.2e+03  0.3500000      0.0029 6236 3687 3687 19826  0.00086
-
3      0.0024      4e+03  0.3500000      0.0024 6237 3688 3688 19829  0.00088
-
Solution error estimates for segregated groups
0.0051, 0.0031
Residual error estimates for segregated groups
11, 4e+03
Pseudo time-stepping CFL-ratio:
0.62
Segregated solver iteration 127.
Velocity u, Pressure p2

```

| Iter | SolEst | Damping   | Stepsize | #Res | #Jac | #Sol | LinIt | LinErr  | LinRes |
|------|--------|-----------|----------|------|------|------|-------|---------|--------|
| 1    | 0.0087 | 0.5000000 | 0.0087   | 2551 | 1270 | 1270 | 15869 | 0.00086 | -      |

Turbulence variables

| Iter | SolEst | ResEst  | Damping   | Stepsize | #Res | #Jac | #Sol | LinIt | LinErr  |
|------|--------|---------|-----------|----------|------|------|------|-------|---------|
| 1    | 0.0032 | 3.9e+03 | 0.3500000 | 0.0032   | 6240 | 3689 | 3689 | 19834 | 0.00077 |
| 2    | 0.0024 | 3.7e+03 | 0.3500000 | 0.0024   | 6241 | 3690 | 3690 | 19837 | 0.00076 |
| 3    | 0.002  | 3.6e+03 | 0.3500000 | 0.002    | 6242 | 3691 | 3691 | 19840 | 0.00079 |

Solution error estimates for segregated groups  
0.0044, 0.0026  
Residual error estimates for segregated groups  
8.9, 3.6e+03  
Pseudo time-stepping CFL-ratio:  
0.66  
Segregated solver iteration 128.  
Velocity u, Pressure p2

| Iter | SolEst | Damping   | Stepsize | #Res | #Jac | #Sol | LinIt | LinErr  | LinRes |
|------|--------|-----------|----------|------|------|------|-------|---------|--------|
| 1    | 0.0086 | 0.5000000 | 0.0086   | 2553 | 1271 | 1271 | 15890 | 0.00095 | -      |

Turbulence variables

| Iter | SolEst | ResEst  | Damping   | Stepsize | #Res | #Jac | #Sol | LinIt | LinErr  |
|------|--------|---------|-----------|----------|------|------|------|-------|---------|
| 1    | 0.0029 | 3.5e+03 | 0.3500000 | 0.0029   | 6245 | 3692 | 3692 | 19845 | 0.00075 |
| 2    | 0.0021 | 3.3e+03 | 0.3500000 | 0.0021   | 6246 | 3693 | 3693 | 19848 | 0.00067 |
| 3    | 0.0017 | 3.2e+03 | 0.3500000 | 0.0017   | 6247 | 3694 | 3694 | 19851 | 0.00071 |

Solution error estimates for segregated groups  
0.0043, 0.0023  
Residual error estimates for segregated groups  
7.1, 3.2e+03  
Pseudo time-stepping CFL-ratio:  
0.68  
Segregated solver iteration 129.  
Velocity u, Pressure p2

| Iter | SolEst | Damping   | Stepsize | #Res | #Jac | #Sol | LinIt | LinErr  | LinRes |
|------|--------|-----------|----------|------|------|------|-------|---------|--------|
| 1    | 0.008  | 0.5000000 | 0.008    | 2555 | 1272 | 1272 | 15911 | 0.00079 | -      |

Turbulence variables

| Iter | SolEst | ResEst  | Damping   | Stepsize | #Res | #Jac | #Sol | LinIt | LinErr  |
|------|--------|---------|-----------|----------|------|------|------|-------|---------|
| 1    | 0.0026 | 3.1e+03 | 0.3500000 | 0.0026   | 6250 | 3695 | 3695 | 19856 | 0.0007  |
| 2    | 0.0018 | 2.9e+03 | 0.3500000 | 0.0018   | 6251 | 3696 | 3696 | 19859 | 0.00058 |
| 3    | 0.0015 | 2.7e+03 | 0.3500000 | 0.0015   | 6252 | 3697 | 3697 | 19862 | 0.00062 |

Solution error estimates for segregated groups  
0.004, 0.002  
Residual error estimates for segregated groups  
5.8, 2.7e+03  
Pseudo time-stepping CFL-ratio:  
0.71  
Segregated solver iteration 130.



Velocity u, Pressure p2

| Iter | SolEst | Damping   | Stepsize | #Res | #Jac | #Sol | LinIt | LinErr  | LinRes |
|------|--------|-----------|----------|------|------|------|-------|---------|--------|
| 1    | 0.0068 | 0.5000000 | 0.0068   | 2557 | 1273 | 1273 | 15931 | 0.00086 | -      |

Turbulence variables

| Iter | SolEst | ResEst  | Damping   | Stepsize | #Res | #Jac | #Sol | LinIt | LinErr  | LinRes |
|------|--------|---------|-----------|----------|------|------|------|-------|---------|--------|
| 1    | 0.0022 | 2.7e+03 | 0.3500000 | 0.0022   | 6255 | 3698 | 3698 | 19867 | 0.00062 | -      |
| 2    | 0.0015 | 2.5e+03 | 0.3500000 | 0.0015   | 6256 | 3699 | 3699 | 19870 | 0.0005  | -      |
| 3    | 0.0012 | 2.3e+03 | 0.3500000 | 0.0012   | 6257 | 3700 | 3700 | 19873 | 0.00054 | -      |

Solution error estimates for segregated groups

0.0034, 0.0016

Residual error estimates for segregated groups

4.9, 2.3e+03

Pseudo time-stepping CFL-ratio:

0.73

Segregated solver iteration 131.

Velocity u, Pressure p2

| Iter | SolEst | Damping   | Stepsize | #Res | #Jac | #Sol | LinIt | LinErr  | LinRes |
|------|--------|-----------|----------|------|------|------|-------|---------|--------|
| 1    | 0.0053 | 0.5000000 | 0.0053   | 2559 | 1274 | 1274 | 15950 | 0.00084 | -      |

Turbulence variables

| Iter | SolEst  | ResEst  | Damping   | Stepsize | #Res | #Jac | #Sol | LinIt | LinErr  | LinRes |
|------|---------|---------|-----------|----------|------|------|------|-------|---------|--------|
| 1    | 0.0017  | 2.3e+03 | 0.3500000 | 0.0017   | 6260 | 3701 | 3701 | 19878 | 0.00051 | -      |
| 2    | 0.0012  | 2e+03   | 0.3500000 | 0.0012   | 6261 | 3702 | 3702 | 19880 | 0.00095 | -      |
| 3    | 0.00095 | 1.9e+03 | 0.3500000 | 0.00095  | 6262 | 3703 | 3703 | 19883 | 0.0005  | -      |

Solution error estimates for segregated groups

0.0027, 0.0013

Residual error estimates for segregated groups

4.1, 1.9e+03

Pseudo time-stepping CFL-ratio:

0.77

Segregated solver iteration 132.

Velocity u, Pressure p2

| Iter | SolEst | Damping   | Stepsize | #Res | #Jac | #Sol | LinIt | LinErr  | LinRes |
|------|--------|-----------|----------|------|------|------|-------|---------|--------|
| 1    | 0.004  | 0.5000000 | 0.004    | 2561 | 1275 | 1275 | 15968 | 0.00084 | -      |

Turbulence variables

| Iter | SolEst  | ResEst  | Damping   | Stepsize | #Res | #Jac | #Sol | LinIt | LinErr  | LinRes |
|------|---------|---------|-----------|----------|------|------|------|-------|---------|--------|
| 1    | 0.0013  | 1.8e+03 | 0.3500000 | 0.0013   | 6265 | 3704 | 3704 | 19887 | 0.00078 | -      |
| 2    | 0.00089 | 1.6e+03 | 0.3500000 | 0.00089  | 6266 | 3705 | 3705 | 19889 | 0.00076 | -      |

Solution error estimates for segregated groups

0.002, 0.00084

Residual error estimates for segregated groups

3.1, 1.6e+03

Pseudo time-stepping CFL-ratio:

0.8

Segregated solver iteration 133.

Velocity u, Pressure p2

| Iter | SolEst | Damping   | Stepsize | #Res | #Jac | #Sol | LinIt | LinErr  | LinRes |
|------|--------|-----------|----------|------|------|------|-------|---------|--------|
| 1    | 0.0026 | 0.5000000 | 0.0026   | 2563 | 1276 | 1276 | 15983 | 0.00095 | -      |

Turbulence variables

| Iter | SolEst  | ResEst  | Damping   | Stepsize | #Res | #Jac | #Sol | LinIt | LinErr  |
|------|---------|---------|-----------|----------|------|------|------|-------|---------|
| 1    | 0.0011  | 1.6e+03 | 0.3500000 | 0.0011   | 6269 | 3706 | 3706 | 19893 | 0.00068 |
| 2    | 0.00076 | 1.4e+03 | 0.3500000 | 0.00076  | 6270 | 3707 | 3707 | 19895 | 0.00066 |

-

Solution error estimates for segregated groups  
0.0013, 0.00071

Residual error estimates for segregated groups  
2.3, 1.4e+03

Pseudo time-stepping CFL-ratio:  
0.85

Segregated solver iteration 134.

Velocity u, Pressure p2

| Iter | SolEst | Damping   | Stepsize | #Res | #Jac | #Sol | LinIt | LinErr  | LinRes |
|------|--------|-----------|----------|------|------|------|-------|---------|--------|
| 1    | 0.0018 | 0.5000000 | 0.0018   | 2565 | 1277 | 1277 | 15996 | 0.00088 | -      |

Turbulence variables

| Iter | SolEst  | ResEst  | Damping   | Stepsize | #Res | #Jac | #Sol | LinIt | LinErr  |
|------|---------|---------|-----------|----------|------|------|------|-------|---------|
| 1    | 0.00085 | 1.3e+03 | 0.3500000 | 0.00085  | 6273 | 3708 | 3708 | 19899 | 0.00054 |

-

Solution error estimates for segregated groups  
0.00092, 0.00055

Residual error estimates for segregated groups  
1.6, 1.3e+03

Pseudo time-stepping CFL-ratio:  
0.9

Segregated solver iteration 135.

Velocity u, Pressure p2

| Iter | SolEst | Damping   | Stepsize | #Res | #Jac | #Sol | LinIt | LinErr  | LinRes |
|------|--------|-----------|----------|------|------|------|-------|---------|--------|
| 1    | 0.0012 | 0.5000000 | 0.0012   | 2567 | 1278 | 1278 | 16006 | 0.00098 | -      |

Turbulence variables

| Iter | SolEst  | ResEst  | Damping   | Stepsize | #Res | #Jac | #Sol | LinIt | LinErr  |
|------|---------|---------|-----------|----------|------|------|------|-------|---------|
| 1    | 0.00077 | 1.2e+03 | 0.3500000 | 0.00077  | 6276 | 3709 | 3709 | 19902 | 0.00096 |

-

Solution error estimates for segregated groups  
0.00062, 0.0005

Residual error estimates for segregated groups  
1.2, 1.2e+03

Pseudo time-stepping CFL-ratio:  
0.95

Segregated solver iteration 136.

Velocity u, Pressure p2

| Iter | SolEst  | Damping   | Stepsize | #Res | #Jac | #Sol | LinIt | LinErr  | LinRes |
|------|---------|-----------|----------|------|------|------|-------|---------|--------|
| 1    | 0.00087 | 0.5000000 | 0.00087  | 2569 | 1279 | 1279 | 16015 | 0.00083 | -      |

Turbulence variables

| Iter | SolEst  | ResEst  | Damping   | Stepsize | #Res | #Jac | #Sol | LinIt | LinErr  |
|------|---------|---------|-----------|----------|------|------|------|-------|---------|
| 1    | 0.00067 | 1.1e+03 | 0.3500000 | 0.00067  | 6279 | 3710 | 3710 | 19905 | 0.00088 |

-

Solution error estimates for segregated groups  
0.00044, 0.00044

```

Residual error estimates for segregated groups
0.87, 1.1e+03
Pseudo time-stepping CFL-ratio:
1
Segregated solver iteration 137.
Velocity u, Pressure p2
Iter      SolEst      Damping      Stepsize #Res #Jac #Sol LinIt   LinErr   LinRes
  1      0.00059    0.5000000    0.00059 2571 1280 1280 16022 0.00091    -
Turbulence variables
Iter      SolEst      ResEst      Damping      Stepsize #Res #Jac #Sol LinIt   LinErr
LinRes
  1      0.00057    9.4e+02    0.3500000    0.00057 6282 3711 3711 19908 0.00077
-
Solution error estimates for segregated groups
0.0003, 0.00037
Residual error estimates for segregated groups
0.69, 9.4e+02
Pseudo time-stepping CFL-ratio:
1
Solution time: 118534 s. (1 day, 8 hours, 55 minutes, 34 seconds)
Physical memory: 13.52 GB
Virtual memory: 21.52 GB
Ended at Feb 24, 2021 8:37:38 PM.
----- Stationary Solver 1 in Study 1/Solution 1 (sol1) ----->

```

## Advanced (aDef)

### ASSEMBLY SETTINGS

| Description            | Value |
|------------------------|-------|
| Reuse sparsity pattern | On    |

## Parametric 1 (p1)

### GENERAL

| Description           | Value                                 |
|-----------------------|---------------------------------------|
| Defined by study step | <a href="#">Sweep Geschwindigkeit</a> |
| Sweep type            | All combinations                      |
| Run continuation for  | No parameter                          |

### PARAMETERS

| Parameter name | Parameter value list | Parameter unit |
|----------------|----------------------|----------------|
| f              | range(50,50,600)     | rpm            |

## Segregated 1 (se1)

### GENERAL

| Description                    | Value                |
|--------------------------------|----------------------|
| Maximum number of iterations   | 400                  |
| Stabilization and acceleration | Pseudo time-stepping |

| Description        | Value |
|--------------------|-------|
| Initial CFL number | 3     |

#### Velocity u, Pressure p2 (ss1)

##### GENERAL

| Description   | Value                                                           |
|---------------|-----------------------------------------------------------------|
| Variables     | {Velocity field (spatial frame) (comp1.u), Pressure (comp1.p2)} |
| Linear solver | <a href="#">AMG, fluid flow variables (spf)</a>                 |

##### METHOD AND TERMINATION

| Description    | Value |
|----------------|-------|
| Damping factor | 0.5   |

#### Turbulence variables (ss2)

##### GENERAL

| Description   | Value                                                                         |
|---------------|-------------------------------------------------------------------------------|
| Variables     | {Turbulent kinetic energy (comp1.k2), Turbulent dissipation rate (comp1.ep2)} |
| Linear solver | <a href="#">AMG, turbulence variables (spf)</a>                               |

##### METHOD AND TERMINATION

| Description           | Value                   |
|-----------------------|-------------------------|
| Damping factor        | 0.35                    |
| Termination technique | Iterations or tolerance |
| Number of iterations  | 3                       |
| Tolerance factor      | 1                       |

#### Lower Limit 1 (ll1)

##### LOWER LIMIT

| Description                    | Value                  |
|--------------------------------|------------------------|
| Lower limits (field variables) | comp1.k2 0 comp1.ep2 0 |

#### AMG, fluid flow variables (spf) (i1)

##### GENERAL

| Description                  | Value |
|------------------------------|-------|
| Nonlinear-based error norm   | On    |
| Maximum number of iterations | 200   |

##### ERROR

| Description              | Value |
|--------------------------|-------|
| Factor in error estimate | 20    |

### Multigrid 1 (mg1)

#### GENERAL

| Description                              | Value                    |
|------------------------------------------|--------------------------|
| Solver                                   | Smoothed aggregation AMG |
| Maximum number of DOFs at coarsest level | 80000                    |
| Strength of connections                  | 0.02                     |
| Construct prolongators componentwise     | On                       |
| Prolongator smoothing                    | Off                      |

### Presmoothing (pr)

#### SCGS 1 (sc1)

#### MAIN

| Description              | Value |
|--------------------------|-------|
| Sweep type               | SSOR  |
| Number of iterations     | 0     |
| Vertex relaxation factor | 0.7   |

### Postsmoothing (po)

#### SCGS 1 (sc1)

#### MAIN

| Description              | Value |
|--------------------------|-------|
| Sweep type               | SSOR  |
| Number of iterations     | 1     |
| Vertex relaxation factor | 0.7   |

### Coarse Solver (cs)

#### Direct 1 (d1)

#### GENERAL

| Description           | Value   |
|-----------------------|---------|
| Solver                | PARDISO |
| Pivoting perturbation | 1.0E-13 |

### AMG, turbulence variables (spf) (i2)

#### GENERAL

| Description                  | Value |
|------------------------------|-------|
| Nonlinear-based error norm   | On    |
| Maximum number of iterations | 200   |

#### ERROR

| Description              | Value |
|--------------------------|-------|
| Factor in error estimate | 20    |

#### Multigrid 1 (mg1)

##### GENERAL

| Description                              | Value                    |
|------------------------------------------|--------------------------|
| Solver                                   | Smoothed aggregation AMG |
| Maximum number of DOFs at coarsest level | 50000                    |
| Construct prolongators componentwise     | On                       |
| Prolongator smoothing                    | Off                      |

#### Presmoothing (pr)

##### SOR Line 1 (sl1)

##### MAIN

| Description          | Value     |
|----------------------|-----------|
| Sweep type           | SSOR      |
| Number of iterations | 0         |
| Relaxation factor    | 0.7       |
| Multivariable method | Uncoupled |

##### SECONDARY

| Description       | Value |
|-------------------|-------|
| Relaxation factor | 0.5   |

#### Postsmoothing (po)

##### SOR Line 1 (sl1)

##### MAIN

| Description          | Value     |
|----------------------|-----------|
| Sweep type           | SSOR      |
| Number of iterations | 1         |
| Relaxation factor    | 0.7       |
| Multivariable method | Uncoupled |

##### SECONDARY

| Description       | Value |
|-------------------|-------|
| Relaxation factor | 0.5   |

#### Coarse Solver (cs)

##### Direct 1 (d1)

##### GENERAL

| Description           | Value   |
|-----------------------|---------|
| Solver                | PARDISO |
| Pivoting perturbation | 1.0E-13 |

## 4 Results

### 4.1 DATASETS

#### 4.1.1 Study 1/Solution 1

##### SOLUTION

| Description | Value                      |
|-------------|----------------------------|
| Solution    | <a href="#">Solution 1</a> |
| Component   | Save Point Geometry 1      |

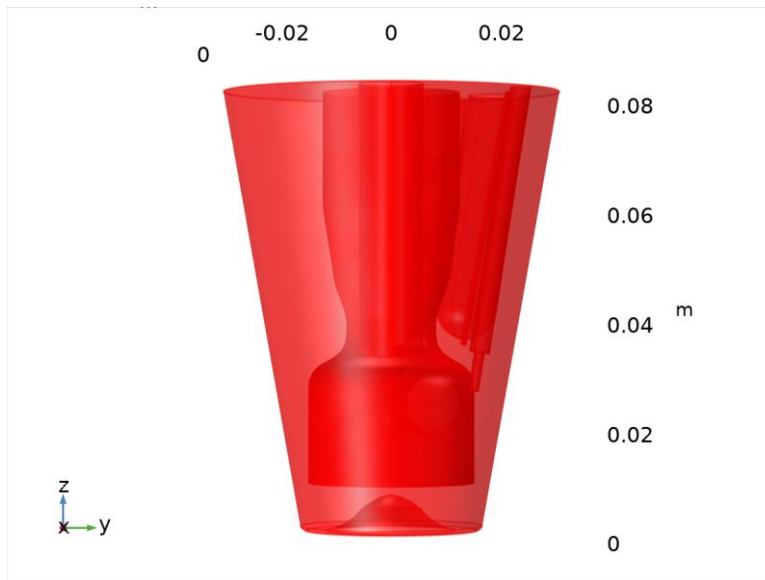

Dataset: Study 1/Solution 1

#### 4.1.2 Exterior Walls

##### DATA

| Description | Value                              |
|-------------|------------------------------------|
| Dataset     | <a href="#">Study 1/Solution 1</a> |

##### PARAMETERIZATION

| Description   | Value              |
|---------------|--------------------|
| x- and y-axes | Surface parameters |

#### 4.1.3 Cut Plane 1

##### DATA

| Description | Value                              |
|-------------|------------------------------------|
| Dataset     | <a href="#">Study 1/Solution 1</a> |



#### PLANE DATA

| Description  | Value |
|--------------|-------|
| Plane type   | Quick |
| x-coordinate | 0     |

#### ADVANCED

| Description      | Value                    |
|------------------|--------------------------|
| Space variables  | {cpl1x, cpl1y}           |
| Normal variables | {cpl1nx, cpl1ny, cpl1nz} |

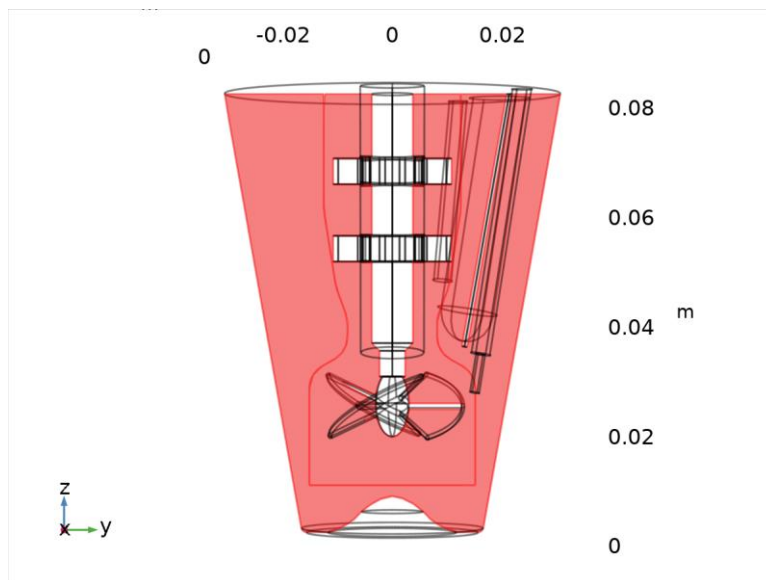

Dataset: Cut Plane 1

## 4.2 DERIVED VALUES

### 4.2.1 Volume Average 1

#### OUTPUT

Evaluated in [Table 1](#)

#### DATA

| Description | Value                              |
|-------------|------------------------------------|
| Dataset     | <a href="#">Study 1/Solution 1</a> |

#### EXPRESSIONS

| Expression | Unit | Description        |
|------------|------|--------------------|
| spf.U      | m/s  | Velocity magnitude |
| spf.sr     | 1/s  | Shear rate         |

| Expression | Unit             | Description         |
|------------|------------------|---------------------|
| spf.Qvd    | W/m <sup>3</sup> | Viscous dissipation |

#### INTEGRATION SETTINGS

| Description       | Value |
|-------------------|-------|
| Integration order | 4     |

### 4.2.2 Volume Maximum 1

#### OUTPUT

|              |                         |
|--------------|-------------------------|
| Evaluated in | <a href="#">Table 2</a> |
|--------------|-------------------------|

#### DATA

| Description | Value                              |
|-------------|------------------------------------|
| Dataset     | <a href="#">Study 1/Solution 1</a> |

#### EXPRESSIONS

| Expression | Unit             | Description         |
|------------|------------------|---------------------|
| spf.U      | m/s              | Velocity magnitude  |
| spf.sr     | 1/s              | Shear rate          |
| spf.Qvd    | W/m <sup>3</sup> | Viscous dissipation |

## 4.3 TABLES

### 4.3.1 Table 1

Volume Average 1

| f (rpm) | Velocity magnitude (m/s) | Shear rate (1/s) | Viscous dissipation (W/m <sup>3</sup> ) |
|---------|--------------------------|------------------|-----------------------------------------|
| 50.000  | 0.011904                 | 3.8207           | 0.24250                                 |
| 100.00  | 0.024732                 | 8.3109           | 1.2524                                  |
| 150.00  | 0.038566                 | 13.235           | 3.6306                                  |
| 200.00  | 0.052802                 | 18.364           | 7.8820                                  |
| 250.00  | 0.067124                 | 23.503           | 14.465                                  |
| 300.00  | 0.081469                 | 28.615           | 23.856                                  |
| 350.00  | 0.095826                 | 33.719           | 36.466                                  |
| 400.00  | 0.11024                  | 38.822           | 52.675                                  |
| 450.00  | 0.12468                  | 43.929           | 72.896                                  |
| 500.00  | 0.13911                  | 49.054           | 97.576                                  |
| 550.00  | 0.14590                  | 50.800           | 137.94                                  |
| 600.00  | 0.15928                  | 55.525           | 176.93                                  |

#### 4.3.2 Table 2

Volume Maximum 1

| f (rpm) | Velocity magnitude (m/s) | Shear rate (1/s) | Viscous dissipation (W/m <sup>3</sup> ) |
|---------|--------------------------|------------------|-----------------------------------------|
| 50.000  | 0.58831                  | 3466.2           | 36894                                   |
| 100.00  | 0.52373                  | 3756.1           | 38875                                   |
| 150.00  | 0.49238                  | 3974.3           | 45738                                   |
| 200.00  | 0.49172                  | 5053.2           | 71293                                   |
| 250.00  | 0.52419                  | 6245.8           | 1.2510E5                                |
| 300.00  | 0.56941                  | 7306.2           | 1.9374E5                                |
| 350.00  | 0.61504                  | 8221.5           | 2.6657E5                                |
| 400.00  | 0.66203                  | 9383.2           | 3.5995E5                                |
| 450.00  | 0.71690                  | 10536            | 4.7886E5                                |
| 500.00  | 0.79614                  | 11747            | 6.2198E5                                |
| 550.00  | 0.87201                  | 13024            | 7.9865E5                                |
| 600.00  | 0.95249                  | 14363            | 1.0147E6                                |

#### 4.4 PLOT GROUPS

##### 4.4.1 3D Plot Group 1

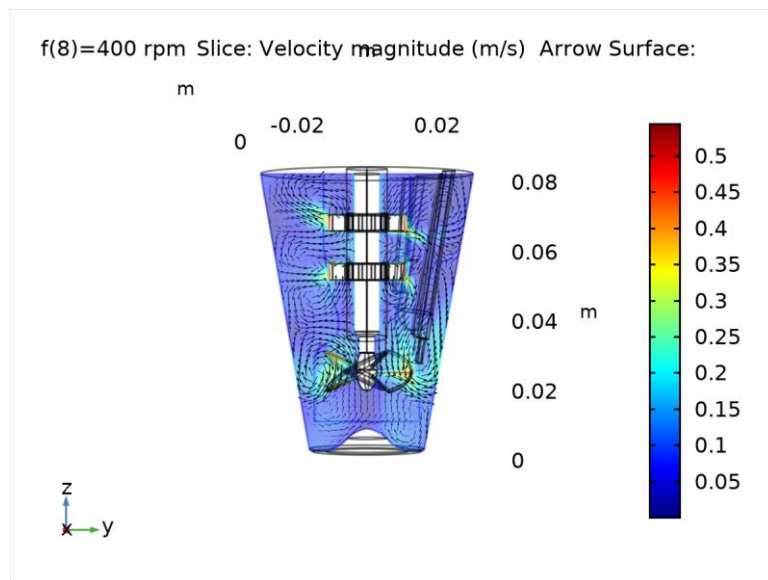

*Slice: Velocity magnitude (m/s) Arrow Surface:*

#### 4.4.2 3D Plot Group 2

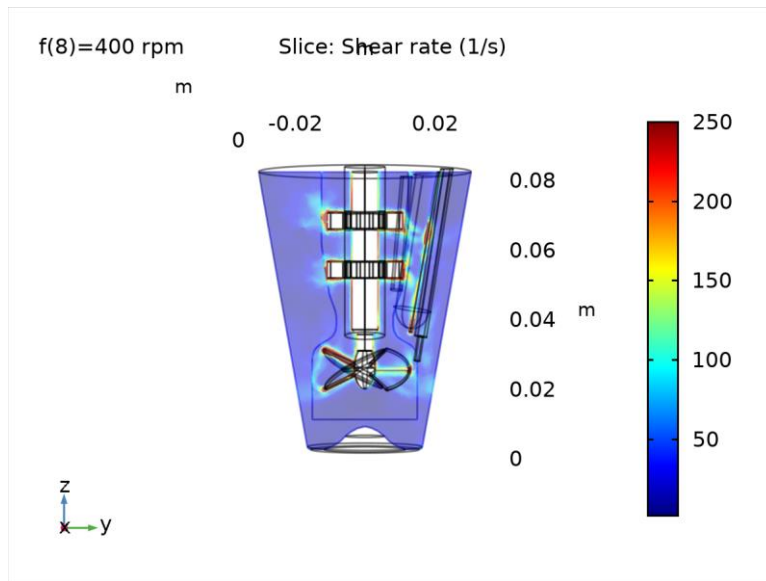

*Slice: Shear rate (1/s)*

#### 4.4.3 3D Plot Group 3

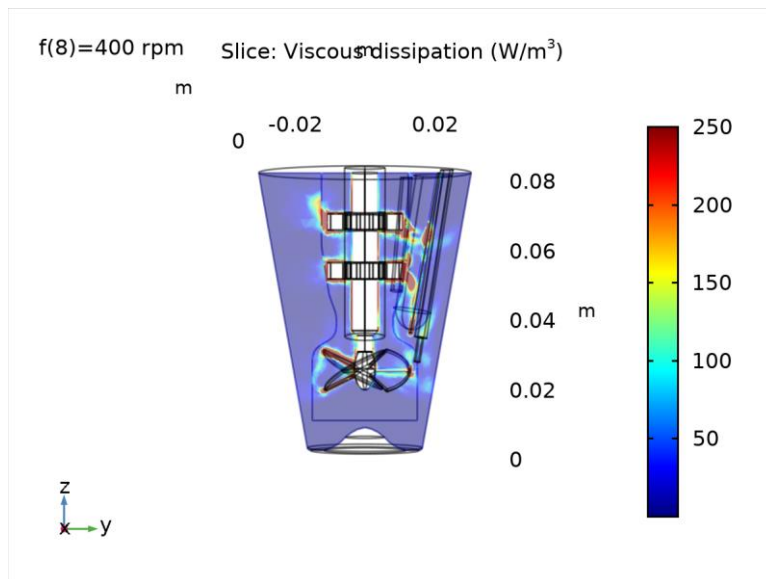

*Slice: Viscous dissipation (W/m<sup>3</sup>)*
