# Supplementary material
Source: MDPI journal article supplement (https://www.mdpi.com/2227-9717/10/1/107)
Supplement: s1 [file s1]

# Cmsolout r s30a

|             |                        |
|-------------|------------------------|
| Report date | Dec 4, 2021 7:38:50 PM |
|-------------|------------------------|

# Contents

|                                             |            |
|---------------------------------------------|------------|
| <b>1. Global Definitions .....</b>          | <b>3</b>   |
| 1.1. Parameters .....                       | 3          |
| 1.2. Geometry Parts .....                   | 5          |
| <b>2. Component 1 .....</b>                 | <b>28</b>  |
| 2.1. Definitions .....                      | 28         |
| 2.2. Geometry 1 .....                       | 31         |
| 2.3. Materials .....                        | 34         |
| 2.4. Turbulent Flow, k- $\epsilon$ .....    | 39         |
| 2.5. Mesh 1 .....                           | 104        |
| <b>3. Study 1 .....</b>                     | <b>112</b> |
| 3.1. Parametric Sweep Geschwindigkeit ..... | 112        |
| 3.2. Parametric Mesh .....                  | 112        |
| 3.3. Frozen Rotor .....                     | 112        |
| 3.4. Solver Configurations .....            | 113        |
| <b>4. Results .....</b>                     | <b>133</b> |
| 4.1. Datasets .....                         | 133        |
| 4.2. Derived Values .....                   | 137        |
| 4.3. Plot Groups .....                      | 138        |

# 1 Global Definitions

|      |                          |
|------|--------------------------|
| Date | Feb 15, 2021 11:43:55 AM |
|------|--------------------------|

## GLOBAL SETTINGS

|             |                                                       |
|-------------|-------------------------------------------------------|
| Name        | Comsolout r s30a.mph                                  |
| Path        | E:\CFD Jens Budde\Cluster\3Blatt\comsolout_r_s30a.mph |
| Version     | COMSOL Multiphysics 5.5 (Build: 359)                  |
| Unit system | SI                                                    |

## USED PRODUCTS

|                     |
|---------------------|
| COMSOL Multiphysics |
| CAD Import Module   |
| CFD Module          |

## 1.1 PARAMETERS

### PARAMETERS 1

| Name     | Expression | Value   | Description                        |
|----------|------------|---------|------------------------------------|
| D_u      | 3.5[cm]    | 0.035 m | unterer Kesseldurchmesser          |
| H        | 8.5[cm]    | 0.085 m | Füllhöhe                           |
| r_R      | 1.4[cm]    | 0.014 m | Rührblattradius                    |
| H_ausb   | 0.7[cm]    | 0.007 m | Kesselausbuchtungshöhe             |
| R_ab     | 1[mm]      | 0.001 m | Abrundungsradius Kessel            |
| z_pO2    | 3.5[cm]    | 0.035 m | Position (z) der pO2-Sonde         |
| x_pO2    | 1.5[cm]    | 0.015 m | Position (x) der pO2-Sonde         |
| d_pO2    | 1.2 [cm]   | 0.012 m | Durchmesser pO2-Sonde              |
| z_Beg    | 1.5[cm]    | 0.015 m | Position (z) des Begasungsrings    |
| d_Beg    | 0.4[cm]    | 0.004 m | Durchmesser Begasungsring          |
| d_Ring   | 2.8[cm]    | 0.028 m | Innendurchmesser Begasungsring     |
| w_S      | 10.06      | 10.06   | Sondenneigung                      |
| d_S1     | 0.1[cm]    | 0.001 m | Durchmesser der Steigrohre         |
| slot_pO2 | 0          | 0       | Belegungsplatz der pO2-Sonde       |
| slot_S1  | 5          | 5       | Belegungsplatz Steigrohr 1         |
| slot_T   | 7          | 7       | Belegungsplatz der Temperatursonde |
| slot_pH  | 8          | 8       | Belegungsplatz der pH-Sonde        |
| slot_S2  | 9          | 9       | Belegungsplatz Steigrohr 2         |
| slot_Beg | 10         | 10      | Belegungsplatz Begasungsring       |
| slot_S3  | 11         | 11      | Belegungsplatz Steigrohr 3         |

| Name  | Expression                  | Value      | Description                      |
|-------|-----------------------------|------------|----------------------------------|
| z_pH  | 3.7[cm]                     | 0.037 m    | Position (z) der pH-Sonde        |
| x_pH  | 1.6[cm]                     | 0.016 m    | Position (x) der pH-Sonde        |
| z_T   | 4.9[cm]                     | 0.049 m    | Position (z) der Temperatursonde |
| x_T   | 2.0 [cm]                    | 0.02 m     | Position (x) der Temperatursonde |
| z_S1  | 0.2[cm]                     | 0.002 m    | Position (z) Steigrohr 1         |
| x_S1  | 1.7[cm]                     | 0.017 m    | Position (x) Steigrohr 1         |
| z_S2  | 3.6[cm]                     | 0.036 m    | Position (z) Steigrohr 2         |
| x_S2  | 1.4[cm]                     | 0.014 m    | Position (x) Steigrohr 2         |
| z_S3  | 10.4[cm]                    | 0.104 m    | Position (z) Steigrohr 3         |
| x_S3  | 3.1[cm]                     | 0.031 m    | Position (x) Steigrohr 3         |
| d_pH  | 1.2[cm]                     | 0.012 m    | Durchmesser pH-Sonde             |
| d_T   | 0.4[cm]                     | 0.004 m    | Durchmesser Temperatursonde      |
| pos_R | 2.5[cm]                     | 0.025 m    | Rührerposition                   |
| d_Z   | 0.5[cm]                     | 0.005 m    | Schaftzylinderdurchmesser        |
| h_Z   | 0.5[cm]                     | 0.005 m    | Schaftzylinderhöhe               |
| h_K   | 0.15[cm]                    | 0.0015 m   | Schaftkegelhöhe                  |
| d_S   | 0.8[cm]                     | 0.008 m    | Schaftdurchmesser                |
| l_S   | $H - (h_K + h_Z/2 + pos_R)$ | 0.056 m    | Schaftlänge                      |
| f     | 100 [rpm]                   | 1.6667 1/s |                                  |
| TIME  | 0[s]                        | 0 s        |                                  |
| s_R   | 1[mm]                       | 0.001 m    | Rührblattstärke                  |
| w_R   | 30                          | 30         | Rührblattwinkel                  |
| h_E   | 0.65[cm]                    | 0.0065 m   | Ellipsoidhöhe (Halbachse)        |
| b_E   | 0.65[cm]                    | 0.0065 m   | Ellipsoidbreite                  |
| r_ab  | 1[mm]                       | 0.001 m    | Abrundungsradius                 |
| h_Z_1 | 0.55[cm]                    | 0.0055 m   | Schaftzylinderhöhe               |
| mf1   | 1E-4 [m]                    | 1E-4 m     |                                  |
| mf2   | 1E-5 [m]                    | 1E-5 m     |                                  |

## 1.2 GEOMETRY PARTS

### 1.2.1 Sonden

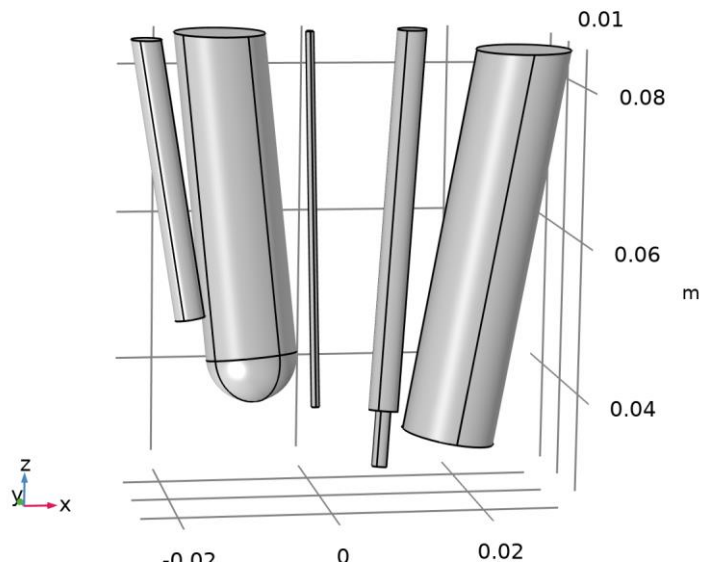

*Sonden*

#### UNITS

|              |     |
|--------------|-----|
| Length unit  | m   |
| Angular unit | deg |

#### GEOMETRY STATISTICS

| Description     | Value |
|-----------------|-------|
| Space dimension | 3     |

#### Zylinder 1 (cyl1)

##### POSITION

| Description | Value     |
|-------------|-----------|
| Position    | {0, 0, 0} |

##### AXIS

| Description | Value    |
|-------------|----------|
| Axis type   | z - axis |

##### SIZE AND SHAPE

| Description | Value   |
|-------------|---------|
| Radius      | d_pO2/2 |
| Height      | H       |

### Drehen 1 (rot1)

#### SETTINGS

| Description               | Value     |
|---------------------------|-----------|
| Point on axis of rotation | {0, 0, 0} |
| Axis type                 | y - axis  |
| Angle                     | 10.06     |

### Verschieben 1 (mov1)

#### SETTINGS

| Description | Value |
|-------------|-------|
| x           | 0.015 |
| y           | 0     |
| z           | 0.035 |

### Drehen 4 (rot2)

#### SETTINGS

| Description               | Value     |
|---------------------------|-----------|
| Point on axis of rotation | {0, 0, 0} |
| Axis type                 | z - axis  |
| Angle                     | 0         |

### Zylinder 2 (cyl2)

#### POSITION

| Description | Value     |
|-------------|-----------|
| Position    | {0, 0, H} |

#### AXIS

| Description | Value    |
|-------------|----------|
| Axis type   | z - axis |

#### SIZE AND SHAPE

| Description | Value |
|-------------|-------|
| Radius      | 1.3*H |
| Height      | 1.3*H |

### Zylinder 3 (cyl3)

#### POSITION

| Description | Value     |
|-------------|-----------|
| Position    | {0, 0, 0} |

#### AXIS

| Description | Value    |
|-------------|----------|
| Axis type   | z - axis |

#### SIZE AND SHAPE

| Description | Value  |
|-------------|--------|
| Radius      | d_S1/2 |
| Height      | H      |

### Drehen 2 (rot3)

#### SETTINGS

| Description               | Value     |
|---------------------------|-----------|
| Point on axis of rotation | {0, 0, 0} |
| Axis type                 | y - axis  |
| Angle                     | 10.06     |

### Verschieben 2 (mov2)

#### SETTINGS

| Description | Value |
|-------------|-------|
| x           | 0.017 |
| y           | 0     |
| z           | 0.002 |

### Drehen 3 (rot4)

#### SETTINGS

| Description               | Value     |
|---------------------------|-----------|
| Point on axis of rotation | {0, 0, 0} |
| Axis type                 | z - axis  |
| Angle                     | -150      |

### Zylinder 4 (cyl4)

#### POSITION

| Description | Value     |
|-------------|-----------|
| Position    | {0, 0, 0} |

#### AXIS

| Description | Value    |
|-------------|----------|
| Axis type   | z - axis |

#### SIZE AND SHAPE

| Description | Value   |
|-------------|---------|
| Radius      | $d_T/2$ |
| Height      | H       |

#### Drehen 5 (rot5)

##### SETTINGS

| Description               | Value     |
|---------------------------|-----------|
| Point on axis of rotation | {0, 0, 0} |
| Axis type                 | y - axis  |
| Angle                     | 10.06     |

#### Verschieben 3 (mov3)

##### SETTINGS

| Description | Value |
|-------------|-------|
| x           | 0.02  |
| y           | 0     |
| z           | 0.049 |

#### Drehen 6 (rot6)

##### SETTINGS

| Description               | Value     |
|---------------------------|-----------|
| Point on axis of rotation | {0, 0, 0} |
| Axis type                 | z - axis  |
| Angle                     | -210      |

#### Kugel 1 (sph1)

##### POSITION

| Description | Value               |
|-------------|---------------------|
| Position    | {0, 0, $d_{pH}/2$ } |

##### AXIS

| Description | Value    |
|-------------|----------|
| Axis type   | z - axis |

##### SIZE

| Description | Value      |
|-------------|------------|
| Radius      | $d_{pH}/2$ |



### Zylinder 5 (cyl5)

#### POSITION

| Description | Value          |
|-------------|----------------|
| Position    | {0, 0, d_pH/2} |

#### AXIS

| Description | Value    |
|-------------|----------|
| Axis type   | z - axis |

#### SIZE AND SHAPE

| Description | Value  |
|-------------|--------|
| Radius      | d_pH/2 |
| Height      | H      |

### Vereinigung 1 (uni1)

#### COMPOSE

| Description              | Value |
|--------------------------|-------|
| Keep interior boundaries | Off   |

### Drehen 7 (rot7)

#### SETTINGS

| Description               | Value     |
|---------------------------|-----------|
| Point on axis of rotation | {0, 0, 0} |
| Axis type                 | y - axis  |
| Angle                     | 10.06     |

### Verschieben 4 (mov4)

#### SETTINGS

| Description | Value                |
|-------------|----------------------|
| x           | 0.016                |
| y           | 0                    |
| z           | 0.037000000000000005 |

### Drehen 8 (rot8)

#### SETTINGS

| Description               | Value     |
|---------------------------|-----------|
| Point on axis of rotation | {0, 0, 0} |
| Axis type                 | z - axis  |
| Angle                     | -240      |

### Zylinder 6 (cyl6)

#### POSITION

| Description | Value     |
|-------------|-----------|
| Position    | {0, 0, 0} |

#### AXIS

| Description | Value    |
|-------------|----------|
| Axis type   | z - axis |

#### SIZE AND SHAPE

| Description | Value  |
|-------------|--------|
| Radius      | d_S1/2 |
| Height      | H      |

### Drehen 9 (rot9)

#### SETTINGS

| Description               | Value     |
|---------------------------|-----------|
| Point on axis of rotation | {0, 0, 0} |
| Axis type                 | y - axis  |
| Angle                     | 10.06     |

### Verschieben 5 (mov5)

#### SETTINGS

| Description | Value                |
|-------------|----------------------|
| x           | 0.013999999999999999 |
| y           | 0                    |
| z           | 0.036000000000000004 |

### Drehen 10 (rot10)

#### SETTINGS

| Description               | Value     |
|---------------------------|-----------|
| Point on axis of rotation | {0, 0, 0} |
| Axis type                 | z - axis  |
| Angle                     | -270      |

### Zylinder 7 (cyl7)

#### POSITION

| Description | Value     |
|-------------|-----------|
| Position    | {0, 0, 0} |

#### AXIS

| Description | Value    |
|-------------|----------|
| Axis type   | z - axis |

#### SIZE AND SHAPE

| Description | Value  |
|-------------|--------|
| Radius      | d_S1/2 |
| Height      | H      |

### Drehen 11 (rot11)

#### SETTINGS

| Description               | Value     |
|---------------------------|-----------|
| Point on axis of rotation | {0, 0, 0} |
| Axis type                 | y - axis  |
| Angle                     | 10.06     |

### Verschieben 6 (mov6)

#### SETTINGS

| Description | Value                |
|-------------|----------------------|
| x           | 0.031000000000000003 |
| y           | 0                    |
| z           | 0.104000000000000001 |

### Drehen 12 (rot12)

#### SETTINGS

| Description               | Value     |
|---------------------------|-----------|
| Point on axis of rotation | {0, 0, 0} |
| Axis type                 | z - axis  |
| Angle                     | -330      |

### Arbeitsebene 1 (wp1)

#### PLANE DEFINITION

| Description | Value      |
|-------------|------------|
| Plane       | xz - plane |

#### UNITE OBJECTS

| Description   | Value |
|---------------|-------|
| Unite objects | On    |

## Ebene Geometrie (sequence2D)

### Kreis 1 (c1)

#### POSITION

| Description | Value                       |
|-------------|-----------------------------|
| Position    | {d_Ring/2 + d_Beg/2, z_Beg} |

#### SIZE AND SHAPE

| Description | Value   |
|-------------|---------|
| Radius      | d_Beg/2 |

### Rotiert extrudieren 1 (rev1)

#### SETTINGS

| Description | Value                          |
|-------------|--------------------------------|
| Work plane  | <a href="#">Arbeitsebene 1</a> |

#### REVOLUTION ANGLES

| Description | Value     |
|-------------|-----------|
| Angles      | {0, 2*pi} |
| Start angle | 20        |

#### REVOLUTION AXIS

| Description                  | Value            |
|------------------------------|------------------|
| Point on the revolution axis | {0, 0}           |
| Direction of revolution axis | {0, 1}           |
| Revolution axis              | {{0, 0}, {0, 1}} |

### Begasungsrohr (cyl8)

#### POSITION

| Description | Value         |
|-------------|---------------|
| Position    | {0, 0, 2[cm]} |

#### AXIS

| Description | Value    |
|-------------|----------|
| Axis type   | z - axis |

#### SIZE AND SHAPE

| Description | Value     |
|-------------|-----------|
| Radius      | d_Beg/2   |
| Height      | H - 2[cm] |

### Cylinder 9 (cyl9)

#### POSITION

| Description | Value            |
|-------------|------------------|
| Position    | {0, 0, 1.25[cm]} |

#### AXIS

| Description | Value    |
|-------------|----------|
| Axis type   | z - axis |

#### SIZE AND SHAPE

| Description | Value    |
|-------------|----------|
| Radius      | d_Beg/4  |
| Height      | 0.75[cm] |

### Vereinigung 2 (uni2)

#### COMPOSE

| Description              | Value |
|--------------------------|-------|
| Keep interior boundaries | Off   |

### Drehen 13 (rot13)

#### SETTINGS

| Description               | Value     |
|---------------------------|-----------|
| Point on axis of rotation | {0, 0, 0} |
| Axis type                 | y - axis  |
| Angle                     | 10.06     |

### Verschieben 7 (mov7)

#### SETTINGS

| Description | Value |
|-------------|-------|
| x           | 0.016 |
| y           | 0     |
| z           | 0.015 |

### Kugel 2 (sph2)

#### POSITION

| Description | Value                          |
|-------------|--------------------------------|
| Position    | {d_Ring/2 + d_Beg/2, 0, z_Beg} |

#### AXIS

| Description | Value    |
|-------------|----------|
| Axis type   | z - axis |

#### SIZE

| Description | Value   |
|-------------|---------|
| Radius      | d_Beg/2 |

### Drehen 14 (rot14)

#### SETTINGS

| Description               | Value     |
|---------------------------|-----------|
| Point on axis of rotation | {0, 0, 0} |
| Axis type                 | z - axis  |
| Angle                     | -300      |

## 1.2.2 Reaktorkessel

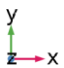

### Reaktorkessel

#### UNITS

|              |     |
|--------------|-----|
| Length unit  | m   |
| Angular unit | deg |

#### GEOMETRY STATISTICS

| Description     | Value |
|-----------------|-------|
| Space dimension | 3     |

## Arbeitsebene 1 (wp1)

### PLANE DEFINITION

| Description | Value      |
|-------------|------------|
| Plane       | xz - plane |

### UNITE OBJECTS

| Description   | Value |
|---------------|-------|
| Unite objects | On    |

## Ebene Geometrie (sequence2D)

### Bézier Polygon 1 (b1)

#### POLYGON SEGMENTS

| Description    | Value                                                             |
|----------------|-------------------------------------------------------------------|
| Control points | {{-D_u/2, 0, 0, -(3.5[cm] + 0.355*H)/2, -D_u/2}, {0, 0, H, H, 0}} |
| Degree         | {1, 1, 1, 1}                                                      |
| Weights        | {1, 1, 1, 1, 1, 1, 1, 1}                                          |
| Type           | Solid                                                             |

### Bézier Polygon 5 (b5)

#### POLYGON SEGMENTS

| Description    | Value                                                                                                                 |
|----------------|-----------------------------------------------------------------------------------------------------------------------|
| Control points | {{-0.0125, -0.008, -0.006, -0.003, 0, 0, 0, 0, -0.0125, -0.0125}, {0, 0.001, 0.004, 0.007, 0.007, 0.007, 0, 0, 0, 0}} |
| Degree         | {2, 2, 2, 2, 1}                                                                                                       |
| Weights        | {1, 0.7071067811865475, 1, 1, 0.7071067811865475, 1, 1, 0.7071067811865475, 1, 1, 0.7071067811865475, 1, 1, 1}        |
| Type           | Solid                                                                                                                 |

### Abrundung 1 (fil1)

#### SETTINGS

| Description | Value |
|-------------|-------|
| Radius      | R_ab  |

## Rotiert extrudieren 1 (rev1)

#### SETTINGS

| Description | Value                          |
|-------------|--------------------------------|
| Work plane  | <a href="#">Arbeitsebene 1</a> |

#### REVOLUTION ANGLES

| Description | Value |
|-------------|-------|
|-------------|-------|

| Description           | Value           |
|-----------------------|-----------------|
| Angles                | {0, 2*pi}       |
| Type of specification | Full revolution |
| Keep original faces   | Off             |

#### REVOLUTION AXIS

| Description                  | Value            |
|------------------------------|------------------|
| Point on the revolution axis | {0, 0}           |
| Direction of revolution axis | {0, 1}           |
| Revolution axis              | {{0, 0}, {0, 1}} |

### Zylinder 1 (cyl1)

#### POSITION

| Description | Value          |
|-------------|----------------|
| Position    | {0, 0, H_ausb} |

#### AXIS

| Description | Value    |
|-------------|----------|
| Axis type   | z - axis |

#### SIZE AND SHAPE

| Description | Value      |
|-------------|------------|
| Radius      | 1.1*r_R    |
| Height      | H - H_ausb |

### Arbeitsebene 2 (wp2)

#### PLANE DEFINITION

| Description | Value      |
|-------------|------------|
| Plane       | xz - plane |

#### UNITE OBJECTS

| Description   | Value |
|---------------|-------|
| Unite objects | On    |

### Ebene Geometrie (sequence2D)

#### Polygon 1 (pol1)

#### OBJECT TYPE

| Description | Value |
|-------------|-------|
| Type        | Solid |



## COORDINATES

| Description | Value |
|-------------|-------|
| Data source | Table |

## COORDINATES

| xw (m)                                         | yw (m)                      |
|------------------------------------------------|-----------------------------|
| 0                                              | $1.3 \cdot H_{\text{ausb}}$ |
| $1.15 \cdot r_R$                               | $1.3 \cdot H_{\text{ausb}}$ |
| $1.15 \cdot r_R$                               | $0.88 \cdot z_{\text{pO2}}$ |
| $x_{\text{pO2}} - 1.05 \cdot d_{\text{pO2}}/2$ | $1 \cdot z_{\text{pO2}}$    |
| $x_{\text{pO2}} - 1.05 \cdot d_{\text{pO2}}/2$ | H                           |
| 0                                              | H                           |

### Abrundung 1 (fil1)

## SETTINGS

| Description | Value |
|-------------|-------|
| Radius      | 0.005 |

### Rotiert extrudieren 2 (rev2)

## SETTINGS

| Description | Value                          |
|-------------|--------------------------------|
| Work plane  | <a href="#">Arbeitsebene 2</a> |

## REVOLUTION ANGLES

| Description           | Value                |
|-----------------------|----------------------|
| Angles                | $\{0, 2 \cdot \pi\}$ |
| Type of specification | Full revolution      |
| Keep original faces   | Off                  |

## REVOLUTION AXIS

| Description                  | Value                    |
|------------------------------|--------------------------|
| Point on the revolution axis | $\{0, 0\}$               |
| Direction of revolution axis | $\{0, 1\}$               |
| Revolution axis              | $\{\{0, 0\}, \{0, 1\}\}$ |

### 1.2.3 Rührer

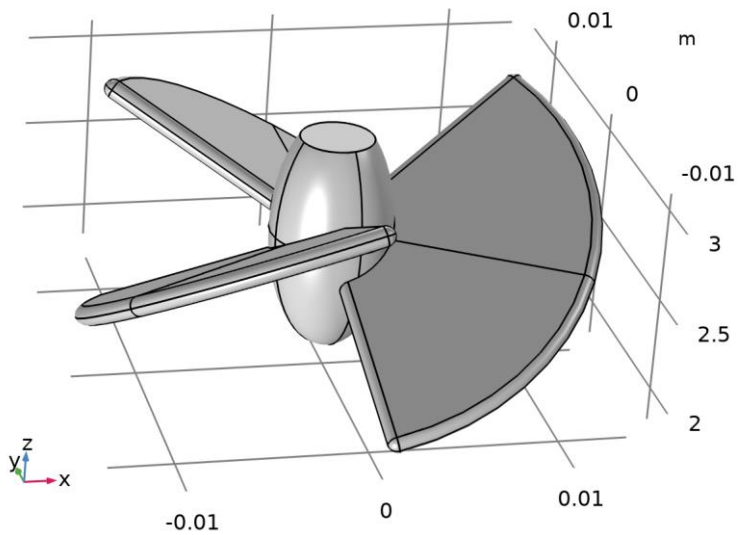

*Rührer*

#### UNITS

|              |     |
|--------------|-----|
| Length unit  | m   |
| Angular unit | deg |

#### GEOMETRY STATISTICS

| Description     | Value |
|-----------------|-------|
| Space dimension | 3     |

#### Arbeitsebene 1 (wp1)

##### UNITE OBJECTS

| Description   | Value |
|---------------|-------|
| Unite objects | On    |

#### Ebene Geometrie (sequence2D)

##### Kreis 1 (c1)

##### POSITION

| Description | Value  |
|-------------|--------|
| Position    | {0, 0} |

##### SIZE AND SHAPE

| Description | Value |
|-------------|-------|
| Radius      | r_R   |

#### Rechteck 1 (r1)

##### POSITION

| Description | Value  |
|-------------|--------|
| Position    | {0, 0} |

##### ROTATION ANGLE

| Description | Value |
|-------------|-------|
| Rotation    | 60    |

##### SIZE

| Description | Value |
|-------------|-------|
| Width       | r_R   |
| Height      | r_R   |

#### Rechteck 2 (r2)

##### POSITION

| Description | Value  |
|-------------|--------|
| Position    | {0, 0} |

##### ROTATION ANGLE

| Description | Value |
|-------------|-------|
| Rotation    | 30    |

##### SIZE

| Description | Value |
|-------------|-------|
| Width       | r_R   |
| Height      | r_R   |

#### Abrundung 1 (fil1)

##### SETTINGS

| Description | Value |
|-------------|-------|
| Radius      | r_ab  |

#### Arbeitsebene 2 (wp2)

##### UNITE OBJECTS

| Description   | Value |
|---------------|-------|
| Unite objects | On    |

## Ebene Geometrie (sequence2D)

### Rechteck 1 (r1)

#### POSITION

| Description | Value  |
|-------------|--------|
| Position    | {0, 0} |

#### SIZE

| Description | Value |
|-------------|-------|
| Width       | s_R/2 |
| Height      | r_R   |

### Abrundung 1 (fil1)

#### SETTINGS

| Description | Value |
|-------------|-------|
| Radius      | s_R/2 |

### Rotiert extrudieren 1 (rev1)

#### SETTINGS

| Description | Value                          |
|-------------|--------------------------------|
| Work plane  | <a href="#">Arbeitsebene 2</a> |

#### REVOLUTION ANGLES

| Description | Value     |
|-------------|-----------|
| Angles      | {0, 2*pi} |
| Start angle | -90       |
| End angle   | 90        |

#### REVOLUTION AXIS

| Description                  | Value            |
|------------------------------|------------------|
| Point on the revolution axis | {0, 0}           |
| Direction of revolution axis | {0, 1}           |
| Revolution axis              | {{0, 0}, {0, 1}} |

### Arbeitsebene 3 (wp3)

#### PLANE DEFINITION

| Description | Value      |
|-------------|------------|
| Plane       | zy - plane |

#### UNITE OBJECTS

| Description | Value |
|-------------|-------|
|-------------|-------|

| Description   | Value |
|---------------|-------|
| Unite objects | On    |

## Ebene Geometrie (sequence2D)

### Rechteck 1 (r1)

#### POSITION

| Description | Value              |
|-------------|--------------------|
| Position    | {pos_R - s_R/2, 0} |

#### SIZE

| Description | Value |
|-------------|-------|
| Width       | s_R   |
| Height      | r_R   |

### Abrundung 1 (fil1)

#### SETTINGS

| Description | Value |
|-------------|-------|
| Radius      | s_R/2 |

### Rotiert extrudieren 2 (rev2)

#### SETTINGS

| Description | Value                          |
|-------------|--------------------------------|
| Work plane  | <a href="#">Arbeitsebene 3</a> |

#### REVOLUTION ANGLES

| Description | Value     |
|-------------|-----------|
| Angles      | {0, 2*pi} |
| End angle   | 120       |

#### REVOLUTION AXIS

| Description                  | Value            |
|------------------------------|------------------|
| Axis type                    | 3D               |
| Point on the revolution axis | {0, 0, 0}        |
| Direction of revolution axis | {0, 0, 1}        |
| Revolution axis              | {{0, 0}, {0, 1}} |

### Kopieren 3 (copy3)

#### SETTINGS

| Description | Value |
|-------------|-------|
|-------------|-------|

| Description        | Value |
|--------------------|-------|
| Keep input objects | On    |
| x                  | 0     |
| y                  | 0     |
| z                  | 0     |

#### Drehen 4 (rot4)

##### SETTINGS

| Description               | Value         |
|---------------------------|---------------|
| Point on axis of rotation | {0, 0, pos_R} |
| Axis type                 | y - axis      |
| Angle                     | 180           |

#### Drehen 5 (rot5)

##### SETTINGS

| Description               | Value     |
|---------------------------|-----------|
| Point on axis of rotation | {0, 0, 0} |
| Axis type                 | z - axis  |
| Angle                     | 120       |

#### Vereinigung 2 (uni2)

##### COMPOSE

| Description              | Value |
|--------------------------|-------|
| Keep interior boundaries | Off   |

#### Verschieben 1 (mov1)

##### SETTINGS

| Description | Value   |
|-------------|---------|
| x           | 0       |
| y           | 0       |
| z           | -5.0E-4 |

#### Drehen 6 (rot6)

##### SETTINGS

| Description               | Value     |
|---------------------------|-----------|
| Point on axis of rotation | {0, 0, 0} |
| Axis type                 | z - axis  |
| Angle                     | -60       |

### Drehen 1 (rot1)

#### SETTINGS

| Description               | Value         |
|---------------------------|---------------|
| Point on axis of rotation | {0, 0, pos_R} |
| Axis type                 | y - axis      |
| Angle                     | 30            |

### Kopieren 1 (copy1)

#### SETTINGS

| Description        | Value |
|--------------------|-------|
| Keep input objects | On    |
| x                  | 0     |
| y                  | 0     |
| z                  | 0     |

### Drehen 2 (rot2)

#### SETTINGS

| Description               | Value         |
|---------------------------|---------------|
| Point on axis of rotation | {0, 0, pos_R} |
| Axis type                 | z - axis      |
| Angle                     | 120           |

### Kopieren 2 (copy2)

#### SETTINGS

| Description        | Value |
|--------------------|-------|
| Keep input objects | On    |
| x                  | 0     |
| y                  | 0     |
| z                  | 0     |

### Drehen 3 (rot3)

#### SETTINGS

| Description               | Value     |
|---------------------------|-----------|
| Point on axis of rotation | {0, 0, 0} |
| Axis type                 | z - axis  |
| Angle                     | 240       |

### Ellipsoid 1 (elp1)

#### POSITION

| Description | Value         |
|-------------|---------------|
| Position    | {0, 0, pos_R} |

#### ROTATION ANGLE

| Description | Value |
|-------------|-------|
| Rotation    | 14    |

#### AXIS

| Description | Value    |
|-------------|----------|
| Axis type   | z - axis |

#### SIZE

| Description | Value   |
|-------------|---------|
| a-semiaxis  | $b_E/2$ |
| b-semiaxis  | $b_E/2$ |
| c-semiaxis  | $h_E$   |

### Quader 1 (blk1)

#### POSITION

| Description | Value                                              |
|-------------|----------------------------------------------------|
| Position    | $\{-b_E/2, -b_E/2, \text{pos}_R + 4/5 \cdot h_E\}$ |

#### AXIS

| Description | Value    |
|-------------|----------|
| Axis type   | z - axis |

#### SIZE AND SHAPE

| Description | Value |
|-------------|-------|
| Width       | $b_E$ |
| Depth       | $b_E$ |
| Height      | $h_E$ |

### Vereinigung 1 (uni1)

#### SELECTIONS OF RESULTING ENTITIES

| Description                 | Value |
|-----------------------------|-------|
| Resulting objects selection | On    |

#### COMPOSE



| Description              | Value |
|--------------------------|-------|
| Keep interior boundaries | Off   |

## 1.2.4 Rührerschaft

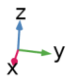

*Rührerschaft*

### UNITS

|              |     |
|--------------|-----|
| Length unit  | m   |
| Angular unit | deg |

### GEOMETRY STATISTICS

| Description     | Value |
|-----------------|-------|
| Space dimension | 3     |

## Zylinder 1 (cyl1)

### POSITION

| Description | Value                   |
|-------------|-------------------------|
| Position    | {0, 0, pos_R + 4/5*h_E} |

### AXIS

| Description | Value    |
|-------------|----------|
| Axis type   | z - axis |

### SIZE AND SHAPE

| Description | Value |
|-------------|-------|
| Radius      | d_Z/2 |

| Description | Value |
|-------------|-------|
| Height      | $h_Z$ |

### Exzentrischer Kegel 1 (econ1)

#### POSITION

| Description | Value                                          |
|-------------|------------------------------------------------|
| Position    | $\{0, 0, \text{pos}_R + 4/5 \cdot h_E + h_Z\}$ |

#### AXIS

| Description | Value    |
|-------------|----------|
| Axis type   | z - axis |

#### SIZE AND SHAPE

| Description      | Value      |
|------------------|------------|
| a-semiaxis       | $d_Z/2$    |
| b-semiaxis       | $d_Z/2$    |
| Height           | $h_K$      |
| Ratio            | $d_S/d_Z$  |
| Top displacement | $\{0, 0\}$ |

### Zylinder 2 (cyl2)

#### POSITION

| Description | Value                                                |
|-------------|------------------------------------------------------|
| Position    | $\{0, 0, \text{pos}_R + 4/5 \cdot h_E + h_Z + h_K\}$ |

#### AXIS

| Description | Value    |
|-------------|----------|
| Axis type   | z - axis |

#### SIZE AND SHAPE

| Description | Value                                            |
|-------------|--------------------------------------------------|
| Radius      | $d_S/2$                                          |
| Height      | $H - (\text{pos}_R + 4/5 \cdot h_E + h_Z + h_K)$ |

### Quader 1 (blk1)

#### POSITION

| Description | Value                                                                           |
|-------------|---------------------------------------------------------------------------------|
| Position    | $\{-0.005, 0.0035, \text{pos}_R + 4/5 \cdot h_E + h_Z + h_K + 0.5[\text{cm}]\}$ |

#### AXIS

| Description | Value    |
|-------------|----------|
| Axis type   | z - axis |

#### SIZE AND SHAPE

| Description | Value |
|-------------|-------|
| Width       | 0.01  |
| Depth       | 0.01  |
| Height      | 0.004 |

### Quader 2 (blk2)

#### POSITION

| Description | Value                                                  |
|-------------|--------------------------------------------------------|
| Position    | {-0.005, -0.0135, pos_R + 4/5*h_E+h_Z + h_K + 0.5[cm]} |

#### AXIS

| Description | Value    |
|-------------|----------|
| Axis type   | z - axis |

#### SIZE AND SHAPE

| Description | Value |
|-------------|-------|
| Width       | 0.01  |
| Depth       | 0.01  |
| Height      | 0.004 |

### Vereinigung 1 (uni1)

#### COMPOSE

| Description              | Value |
|--------------------------|-------|
| Keep interior boundaries | Off   |

## 2 Component 1

|      |                         |
|------|-------------------------|
| Date | Nov 16, 2020 9:12:43 AM |
|------|-------------------------|

### SETTINGS

| Description          | Value                 |
|----------------------|-----------------------|
| Unit system          | Same as global system |
| Geometry shape order | Automatic             |

### SPATIAL FRAME COORDINATES

| First | Second | Third |
|-------|--------|-------|
| x     | y      | z     |

### MATERIAL FRAME COORDINATES

| First | Second | Third |
|-------|--------|-------|
| X     | Y      | Z     |

### GEOMETRY FRAME COORDINATES

| First | Second | Third |
|-------|--------|-------|
| Xg    | Yg     | Zg    |

### MESH FRAME COORDINATES

| First | Second | Third |
|-------|--------|-------|
| Xm    | Ym     | Zm    |

## 2.1 DEFINITIONS

### 2.1.1 Pairs

#### Identity Boundary Pair 3a

|           |               |
|-----------|---------------|
| Pair type | Identity pair |
| Pair name | ap3           |

### SOURCE SELECTION

|                        |                                          |
|------------------------|------------------------------------------|
| Geometric entity level | Boundary                                 |
| Selection              | Geometry geom1: Dimension 2: Boundary 12 |

### DESTINATION SELECTION

|                        |                                          |
|------------------------|------------------------------------------|
| Geometric entity level | Boundary                                 |
| Selection              | Geometry geom1: Dimension 2: Boundary 41 |

### SETTINGS

| Name                    | Value |
|-------------------------|-------|
| Search method           | fast  |
| Extrapolation tolerance | 1e-4  |

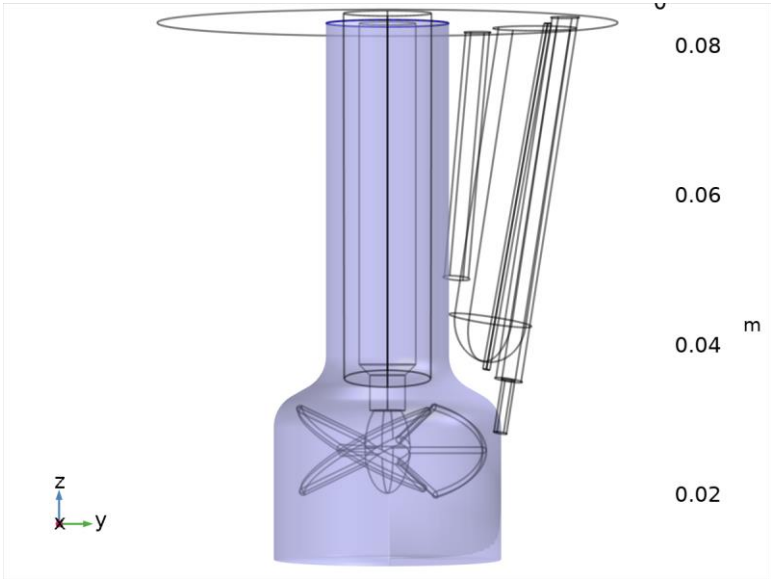

Source selection

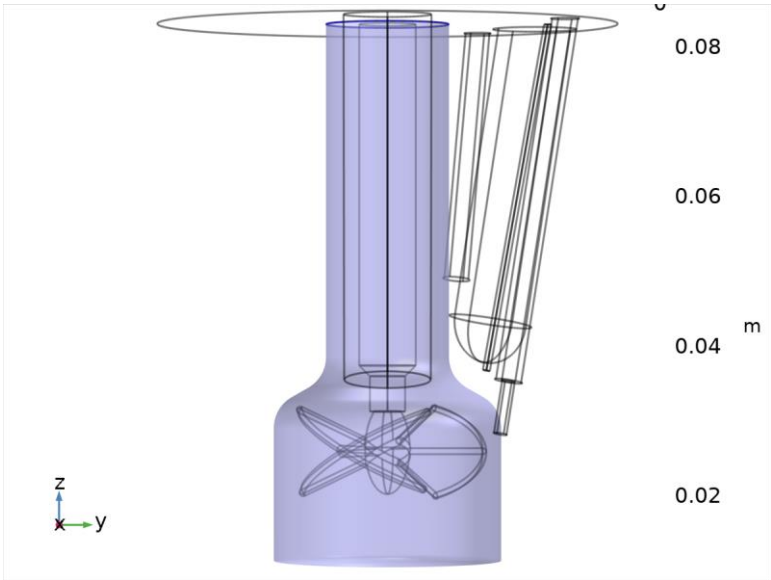

Destination selection

2.1.2 Coordinate Systems

Boundary System 1

|                        |                 |
|------------------------|-----------------|
| Coordinate system type | Boundary system |
| Tag                    | sys1            |

## COORDINATE NAMES

| First | Second | Third |
|-------|--------|-------|
| t1    | t2     | n     |

## 2.1.3 Moving Mesh

### Rotating Domain 1

|     |      |
|-----|------|
| Tag | rot1 |
|-----|------|

## SELECTION

|                        |                                       |
|------------------------|---------------------------------------|
| Geometric entity level | Domain                                |
| Selection              | Geometry geom1: Dimension 3: Domain 2 |

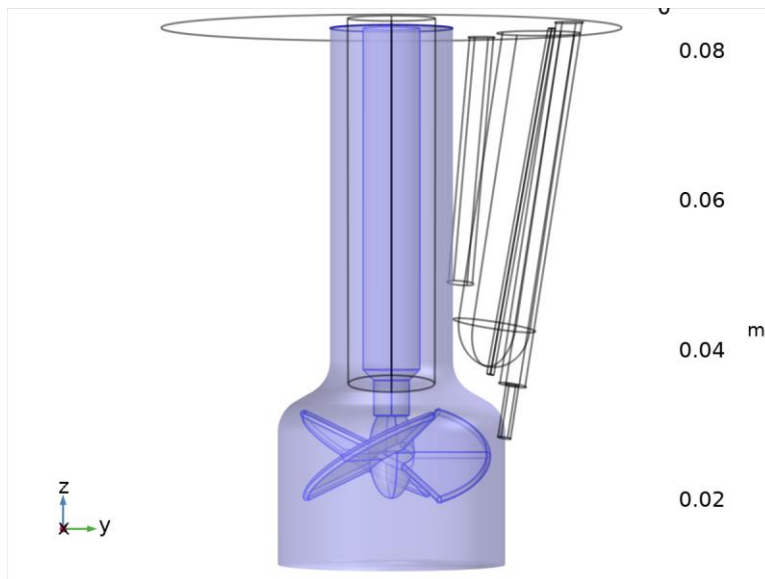

*Selection*

## ROTATION

| Description                    | Value                         |
|--------------------------------|-------------------------------|
| Rotation type                  | Specified rotational velocity |
| Rotational velocity expression | Constant revolutions per time |
| Revolutions per time           | f                             |

## AXIS

| Description              | Value     |
|--------------------------|-----------|
| Rotation axis base point | {0, 0, 0} |

## 2.2 GEOMETRY 1

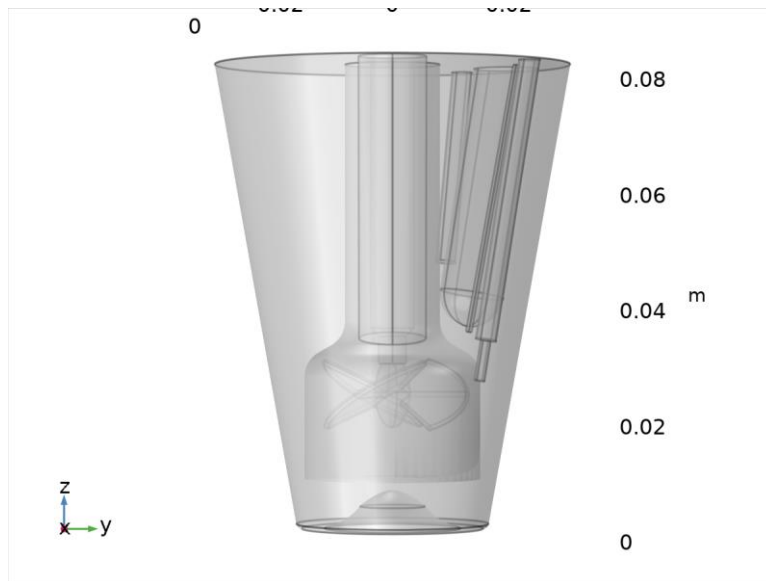

Geometry 1

### UNITS

|              |     |
|--------------|-----|
| Length unit  | m   |
| Angular unit | deg |

### GEOMETRY STATISTICS

| Description          | Value |
|----------------------|-------|
| Space dimension      | 3     |
| Number of domains    | 2     |
| Number of boundaries | 114   |
| Number of edges      | 252   |
| Number of vertices   | 155   |

### 2.2.1 Rührerschaft 1 (pi8)

#### PART

| Description | Value                        |
|-------------|------------------------------|
| Part        | <a href="#">Rührerschaft</a> |

#### POSITION AND ORIENTATION OF OUTPUT

| Description  | Value     |
|--------------|-----------|
| Displacement | {0, 0, 0} |
| Axis type    | zw - axis |

#### SELECTION SETTINGS

| Description                     | Value |
|---------------------------------|-------|
| Keep noncontributing selections | Off   |

### 2.2.2 Rührer 1 (pi7)

#### PART

| Description | Value                  |
|-------------|------------------------|
| Part        | <a href="#">Rührer</a> |

#### POSITION AND ORIENTATION OF OUTPUT

| Description  | Value     |
|--------------|-----------|
| Displacement | {0, 0, 0} |
| Axis type    | zw - axis |

#### DOMAIN SELECTIONS

| Name          | Keep | Physics | Contribute to |
|---------------|------|---------|---------------|
| Vereinigung 1 | Off  | On      | None          |

#### DOMAIN SELECTIONS

| Name          | Keep | Physics | Contribute to |
|---------------|------|---------|---------------|
| Vereinigung 1 | Off  | On      | None          |

#### DOMAIN SELECTIONS

| Name          | Keep | Physics | Contribute to |
|---------------|------|---------|---------------|
| Vereinigung 1 | Off  | On      | None          |

#### DOMAIN SELECTIONS

| Name          | Keep | Physics | Contribute to |
|---------------|------|---------|---------------|
| Vereinigung 1 | Off  | On      | None          |

#### SELECTION SETTINGS

| Description                     | Value |
|---------------------------------|-------|
| Keep noncontributing selections | Off   |

### 2.2.3 Reaktorkessel 1 (pi5)

#### PART

| Description | Value                         |
|-------------|-------------------------------|
| Part        | <a href="#">Reaktorkessel</a> |

#### POSITION AND ORIENTATION OF OUTPUT

| Description | Value |
|-------------|-------|
|-------------|-------|



| Description  | Value     |
|--------------|-----------|
| Displacement | {0, 0, 0} |
| Axis type    | zw - axis |

#### SELECTION SETTINGS

| Description                     | Value |
|---------------------------------|-------|
| Keep noncontributing selections | Off   |

### 2.2.4 Sonden 1 (pi6)

#### PART

| Description | Value                  |
|-------------|------------------------|
| Part        | <a href="#">Sonden</a> |

#### POSITION AND ORIENTATION OF OUTPUT

| Description  | Value     |
|--------------|-----------|
| Displacement | {0, 0, 0} |
| Axis type    | zw - axis |

#### SELECTION SETTINGS

| Description                     | Value |
|---------------------------------|-------|
| Keep noncontributing selections | Off   |

### 2.2.5 Difference 1 (dif1)

#### SETTINGS

| Description        | Value |
|--------------------|-------|
| Keep input objects | On    |

### 2.2.6 Form Assembly (fin)

#### SETTINGS

| Description | Value            |
|-------------|------------------|
| Action      | Form an assembly |

## 2.3 MATERIALS

### 2.3.1 Water

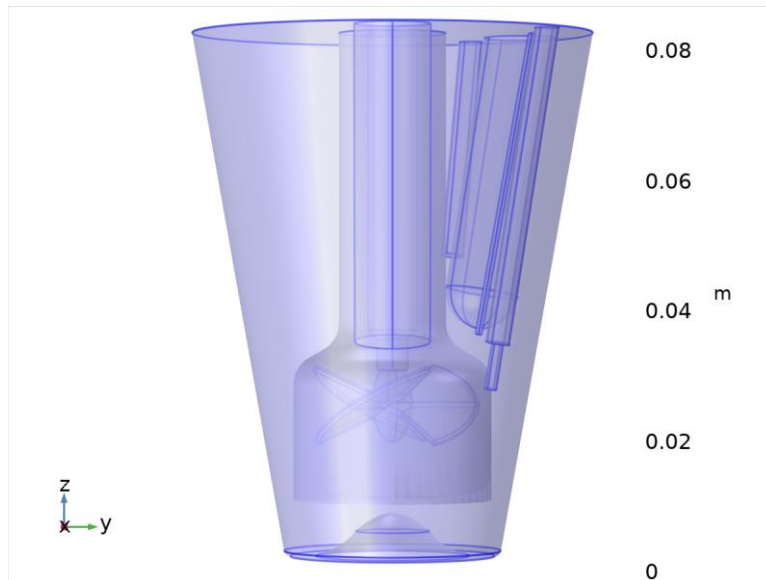

*Water*

#### SELECTION

|                        |                                          |
|------------------------|------------------------------------------|
| Geometric entity level | Domain                                   |
| Selection              | Geometry geom1: Dimension 3: All domains |

#### MATERIAL PARAMETERS

| Name              | Value     | Unit              |
|-------------------|-----------|-------------------|
| Dynamic viscosity | $\eta(T)$ | Pa·s              |
| Density           | $\rho(T)$ | kg/m <sup>3</sup> |

#### BASIC SETTINGS

| Description                          | Value                                                                     |
|--------------------------------------|---------------------------------------------------------------------------|
| Coefficient of thermal expansion     | $\{\{\alpha_p(T), 0, 0\}, \{0, \alpha_p(T), 0\}, \{0, 0, \alpha_p(T)\}\}$ |
| Bulk viscosity                       | $\mu_B(T)$                                                                |
| thermalexpansioncoefficient_symmetry | 3                                                                         |
| bulkviscosity_symmetry               | 0                                                                         |
| Dynamic viscosity                    | $\eta(T)$                                                                 |
| dynamicviscosity_symmetry            | 0                                                                         |
| Ratio of specific heats              | $\gamma_w(T)$                                                             |
| ratioofspecificheat_symmetry         | 0                                                                         |
| Electrical conductivity              | $\{\{5.5e-6[S/m], 0, 0\}, \{0, 5.5e-6[S/m], 0\}, \{0, 0, 5.5e-6[S/m]\}\}$ |

| Description                        | Value                                                |
|------------------------------------|------------------------------------------------------|
| electricconductivity_symmetry      | 3                                                    |
| Heat capacity at constant pressure | $C_p(T)$                                             |
| heatcapacity_symmetry              | 0                                                    |
| Density                            | $\rho(T)$                                            |
| density_symmetry                   | 0                                                    |
| Thermal conductivity               | $\{\{k(T), 0, 0\}, \{0, k(T), 0\}, \{0, 0, k(T)\}\}$ |
| thermalconductivity_symmetry       | 3                                                    |
| Speed of sound                     | $c_s(T)$                                             |
| soundspeed_symmetry                | 0                                                    |

### FUNCTIONS

| Function name | Type          |
|---------------|---------------|
| eta           | Piecewise     |
| $C_p$         | Piecewise     |
| $\rho$        | Piecewise     |
| $k$           | Piecewise     |
| $c_s$         | Interpolation |
| $\alpha_p$    | Analytic      |
| $\gamma_w$    | Analytic      |
| $\mu_B$       | Analytic      |

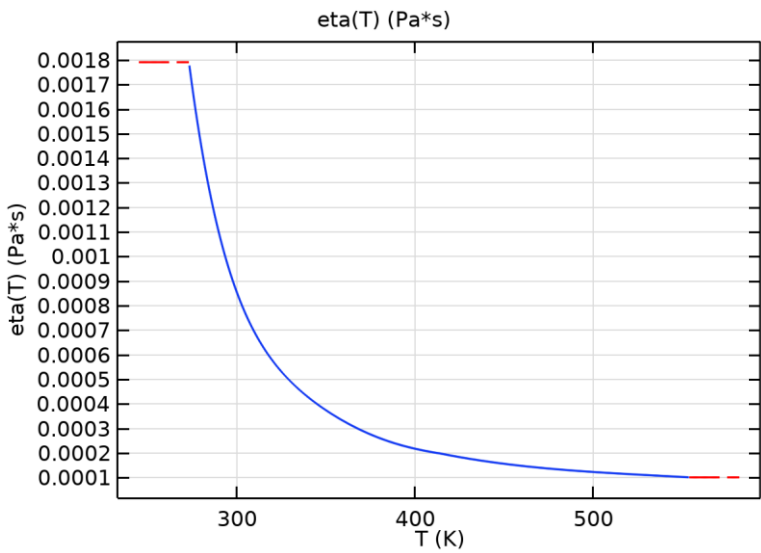

*eta*

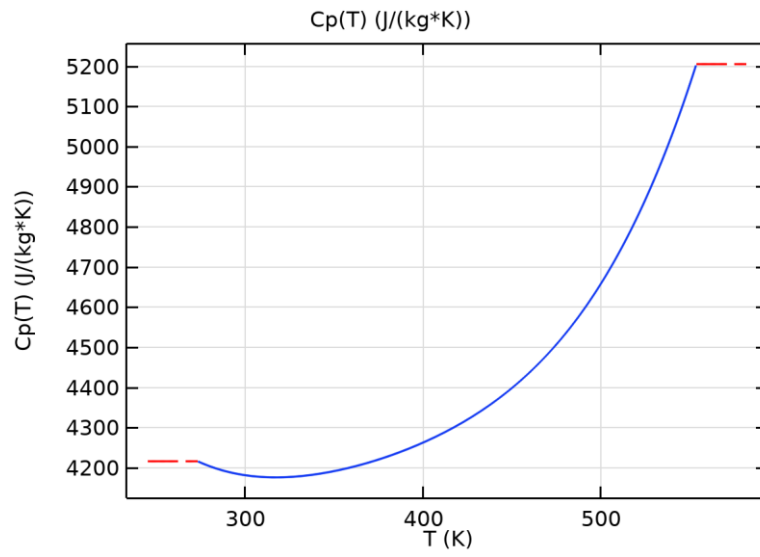

$C_p$

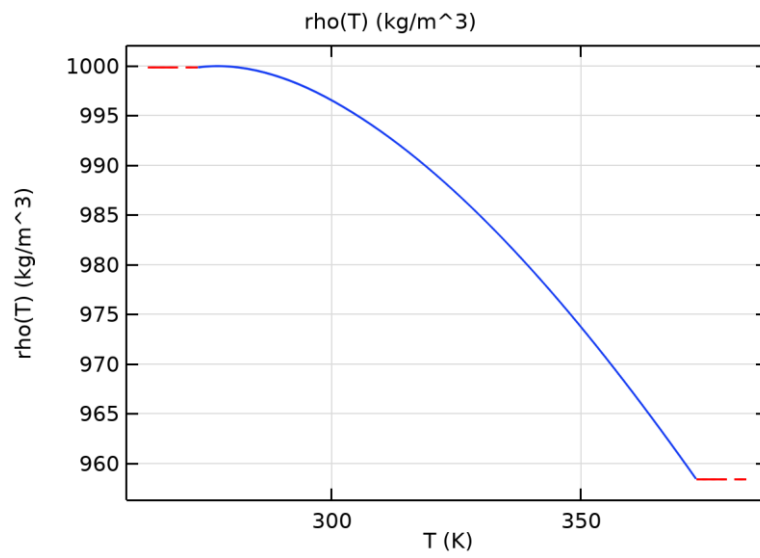

$\rho$

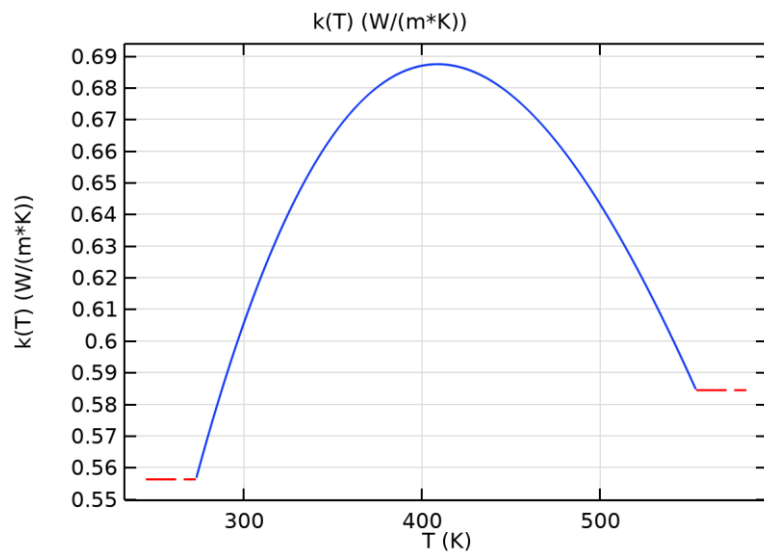

$k$

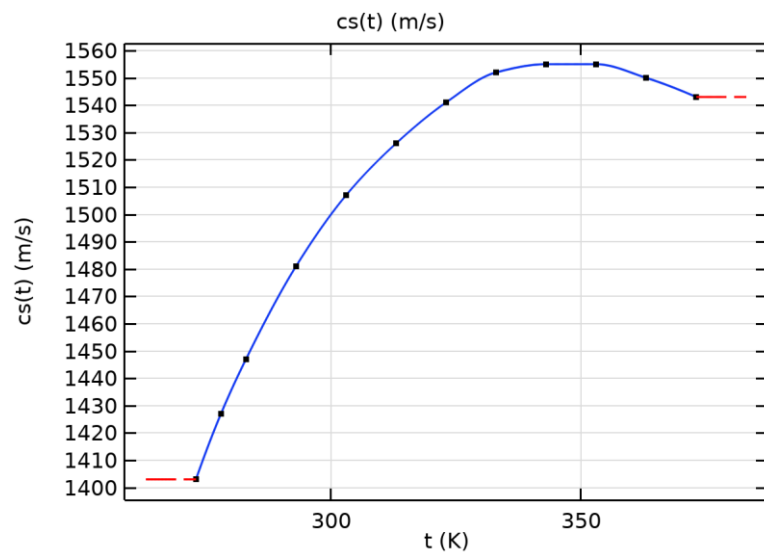

$cs$

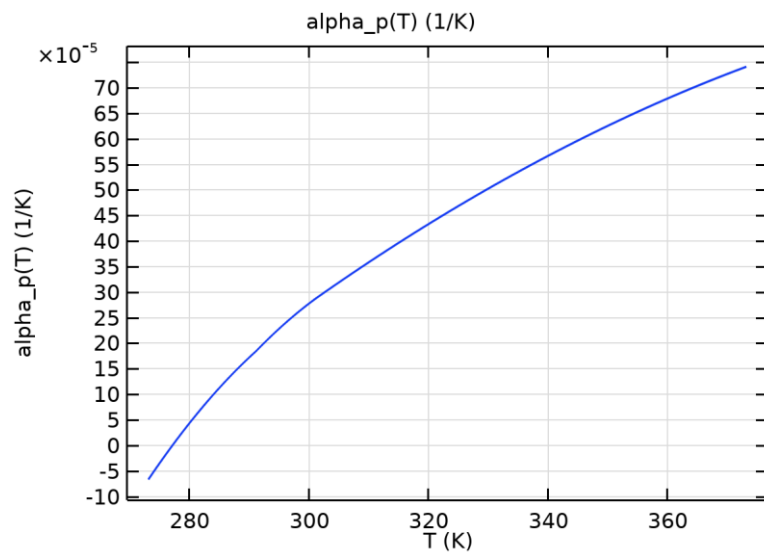

$\alpha_p$

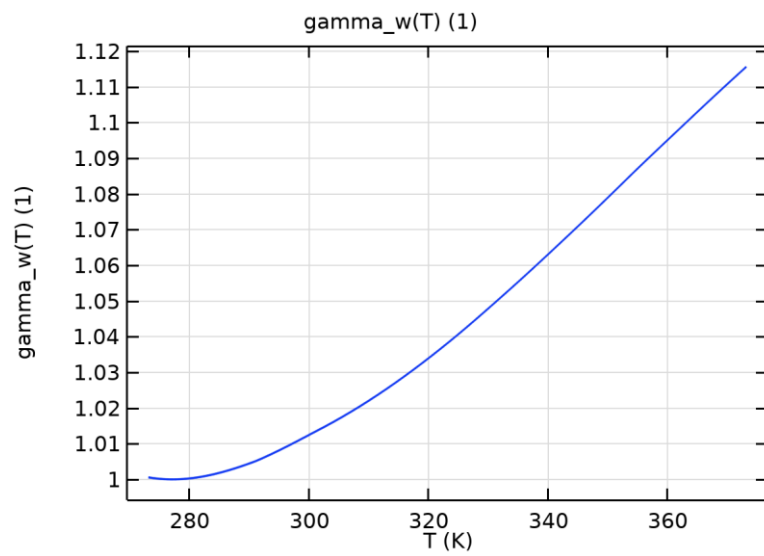

$\gamma_w$

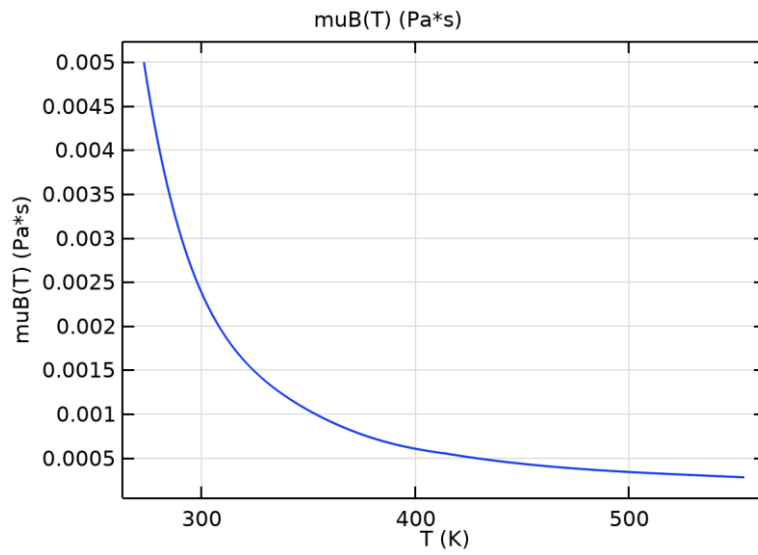

$\mu_B$

## 2.4 TURBULENT FLOW, K-E

### USED PRODUCTS

|                     |
|---------------------|
| COMSOL Multiphysics |
| CFD Module          |

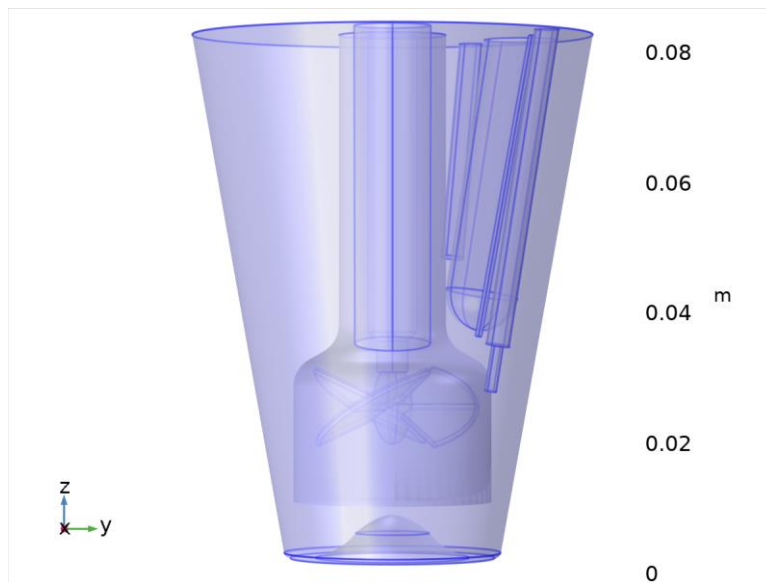

*Turbulent Flow,  $k-\epsilon$*

### SELECTION

|                        |                                          |
|------------------------|------------------------------------------|
| Geometric entity level | Domain                                   |
| Selection              | Geometry geom1: Dimension 3: All domains |

## EQUATIONS

$$\rho(\mathbf{u} \cdot \nabla)\mathbf{u} = \nabla \cdot [-p2\mathbf{I} + \mathbf{K}] + \mathbf{F} + \rho\mathbf{g}$$

$$\rho \nabla \cdot \mathbf{u} = 0$$

$$\mathbf{K} = (\mu + \mu_T)(\nabla\mathbf{u} + (\nabla\mathbf{u})^T)$$

$$\rho(\mathbf{u} \cdot \nabla)k_2 = \nabla \cdot \left[ \left( \mu + \frac{\mu_T}{\sigma_k} \right) \nabla k_2 \right] + P_k - \rho\epsilon$$

$$\rho(\mathbf{u} \cdot \nabla)\epsilon = \nabla \cdot \left[ \left( \mu + \frac{\mu_T}{\sigma_\epsilon} \right) \nabla \epsilon \right] + C_{\epsilon 1} \frac{\epsilon}{k_2} P_k - C_{\epsilon 2} \rho \frac{\epsilon^2}{k_2}, \quad \epsilon = \epsilon p_2$$

$$\mu_T = \rho C_\mu \frac{k_2^2}{\epsilon}$$

$$P_k = \mu_T \left[ \nabla \mathbf{u} : (\nabla \mathbf{u} + (\nabla \mathbf{u})^T) \right]$$

### 2.4.1 Interface settings

#### Discretization

##### SETTINGS

| Description              | Value   |
|--------------------------|---------|
| Discretization of fluids | P1 + P1 |

#### Physical model

##### SETTINGS

| Description                     | Value               |
|---------------------------------|---------------------|
| Compressibility                 | Incompressible flow |
| Include gravity                 | On                  |
| Use reduced pressure            | Off                 |
| Reference position, x component | 0                   |
| Reference position, y component | 0                   |
| Reference position, z component | 0                   |
| Reference temperature           | User defined        |
| Reference temperature           | 310.15[K]           |
| Reference pressure level        | 1[atm]              |

#### Turbulence

##### SETTINGS

| Description           | Value          |
|-----------------------|----------------|
| Turbulence model type | RANS           |
| Turbulence model      | k - ε          |
| Wall treatment        | Wall functions |



| Description                      | Value |
|----------------------------------|-------|
| Edit turbulence model parameters | Off   |

## 2.4.2 Variables

| Name       | Expression                                                                                                      | Unit | Description                     | Selection        | Details |
|------------|-----------------------------------------------------------------------------------------------------------------|------|---------------------------------|------------------|---------|
| spf.Tref   | model.input.Tref                                                                                                | K    | Reference temperature           | Global           | Meta    |
| spf.rrefx  | 0                                                                                                               | m    | Reference position, x component | Domains 1–2      |         |
| spf.rrefy  | 0                                                                                                               | m    | Reference position, y component | Domains 1–2      |         |
| spf.rrefz  | 0                                                                                                               | m    | Reference position, z component | Domains 1–2      |         |
| spf.dz     | 1                                                                                                               | m    | Thickness                       | Domains 1–2      |         |
| spf.pref   | 1[atm]                                                                                                          | Pa   | Reference pressure level        | Domains 1–2      |         |
| spf.pA     | p2+spf.pref                                                                                                     | Pa   | Absolute pressure               | Domains 1–2      |         |
| spf.hasWF  | 0                                                                                                               |      | Help variable                   | Boundaries 1–114 |         |
| spf.dt_CFL | $1/\max(\text{spf.maxOp}(\text{sqr}(\text{t(ematic_spatial(u-d(x,TIME),v-d(y,TIME),w-d(z,TIME)))))\text{,eps})$ | s    | Time step, CFL=1                | Global           |         |
| spf.sigmax | 0.2                                                                                                             | 1    | Smoothing parameter             | Domains 1–2      |         |
| spf.Ceps1  | 1.44                                                                                                            | 1    | Turbulence model parameter      | Domains 1–2      |         |
| spf.Ceps2  | 1.92                                                                                                            | 1    | Turbulence model parameter      | Domains 1–2      |         |
| spf.C_mu   | 0.09                                                                                                            | 1    | Turbulence model parameter      | Domains 1–2      |         |
| spf.sigmak | 1                                                                                                               | 1    | Turbulence model parameter      | Domains 1–2      |         |

| Name                       | Expression                                                                                                                                                                                                                                                     | Unit | Description                | Selection        | Details     |
|----------------------------|----------------------------------------------------------------------------------------------------------------------------------------------------------------------------------------------------------------------------------------------------------------|------|----------------------------|------------------|-------------|
| spf.sigmaeps               | 1.3                                                                                                                                                                                                                                                            | 1    | Turbulence model parameter | Domains 1–2      |             |
| spf.kappav                 | 0.41                                                                                                                                                                                                                                                           | 1    | Turbulence model parameter | Domains 1–2      |             |
| spf.B                      | 5.2                                                                                                                                                                                                                                                            | 1    | Law of the wall constant   | Domains 1–2      |             |
| spf.usePseudoTime Stepping | 1                                                                                                                                                                                                                                                              | 1    | Help variable              | Global           | + operation |
| spf.localCFLvalue          | $3 + \text{if}(\text{niterCMP} \geq 15, 1.3^{\min(-15 + \text{niterCMP}, 7)}, 0) + \text{if}(\text{niterCMP} \geq 40, 9 \cdot 1.3^{\min(-40 + \text{niterCMP}, 9)}, 0) + \text{if}(\text{niterCMP} \geq 70, 90 \cdot 1.3^{\min(-70 + \text{niterCMP}, 9)}, 0)$ |      | Local CFL number           | Domains 1–2      |             |
| spf.locCFL                 | CFLCMP                                                                                                                                                                                                                                                         | 1    | Local CFL number           | Domains 1–2      |             |
| spf.geometryLength Scale   | 0.01629375000000003                                                                                                                                                                                                                                            | m    | Geometry length scale      | Domains 1–2      |             |
| spf.time_step_inv          | $\max(\sqrt{\text{emetric\_spatial}(\text{u}-\text{d}(\text{x}, \text{TIME}), \text{v}-\text{d}(\text{y}, \text{TIME}), \text{w}-\text{d}(\text{z}, \text{TIME})) \cdot 2^{\text{gmg\_level}^2}}, \text{spf.nu}/\text{spf.geometryLengthScale}^2)$             | Hz   | Inverse time step          | Domains 1–2      |             |
| spf.tsti                   | $\text{nojac}(\text{spf.time\_step\_inv}/\text{spf.locCFL})$                                                                                                                                                                                                   | 1/s  | Help variable              | Domains 1–2      |             |
| spf.nx                     | dnx                                                                                                                                                                                                                                                            | 1    | Normal vector, x component | Boundaries 1–114 |             |
| spf.ny                     | dny                                                                                                                                                                                                                                                            | 1    | Normal vector, y component | Boundaries 1–114 |             |
| spf.nz                     | dnz                                                                                                                                                                                                                                                            | 1    | Normal vector, z component | Boundaries 1–114 |             |
| spf.nxmesh                 | dnxmesh                                                                                                                                                                                                                                                        | 1    | Normal vector, x component | Boundaries 1–114 |             |
| spf.nymesh                 | dnymesh                                                                                                                                                                                                                                                        | 1    | Normal vector, y component | Boundaries 1–114 |             |
| spf.nzmesh                 | dnzmesh                                                                                                                                                                                                                                                        | 1    | Normal vector, z component | Boundaries 1–114 |             |

## 2.4.3 Fluid Properties 1

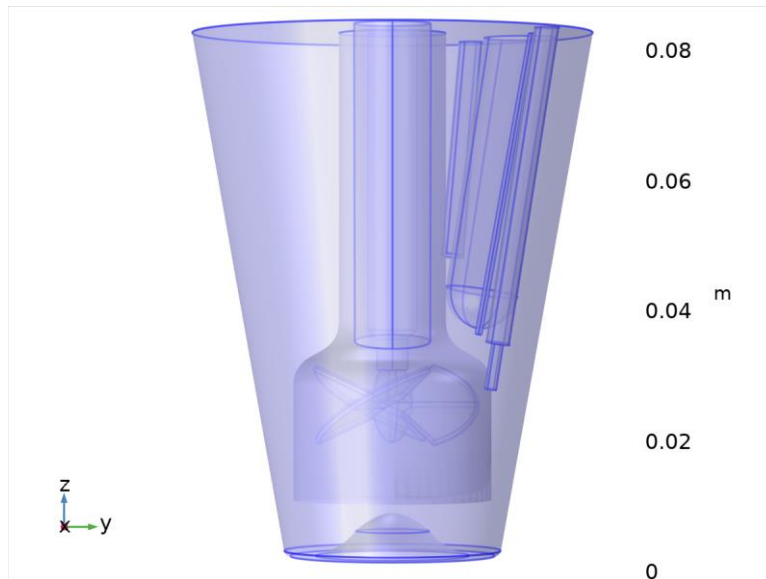

*Fluid Properties 1*

### SELECTION

|                        |                                          |
|------------------------|------------------------------------------|
| Geometric entity level | Domain                                   |
| Selection              | Geometry geom1: Dimension 3: All domains |

### EQUATIONS

$$\rho(\mathbf{u} \cdot \nabla)\mathbf{u} = \nabla \cdot [-p\mathbf{I} + \mathbf{K}] + \mathbf{F} + \rho\mathbf{g}$$

$$\rho \nabla \cdot \mathbf{u} = 0$$

$$\mathbf{K} = (\mu + \mu_T)(\nabla\mathbf{u} + (\nabla\mathbf{u})^T)$$

$$\rho(\mathbf{u} \cdot \nabla)k_2 = \nabla \cdot \left[ \left( \mu + \frac{\mu_T}{\sigma_k} \right) \nabla k_2 \right] + P_k - \rho\epsilon$$

$$\rho(\mathbf{u} \cdot \nabla)\epsilon = \nabla \cdot \left[ \left( \mu + \frac{\mu_T}{\sigma_\epsilon} \right) \nabla \epsilon \right] + C_{\epsilon 1} \frac{\epsilon}{k_2} P_k - C_{\epsilon 2} \rho \frac{\epsilon^2}{k_2}, \quad \epsilon = \text{ep2}$$

## Fluid properties

### SETTINGS

| Description       | Value         |
|-------------------|---------------|
| Density           | From material |
| Dynamic viscosity | From material |

## Mixing length limit

### SETTINGS

| Description         | Value     |
|---------------------|-----------|
| Mixing length limit | Automatic |

## Model input

### SETTINGS

| Description | Value              |
|-------------|--------------------|
| Temperature | Common model input |

### PROPERTIES FROM MATERIAL

| Property          | Material | Property group |
|-------------------|----------|----------------|
| Density           | Water    | Basic          |
| Dynamic viscosity | Water    | Basic          |

## Variables

| Name             | Expression                      | Unit | Description     | Selection   | Details |
|------------------|---------------------------------|------|-----------------|-------------|---------|
| spf.geometryLeng | $0.25 * \text{spf.l\_mix\_lim}$ | m    | Geometry length | Domains 1–2 |         |

| Name       | Expression                                                                                                                                                                                                                                                                             | Unit                           | Description                                        | Selection   | Details     |
|------------|----------------------------------------------------------------------------------------------------------------------------------------------------------------------------------------------------------------------------------------------------------------------------------------|--------------------------------|----------------------------------------------------|-------------|-------------|
| thScale    |                                                                                                                                                                                                                                                                                        |                                | scale                                              |             |             |
| spf.Fgtotx | 0                                                                                                                                                                                                                                                                                      | N/m <sup>3</sup>               | Gravity force, x component                         | Domains 1–2 | + operation |
| spf.Fgtoty | 0                                                                                                                                                                                                                                                                                      | N/m <sup>3</sup>               | Gravity force, y component                         | Domains 1–2 | + operation |
| spf.Fgtotz | 0                                                                                                                                                                                                                                                                                      | N/m <sup>3</sup>               | Gravity force, z component                         | Domains 1–2 | + operation |
| spf.k_nn   | max(k2,0)                                                                                                                                                                                                                                                                              | m <sup>2</sup> /s <sup>2</sup> | Regularized turbulent kinetic energy               | Domains 1–2 |             |
| spf.mu     | material.mu                                                                                                                                                                                                                                                                            | Pa-s                           | Dynamic viscosity                                  | Domains 1–2 | Meta        |
| spf.rho    | subst(material.rho,spf.fp1.mininput_temperature,spf.Trho,spf.fp1.mininput_pressure,spf.prho)                                                                                                                                                                                           | kg/m <sup>3</sup>              | Density                                            | Domains 1–2 | Meta        |
| uxt        | uxTIME-<br>uxx*d(x,TIME)-<br>uxy*d(y,TIME)-<br>uxz*d(z,TIME)                                                                                                                                                                                                                           | 1/s <sup>2</sup>               | Gradient of u, x component, first time derivative  | Domains 1–2 |             |
| uyt        | uyTIME-<br>uyx*d(x,TIME)-<br>uyy*d(y,TIME)-<br>uyz*d(z,TIME)                                                                                                                                                                                                                           | 1/s <sup>2</sup>               | Gradient of u, y component, first time derivative  | Domains 1–2 |             |
| uzt        | uzTIME-<br>uzx*d(x,TIME)-<br>uzy*d(y,TIME)-<br>uzz*d(z,TIME)                                                                                                                                                                                                                           | 1/s <sup>2</sup>               | Gradient of u, z component, first time derivative  | Domains 1–2 |             |
| uxtt       | d(uxTIME-<br>uxx*d(x,TIME)-<br>uxy*d(y,TIME)-<br>uxz*d(z,TIME),TIME)-<br>d(uxTIME-<br>uxx*d(x,TIME)-<br>uxy*d(y,TIME)-<br>uxz*d(z,TIME),x)*d(x,TIME)-<br>d(uxTIME-<br>uxx*d(x,TIME)-<br>uxy*d(y,TIME)-<br>uxz*d(z,TIME),y)*d(y,TIME)-<br>d(uxTIME-<br>uxx*d(x,TIME)-<br>uxy*d(y,TIME)- | 1/s <sup>3</sup>               | Gradient of u, x component, second time derivative | Domains 1–2 |             |

| Name | Expression                                                                                                                                                                                                                                                                                                                                                                                                                                                                            | Unit    | Description                                        | Selection   | Details |
|------|---------------------------------------------------------------------------------------------------------------------------------------------------------------------------------------------------------------------------------------------------------------------------------------------------------------------------------------------------------------------------------------------------------------------------------------------------------------------------------------|---------|----------------------------------------------------|-------------|---------|
|      | $uxz \cdot d(z, TIME), z) \cdot d(z, TIME)$                                                                                                                                                                                                                                                                                                                                                                                                                                           |         |                                                    |             |         |
| uytt | $d(uyTIME -$<br>$uyx \cdot d(x, TIME) -$<br>$uyy \cdot d(y, TIME) -$<br>$uyz \cdot d(z, TIME), TIME) -$<br>$d(uyTIME -$<br>$uyx \cdot d(x, TIME) -$<br>$uyy \cdot d(y, TIME) -$<br>$uyz \cdot d(z, TIME), x) \cdot d(x,$<br>$TIME) - d(uyTIME -$<br>$uyx \cdot d(x, TIME) -$<br>$uyy \cdot d(y, TIME) -$<br>$uyz \cdot d(z, TIME), y) \cdot d(y,$<br>$TIME) - d(uyTIME -$<br>$uyx \cdot d(x, TIME) -$<br>$uyy \cdot d(y, TIME) -$<br>$uyz \cdot d(z, TIME), z) \cdot d(z,$<br>$TIME)$ | $1/s^3$ | Gradient of u, y component, second time derivative | Domains 1–2 |         |
| uztt | $d(uzTIME -$<br>$uzx \cdot d(x, TIME) -$<br>$uzy \cdot d(y, TIME) -$<br>$uzz \cdot d(z, TIME), TIME) -$<br>$d(uzTIME -$<br>$uzx \cdot d(x, TIME) -$<br>$uzy \cdot d(y, TIME) -$<br>$uzz \cdot d(z, TIME), x) \cdot d(x,$<br>$TIME) - d(uzTIME -$<br>$uzx \cdot d(x, TIME) -$<br>$uzy \cdot d(y, TIME) -$<br>$uzz \cdot d(z, TIME), y) \cdot d(y,$<br>$TIME) - d(uzTIME -$<br>$uzx \cdot d(x, TIME) -$<br>$uzy \cdot d(y, TIME) -$<br>$uzz \cdot d(z, TIME), z) \cdot d(z,$<br>$TIME)$ | $1/s^3$ | Gradient of u, z component, second time derivative | Domains 1–2 |         |
| vxt  | $vxTIME -$<br>$vxx \cdot d(x, TIME) -$<br>$vxy \cdot d(y, TIME) -$<br>$vxz \cdot d(z, TIME)$                                                                                                                                                                                                                                                                                                                                                                                          | $1/s^2$ | Gradient of v, x component, first time derivative  | Domains 1–2 |         |
| vyt  | $vyTIME -$<br>$vyx \cdot d(x, TIME) -$<br>$vyy \cdot d(y, TIME) -$<br>$vyz \cdot d(z, TIME)$                                                                                                                                                                                                                                                                                                                                                                                          | $1/s^2$ | Gradient of v, y component, first time derivative  | Domains 1–2 |         |
| vzt  | $vzTIME -$<br>$vzx \cdot d(x, TIME) -$                                                                                                                                                                                                                                                                                                                                                                                                                                                | $1/s^2$ | Gradient of v, z component, first                  | Domains 1–2 |         |

| Name             | Expression                                                                                                                                                                                                                                                                                                                                                                                                                                                                                                                                                                                                   | Unit             | Description                                        | Selection   | Details |
|------------------|--------------------------------------------------------------------------------------------------------------------------------------------------------------------------------------------------------------------------------------------------------------------------------------------------------------------------------------------------------------------------------------------------------------------------------------------------------------------------------------------------------------------------------------------------------------------------------------------------------------|------------------|----------------------------------------------------|-------------|---------|
|                  | $v_{zy} \cdot d(y, \text{TIME}) - v_{zz} \cdot d(z, \text{TIME})$                                                                                                                                                                                                                                                                                                                                                                                                                                                                                                                                            |                  | time derivative                                    |             |         |
| vx <sub>tt</sub> | $d(v_x \text{TIME} - v_{xx} \cdot d(x, \text{TIME}) - v_{xy} \cdot d(y, \text{TIME}) - v_{xz} \cdot d(z, \text{TIME}), \text{TIME}) -$<br>$d(v_x \text{TIME} - v_{xx} \cdot d(x, \text{TIME}) - v_{xy} \cdot d(y, \text{TIME}) - v_{xz} \cdot d(z, \text{TIME}), x) \cdot d(x, \text{TIME}) -$<br>$d(v_x \text{TIME} - v_{xx} \cdot d(x, \text{TIME}) - v_{xy} \cdot d(y, \text{TIME}) - v_{xz} \cdot d(z, \text{TIME}), y) \cdot d(y, \text{TIME}) -$<br>$d(v_x \text{TIME} - v_{xx} \cdot d(x, \text{TIME}) - v_{xy} \cdot d(y, \text{TIME}) - v_{xz} \cdot d(z, \text{TIME}), z) \cdot d(z, \text{TIME})$ | 1/s <sup>3</sup> | Gradient of v, x component, second time derivative | Domains 1–2 |         |
| vy <sub>tt</sub> | $d(v_y \text{TIME} - v_{yx} \cdot d(x, \text{TIME}) - v_{yy} \cdot d(y, \text{TIME}) - v_{yz} \cdot d(z, \text{TIME}), \text{TIME}) -$<br>$d(v_y \text{TIME} - v_{yx} \cdot d(x, \text{TIME}) - v_{yy} \cdot d(y, \text{TIME}) - v_{yz} \cdot d(z, \text{TIME}), x) \cdot d(x, \text{TIME}) -$<br>$d(v_y \text{TIME} - v_{yx} \cdot d(x, \text{TIME}) - v_{yy} \cdot d(y, \text{TIME}) - v_{yz} \cdot d(z, \text{TIME}), y) \cdot d(y, \text{TIME}) -$<br>$d(v_y \text{TIME} - v_{yx} \cdot d(x, \text{TIME}) - v_{yy} \cdot d(y, \text{TIME}) - v_{yz} \cdot d(z, \text{TIME}), z) \cdot d(z, \text{TIME})$ | 1/s <sup>3</sup> | Gradient of v, y component, second time derivative | Domains 1–2 |         |
| vz <sub>tt</sub> | $d(v_z \text{TIME} - v_{zx} \cdot d(x, \text{TIME}) - v_{zy} \cdot d(y, \text{TIME}) - v_{zz} \cdot d(z, \text{TIME}), \text{TIME}) -$<br>$d(v_z \text{TIME} - v_{zx} \cdot d(x, \text{TIME}) - v_{zy} \cdot d(y, \text{TIME}) - v_{zz} \cdot d(z, \text{TIME}), x) \cdot d(x, \text{TIME}) -$<br>$d(v_z \text{TIME} - v_{zx} \cdot d(x, \text{TIME}) - v_{zy} \cdot d(y, \text{TIME}) - v_{zz} \cdot d(z, \text{TIME}), y) \cdot d(y, \text{TIME}) -$<br>$d(v_z \text{TIME} - v_{zx} \cdot d(x, \text{TIME}) - v_{zy} \cdot d(y, \text{TIME}) - v_{zz} \cdot d(z, \text{TIME}), z) \cdot d(z, \text{TIME})$ | 1/s <sup>3</sup> | Gradient of v, z component, second time derivative | Domains 1–2 |         |

| Name | Expression                                                                                                                                                                                                                                                                                                                                                                                                                                                                                                                                                                                                                                                                                                           | Unit    | Description                                        | Selection   | Details |
|------|----------------------------------------------------------------------------------------------------------------------------------------------------------------------------------------------------------------------------------------------------------------------------------------------------------------------------------------------------------------------------------------------------------------------------------------------------------------------------------------------------------------------------------------------------------------------------------------------------------------------------------------------------------------------------------------------------------------------|---------|----------------------------------------------------|-------------|---------|
|      | $v_{zz} \frac{d}{dt}(z, \text{TIME}, y) \frac{d}{dt}(y, \text{TIME}) - \frac{d}{dt}(v_z \text{TIME} - v_{zx} \frac{d}{dt}(x, \text{TIME}) - v_{zy} \frac{d}{dt}(y, \text{TIME}) - v_{zz} \frac{d}{dt}(z, \text{TIME}), z) \frac{d}{dt}(z, \text{TIME})$                                                                                                                                                                                                                                                                                                                                                                                                                                                              |         |                                                    |             |         |
| wxt  | $w_x \text{TIME} - w_{xx} \frac{d}{dt}(x, \text{TIME}) - w_{xy} \frac{d}{dt}(y, \text{TIME}) - w_{xz} \frac{d}{dt}(z, \text{TIME})$                                                                                                                                                                                                                                                                                                                                                                                                                                                                                                                                                                                  | $1/s^2$ | Gradient of w, x component, first time derivative  | Domains 1–2 |         |
| wyt  | $w_y \text{TIME} - w_{yx} \frac{d}{dt}(x, \text{TIME}) - w_{yy} \frac{d}{dt}(y, \text{TIME}) - w_{yz} \frac{d}{dt}(z, \text{TIME})$                                                                                                                                                                                                                                                                                                                                                                                                                                                                                                                                                                                  | $1/s^2$ | Gradient of w, y component, first time derivative  | Domains 1–2 |         |
| wzt  | $w_z \text{TIME} - w_{zx} \frac{d}{dt}(x, \text{TIME}) - w_{zy} \frac{d}{dt}(y, \text{TIME}) - w_{zz} \frac{d}{dt}(z, \text{TIME})$                                                                                                                                                                                                                                                                                                                                                                                                                                                                                                                                                                                  | $1/s^2$ | Gradient of w, z component, first time derivative  | Domains 1–2 |         |
| wxtt | $\frac{d}{dt}(w_x \text{TIME} - w_{xx} \frac{d}{dt}(x, \text{TIME}) - w_{xy} \frac{d}{dt}(y, \text{TIME}) - w_{xz} \frac{d}{dt}(z, \text{TIME}), \text{TIME}) - \frac{d}{dt}(w_x \text{TIME} - w_{xx} \frac{d}{dt}(x, \text{TIME}) - w_{xy} \frac{d}{dt}(y, \text{TIME}) - w_{xz} \frac{d}{dt}(z, \text{TIME}), x) \frac{d}{dt}(x, \text{TIME}) - \frac{d}{dt}(w_x \text{TIME} - w_{xx} \frac{d}{dt}(x, \text{TIME}) - w_{xy} \frac{d}{dt}(y, \text{TIME}) - w_{xz} \frac{d}{dt}(z, \text{TIME}), y) \frac{d}{dt}(y, \text{TIME}) - \frac{d}{dt}(w_x \text{TIME} - w_{xx} \frac{d}{dt}(x, \text{TIME}) - w_{xy} \frac{d}{dt}(y, \text{TIME}) - w_{xz} \frac{d}{dt}(z, \text{TIME}), z) \frac{d}{dt}(z, \text{TIME})$ | $1/s^3$ | Gradient of w, x component, second time derivative | Domains 1–2 |         |
| wytt | $\frac{d}{dt}(w_y \text{TIME} - w_{yx} \frac{d}{dt}(x, \text{TIME}) - w_{yy} \frac{d}{dt}(y, \text{TIME}) - w_{yz} \frac{d}{dt}(z, \text{TIME}), \text{TIME}) - \frac{d}{dt}(w_y \text{TIME} - w_{yx} \frac{d}{dt}(x, \text{TIME}) - w_{yy} \frac{d}{dt}(y, \text{TIME}) - w_{yz} \frac{d}{dt}(z, \text{TIME}), x) \frac{d}{dt}(x, \text{TIME}) - \frac{d}{dt}(w_y \text{TIME} - w_{yx} \frac{d}{dt}(x, \text{TIME}) - w_{yy} \frac{d}{dt}(y, \text{TIME}) - w_{yz} \frac{d}{dt}(z, \text{TIME}), y) \frac{d}{dt}(y, \text{TIME}) - \frac{d}{dt}(w_y \text{TIME} - w_{yx} \frac{d}{dt}(x, \text{TIME}) - w_{yy} \frac{d}{dt}(y, \text{TIME}) - w_{yz} \frac{d}{dt}(z, \text{TIME}), z) \frac{d}{dt}(z, \text{TIME})$ | $1/s^3$ | Gradient of w, y component, second time derivative | Domains 1–2 |         |



| Name | Expression                                                                                                                                                                                                                                                                                                                                                                                                                                                                                                                                            | Unit    | Description                                         | Selection   | Details |
|------|-------------------------------------------------------------------------------------------------------------------------------------------------------------------------------------------------------------------------------------------------------------------------------------------------------------------------------------------------------------------------------------------------------------------------------------------------------------------------------------------------------------------------------------------------------|---------|-----------------------------------------------------|-------------|---------|
|      | $wyz \cdot d(z, \text{TIME}), y) \cdot d(y, \text{TIME}) - d(wy \text{TIME} - wyx \cdot d(x, \text{TIME}) - wyy \cdot d(y, \text{TIME}) - wyz \cdot d(z, \text{TIME}), z) \cdot d(z, \text{TIME})$                                                                                                                                                                                                                                                                                                                                                    |         |                                                     |             |         |
| wztt | $d(wz \text{TIME} - wxz \cdot d(x, \text{TIME}) - wzy \cdot d(y, \text{TIME}) - wzz \cdot d(z, \text{TIME}), \text{TIME}) - d(wz \text{TIME} - wxz \cdot d(x, \text{TIME}) - wzy \cdot d(y, \text{TIME}) - wzz \cdot d(z, \text{TIME}), x) \cdot d(x, \text{TIME}) - d(wz \text{TIME} - wxz \cdot d(x, \text{TIME}) - wzy \cdot d(y, \text{TIME}) - wzz \cdot d(z, \text{TIME}), y) \cdot d(y, \text{TIME}) - d(wz \text{TIME} - wxz \cdot d(x, \text{TIME}) - wzy \cdot d(y, \text{TIME}) - wzz \cdot d(z, \text{TIME}), z) \cdot d(z, \text{TIME})$ | $1/s^3$ | Gradient of w, z component, second time derivative  | Domains 1–2 |         |
| ut   | $u \text{TIME} - ux \cdot d(x, \text{TIME}) - uy \cdot d(y, \text{TIME}) - uz \cdot d(z, \text{TIME})$                                                                                                                                                                                                                                                                                                                                                                                                                                                | $m/s^2$ | Velocity field, first time derivative, x component  | Domains 1–2 |         |
| vt   | $v \text{TIME} - vx \cdot d(x, \text{TIME}) - vy \cdot d(y, \text{TIME}) - vz \cdot d(z, \text{TIME})$                                                                                                                                                                                                                                                                                                                                                                                                                                                | $m/s^2$ | Velocity field, first time derivative, y component  | Domains 1–2 |         |
| wt   | $w \text{TIME} - wx \cdot d(x, \text{TIME}) - wy \cdot d(y, \text{TIME}) - wz \cdot d(z, \text{TIME})$                                                                                                                                                                                                                                                                                                                                                                                                                                                | $m/s^2$ | Velocity field, first time derivative, z component  | Domains 1–2 |         |
| utt  | $d(u \text{TIME} - ux \cdot d(x, \text{TIME}) - uy \cdot d(y, \text{TIME}) - uz \cdot d(z, \text{TIME}), \text{TIME}) - d(u \text{TIME} - ux \cdot d(x, \text{TIME}) - uy \cdot d(y, \text{TIME}) - uz \cdot d(z, \text{TIME}), x) \cdot d(x, \text{TIME}) - d(u \text{TIME} - ux \cdot d(x, \text{TIME}) - uy \cdot d(y, \text{TIME}) -$                                                                                                                                                                                                             | $m/s^3$ | Velocity field, second time derivative, x component | Domains 1–2 |         |

| Name | Expression                                                                                                                                                                                                                               | Unit                                 | Description                                         | Selection   | Details |
|------|------------------------------------------------------------------------------------------------------------------------------------------------------------------------------------------------------------------------------------------|--------------------------------------|-----------------------------------------------------|-------------|---------|
|      | uz*d(z,TIME),y)*d(y,TIME)-d(uTIME-ux*d(x,TIME)-uy*d(y,TIME)-uz*d(z,TIME),z)*d(z,TIME)                                                                                                                                                    |                                      |                                                     |             |         |
| vtt  | d(vTIME-vx*d(x,TIME)-vy*d(y,TIME)-vz*d(z,TIME),TIME)-d(vTIME-vx*d(x,TIME)-vy*d(y,TIME)-vz*d(z,TIME),x)*d(x,TIME)-d(vTIME-vx*d(x,TIME)-vy*d(y,TIME)-vz*d(z,TIME),y)*d(y,TIME)-d(vTIME-vx*d(x,TIME)-vy*d(y,TIME)-vz*d(z,TIME),z)*d(z,TIME) | m/s <sup>3</sup>                     | Velocity field, second time derivative, y component | Domains 1–2 |         |
| wtt  | d(wTIME-wx*d(x,TIME)-wy*d(y,TIME)-wz*d(z,TIME),TIME)-d(wTIME-wx*d(x,TIME)-wy*d(y,TIME)-wz*d(z,TIME),x)*d(x,TIME)-d(wTIME-wx*d(x,TIME)-wy*d(y,TIME)-wz*d(z,TIME),y)*d(y,TIME)-d(wTIME-wx*d(x,TIME)-wy*d(y,TIME)-wz*d(z,TIME),z)*d(z,TIME) | m/s <sup>3</sup>                     | Velocity field, second time derivative, z component | Domains 1–2 |         |
| p2xt | p2xTIME-p2xx*d(x,TIME)-p2xy*d(y,TIME)-p2xz*d(z,TIME)                                                                                                                                                                                     | kg/(m <sup>2</sup> .s <sup>3</sup> ) | Gradient of p2, x component, first time derivative  | Domains 1–2 |         |
| p2yt | p2yTIME-p2yx*d(x,TIME)-                                                                                                                                                                                                                  | kg/(m <sup>2</sup> .s <sup>3</sup> ) | Gradient of p2, y component, first                  | Domains 1–2 |         |

| Name  | Expression                                                                                                                                                                                                                                                                                                                                                                                                                                                                                                                                                        | Unit                                      | Description                                         | Selection   | Details |
|-------|-------------------------------------------------------------------------------------------------------------------------------------------------------------------------------------------------------------------------------------------------------------------------------------------------------------------------------------------------------------------------------------------------------------------------------------------------------------------------------------------------------------------------------------------------------------------|-------------------------------------------|-----------------------------------------------------|-------------|---------|
|       | $p2yy \cdot d(y, \text{TIME}) - p2yz \cdot d(z, \text{TIME})$                                                                                                                                                                                                                                                                                                                                                                                                                                                                                                     |                                           | time derivative                                     |             |         |
| p2zt  | $p2z\text{TIME} - p2zx \cdot d(x, \text{TIME}) - p2zy \cdot d(y, \text{TIME}) - p2zz \cdot d(z, \text{TIME})$                                                                                                                                                                                                                                                                                                                                                                                                                                                     | $\text{kg}/(\text{m}^2 \cdot \text{s}^3)$ | Gradient of p2, z component, first time derivative  | Domains 1–2 |         |
| p2xtt | $d(p2x\text{TIME} - p2xx \cdot d(x, \text{TIME}) - p2xy \cdot d(y, \text{TIME}) - p2xz \cdot d(z, \text{TIME}), \text{TIME}) - d(p2x\text{TIME} - p2xx \cdot d(x, \text{TIME}) - p2xy \cdot d(y, \text{TIME}) - p2xz \cdot d(z, \text{TIME}), x) \cdot d(x, \text{TIME}) - d(p2x\text{TIME} - p2xx \cdot d(x, \text{TIME}) - p2xy \cdot d(y, \text{TIME}) - p2xz \cdot d(z, \text{TIME}), y) \cdot d(y, \text{TIME}) - d(p2x\text{TIME} - p2xx \cdot d(x, \text{TIME}) - p2xy \cdot d(y, \text{TIME}) - p2xz \cdot d(z, \text{TIME}), z) \cdot d(z, \text{TIME})$ | $\text{kg}/(\text{m}^2 \cdot \text{s}^4)$ | Gradient of p2, x component, second time derivative | Domains 1–2 |         |
| p2ytt | $d(p2y\text{TIME} - p2yx \cdot d(x, \text{TIME}) - p2yy \cdot d(y, \text{TIME}) - p2yz \cdot d(z, \text{TIME}), \text{TIME}) - d(p2y\text{TIME} - p2yx \cdot d(x, \text{TIME}) - p2yy \cdot d(y, \text{TIME}) - p2yz \cdot d(z, \text{TIME}), x) \cdot d(x, \text{TIME}) - d(p2y\text{TIME} - p2yx \cdot d(x, \text{TIME}) - p2yy \cdot d(y, \text{TIME}) - p2yz \cdot d(z, \text{TIME}), y) \cdot d(y, \text{TIME}) - d(p2y\text{TIME} - p2yx \cdot d(x, \text{TIME}) - p2yy \cdot d(y, \text{TIME}) - p2yz \cdot d(z, \text{TIME}), z) \cdot d(z, \text{TIME})$ | $\text{kg}/(\text{m}^2 \cdot \text{s}^4)$ | Gradient of p2, y component, second time derivative | Domains 1–2 |         |
| p2ztt | $d(p2z\text{TIME} - p2zx \cdot d(x, \text{TIME}) - p2zy \cdot d(y, \text{TIME}) - p2zz \cdot d(z, \text{TIME}), \text{TIME}) - d(p2z\text{TIME} - p2zx \cdot d(x, \text{TIME}) -$                                                                                                                                                                                                                                                                                                                                                                                 | $\text{kg}/(\text{m}^2 \cdot \text{s}^4)$ | Gradient of p2, z component, second time derivative | Domains 1–2 |         |

| Name       | Expression                                                                                                                                                                                                                                                                                                                                                                                                                                            | Unit              | Description                            | Selection   | Details |
|------------|-------------------------------------------------------------------------------------------------------------------------------------------------------------------------------------------------------------------------------------------------------------------------------------------------------------------------------------------------------------------------------------------------------------------------------------------------------|-------------------|----------------------------------------|-------------|---------|
|            | $p_{2zy} \cdot d(y, TIME) - p_{2zz} \cdot d(z, TIME), x) \cdot d(x, TIME) - d(p_{2z} \cdot TIME - p_{2zx} \cdot d(x, TIME) - p_{2zy} \cdot d(y, TIME) - p_{2zz} \cdot d(z, TIME), y) \cdot d(y, TIME) - d(p_{2z} \cdot TIME - p_{2zx} \cdot d(x, TIME) - p_{2zy} \cdot d(y, TIME) - p_{2zz} \cdot d(z, TIME), z) \cdot d(z, TIME)$                                                                                                                    |                   |                                        |             |         |
| p2t        | $p_{2TIME} - p_{2x} \cdot d(x, TIME) - p_{2y} \cdot d(y, TIME) - p_{2z} \cdot d(z, TIME)$                                                                                                                                                                                                                                                                                                                                                             | Pa/s              | Pressure, first time derivative        | Domains 1–2 |         |
| p2tt       | $d(p_{2TIME} - p_{2x} \cdot d(x, TIME) - p_{2y} \cdot d(y, TIME) - p_{2z} \cdot d(z, TIME), TIME) - d(p_{2TIME} - p_{2x} \cdot d(x, TIME) - p_{2y} \cdot d(y, TIME) - p_{2z} \cdot d(z, TIME), x) \cdot d(x, TIME) - d(p_{2TIME} - p_{2x} \cdot d(x, TIME) - p_{2y} \cdot d(y, TIME) - p_{2z} \cdot d(z, TIME), y) \cdot d(y, TIME) - d(p_{2TIME} - p_{2x} \cdot d(x, TIME) - p_{2y} \cdot d(y, TIME) - p_{2z} \cdot d(z, TIME), z) \cdot d(z, TIME)$ | Pa/s <sup>2</sup> | Pressure, second time derivative       | Domains 1–2 |         |
| spf.Trho   | spf.Tref                                                                                                                                                                                                                                                                                                                                                                                                                                              | K                 | Temperature for density evaluation     | Domains 1–2 |         |
| spf.prho   | spf.pref                                                                                                                                                                                                                                                                                                                                                                                                                                              | Pa                | Pressure for the evaluation of density | Domains 1–2 |         |
| spf.rhoref | subst(material.rho, spf.fp1.minput_temperature, spf.Tref, spf.fp1.minput_pressure, spf.pref)                                                                                                                                                                                                                                                                                                                                                          | kg/m <sup>3</sup> | Reference density                      | Domains 1–2 | Meta    |
| spf.mumat  | material.mu                                                                                                                                                                                                                                                                                                                                                                                                                                           | Pa-s              | Dynamic viscosity                      | Domains 1–2 | Meta    |

| Name       | Expression      | Unit | Description                        | Selection   | Details |
|------------|-----------------|------|------------------------------------|-------------|---------|
| spf.srijxx | $u_x$           | 1/s  | Strain rate tensor, xx component   | Domains 1–2 |         |
| spf.srijyx | $0.5*(v_x+u_y)$ | 1/s  | Strain rate tensor, yx component   | Domains 1–2 |         |
| spf.srijzx | $0.5*(w_x+u_z)$ | 1/s  | Strain rate tensor, zx component   | Domains 1–2 |         |
| spf.srijxy | $0.5*(u_y+v_x)$ | 1/s  | Strain rate tensor, xy component   | Domains 1–2 |         |
| spf.srijyy | $v_y$           | 1/s  | Strain rate tensor, yy component   | Domains 1–2 |         |
| spf.srijzy | $0.5*(w_y+v_z)$ | 1/s  | Strain rate tensor, zy component   | Domains 1–2 |         |
| spf.srijxz | $0.5*(u_z+w_x)$ | 1/s  | Strain rate tensor, xz component   | Domains 1–2 |         |
| spf.srijyz | $0.5*(v_z+w_y)$ | 1/s  | Strain rate tensor, yz component   | Domains 1–2 |         |
| spf.srijzz | $w_z$           | 1/s  | Strain rate tensor, zz component   | Domains 1–2 |         |
| spf.rrijxx | 0               | 1/s  | Rotation rate tensor, xx component | Domains 1–2 |         |
| spf.rrijyx | $0.5*(v_x-u_y)$ | 1/s  | Rotation rate tensor, yx component | Domains 1–2 |         |
| spf.rrijzx | $0.5*(w_x-u_z)$ | 1/s  | Rotation rate tensor, zx component | Domains 1–2 |         |
| spf.rrijxy | $0.5*(u_y-v_x)$ | 1/s  | Rotation rate tensor, xy component | Domains 1–2 |         |
| spf.rrijyy | 0               | 1/s  | Rotation rate tensor, yy component | Domains 1–2 |         |
| spf.rrijzy | $0.5*(w_y-v_z)$ | 1/s  | Rotation rate                      | Domains 1–2 |         |

| Name       | Expression                                                                                                                                          | Unit             | Description                        | Selection   | Details     |
|------------|-----------------------------------------------------------------------------------------------------------------------------------------------------|------------------|------------------------------------|-------------|-------------|
|            |                                                                                                                                                     |                  | tensor, zy component               |             |             |
| spf.rrijxz | $0.5*(uz-wx)$                                                                                                                                       | 1/s              | Rotation rate tensor, xz component | Domains 1–2 |             |
| spf.rrijyz | $0.5*(vz-wy)$                                                                                                                                       | 1/s              | Rotation rate tensor, yz component | Domains 1–2 |             |
| spf.rrijzz | 0                                                                                                                                                   | 1/s              | Rotation rate tensor, zz component | Domains 1–2 |             |
| spf.sr     | $\sqrt{2*spf.srijxx^2+2*spf.srijxy^2+2*spf.srijxz^2+2*spf.srijyx^2+2*spf.srijyy^2+2*spf.srijyz^2+2*spf.srijzx^2+2*spf.srijzy^2+2*spf.srijzz^2+eps}$ | 1/s              | Shear rate                         | Domains 1–2 |             |
| spf.rr     | $\sqrt{2*spf.rrijxx^2+2*spf.rrijxy^2+2*spf.rrijxz^2+2*spf.rrijyx^2+2*spf.rrijyy^2+2*spf.rrijyz^2+2*spf.rrijzx^2+2*spf.rrijzy^2+2*spf.rrijzz^2+eps}$ | 1/s              | Rotation rate                      | Domains 1–2 |             |
| spf.divu   | $ux+vy+wz$                                                                                                                                          | 1/s              | Divergence of velocity field       | Domains 1–2 |             |
| spf.Fx     | $spf.rho*(u*d(d(x,TIME),X)+v*d(d(y,TIME),X))+w*d(d(z,TIME),X))$                                                                                     | N/m <sup>3</sup> | Volume force, x component          | Domain 2    | + operation |
| spf.Fy     | $spf.rho*(u*d(d(x,TIME),Y)+v*d(d(y,TIME),Y))+w*d(d(z,TIME),Y))$                                                                                     | N/m <sup>3</sup> | Volume force, y component          | Domain 2    | + operation |
| spf.Fz     | $spf.rho*(u*d(d(x,TIME),Z)+v*d(d(y,TIME),Z))+w*d(d(z,TIME),Z))$                                                                                     | N/m <sup>3</sup> | Volume force, z component          | Domain 2    | + operation |
| spf.Fx     | 0                                                                                                                                                   | N/m <sup>3</sup> | Volume force, x component          | Domain 1    | + operation |
| spf.Fy     | 0                                                                                                                                                   | N/m <sup>3</sup> | Volume force, y component          | Domain 1    | + operation |
| spf.Fz     | 0                                                                                                                                                   | N/m <sup>3</sup> | Volume force, z component          | Domain 1    | + operation |
| spf.U      | $\sqrt{u^2+v^2+w^2}$                                                                                                                                | m/s              | Velocity                           | Domains 1–2 |             |

| Name           | Expression                                                                                                                                                                                      | Unit                   | Description                            | Selection        | Details     |
|----------------|-------------------------------------------------------------------------------------------------------------------------------------------------------------------------------------------------|------------------------|----------------------------------------|------------------|-------------|
|                |                                                                                                                                                                                                 |                        | magnitude                              |                  |             |
| spf.vorticityx | wy-vz                                                                                                                                                                                           | 1/s                    | Vorticity field, x component           | Domains 1–2      |             |
| spf.vorticityy | -wx+uz                                                                                                                                                                                          | 1/s                    | Vorticity field, y component           | Domains 1–2      |             |
| spf.vorticityz | vx-uy                                                                                                                                                                                           | 1/s                    | Vorticity field, z component           | Domains 1–2      |             |
| spf.vort_magn  | $\sqrt{\text{spf.vorticityx}^2 + \text{spf.vorticityy}^2 + \text{spf.vorticityz}^2}$                                                                                                            | 1/s                    | Vorticity magnitude                    | Domains 1–2      |             |
| spf.cellRe     | $0.25 \cdot \text{spf.rho} \cdot \sqrt{\text{emetric\_spatial}(\text{u-d}(x, \text{TIME}), \text{v-d}(y, \text{TIME}), \text{w-d}(z, \text{TIME})) / \text{emetric2\_spatial}} / \text{spf.mu}$ | 1                      | Cell Reynolds number                   | Domains 1–2      |             |
| spf.nu         | $\text{spf.mu} / \text{spf.rho}$                                                                                                                                                                | m <sup>2</sup> /s      | Kinematic viscosity                    | Domains 1–2      |             |
| spf.betaT      | 0                                                                                                                                                                                               | 1/Pa                   | Isothermal compressibility coefficient | Domains 1–2      |             |
| spf.Qm         | 0                                                                                                                                                                                               | kg/(m <sup>3</sup> ·s) | Source term                            | Domains 1–2      | + operation |
| spf.mu_eff     | $\text{spf.mu} + \text{spf.muT}$                                                                                                                                                                | Pa·s                   | Dynamic viscosity                      | Domains 1–2      |             |
| spf.muT        | $\text{nojac}(\max(\text{spf.rho} \cdot \text{spf.lsubstar} \cdot \sqrt{\text{spf.k\_nn}}, 0.5 \cdot \text{spf.mu}))$                                                                           | Pa·s                   | Turbulent dynamic viscosity            | Domains 1–2      |             |
| spf.T_stressx  | $\text{spf.K\_stressx} - p^2 \cdot \text{spf.nxmesh}$                                                                                                                                           | N/m <sup>2</sup>       | Total stress, x component              | Boundaries 1–114 | + operation |
| spf.T_stressy  | $\text{spf.K\_stressy} - p^2 \cdot \text{spf.nymesh}$                                                                                                                                           | N/m <sup>2</sup>       | Total stress, y component              | Boundaries 1–114 | + operation |
| spf.T_stressz  | $\text{spf.K\_stressz} - p^2 \cdot \text{spf.nzmesh}$                                                                                                                                           | N/m <sup>2</sup>       | Total stress, z component              | Boundaries 1–114 | + operation |
| spf.K_stressx  | $\text{spf.mu\_eff} \cdot (2 \cdot \text{ux} \cdot \text{spf.nxmesh} + (\text{uy} + \text{vx}) \cdot \text{spf.nymesh} + (\text{uz} + \text{wx}) \cdot \text{spf.nzmesh})$                      | N/m <sup>2</sup>       | Viscous stress, x component            | Boundaries 1–114 | + operation |
| spf.K_stressy  | $\text{spf.mu\_eff} \cdot ((\text{vx} + \text{uy}) \cdot \text{spf.nxmesh} + 2 \cdot \text{vy} \cdot \text{spf.nymesh} + (\text{vz} + \text{wy}) \cdot \text{spf.nzmesh})$                      | N/m <sup>2</sup>       | Viscous stress, y component            | Boundaries 1–114 | + operation |
| spf.K_stressz  | $\text{spf.mu\_eff} \cdot ((\text{wx} + \text{uz}) \cdot$                                                                                                                                       | N/m <sup>2</sup>       | Viscous stress, z                      | Boundaries 1–    | + operation |

| Name                           | Expression                                             | Unit             | Description                                    | Selection   | Details     |
|--------------------------------|--------------------------------------------------------|------------------|------------------------------------------------|-------------|-------------|
|                                | spf.nxmesh+(wy+vz)<br>*spf.nymesh+2*wz*s<br>pf.nzmesh) |                  | component                                      | 114         |             |
| spf.K_stress_tenso<br>rxx      | 2*spf.mu_eff*ux                                        | N/m <sup>2</sup> | Viscous stress<br>tensor, xx<br>component      | Domains 1–2 | + operation |
| spf.K_stress_tenso<br>ryx      | spf.mu_eff*(vx+uy)                                     | N/m <sup>2</sup> | Viscous stress<br>tensor, yx<br>component      | Domains 1–2 | + operation |
| spf.K_stress_tenso<br>rzx      | spf.mu_eff*(wx+uz)                                     | N/m <sup>2</sup> | Viscous stress<br>tensor, zx<br>component      | Domains 1–2 | + operation |
| spf.K_stress_tenso<br>rxy      | spf.mu_eff*(uy+vx)                                     | N/m <sup>2</sup> | Viscous stress<br>tensor, xy<br>component      | Domains 1–2 | + operation |
| spf.K_stress_tenso<br>ryy      | 2*spf.mu_eff*vy                                        | N/m <sup>2</sup> | Viscous stress<br>tensor, yy<br>component      | Domains 1–2 | + operation |
| spf.K_stress_tenso<br>rzy      | spf.mu_eff*(wy+vz)                                     | N/m <sup>2</sup> | Viscous stress<br>tensor, zy<br>component      | Domains 1–2 | + operation |
| spf.K_stress_tenso<br>rxz      | spf.mu_eff*(uz+wx)                                     | N/m <sup>2</sup> | Viscous stress<br>tensor, xz<br>component      | Domains 1–2 | + operation |
| spf.K_stress_tenso<br>ryz      | spf.mu_eff*(vz+wy)                                     | N/m <sup>2</sup> | Viscous stress<br>tensor, yz<br>component      | Domains 1–2 | + operation |
| spf.K_stress_tenso<br>rzz      | 2*spf.mu_eff*wz                                        | N/m <sup>2</sup> | Viscous stress<br>tensor, zz<br>component      | Domains 1–2 | + operation |
| spf.K_stress_tenso<br>r_testxx | 2*spf.mu_eff*test(ux)                                  | N/m <sup>2</sup> | Viscous stress<br>tensor test, xx<br>component | Domains 1–2 | + operation |
| spf.K_stress_tenso<br>r_testyx | spf.mu_eff*(test(vx)+<br>test(uy))                     | N/m <sup>2</sup> | Viscous stress<br>tensor test, yx<br>component | Domains 1–2 | + operation |
| spf.K_stress_tenso<br>r_testzx | spf.mu_eff*(test(wx)<br>+test(uz))                     | N/m <sup>2</sup> | Viscous stress<br>tensor test, zx<br>component | Domains 1–2 | + operation |
| spf.K_stress_tenso<br>r_testxy | spf.mu_eff*(test(uy)+<br>test(vx))                     | N/m <sup>2</sup> | Viscous stress<br>tensor test, xy<br>component | Domains 1–2 | + operation |
| spf.K_stress_tenso             | 2*spf.mu_eff*test(vy)                                  | N/m <sup>2</sup> | Viscous stress                                 | Domains 1–2 | + operation |



| Name                       | Expression                                                                                  | Unit                           | Description                              | Selection   | Details     |
|----------------------------|---------------------------------------------------------------------------------------------|--------------------------------|------------------------------------------|-------------|-------------|
| r_testyy                   |                                                                                             |                                | tensor test, yy component                |             |             |
| spf.K_stress_tensor_testzy | spf.mu_eff*(test(wy)+test(vz))                                                              | N/m <sup>2</sup>               | Viscous stress tensor test, zy component | Domains 1–2 | + operation |
| spf.K_stress_tensor_testxz | spf.mu_eff*(test(uz)+test(wx))                                                              | N/m <sup>2</sup>               | Viscous stress tensor test, xz component | Domains 1–2 | + operation |
| spf.K_stress_tensor_testyz | spf.mu_eff*(test(vz)+test(wy))                                                              | N/m <sup>2</sup>               | Viscous stress tensor test, yz component | Domains 1–2 | + operation |
| spf.K_stress_tensor_testzz | 2*spf.mu_eff*test(wz)                                                                       | N/m <sup>2</sup>               | Viscous stress tensor test, zz component | Domains 1–2 | + operation |
| spf.upwind_helpx           | u-d(x,TIME)                                                                                 | m/s                            | Upwind term, x component                 | Domains 1–2 | + operation |
| spf.upwind_helpy           | v-d(y,TIME)                                                                                 | m/s                            | Upwind term, y component                 | Domains 1–2 | + operation |
| spf.upwind_helpz           | w-d(z,TIME)                                                                                 | m/s                            | Upwind term, z component                 | Domains 1–2 | + operation |
| spf.muinit                 | subst(material.mu,spf.fp1.mininput_temperature,spf.Tref,spf.fp1.mininput_pressure,spf.pref) | Pa·s                           | Dynamic viscosity                        | Domains 1–2 | Meta        |
| spf.rhoinit                | spf.rho                                                                                     | kg/m <sup>3</sup>              | Density                                  | Domains 1–2 |             |
| spf.l_mix_lim              | 2*spf.lref                                                                                  | m                              | Mixing length limit                      | Domains 1–2 |             |
| spf.k_pos                  | spf.k_nn+eps                                                                                | m <sup>2</sup> /s <sup>2</sup> | Regularized turbulent kinetic energy     | Domains 1–2 |             |
| spf.ep_nn                  | max(ep2,0)                                                                                  | m <sup>2</sup> /s <sup>3</sup> | Regularized turbulent dissipation rate   | Domains 1–2 |             |
| spf.ep_pos                 | spf.ep_nn+eps                                                                               | m <sup>2</sup> /s <sup>3</sup> |                                          | Domains 1–2 |             |
| spf.Sxx                    | ux                                                                                          | 1/s                            | Strain rate, xx component                | Domains 1–2 | + operation |
| spf.Syx                    | 0.5*(vx+uy)                                                                                 | 1/s                            | Strain rate, yx component                | Domains 1–2 | + operation |
| spf.Szx                    | 0.5*(wx+uz)                                                                                 | 1/s                            | Strain rate, zx component                | Domains 1–2 | + operation |
| spf.Sxy                    | 0.5*(uy+vx)                                                                                 | 1/s                            | Strain rate, xy                          | Domains 1–2 | + operation |

| Name         | Expression                                                                                                                                                                                                                                                                                | Unit                   | Description                                | Selection   | Details     |
|--------------|-------------------------------------------------------------------------------------------------------------------------------------------------------------------------------------------------------------------------------------------------------------------------------------------|------------------------|--------------------------------------------|-------------|-------------|
|              |                                                                                                                                                                                                                                                                                           |                        | component                                  |             |             |
| spf.Syy      | vy                                                                                                                                                                                                                                                                                        | 1/s                    | Strain rate, yy component                  | Domains 1–2 | + operation |
| spf.Szy      | 0.5*(wy+vz)                                                                                                                                                                                                                                                                               | 1/s                    | Strain rate, zy component                  | Domains 1–2 | + operation |
| spf.Sxz      | 0.5*(uz+wx)                                                                                                                                                                                                                                                                               | 1/s                    | Strain rate, xz component                  | Domains 1–2 | + operation |
| spf.Syz      | 0.5*(vz+wy)                                                                                                                                                                                                                                                                               | 1/s                    | Strain rate, yz component                  | Domains 1–2 | + operation |
| spf.Szz      | wz                                                                                                                                                                                                                                                                                        | 1/s                    | Strain rate, zz component                  | Domains 1–2 | + operation |
| spf.AbsS     | $\sqrt{\max(\text{spf.Sxx}^2 + \text{spf.Sxy}^2 + \text{spf.Sxz}^2 + \text{spf.Syx}^2 + \text{spf.Syy}^2 + \text{spf.Syz}^2 + \text{spf.Szx}^2 + \text{spf.Szy}^2 + \text{spf.Szz}^2, 0)}$                                                                                                | 1/s                    | Absolute strain rate                       | Domains 1–2 |             |
| spf.rF       | $\sqrt{1/6}/\max(\text{spf.AbsS}, \text{eps})$                                                                                                                                                                                                                                            | s                      | Help variable                              | Domains 1–2 |             |
| spf.rFInv    | $\sqrt{6} * \text{spf.AbsS}$                                                                                                                                                                                                                                                              | 1/s                    | Help variable                              | Domains 1–2 |             |
| spf.lcore    | $\min(\text{spf.C\_mu} * \text{spf.k\_nn}^{1.5} / \text{spf.ep\_pos}, \sqrt{\text{spf.k\_nn}} * \text{spf.rF})$                                                                                                                                                                           | m                      | Help variable                              | Domains 1–2 |             |
| spf.lsubstar | $\text{nojac}(\min(\text{spf.lcore}, \text{spf.l\_mix\_lim}))$                                                                                                                                                                                                                            | m                      | Limited mixing length                      | Domains 1–2 |             |
| spf.nuT      | $\text{spf.muT} / \text{spf.rho}$                                                                                                                                                                                                                                                         | m <sup>2</sup> /s      | Turbulent kinematic viscosity              | Domains 1–2 |             |
| spf.linSCk   | $-\text{spf.rho} * (\text{spf.gammaT} - \min(\text{spf.Pkb\_mul}, 0) / \max(\text{spf.rho}, \text{eps}))$                                                                                                                                                                                 | kg/(m <sup>3</sup> ·s) | Linear source term coefficient, k-equation | Domains 1–2 |             |
| spf.linSCeps | $-\text{spf.rho} * (\text{spf.Ceps2} * \text{spf.gammaT} - \min(\text{spf.Pepb\_mul}, 0) / \max(\text{spf.rho}, \text{eps}))$                                                                                                                                                             | kg/(m <sup>3</sup> ·s) | Linear source term coefficient             | Domains 1–2 |             |
| spf.PCore    | $2 * \text{ux}^2 + \text{uy} * (\text{uy} + \text{vx}) + \text{uz} * (\text{uz} + \text{wx}) + \text{vx} * (\text{uy} + \text{vx}) + 2 * \text{vy}^2 + \text{vz} * (\text{vz} + \text{wy}) + \text{wx} * (\text{uz} + \text{wx}) + \text{wy} * (\text{vz} + \text{wy}) + 2 * \text{wz}^2$ | 1/s <sup>2</sup>       | Turbulent kinetic energy source term       | Domains 1–2 | + operation |

| Name          | Expression                                                                                                                                                   | Unit                                    | Description                                              | Selection   | Details     |
|---------------|--------------------------------------------------------------------------------------------------------------------------------------------------------------|-----------------------------------------|----------------------------------------------------------|-------------|-------------|
| spf.Pk        | $\text{nojac}(\max(\text{spf.muT} * \text{spf.PCore}, 0)) + \text{nojac}(\max(\text{spf.Pkb\_mul}, 0) * k2)$                                                 | $\text{W/m}^3$                          | Turbulent kinetic energy source term                     | Domains 1–2 |             |
| spf.Peps      | $\text{nojac}(\max(\text{spf.Ceps1} * \text{spf.gammaT} * \text{spf.muT} * \text{spf.PCore}, 0)) + \text{nojac}(\max(\text{spf.Pepb\_mul}, 0) * \text{ep2})$ | $\text{Pa/s}^2$                         |                                                          | Domains 1–2 |             |
| spf.kinit     | $(10 * \text{spf.muinit} / (\text{spf.rhoinit} * \text{spf.l\_mix\_lim}))^2$                                                                                 | $\text{m}^2/\text{s}^2$                 | Turbulent kinetic energy                                 | Domains 1–2 |             |
| spf.epinit    | $10 * \text{spf.C\_mu} * \text{spf.kinit}^{1.5} / \text{spf.l\_mix\_lim}$                                                                                    | $\text{m}^2/\text{s}^3$                 | Turbulent dissipation rate                               | Domains 1–2 |             |
| spf.gammaT    | $\text{nojac}(\text{spf.C\_mu} * \text{spf.rho} * \text{spf.k\_nn} / \text{spf.muT})$                                                                        | $1/\text{s}$                            | Turbulence help variable                                 | Domains 1–2 |             |
| spf.tauT      | $\text{spf.muT} / \text{nojac}(\text{spf.C\_mu} * \text{spf.rho} * \text{spf.k\_pos})$                                                                       | $\text{s}$                              | Turbulence time scale                                    | Domains 1–2 |             |
| spf.ep_global | ep2                                                                                                                                                          | $\text{m}^2/\text{s}^3$                 | Turbulent dissipation rate, (all cells)                  | Domains 1–2 |             |
| spf.Pkb       | $\text{spf.Pkb\_mul} * k2$                                                                                                                                   | $\text{W/m}^3$                          | Buoyancy-induced production of turbulence kinetic energy | Domains 1–2 | + operation |
| spf.Pkb_mul   | 0                                                                                                                                                            | $\text{kg}/(\text{m}^3 \cdot \text{s})$ | Help variable                                            | Domains 1–2 | + operation |
| spf.Pepb_mul  | 0                                                                                                                                                            | $\text{kg}/(\text{m}^3 \cdot \text{s})$ | Help variable                                            | Domains 1–2 | + operation |
| k2xt          | $k2x\text{TIME} - k2xx * d(x, \text{TIME}) - k2xy * d(y, \text{TIME}) - k2xz * d(z, \text{TIME})$                                                            | $\text{m/s}^3$                          | Gradient of k2, x component, first time derivative       | Domains 1–2 |             |
| k2yt          | $k2y\text{TIME} - k2yx * d(x, \text{TIME}) - k2yy * d(y, \text{TIME}) - k2yz * d(z, \text{TIME})$                                                            | $\text{m/s}^3$                          | Gradient of k2, y component, first time derivative       | Domains 1–2 |             |
| k2zt          | $k2z\text{TIME} - k2zx * d(x, \text{TIME}) - k2zy * d(y, \text{TIME}) - k2zz * d(z, \text{TIME})$                                                            | $\text{m/s}^3$                          | Gradient of k2, z component, first time derivative       | Domains 1–2 |             |
| k2xtt         | $d(k2x\text{TIME} -$                                                                                                                                         | $\text{m/s}^4$                          | Gradient of k2, x                                        | Domains 1–2 |             |

| Name  | Expression                                                                                                                                                                                                                                                                                                                                                                                                                                                                                                                                                                                                                                                                                           | Unit             | Description                                         | Selection   | Details |
|-------|------------------------------------------------------------------------------------------------------------------------------------------------------------------------------------------------------------------------------------------------------------------------------------------------------------------------------------------------------------------------------------------------------------------------------------------------------------------------------------------------------------------------------------------------------------------------------------------------------------------------------------------------------------------------------------------------------|------------------|-----------------------------------------------------|-------------|---------|
|       | $k_{2xx} \frac{d}{dt}(x, \text{TIME}) - k_{2xy} \frac{d}{dt}(y, \text{TIME}) - k_{2xz} \frac{d}{dt}(z, \text{TIME}), \text{TIME})$<br>$-d(k_{2x} \text{TIME} - k_{2xx} \frac{d}{dt}(x, \text{TIME}) - k_{2xy} \frac{d}{dt}(y, \text{TIME}) - k_{2xz} \frac{d}{dt}(z, \text{TIME}), x) \frac{d}{dt}(x, \text{TIME}) - d(k_{2x} \text{TIME} - k_{2xx} \frac{d}{dt}(x, \text{TIME}) - k_{2xy} \frac{d}{dt}(y, \text{TIME}) - k_{2xz} \frac{d}{dt}(z, \text{TIME}), y) \frac{d}{dt}(y, \text{TIME}) - d(k_{2x} \text{TIME} - k_{2xx} \frac{d}{dt}(x, \text{TIME}) - k_{2xy} \frac{d}{dt}(y, \text{TIME}) - k_{2xz} \frac{d}{dt}(z, \text{TIME}), z) \frac{d}{dt}(z, \text{TIME})$                        |                  | component, second time derivative                   |             |         |
| k2ytt | $d(k_{2y} \text{TIME} - k_{2yx} \frac{d}{dt}(x, \text{TIME}) - k_{2yy} \frac{d}{dt}(y, \text{TIME}) - k_{2yz} \frac{d}{dt}(z, \text{TIME}), \text{TIME})$<br>$-d(k_{2y} \text{TIME} - k_{2yx} \frac{d}{dt}(x, \text{TIME}) - k_{2yy} \frac{d}{dt}(y, \text{TIME}) - k_{2yz} \frac{d}{dt}(z, \text{TIME}), x) \frac{d}{dt}(x, \text{TIME}) - d(k_{2y} \text{TIME} - k_{2yx} \frac{d}{dt}(x, \text{TIME}) - k_{2yy} \frac{d}{dt}(y, \text{TIME}) - k_{2yz} \frac{d}{dt}(z, \text{TIME}), y) \frac{d}{dt}(y, \text{TIME}) - d(k_{2y} \text{TIME} - k_{2yx} \frac{d}{dt}(x, \text{TIME}) - k_{2yy} \frac{d}{dt}(y, \text{TIME}) - k_{2yz} \frac{d}{dt}(z, \text{TIME}), z) \frac{d}{dt}(z, \text{TIME})$ | m/s <sup>4</sup> | Gradient of k2, y component, second time derivative | Domains 1–2 |         |
| k2ztt | $d(k_{2z} \text{TIME} - k_{2zx} \frac{d}{dt}(x, \text{TIME}) - k_{2zy} \frac{d}{dt}(y, \text{TIME}) - k_{2zz} \frac{d}{dt}(z, \text{TIME}), \text{TIME})$<br>$-d(k_{2z} \text{TIME} - k_{2zx} \frac{d}{dt}(x, \text{TIME}) - k_{2zy} \frac{d}{dt}(y, \text{TIME}) - k_{2zz} \frac{d}{dt}(z, \text{TIME}), x) \frac{d}{dt}(x, \text{TIME}) - d(k_{2z} \text{TIME} - k_{2zx} \frac{d}{dt}(x, \text{TIME}) - k_{2zy} \frac{d}{dt}(y, \text{TIME}) - k_{2zz} \frac{d}{dt}(z, \text{TIME}), y) \frac{d}{dt}(y, \text{TIME}) - d(k_{2z} \text{TIME} - k_{2zx} \frac{d}{dt}(x, \text{TIME}) - k_{2zy} \frac{d}{dt}(y, \text{TIME}) - k_{2zz} \frac{d}{dt}(z, \text{TIME}), z) \frac{d}{dt}(z, \text{TIME})$ | m/s <sup>4</sup> | Gradient of k2, z component, second time derivative | Domains 1–2 |         |

| Name   | Expression                                                                                                                                                                                                                                                                                                                                                                                            | Unit      | Description                                          | Selection   | Details |
|--------|-------------------------------------------------------------------------------------------------------------------------------------------------------------------------------------------------------------------------------------------------------------------------------------------------------------------------------------------------------------------------------------------------------|-----------|------------------------------------------------------|-------------|---------|
|        | $k2zy \cdot d(y, TIME) - k2zz \cdot d(z, TIME), z) \cdot d(z, TIME)$                                                                                                                                                                                                                                                                                                                                  |           |                                                      |             |         |
| k2t    | $k2TIME - k2x \cdot d(x, TIME) - k2y \cdot d(y, TIME) - k2z \cdot d(z, TIME)$                                                                                                                                                                                                                                                                                                                         | $m^2/s^3$ | Turbulent kinetic energy, first time derivative      | Domains 1–2 |         |
| k2tt   | $d(k2TIME - k2x \cdot d(x, TIME) - k2y \cdot d(y, TIME) - k2z \cdot d(z, TIME), TIME) - d(k2TIME - k2x \cdot d(x, TIME) - k2y \cdot d(y, TIME) - k2z \cdot d(z, TIME), x) \cdot d(x, TIME) - d(k2TIME - k2x \cdot d(x, TIME) - k2y \cdot d(y, TIME) - k2z \cdot d(z, TIME), y) \cdot d(y, TIME) - d(k2TIME - k2x \cdot d(x, TIME) - k2y \cdot d(y, TIME) - k2z \cdot d(z, TIME), z) \cdot d(z, TIME)$ | $m^2/s^4$ | Turbulent kinetic energy, second time derivative     | Domains 1–2 |         |
| ep2xt  | $ep2xTIME - ep2xx \cdot d(x, TIME) - ep2xy \cdot d(y, TIME) - ep2xz \cdot d(z, TIME)$                                                                                                                                                                                                                                                                                                                 | $m/s^4$   | Gradient of ep2, x component, first time derivative  | Domains 1–2 |         |
| ep2yt  | $ep2yTIME - ep2yx \cdot d(x, TIME) - ep2yy \cdot d(y, TIME) - ep2yz \cdot d(z, TIME)$                                                                                                                                                                                                                                                                                                                 | $m/s^4$   | Gradient of ep2, y component, first time derivative  | Domains 1–2 |         |
| ep2zt  | $ep2zTIME - ep2zx \cdot d(x, TIME) - ep2zy \cdot d(y, TIME) - ep2zz \cdot d(z, TIME)$                                                                                                                                                                                                                                                                                                                 | $m/s^4$   | Gradient of ep2, z component, first time derivative  | Domains 1–2 |         |
| ep2xtt | $d(ep2xTIME - ep2xx \cdot d(x, TIME) - ep2xy \cdot d(y, TIME) - ep2xz \cdot d(z, TIME), TIME) - d(ep2xTIME - ep2xx \cdot d(x, TIME) - ep2xy \cdot d(y, TIME) - ep2xz \cdot d(z, TIME), x) \cdot d(x, TIME) - d(ep2xTIME -$                                                                                                                                                                            | $m/s^5$   | Gradient of ep2, x component, second time derivative | Domains 1–2 |         |

| Name   | Expression                                                                                                                                                                                                                                                                                                                                                                                                                                                                                                                                                                                                                                                                                                      | Unit             | Description                                          | Selection   | Details |
|--------|-----------------------------------------------------------------------------------------------------------------------------------------------------------------------------------------------------------------------------------------------------------------------------------------------------------------------------------------------------------------------------------------------------------------------------------------------------------------------------------------------------------------------------------------------------------------------------------------------------------------------------------------------------------------------------------------------------------------|------------------|------------------------------------------------------|-------------|---------|
|        | $\begin{aligned} & \text{ep2xx} \cdot d(x, \text{TIME}) - \text{ep2xy} \cdot d(y, \text{TIME}) - \text{ep2xz} \cdot d(z, \text{TIME}), y) \cdot d(y, \text{TIME}) - \\ & d(\text{ep2xTIME} - \text{ep2xx} \cdot d(x, \text{TIME}) - \text{ep2xy} \cdot d(y, \text{TIME}) - \text{ep2xz} \cdot d(z, \text{TIME}), z) \cdot d(z, \text{TIME}) \end{aligned}$                                                                                                                                                                                                                                                                                                                                                      |                  |                                                      |             |         |
| ep2ytt | $\begin{aligned} & d(\text{ep2yTIME} - \text{ep2yx} \cdot d(x, \text{TIME}) - \text{ep2yy} \cdot d(y, \text{TIME}) - \text{ep2yz} \cdot d(z, \text{TIME}), \text{TIME}) - d(\text{ep2yTIME} - \text{ep2yx} \cdot d(x, \text{TIME}) - \text{ep2yy} \cdot d(y, \text{TIME}) - \text{ep2yz} \cdot d(z, \text{TIME}), x) \cdot d(x, \text{TIME}) - \\ & d(\text{ep2yTIME} - \text{ep2yx} \cdot d(x, \text{TIME}) - \text{ep2yy} \cdot d(y, \text{TIME}) - \text{ep2yz} \cdot d(z, \text{TIME}), y) \cdot d(y, \text{TIME}) - \\ & d(\text{ep2yTIME} - \text{ep2yx} \cdot d(x, \text{TIME}) - \text{ep2yy} \cdot d(y, \text{TIME}) - \text{ep2yz} \cdot d(z, \text{TIME}), z) \cdot d(z, \text{TIME}) \end{aligned}$ | m/s <sup>5</sup> | Gradient of ep2, y component, second time derivative | Domains 1–2 |         |
| ep2ztt | $\begin{aligned} & d(\text{ep2zTIME} - \text{ep2zx} \cdot d(x, \text{TIME}) - \text{ep2zy} \cdot d(y, \text{TIME}) - \text{ep2zz} \cdot d(z, \text{TIME}), \text{TIME}) - d(\text{ep2zTIME} - \text{ep2zx} \cdot d(x, \text{TIME}) - \text{ep2zy} \cdot d(y, \text{TIME}) - \text{ep2zz} \cdot d(z, \text{TIME}), x) \cdot d(x, \text{TIME}) - \\ & d(\text{ep2zTIME} - \text{ep2zx} \cdot d(x, \text{TIME}) - \text{ep2zy} \cdot d(y, \text{TIME}) - \text{ep2zz} \cdot d(z, \text{TIME}), y) \cdot d(y, \text{TIME}) - \\ & d(\text{ep2zTIME} - \text{ep2zx} \cdot d(x, \text{TIME}) - \text{ep2zy} \cdot d(y, \text{TIME}) - \text{ep2zz} \cdot d(z, \text{TIME}), z) \cdot d(z, \text{TIME}) \end{aligned}$ | m/s <sup>5</sup> | Gradient of ep2, z component, second time derivative | Domains 1–2 |         |

| Name         | Expression                                                                                                                                                                                                                                                                                                                               | Unit                           | Description                                                 | Selection   | Details     |
|--------------|------------------------------------------------------------------------------------------------------------------------------------------------------------------------------------------------------------------------------------------------------------------------------------------------------------------------------------------|--------------------------------|-------------------------------------------------------------|-------------|-------------|
| ep2t         | ep2TIME-<br>ep2x*d(x,TIME)-<br>ep2y*d(y,TIME)-<br>ep2z*d(z,TIME)                                                                                                                                                                                                                                                                         | m <sup>2</sup> /s <sup>4</sup> | Turbulent<br>dissipation rate,<br>first time<br>derivative  | Domains 1–2 |             |
| ep2tt        | d(ep2TIME-<br>ep2x*d(x,TIME)-<br>ep2y*d(y,TIME)-<br>ep2z*d(z,TIME),TIME)<br>-d(ep2TIME-<br>ep2x*d(x,TIME)-<br>ep2y*d(y,TIME)-<br>ep2z*d(z,TIME),x)*d(<br>x,TIME)-d(ep2TIME-<br>ep2x*d(x,TIME)-<br>ep2y*d(y,TIME)-<br>ep2z*d(z,TIME),y)*d(<br>y,TIME)-d(ep2TIME-<br>ep2x*d(x,TIME)-<br>ep2y*d(y,TIME)-<br>ep2z*d(z,TIME),z)*d(z<br>,TIME) | m <sup>2</sup> /s <sup>5</sup> | Turbulent<br>dissipation rate,<br>second time<br>derivative | Domains 1–2 |             |
| spf.tau_vdxx | 2*spf.srijxx*(spf.mu+<br>spf.muT)                                                                                                                                                                                                                                                                                                        | Pa                             | Viscous stress<br>tensor, xx<br>component                   | Domains 1–2 | + operation |
| spf.tau_vdyx | 2*spf.srijyx*(spf.mu+<br>spf.muT)                                                                                                                                                                                                                                                                                                        | Pa                             | Viscous stress<br>tensor, yx<br>component                   | Domains 1–2 | + operation |
| spf.tau_vdzx | 2*spf.srijzx*(spf.mu+<br>spf.muT)                                                                                                                                                                                                                                                                                                        | Pa                             | Viscous stress<br>tensor, zx<br>component                   | Domains 1–2 | + operation |
| spf.tau_vdxy | 2*spf.srijxy*(spf.mu+<br>spf.muT)                                                                                                                                                                                                                                                                                                        | Pa                             | Viscous stress<br>tensor, xy<br>component                   | Domains 1–2 | + operation |
| spf.tau_vdyy | 2*spf.srijyy*(spf.mu+<br>spf.muT)                                                                                                                                                                                                                                                                                                        | Pa                             | Viscous stress<br>tensor, yy<br>component                   | Domains 1–2 | + operation |
| spf.tau_vdzy | 2*spf.srijzy*(spf.mu+<br>spf.muT)                                                                                                                                                                                                                                                                                                        | Pa                             | Viscous stress<br>tensor, zy<br>component                   | Domains 1–2 | + operation |
| spf.tau_vdxz | 2*spf.srijxz*(spf.mu+<br>spf.muT)                                                                                                                                                                                                                                                                                                        | Pa                             | Viscous stress<br>tensor, xz<br>component                   | Domains 1–2 | + operation |
| spf.tau_vdyz | 2*spf.srijyz*(spf.mu+<br>spf.muT)                                                                                                                                                                                                                                                                                                        | Pa                             | Viscous stress<br>tensor, yz                                | Domains 1–2 | + operation |

| Name                   | Expression                                                                                                                                                                                                                                                                                            | Unit                   | Description                         | Selection   | Details     |
|------------------------|-------------------------------------------------------------------------------------------------------------------------------------------------------------------------------------------------------------------------------------------------------------------------------------------------------|------------------------|-------------------------------------|-------------|-------------|
|                        |                                                                                                                                                                                                                                                                                                       |                        | component                           |             |             |
| spf.tau_vdzz           | $2 \cdot \text{spf.srijzz} \cdot (\text{spf.mu} + \text{spf.muT})$                                                                                                                                                                                                                                    | Pa                     | Viscous stress tensor, zz component | Domains 1–2 | + operation |
| spf.Qvd                | $\text{spf.tau\_vdx} \cdot u_x + \text{spf.tau\_vdy} \cdot u_y + \text{spf.tau\_vdxz} \cdot u_z + \text{spf.tau\_vdyx} \cdot v_x + \text{spf.tau\_vdy} \cdot v_y + \text{spf.tau\_vdyz} \cdot v_z + \text{spf.tau\_vdxz} \cdot w_x + \text{spf.tau\_vdyz} \cdot w_y + \text{spf.tau\_vdzz} \cdot w_z$ | W/m <sup>3</sup>       | Viscous dissipation                 | Domains 1–2 | + operation |
| spf.epsilon_p          | 1                                                                                                                                                                                                                                                                                                     | 1                      | Porosity                            | Domains 1–2 |             |
| spf.Fst_tensorxx       | 0                                                                                                                                                                                                                                                                                                     | N/m <sup>2</sup>       | Surface tension force, xx component | Domains 1–2 | + operation |
| spf.Fst_tensoryx       | 0                                                                                                                                                                                                                                                                                                     | N/m <sup>2</sup>       | Surface tension force, yx component | Domains 1–2 | + operation |
| spf.Fst_tensorzx       | 0                                                                                                                                                                                                                                                                                                     | N/m <sup>2</sup>       | Surface tension force, zx component | Domains 1–2 | + operation |
| spf.Fst_tensorxy       | 0                                                                                                                                                                                                                                                                                                     | N/m <sup>2</sup>       | Surface tension force, xy component | Domains 1–2 | + operation |
| spf.Fst_tensoryy       | 0                                                                                                                                                                                                                                                                                                     | N/m <sup>2</sup>       | Surface tension force, yy component | Domains 1–2 | + operation |
| spf.Fst_tensorzy       | 0                                                                                                                                                                                                                                                                                                     | N/m <sup>2</sup>       | Surface tension force, zy component | Domains 1–2 | + operation |
| spf.Fst_tensorxz       | 0                                                                                                                                                                                                                                                                                                     | N/m <sup>2</sup>       | Surface tension force, xz component | Domains 1–2 | + operation |
| spf.Fst_tensoryz       | 0                                                                                                                                                                                                                                                                                                     | N/m <sup>2</sup>       | Surface tension force, yz component | Domains 1–2 | + operation |
| spf.Fst_tensorzz       | 0                                                                                                                                                                                                                                                                                                     | N/m <sup>2</sup>       | Surface tension force, zz component | Domains 1–2 | + operation |
| spf.continuityEquation | $\text{spf.rho} \cdot \text{spf.divu}$                                                                                                                                                                                                                                                                | kg/(m <sup>3</sup> ·s) | Continuity equation                 | Domains 1–2 |             |
| spf.contCoeff          | spf.rho                                                                                                                                                                                                                                                                                               | kg/m <sup>3</sup>      | Help variable                       | Domains 1–2 |             |



| Name       | Expression                                                                                                                                                                                                                                                                                                                                                                                                                                                                                                                                                                                                                       | Unit              | Description                                  | Selection   | Details |
|------------|----------------------------------------------------------------------------------------------------------------------------------------------------------------------------------------------------------------------------------------------------------------------------------------------------------------------------------------------------------------------------------------------------------------------------------------------------------------------------------------------------------------------------------------------------------------------------------------------------------------------------------|-------------------|----------------------------------------------|-------------|---------|
| spf.lref   | 0.032587500000000005                                                                                                                                                                                                                                                                                                                                                                                                                                                                                                                                                                                                             | m                 | Reference length                             | Domains 1–2 |         |
| spf.res_k  | $\begin{aligned} & \text{spf.rho} * (\text{k2TIME} - \text{k2x} * \text{d}(\text{x}, \text{TIME}) - \text{k2y} * \text{d}(\text{y}, \text{TIME}) - \text{k2z} * \text{d}(\text{z}, \text{TIME})) - \\ & (\text{spf.mu} + \text{spf.muT} / \text{spf} \\ & \text{.sigmak}) * (\text{k2xx} + \text{k2yy} + \text{k2zz}) + \text{spf.rho} * \text{u} * \text{k2} \\ & \text{x} + \text{spf.rho} * \text{v} * \text{k2y} + \text{spf} \\ & \text{.rho} * \text{w} * \text{k2z} - \text{spf.linSCk} * \text{k2} - \text{spf.Pk} \end{aligned}$                                                                                        | W/m <sup>3</sup>  | Turbulent kinetic energy equation residual   | Domains 1–2 |         |
| spf.res_ep | $\begin{aligned} & \text{spf.rho} * (\text{ep2TIME} - \text{ep2x} * \text{d}(\text{x}, \text{TIME}) - \text{ep2y} * \text{d}(\text{y}, \text{TIME}) - \text{ep2z} * \text{d}(\text{z}, \text{TIME})) - \\ & (\text{spf.mu} + \text{spf.muT} / \text{spf} \\ & \text{.sigmaeps}) * (\text{ep2xx} + \text{ep2yy} + \text{ep2zz}) + \text{spf.rho} * \text{u} * \text{ep2x} + \text{spf.rho} * \text{v} * \text{ep2y} + \text{spf.rho} * \text{w} * \text{ep2z} - \text{spf.linSCeps} * \text{ep2} - \text{spf.Peps} \end{aligned}$                                                                                                 | Pa/s <sup>2</sup> | Turbulent dissipation rate equation residual | Domains 1–2 |         |
| spf.res_u  | $\begin{aligned} & \text{spf.rho} * (\text{uTIME} - \text{d}(\text{u}, \text{x}) * \text{d}(\text{x}, \text{TIME}) - \text{d}(\text{u}, \text{y}) * \text{d}(\text{y}, \text{TIME}) - \text{d}(\text{u}, \text{z}) * \text{d}(\text{z}, \text{TIME})) + \text{p2} \\ & \text{x} + \text{spf.rho} * \text{u} * \text{ux} + \text{spf.rho} * \text{v} * \text{uy} + \text{spf.rho} * \text{w} * \text{uz} - \\ & (\text{d}(2 * \text{ux}, \text{x}) + \text{d}(\text{uy} + \text{vx}, \text{y}) + \text{d}(\text{uz} + \text{wx}, \text{z})) * (\text{spf.mu} + \text{spf.muT}) - \text{spf.Fx} - \text{spf.Fgtotx} \end{aligned}$ | N/m <sup>3</sup>  | Equation residual                            | Domains 1–2 |         |
| spf.res_v  | $\begin{aligned} & \text{spf.rho} * (\text{vTIME} - \text{d}(\text{v}, \text{x}) * \text{d}(\text{x}, \text{TIME}) - \text{d}(\text{v}, \text{y}) * \text{d}(\text{y}, \text{TIME}) - \text{d}(\text{v}, \text{z}) * \text{d}(\text{z}, \text{TIME})) + \text{spf} \\ & \text{.rho} * \text{u} * \text{vx} + \text{p2y} + \text{spf.rho} * \text{v} * \text{vy} + \text{spf.rho} * \text{w} * \text{vz} - \\ & (\text{d}(\text{vx} + \text{uy}, \text{x}) + \text{d}(2 * \text{vy}, \text{y}) + \text{d}(\text{vz} + \text{wy}, \text{z})) * (\text{spf.mu} + \text{spf.muT}) - \text{spf.Fy} - \text{spf.Fgtoty} \end{aligned}$ | N/m <sup>3</sup>  | Equation residual                            | Domains 1–2 |         |
| spf.res_w  | spf.rho*(wTIME-                                                                                                                                                                                                                                                                                                                                                                                                                                                                                                                                                                                                                  | N/m <sup>3</sup>  | Equation residual                            | Domains 1–2 |         |

| Name      | Expression                                                                                                                                                                  | Unit                   | Description                | Selection   | Details |
|-----------|-----------------------------------------------------------------------------------------------------------------------------------------------------------------------------|------------------------|----------------------------|-------------|---------|
|           | $d(w,x)*d(x,TIME)-d(w,y)*d(y,TIME)-d(w,z)*d(z,TIME))+spf.f.rho*u*wx+spf.f.rho*v*wy+p2z+spf.f.rho*w*wz-(d(wx+uz,x)+d(wy+vz,y)+d(2*wz,z))*(spf.mu+spf.muT)-spf.Fz-spf.Fgtotz$ |                        |                            |             |         |
| spf.res_p | spf.rho*spf.divu                                                                                                                                                            | kg/(m <sup>3</sup> ·s) | Pressure equation residual | Domains 1–2 |         |

### Shape functions

| Name | Shape function    | Unit                           | Description                 | Shape frame | Selection   |
|------|-------------------|--------------------------------|-----------------------------|-------------|-------------|
| u    | Lagrange (Linear) | m/s                            | Velocity field, x component | Spatial     | Domains 1–2 |
| v    | Lagrange (Linear) | m/s                            | Velocity field, y component | Spatial     | Domains 1–2 |
| w    | Lagrange (Linear) | m/s                            | Velocity field, z component | Spatial     | Domains 1–2 |
| p2   | Lagrange (Linear) | Pa                             | Pressure                    | Spatial     | Domains 1–2 |
| k2   | Lagrange (Linear) | m <sup>2</sup> /s <sup>2</sup> | Turbulent kinetic energy    | Spatial     | Domains 1–2 |
| ep2  | Lagrange (Linear) | m <sup>2</sup> /s <sup>3</sup> | Turbulent dissipation rate  | Spatial     | Domains 1–2 |

### Weak expressions

| Weak expression                                                                                                                                                                                                                                                                          | Integration order | Integration frame | Selection   |
|------------------------------------------------------------------------------------------------------------------------------------------------------------------------------------------------------------------------------------------------------------------------------------------|-------------------|-------------------|-------------|
| $spf.f.rho*(-(uTIME-ux*d(x,TIME)-uy*d(y,TIME)-uz*d(z,TIME))*test(u)-(vTIME-vx*d(x,TIME)-vy*d(y,TIME)-vz*d(z,TIME))*test(v)-(wTIME-wx*d(x,TIME)-wy*d(y,TIME)-wz*d(z,TIME))*test(w))$                                                                                                      | 2                 | Spatial           | Domains 1–2 |
| $(p2-spf.K\_stress\_tensorxx)*test(ux)-spf.K\_stress\_tensorxy*test(uy)-spf.K\_stress\_tensorxz*test(uz)-spf.K\_stress\_tensoryx*test(vx)+(p2-spf.K\_stress\_tensoryy)*test(vy)-spf.K\_stress\_tensoryz*test(vz)-spf.K\_stress\_tensorzx*test(wx)-spf.K\_stress\_tensorzy*test(wy)+(p2-$ | 2                 | Spatial           | Domains 1–2 |

| Weak expression                                                                                                                                                                                                                                                      | Integration order | Integration frame | Selection   |
|----------------------------------------------------------------------------------------------------------------------------------------------------------------------------------------------------------------------------------------------------------------------|-------------------|-------------------|-------------|
| spf.K_stress_tensorzz)*test(wz)                                                                                                                                                                                                                                      |                   |                   |             |
| spf.Fx*test(u)+spf.Fy*test(v)+spf.Fz*test(w)                                                                                                                                                                                                                         | 2                 | Spatial           | Domains 1–2 |
| spf.rho*(-<br>(d(u,x)*u+d(u,y)*v+d(u,z)*w)*test(u)-<br>(d(v,x)*u+d(v,y)*v+d(v,z)*w)*test(v)-<br>(d(w,x)*u+d(w,y)*v+d(w,z)*w)*test(w))                                                                                                                                | 2                 | Spatial           | Domains 1–2 |
| -spf.continuityEquation*test(p2)                                                                                                                                                                                                                                     | 2                 | Spatial           | Domains 1–2 |
| -<br>test(k2x)*(spf.mu+spf.muT/spf.sigma)<br>ak)*k2x-<br>test(k2y)*(spf.mu+spf.muT/spf.sigma)<br>ak)*k2y-<br>test(k2z)*(spf.mu+spf.muT/spf.sigma)<br>ak)*k2z-<br>spf.rho*(u*k2x+v*k2y+w*k2z)*test(k2)+<br>spf.Pk*test(k2)+spf.linSCk*k2*test(k2)                     | 2                 | Spatial           | Domains 1–2 |
| -spf.rho*(k2TIME-k2x*d(x,TIME)-<br>k2y*d(y,TIME)-<br>k2z*d(z,TIME))*test(k2)                                                                                                                                                                                         | 2                 | Spatial           | Domains 1–2 |
| -(k2-<br>nojac(k2))*(spf.usePseudoTimeStepping>0)*<br>spf.rho*spf.tsti*test(k2)                                                                                                                                                                                      | 2                 | Spatial           | Domains 1–2 |
| -<br>test(ep2x)*(spf.mu+spf.muT/spf.sigma)<br>eps)*ep2x-<br>test(ep2y)*(spf.mu+spf.muT/spf.sigma)<br>eps)*ep2y-<br>test(ep2z)*(spf.mu+spf.muT/spf.sigma)<br>eps)*ep2z-<br>spf.rho*(u*ep2x+v*ep2y+w*ep2z)*test(ep2)+<br>spf.Peps*test(ep2)+spf.linSCeps*ep2*test(ep2) | 2                 | Spatial           | Domains 1–2 |
| -spf.rho*(ep2TIME-ep2x*d(x,TIME)-<br>ep2y*d(y,TIME)-<br>ep2z*d(z,TIME))*test(ep2)                                                                                                                                                                                    | 2                 | Spatial           | Domains 1–2 |
| -(ep2-<br>nojac(ep2))*(spf.usePseudoTimeStepping>0)*<br>spf.rho*spf.tsti*test(ep2)                                                                                                                                                                                   | 2                 | Spatial           | Domains 1–2 |
| -spf.crosswindep-spf.crosswindk                                                                                                                                                                                                                                      | 2                 | Spatial           | Domains 1–2 |
| spf.streamlinek                                                                                                                                                                                                                                                      | 2                 | Spatial           | Domains 1–2 |

| Weak expression                                                                                                  | Integration order | Integration frame | Selection   |
|------------------------------------------------------------------------------------------------------------------|-------------------|-------------------|-------------|
| spf.streamlineep                                                                                                 | 2                 | Spatial           | Domains 1–2 |
| spf.streamlinens                                                                                                 | 2                 | Spatial           | Domains 1–2 |
| spf.crosswindns                                                                                                  | 2                 | Spatial           | Domains 1–2 |
| (spf.usePseudoTimeStepping>0)*spf.rho*spf.tsti*(-(u-nojac(u))*test(u)-(v-nojac(v))*test(v)-(w-nojac(w))*test(w)) | 2                 | Spatial           | Domains 1–2 |

2.4.4 Initial Values 1

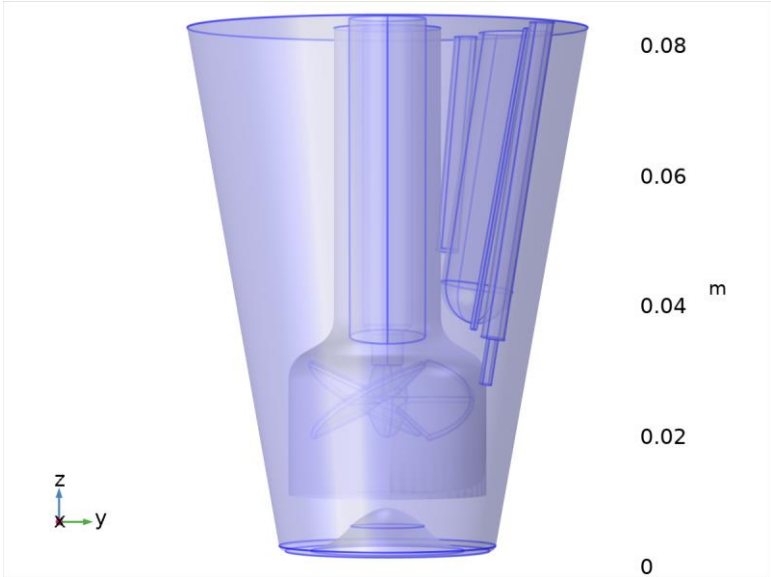

Initial Values 1

SELECTION

|                        |                                          |
|------------------------|------------------------------------------|
| Geometric entity level | Domain                                   |
| Selection              | Geometry geom1: Dimension 3: All domains |

EQUATIONS

$$\begin{aligned} \rho_{\text{init}} &= \rho + \rho_{\text{hydro}} \\ \rho_{\text{hydro}} &= \rho_{\text{ref}} \mathbf{g} \cdot (\mathbf{r} - \mathbf{r}_{\text{ref}}) \end{aligned}$$

Initial values

SETTINGS

| Description                 | Value |
|-----------------------------|-------|
| Velocity field, x component | 0     |
| Velocity field, y component | 0     |
| Velocity field, z component | 0     |

| Description                         | Value      |
|-------------------------------------|------------|
| Pressure                            | 0          |
| Compensate for hydrostatic pressure | On         |
| Turbulent kinetic energy            | spf.kinit  |
| Turbulent dissipation rate          | spf.epinit |

## Coordinate system selection

### SETTINGS

| Description       | Value                    |
|-------------------|--------------------------|
| Coordinate system | Global coordinate system |

## Variables

| Name        | Expression  | Unit                           | Description                 | Selection   |
|-------------|-------------|--------------------------------|-----------------------------|-------------|
| spf.u_initx | 0           | m/s                            | Velocity field, x component | Domains 1–2 |
| spf.u_inity | 0           | m/s                            | Velocity field, y component | Domains 1–2 |
| spf.u_initz | 0           | m/s                            | Velocity field, z component | Domains 1–2 |
| spf.p_init  | spf.p_hydro | Pa                             | Pressure                    | Domains 1–2 |
| spf.k_init  | spf.kinit   | m <sup>2</sup> /s <sup>2</sup> | Turbulent kinetic energy    | Domains 1–2 |
| spf.ep_init | spf.epinit  | m <sup>2</sup> /s <sup>3</sup> | Turbulent dissipation rate  | Domains 1–2 |

## 2.4.5 Wall 1

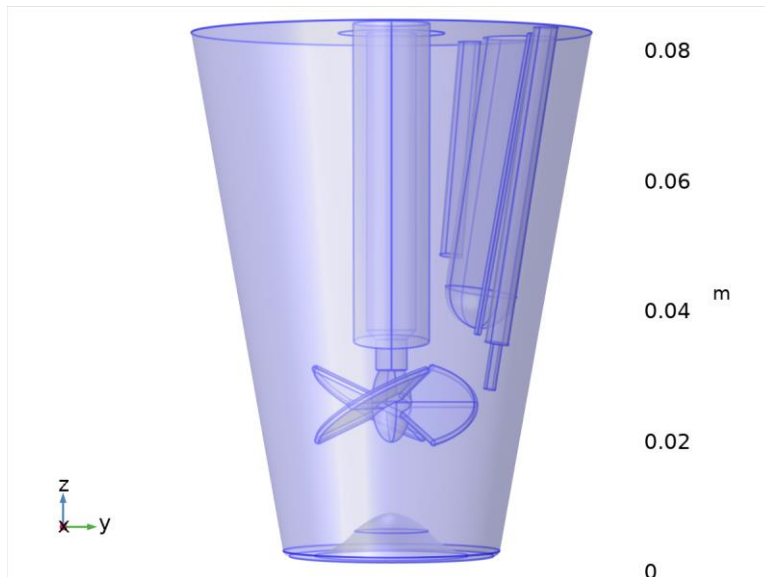

### Wall 1

#### SELECTION

|                        |          |
|------------------------|----------|
| Geometric entity level | Boundary |
|------------------------|----------|

|           |                                             |
|-----------|---------------------------------------------|
| Selection | Geometry geom1: Dimension 2: All boundaries |
|-----------|---------------------------------------------|

## EQUATIONS

$$\mathbf{u} \cdot \mathbf{n} = \mathbf{u}_{tr} \cdot \mathbf{n}$$

$$\mathbf{Kn} = -\rho \frac{u_{\tau}}{u_{+}} \mathbf{u}_{rel, tang}$$

$$\mathbf{u}_{rel} = \mathbf{u} - \mathbf{u}_{tr}, \quad \mathbf{u}_{rel, tang} = \mathbf{u}_{rel} - (\mathbf{u}_{rel} \cdot \mathbf{n})\mathbf{n}$$

$$\nabla k_2 \cdot \mathbf{n} = 0, \quad \epsilon = \rho \frac{C_{\mu} k_2^2}{\kappa_v \delta_w^+ \mu}$$

## Boundary condition

### SETTINGS

| Description          | Value   |
|----------------------|---------|
| Wall condition       | No slip |
| Apply wall roughness | Off     |

## Wall movement

### SETTINGS

| Description            | Value                |
|------------------------|----------------------|
| Translational velocity | Automatic from frame |
| Sliding wall           | Off                  |

## Variables

| Name      | Expression       | Unit                           | Description                           | Selection                      | Details |
|-----------|------------------|--------------------------------|---------------------------------------|--------------------------------|---------|
| spf.hasWF | 1                |                                | Help variable                         | Boundaries 1–11, 13–40, 42–114 |         |
| spf.k_nn  | max(k2,0)        | m <sup>2</sup> /s <sup>2</sup> | Regularized turbulent kinetic energy  | Boundaries 1–11, 13–40, 42–114 |         |
| spf.ubndx | spf.utrx+spf.usx | m/s                            | Velocity at boundary, x component     | Boundaries 1–11, 13–40, 42–114 |         |
| spf.ubndy | spf.utry+spf.usy | m/s                            | Velocity at boundary, y component     | Boundaries 1–11, 13–40, 42–114 |         |
| spf.ubndz | spf.utrz+spf.usz | m/s                            | Velocity at boundary, z component     | Boundaries 1–11, 13–40, 42–114 |         |
| spf.usx   | 0                | m/s                            | Velocity of sliding wall, x component | Boundaries 1–11, 13–40, 42–114 |         |

| Name           | Expression                                                      | Unit | Description                           | Selection                      | Details     |
|----------------|-----------------------------------------------------------------|------|---------------------------------------|--------------------------------|-------------|
| spf.usy        | 0                                                               | m/s  | Velocity of sliding wall, y component | Boundaries 1–11, 13–40, 42–114 |             |
| spf.usz        | 0                                                               | m/s  | Velocity of sliding wall, z component | Boundaries 1–11, 13–40, 42–114 |             |
| spf.utrx       | d(x,TIME)                                                       | m/s  | Velocity of moving wall, x component  | Boundaries 42–114              |             |
| spf.utory      | d(y,TIME)                                                       | m/s  | Velocity of moving wall, y component  | Boundaries 42–114              |             |
| spf.utrz       | d(z,TIME)                                                       | m/s  | Velocity of moving wall, z component  | Boundaries 42–114              |             |
| spf.utrx       | 0                                                               | m/s  | Velocity of moving wall, x component  | Boundaries 1–11, 13–40         |             |
| spf.utory      | 0                                                               | m/s  | Velocity of moving wall, y component  | Boundaries 1–11, 13–40         |             |
| spf.utrz       | 0                                                               | m/s  | Velocity of moving wall, z component  | Boundaries 1–11, 13–40         |             |
| spf.uLeakagex  | 0                                                               | m/s  | Leakage velocity, x component         | Boundaries 1–11, 13–40, 42–114 | + operation |
| spf.uLeakagey  | 0                                                               | m/s  | Leakage velocity, y component         | Boundaries 1–11, 13–40, 42–114 | + operation |
| spf.uLeakagez  | 0                                                               | m/s  | Leakage velocity, z component         | Boundaries 1–11, 13–40, 42–114 | + operation |
| spf.noSlipWall | 1                                                               | 1    | Help variable                         | Boundaries 1–11, 13–40, 42–114 |             |
| spf.un_here    | u*nojac(spfxmesh)+<br>v*nojac(spfnymesh)+<br>w*nojac(spfnzmesh) | m/s  | Intermediate variable                 | Boundaries 1–11, 13–40, 42–114 |             |
| spf.u_herex    | spf.un_here*nojac(spfxmesh)                                     | m/s  | Intermediate variable, x component    | Boundaries 1–11, 13–40, 42–114 |             |
| spf.u_herey    | spf.un_here*nojac(spfnymesh)                                    | m/s  | Intermediate                          | Boundaries 1–                  |             |

| Name                 | Expression                                                                                                                    | Unit             | Description                         | Selection                      | Details |
|----------------------|-------------------------------------------------------------------------------------------------------------------------------|------------------|-------------------------------------|--------------------------------|---------|
|                      | nymesh)                                                                                                                       |                  | variable, y component               | 11, 13–40, 42–114              |         |
| spf.u_herez          | spf.un_here*nojac(spfnzmesh)                                                                                                  | m/s              | Intermediate variable, z component  | Boundaries 1–11, 13–40, 42–114 |         |
| spf.un_there         | (spf.ubndx+spf.uLeakage)*nojac(spfnxmesh)+(spf.ubndy+spf.uLeakage)*nojac(spfnymesh)+(spf.ubndz+spf.uLeakage)*nojac(spfnzmesh) | m/s              | Intermediate variable               | Boundaries 1–11, 13–40, 42–114 |         |
| spf.u_there_x        | spf.un_there*nojac(spfnxmesh)                                                                                                 | m/s              | Intermediate variable, x component  | Boundaries 1–11, 13–40, 42–114 |         |
| spf.u_there_y        | spf.un_there*nojac(spfnymesh)                                                                                                 | m/s              | Intermediate variable, y component  | Boundaries 1–11, 13–40, 42–114 |         |
| spf.u_there_z        | spf.un_there*nojac(spfnzmesh)                                                                                                 | m/s              | Intermediate variable, z component  | Boundaries 1–11, 13–40, 42–114 |         |
| spf.unJump           | spf.un_here-spfn.un_there                                                                                                     | m/s              | Jump in normal velocity             | Boundaries 1–11, 13–40, 42–114 |         |
| spf.KStressn_avx     | spf.K_stress_tensorxx*spf.nxmesh+spf.K_stress_tensorxy*spf.nymesh+spf.K_stress_tensorxz*spf.nzmesh                            | N/m <sup>2</sup> | Average viscous stress, x component | Boundaries 1–11, 13–40, 42–114 |         |
| spf.KStressn_avy     | spf.K_stress_tensoryx*spf.nxmesh+spf.K_stress_tensoryy*spf.nymesh+spf.K_stress_tensoryz*spf.nzmesh                            | N/m <sup>2</sup> | Average viscous stress, y component | Boundaries 1–11, 13–40, 42–114 |         |
| spf.KStressn_avz     | spf.K_stress_tensorzx*spf.nxmesh+spf.K_stress_tensorzy*spf.nymesh+spf.K_stress_tenzorz*spf.nzmesh                             | N/m <sup>2</sup> | Average viscous stress, z component | Boundaries 1–11, 13–40, 42–114 |         |
| spf.KStressTestn_avx | spf.K_stress_tensor_testxx*spf.nxmesh+spf.K_stress_tensor_testxy*spf.nymesh+spf.K_stress_tensor_testxz*spf                    | N/m <sup>2</sup> | Average viscous stress, x component | Boundaries 1–11, 13–40, 42–114 |         |



| Name                 | Expression                                                                                                        | Unit              | Description                         | Selection                      | Details |
|----------------------|-------------------------------------------------------------------------------------------------------------------|-------------------|-------------------------------------|--------------------------------|---------|
|                      | .nzmesh                                                                                                           |                   |                                     |                                |         |
| spf.KStressTestn_avy | spf.K_stress_tensor_testyx*spf.nxmesh+spf.K_stress_tensor_testyy*spf.nymesh+spf.K_stress_tensor_testyz*spf.nzmesh | N/m <sup>2</sup>  | Average viscous stress, y component | Boundaries 1–11, 13–40, 42–114 |         |
| spf.KStressTestn_avz | spf.K_stress_tensor_testzx*spf.nxmesh+spf.K_stress_tensor_testzy*spf.nymesh+spf.K_stress_tensor_testzz*spf.nzmesh | N/m <sup>2</sup>  | Average viscous stress, z component | Boundaries 1–11, 13–40, 42–114 |         |
| spf.ujumpx           | spf.u_herex-spf.u_there                                                                                           | m/s               | Velocity jump, x component          | Boundaries 1–11, 13–40, 42–114 |         |
| spf.ujumpy           | spf.u_herey-spf.u_therey                                                                                          | m/s               | Velocity jump, y component          | Boundaries 1–11, 13–40, 42–114 |         |
| spf.ujumpz           | spf.u_herez-spf.u_therez                                                                                          | m/s               | Velocity jump, z component          | Boundaries 1–11, 13–40, 42–114 |         |
| spf.contCoeffFace    | down(spf.contCoeff)                                                                                               | kg/m <sup>3</sup> | Help variable                       | Boundaries 1–11, 13–40, 42–114 |         |
| spf.rhoFace          | down(spf.rho)                                                                                                     | kg/m <sup>3</sup> | Density face value                  | Boundaries 1–11, 13–40, 42–114 |         |
| spf.c_here           | 36*nojac(down(spf.mu+spf.muT)/down(1))*spf.meshVol/spf.meshVolInt                                                 | Pa·s/m            | Intermediate variable               | Boundaries 1–11, 13–40, 42–114 |         |
| spf.meshVol          | meshvol_spatial                                                                                                   | m <sup>2</sup>    |                                     | Boundaries 1–11, 13–40, 42–114 |         |
| spf.meshVolInt       | down(meshvol_spatial)                                                                                             | m <sup>3</sup>    | Volume of interior mesh element     | Boundaries 1–11, 13–40, 42–114 |         |
| spf.sigma_dg_ns      | 4*spf.c_here                                                                                                      | Pa·s/m            |                                     | Boundaries 1–11, 13–40, 42–114 |         |
| spf.umxTnFace        | (spf.upwind_helpx*spf.nxmesh+spf.upwind_helpy*spf.nymesh+sp                                                       | m/s               | Relative velocity on face           | Boundaries 1–11, 13–40, 42–    |         |

| Name           | Expression                                                                                                                              | Unit                                                  | Description                                                | Selection                              | Details     |
|----------------|-----------------------------------------------------------------------------------------------------------------------------------------|-------------------------------------------------------|------------------------------------------------------------|----------------------------------------|-------------|
|                | f.upwind_helpz*spf.nz<br>mesh<0)*(spf.upwind<br>_helpx*spf.nxmesh+s<br>pf.upwind_helpy*spf.<br>nymesh+spf.upwind_<br>helpz*spf.nzmesh)  |                                                       |                                                            | 114                                    |             |
| spf.upwind_ns  | spf.rhoFace*spf.umxT<br>nFace*spf.unJump*tes<br>t(spfp.un_here)/down(1<br>)^2                                                           | W/m <sup>2</sup>                                      | Upwind term                                                | Boundaries 1–<br>11, 13–40, 42–<br>114 |             |
| spf.upwindCont | spf.contCoeffFace*spf<br>.unJump*test(p2)                                                                                               | kg <sup>2</sup> /(m <sup>3</sup> .s<br><sup>3</sup> ) | Upwind term for<br>continuity<br>equation                  | Boundaries 1–<br>11, 13–40, 42–<br>114 |             |
| spf.pFace      | p2                                                                                                                                      | Pa                                                    | Pressure face<br>value                                     | Boundaries 1–<br>11, 13–40, 42–<br>114 |             |
| spf.consFlux   | -<br>spf.pFace*test(spfp.un_<br>here)                                                                                                   | W/m <sup>2</sup>                                      | Conservative flux                                          | Boundaries 1–<br>11, 13–40, 42–<br>114 | + operation |
| spf.d_w_plus   | nojac(max(11.06,0.5*s<br>pf.mixLParam^0.25*s<br>qrt(spfp.k_nn)*down(sp<br>f.rho))/(down(spfp.mu)*<br>down(tremetric_spati<br>al)^0.5))) | 1                                                     | Wall lift-off in<br>viscous units                          | Boundaries 1–<br>11, 13–40, 42–<br>114 |             |
| spf.uPlus      | log(spfp.d_w_plus)/spf.<br>kappav+spf.B                                                                                                 | 1                                                     | Tangential<br>velocity in<br>viscous units                 | Boundaries 1–<br>11, 13–40, 42–<br>114 | + operation |
| spf.mixLParam  | spf.C_mu                                                                                                                                | 1                                                     | Intermediate<br>variable                                   | Boundaries 1–<br>11, 13–40, 42–<br>114 |             |
| spf.ep_w       | spf.mixLParam*spf.k_<br>nn^2*nojac(down(spfp<br>.rho))/(spf.kappav*spf.<br>d_w_plus*nojac(down<br>(spfp.mu)))                           | m <sup>2</sup> /s <sup>3</sup>                        | Turbulent<br>dissipation rate,<br>(wall adjacent<br>cells) | Boundaries 1–<br>11, 13–40, 42–<br>114 |             |
| spf.u_tau      | nojac(max(spfp.mixLPa<br>ram^0.25*sqrt(spfp.k_n<br>n),sqrt(spfp.u_tangx^2<br>+spfp.u_tangy^2+spfp.u<br>_tangz^2+eps)/spf.uP<br>lus))    | m/s                                                   | Friction velocity                                          | Boundaries 1–<br>11, 13–40, 42–<br>114 |             |
| spf.u_tangx    | u-spfp.ubndx-<br>spfp.nxmesh*((u-                                                                                                       | m/s                                                   | Velocity field, x<br>component                             | Boundaries 1–<br>11, 13–40, 42–        |             |

| Name                 | Expression                                                                                                                      | Unit | Description                             | Selection                              | Details |
|----------------------|---------------------------------------------------------------------------------------------------------------------------------|------|-----------------------------------------|----------------------------------------|---------|
|                      | spf.ubndx)*spf.nxmesh<br>h+(v-<br>spf.ubndy)*spf.nymes<br>h+(w-<br>spf.ubndz)*spf.nzmesh<br>h)                                  |      |                                         | 114                                    |         |
| spf.u_tangy          | v-spf.ubndy-<br>spf.nymesh*((u-<br>spf.ubndx)*spf.nxmeh<br>h+(v-<br>spf.ubndy)*spf.nymes<br>h+(w-<br>spf.ubndz)*spf.nzmeh<br>h) | m/s  | Velocity field, y<br>component          | Boundaries 1–<br>11, 13–40, 42–<br>114 |         |
| spf.u_tangz          | w-spf.ubndz-<br>spf.nzmeh*((u-<br>spf.ubndx)*spf.nxmeh<br>h+(v-<br>spf.ubndy)*spf.nymes<br>h+(w-<br>spf.ubndz)*spf.nzmeh<br>h)  | m/s  | Velocity field, z<br>component          | Boundaries 1–<br>11, 13–40, 42–<br>114 |         |
| spf.delta_w          | spf.d_w_plus*down(sp<br>f.mu)/(down(sp.f.rho)*<br>max(sp.f.u_tau,sqrt(ep<br>s)))                                                | m    | Wall lift-off                           | Boundaries 1–<br>11, 13–40, 42–<br>114 |         |
| spf.uStar            | spf.u_tau                                                                                                                       | m/s  | Friction velocity                       | Boundaries 1–<br>11, 13–40, 42–<br>114 |         |
| spf.Delta_wPlus      | spf.d_w_plus                                                                                                                    | 1    | Wall resolution<br>in viscous units     | Boundaries 1–<br>11, 13–40, 42–<br>114 |         |
| spf.WRHeightExp<br>r | -11.06+spf.d_w_plus                                                                                                             | 1    | Wall resolution<br>height<br>expression | Boundaries 1–<br>11, 13–40, 42–<br>114 |         |

### Weak expressions

| Weak expression                                                                                                                                                                                                                                                            | Integration order | Integration frame | Selection                              |
|----------------------------------------------------------------------------------------------------------------------------------------------------------------------------------------------------------------------------------------------------------------------------|-------------------|-------------------|----------------------------------------|
| spf.KStressn_avx*test(sp.f.u_herex)+spf.<br>.KStressn_avy*test(sp.f.u_herey)+spf.KS<br>tressn_avz*test(sp.f.u_herez)+spf.KStre<br>ssTestn_avx*spf.ujumpx+spf.KStressTe<br>stn_avy*spf.ujumpy+spf.KStressTestn_<br>avz*spf.ujumpz-<br>spf.sigma_dg_ns*spf.unJump*test(sp.f. | 2                 | Spatial           | Boundaries 1–<br>11, 13–40, 42–<br>114 |

| Weak expression                                                                                              | Integration order | Integration frame | Selection                              |
|--------------------------------------------------------------------------------------------------------------|-------------------|-------------------|----------------------------------------|
| un_here)+spf.upwind_ns+spf.upwind<br>Cont+spf.consFlux                                                       |                   |                   |                                        |
| down(spf.rho)*spf.u_tau*(-<br>spf.u_tangx*test(u)-<br>spf.u_tangy*test(v)-<br>spf.u_tangz*test(w))/spf.uPlus | 2                 | Spatial           | Boundaries 1–<br>11, 13–40, 42–<br>114 |

## Constraints

| Constraint    | Constraint force | Shape function    | Selection                          | Details   |
|---------------|------------------|-------------------|------------------------------------|-----------|
| -ep2+spf.ep_w | test(-ep2)       | Lagrange (Linear) | Boundaries 1–11, 13–<br>40, 42–114 | Elemental |

## 2.4.6 Gravity 1

### SELECTION

|                        |              |
|------------------------|--------------|
| Geometric entity level | Entire model |
|------------------------|--------------|

### EQUATIONS

$$\rho(\mathbf{u} \cdot \nabla)\mathbf{u} = \nabla \cdot [-p\mathbf{I} + \mathbf{K}] + \mathbf{F} + \rho\mathbf{g}$$

## Acceleration of gravity

### SETTINGS

| Description                          | Value    |
|--------------------------------------|----------|
| Acceleration of gravity, x component | 0        |
| Acceleration of gravity, y component | 0        |
| Acceleration of gravity, z component | -g_const |
| Include buoyancy-induced turbulence  | Off      |

## Variables

| Name       | Expression | Unit             | Description                          | Selection   | Details     |
|------------|------------|------------------|--------------------------------------|-------------|-------------|
| spf.Fgtotx | spf.Fgx    | N/m <sup>3</sup> | Gravity force, x component           | Domains 1–2 | + operation |
| spf.Fgtoty | spf.Fgy    | N/m <sup>3</sup> | Gravity force, y component           | Domains 1–2 | + operation |
| spf.Fgtotz | spf.Fgz    | N/m <sup>3</sup> | Gravity force, z component           | Domains 1–2 | + operation |
| spf.gx     | 0          | m/s <sup>2</sup> | Acceleration of gravity, x component | Global      |             |
| spf.gy     | 0          | m/s <sup>2</sup> | Acceleration of                      | Global      |             |

| Name            | Expression                                                                  | Unit                   | Description                          | Selection   | Details     |
|-----------------|-----------------------------------------------------------------------------|------------------------|--------------------------------------|-------------|-------------|
|                 |                                                                             |                        | gravity, y component                 |             |             |
| spf.gz          | -g_const                                                                    | m/s <sup>2</sup>       | Acceleration of gravity, z component | Global      |             |
| spf.Fgx         | spf.rho*spf.gx                                                              | N/m <sup>3</sup>       | Gravity force, x component           | Domains 1–2 |             |
| spf.Fgy         | spf.rho*spf.gy                                                              | N/m <sup>3</sup>       | Gravity force, y component           | Domains 1–2 |             |
| spf.Fgz         | spf.rho*spf.gz                                                              | N/m <sup>3</sup>       | Gravity force, z component           | Domains 1–2 |             |
| spf.Pkbmph_mul  | 0                                                                           | kg/(m <sup>3</sup> ·s) |                                      | Domains 1–2 | + operation |
| spf.Pepbmph_mul | 0                                                                           | kg/(m <sup>3</sup> ·s) |                                      | Domains 1–2 | + operation |
| spf.p_hydro     | spf.rhoref*(spf.gx*(x-spf.rrefx)+spf.gy*(y-spf.rrefy)+spf.gz*(z-spf.rrefz)) | Pa                     | Hydrostatic pressure                 | Domains 1–2 |             |

#### Weak expressions

| Weak expression                                 | Integration order | Integration frame | Selection   |
|-------------------------------------------------|-------------------|-------------------|-------------|
| spf.Fgx*test(u)+spf.Fgy*test(v)+spf.Fgz*test(w) | 2                 | Spatial           | Domains 1–2 |

## 2.4.7 Flow Continuity 1

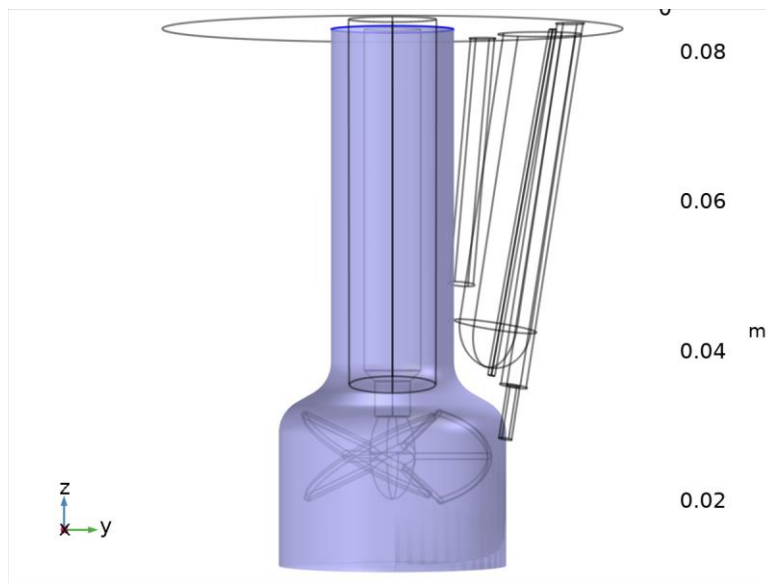

Flow Continuity 1

### SELECTION

|                        |                                             |
|------------------------|---------------------------------------------|
| Geometric entity level | Boundary                                    |
| Selection              | Geometry geom1: Dimension 2: All boundaries |

### EQUATIONS

$$\begin{aligned} \underline{u}_{src} &= \underline{u}_{dst}, \quad p2_{src} = p2_{dst} \\ k2_{src} &= k2_{dst}, \quad \epsilon_{src} = \epsilon_{dst} \end{aligned}$$

### Pair selection

#### SETTINGS

| Description | Value                           |
|-------------|---------------------------------|
| Pairs       | Identity Boundary Pair 3a (ap3) |

### Variables

| Name             | Expression    | Unit              | Description                 | Selection   | Details |
|------------------|---------------|-------------------|-----------------------------|-------------|---------|
| spf.mu_here_ap3  | down(spf.mu)  | Pa-s              | Dynamic viscosity           | Boundary 12 |         |
| spf.mu_here_ap3  | down(spf.mu)  | Pa-s              | Dynamic viscosity           | Boundary 41 |         |
| spf.muT_here_ap3 | spf.muT       | Pa-s              | Turbulent dynamic viscosity | Boundary 12 |         |
| spf.muT_here_ap3 | spf.muT       | Pa-s              | Turbulent dynamic viscosity | Boundary 41 |         |
| spf.rho_here_ap3 | down(spf.rho) | kg/m <sup>3</sup> | Density                     | Boundary 12 |         |
| spf.rho_here_ap3 | down(spf.rho) | kg/m <sup>3</sup> | Density                     | Boundary 41 |         |

| Name                   | Expression                    | Unit              | Description                        | Selection   | Details |
|------------------------|-------------------------------|-------------------|------------------------------------|-------------|---------|
| spf.rho_there_ap3      | src2dst_ap3(spf.rho_here_ap3) | kg/m <sup>3</sup> | Density                            | Boundary 41 |         |
| spf.rho_there_ap3      | dst2src_ap3(spf.rho_here_ap3) | kg/m <sup>3</sup> | Density                            | Boundary 12 |         |
| spf.contCoeff_here_ap3 | down(spf.contCoeff)           | kg/m <sup>3</sup> | Help variable                      | Boundary 12 |         |
| spf.contCoeff_here_ap3 | down(spf.contCoeff)           | kg/m <sup>3</sup> | Help variable                      | Boundary 41 |         |
| spf.meshVolInt_ap3     | down(meshvol_spatial)         | m <sup>3</sup>    | Volume of interior mesh element    | Boundary 12 |         |
| spf.meshVolInt_ap3     | down(meshvol_spatial)         | m <sup>3</sup>    | Volume of interior mesh element    | Boundary 41 |         |
| spf.meshVol_ap3        | meshvol_spatial               | m <sup>2</sup>    |                                    | Boundary 12 |         |
| spf.meshVol_ap3        | meshvol_spatial               | m <sup>2</sup>    |                                    | Boundary 41 |         |
| spf.u_here_ap3x        | u                             | m/s               | Intermediate variable, x component | Boundary 12 |         |
| spf.u_here_ap3y        | v                             | m/s               | Intermediate variable, y component | Boundary 12 |         |
| spf.u_here_ap3z        | w                             | m/s               | Intermediate variable, z component | Boundary 12 |         |
| spf.u_here_ap3x        | u                             | m/s               | Intermediate variable, x component | Boundary 41 |         |
| spf.u_here_ap3y        | v                             | m/s               | Intermediate variable, y component | Boundary 41 |         |
| spf.u_here_ap3z        | w                             | m/s               | Intermediate variable, z component | Boundary 41 |         |
| spf.u_there_ap3x       | src2dst_ap3(u)                | m/s               | Intermediate variable, x component | Boundary 41 |         |
| spf.u_there_ap3y       | src2dst_ap3(v)                | m/s               | Intermediate variable, y component | Boundary 41 |         |
| spf.u_there_ap3z       | src2dst_ap3(w)                | m/s               | Intermediate variable, z           | Boundary 41 |         |

| Name                   | Expression                                                                                             | Unit             | Description                         | Selection   | Details |
|------------------------|--------------------------------------------------------------------------------------------------------|------------------|-------------------------------------|-------------|---------|
|                        |                                                                                                        |                  | component                           |             |         |
| spf.u_there_ap3x       | dst2src_ap3(u)                                                                                         | m/s              | Intermediate variable, x component  | Boundary 12 |         |
| spf.u_there_ap3y       | dst2src_ap3(v)                                                                                         | m/s              | Intermediate variable, y component  | Boundary 12 |         |
| spf.u_there_ap3z       | dst2src_ap3(w)                                                                                         | m/s              | Intermediate variable, z component  | Boundary 12 |         |
| spf.p_here_ap3         | p2                                                                                                     | Pa               | Pressure                            | Boundary 12 |         |
| spf.p_here_ap3         | p2                                                                                                     | Pa               | Pressure                            | Boundary 41 |         |
| spf.KStressn_here_ap3x | spf.K_stress_tensorxx*<br>spf.nxmesh+spf.K_stress_tensorxy*spf.nymesh+spf.K_stress_tensorxz*spf.nzmesh | N/m <sup>2</sup> | Average viscous stress, x component | Boundary 12 |         |
| spf.KStressn_here_ap3y | spf.K_stress_tensorxy*<br>spf.nxmesh+spf.K_stress_tensoryy*spf.nymesh+spf.K_stress_tensoryz*spf.nzmesh | N/m <sup>2</sup> | Average viscous stress, y component | Boundary 12 |         |
| spf.KStressn_here_ap3z | spf.K_stress_tensorxz*<br>spf.nxmesh+spf.K_stress_tensorzy*spf.nymesh+spf.K_stress_tensorzz*spf.nzmesh | N/m <sup>2</sup> | Average viscous stress, z component | Boundary 12 |         |
| spf.KStressn_here_ap3x | spf.K_stress_tensorxx*<br>spf.nxmesh+spf.K_stress_tensorxy*spf.nymesh+spf.K_stress_tensorxz*spf.nzmesh | N/m <sup>2</sup> | Average viscous stress, x component | Boundary 41 |         |
| spf.KStressn_here_ap3y | spf.K_stress_tensorxy*<br>spf.nxmesh+spf.K_stress_tensoryy*spf.nymesh+spf.K_stress_tensoryz*spf.nzmesh | N/m <sup>2</sup> | Average viscous stress, y component | Boundary 41 |         |
| spf.KStressn_here_ap3z | spf.K_stress_tensorxz*<br>spf.nxmesh+spf.K_stress_tensorzy*spf.nymesh+spf.K_stress_tensorzz*spf.nzmesh | N/m <sup>2</sup> | Average viscous stress, z component | Boundary 41 |         |
| spf.KStressn_there     | src2dst_ap3(spf.K_stress_tensorxx)*spf.nx                                                              | N/m <sup>2</sup> | Average viscous stress, x           | Boundary 41 |         |



| Name                        | Expression                                                                                                                                                          | Unit             | Description                               | Selection   | Details |
|-----------------------------|---------------------------------------------------------------------------------------------------------------------------------------------------------------------|------------------|-------------------------------------------|-------------|---------|
| _ap3x                       | mesh+src2dst_ap3(sp<br>f.K_stress_tensorxy)*s<br>pf.nymesh+src2dst_a<br>p3(sp.f.K_stress_tenso<br>rxz)*spf.nzmesh                                                   |                  | component                                 |             |         |
| spf.KStressn_there<br>_ap3y | src2dst_ap3(sp.f.K_str<br>ess_tensorxy)*spf.nx<br>mesh+src2dst_ap3(sp<br>f.K_stress_tensoryy)*s<br>pf.nymesh+src2dst_a<br>p3(sp.f.K_stress_tenso<br>ryz)*spf.nzmesh | N/m <sup>2</sup> | Average viscous<br>stress, y<br>component | Boundary 41 |         |
| spf.KStressn_there<br>_ap3z | src2dst_ap3(sp.f.K_str<br>ess_tensorxz)*spf.nx<br>mesh+src2dst_ap3(sp<br>f.K_stress_tensorzy)*s<br>pf.nymesh+src2dst_a<br>p3(sp.f.K_stress_tenso<br>rzz)*spf.nzmesh | N/m <sup>2</sup> | Average viscous<br>stress, z<br>component | Boundary 41 |         |
| spf.KStressn_there<br>_ap3x | dst2src_ap3(sp.f.K_str<br>ess_tensorxx)*spf.nx<br>mesh+dst2src_ap3(sp<br>f.K_stress_tensorxy)*s<br>pf.nymesh+dst2src_a<br>p3(sp.f.K_stress_tenso<br>rxz)*spf.nzmesh | N/m <sup>2</sup> | Average viscous<br>stress, x<br>component | Boundary 12 |         |
| spf.KStressn_there<br>_ap3y | dst2src_ap3(sp.f.K_str<br>ess_tensorxy)*spf.nx<br>mesh+dst2src_ap3(sp<br>f.K_stress_tensoryy)*s<br>pf.nymesh+dst2src_a<br>p3(sp.f.K_stress_tenso<br>ryz)*spf.nzmesh | N/m <sup>2</sup> | Average viscous<br>stress, y<br>component | Boundary 12 |         |
| spf.KStressn_there<br>_ap3z | dst2src_ap3(sp.f.K_str<br>ess_tensorxz)*spf.nx<br>mesh+dst2src_ap3(sp<br>f.K_stress_tensorzy)*s<br>pf.nymesh+dst2src_a<br>p3(sp.f.K_stress_tenso<br>rzz)*spf.nzmesh | N/m <sup>2</sup> | Average viscous<br>stress, z<br>component | Boundary 12 |         |
| spf.KStressn_av_ap<br>3x    | 0.5*(spf.KStressn_her<br>e_ap3x+spf.KStressn_<br>there_ap3x)                                                                                                        | N/m <sup>2</sup> | Average viscous<br>stress, x<br>component | Boundary 12 |         |
| spf.KStressn_av_ap<br>3y    | 0.5*(spf.KStressn_her<br>e_ap3y+spf.KStressn_<br>there_ap3y)                                                                                                        | N/m <sup>2</sup> | Average viscous<br>stress, y<br>component | Boundary 12 |         |

| Name                 | Expression                                                                                                                                                 | Unit              | Description                         | Selection   | Details |
|----------------------|------------------------------------------------------------------------------------------------------------------------------------------------------------|-------------------|-------------------------------------|-------------|---------|
|                      | there_ap3y)                                                                                                                                                |                   | component                           |             |         |
| spf.KStressn_av_ap3z | $0.5 * (\text{spf.KStressn\_here\_ap3z} + \text{spf.KStressn\_there\_ap3z})$                                                                               | N/m <sup>2</sup>  | Average viscous stress, z component | Boundary 12 |         |
| spf.KStressn_av_ap3x | $0.5 * (\text{spf.KStressn\_here\_ap3x} + \text{spf.KStressn\_there\_ap3x})$                                                                               | N/m <sup>2</sup>  | Average viscous stress, x component | Boundary 41 |         |
| spf.KStressn_av_ap3y | $0.5 * (\text{spf.KStressn\_here\_ap3y} + \text{spf.KStressn\_there\_ap3y})$                                                                               | N/m <sup>2</sup>  | Average viscous stress, y component | Boundary 41 |         |
| spf.KStressn_av_ap3z | $0.5 * (\text{spf.KStressn\_here\_ap3z} + \text{spf.KStressn\_there\_ap3z})$                                                                               | N/m <sup>2</sup>  | Average viscous stress, z component | Boundary 41 |         |
| spf.ujump_ap3x       | $\text{spf.u\_here\_ap3x} - \text{spf.u\_there\_ap3x}$                                                                                                     | m/s               | Velocity jump, x component          | Boundary 12 |         |
| spf.ujump_ap3y       | $\text{spf.u\_here\_ap3y} - \text{spf.u\_there\_ap3y}$                                                                                                     | m/s               | Velocity jump, y component          | Boundary 12 |         |
| spf.ujump_ap3z       | $\text{spf.u\_here\_ap3z} - \text{spf.u\_there\_ap3z}$                                                                                                     | m/s               | Velocity jump, z component          | Boundary 12 |         |
| spf.ujump_ap3x       | $\text{spf.u\_here\_ap3x} - \text{spf.u\_there\_ap3x}$                                                                                                     | m/s               | Velocity jump, x component          | Boundary 41 |         |
| spf.ujump_ap3y       | $\text{spf.u\_here\_ap3y} - \text{spf.u\_there\_ap3y}$                                                                                                     | m/s               | Velocity jump, y component          | Boundary 41 |         |
| spf.ujump_ap3z       | $\text{spf.u\_here\_ap3z} - \text{spf.u\_there\_ap3z}$                                                                                                     | m/s               | Velocity jump, z component          | Boundary 41 |         |
| spf.c_here_ap3       | $36 * \text{nojac}((\text{spf.mu\_here\_ap3} + \text{spf.muT\_here\_ap3}) / \text{spf.epsilon\_p}) * \text{spf.meshVol\_ap3} / \text{spf.meshVolInt\_ap3}$ | Pa-s/m            |                                     | Boundary 12 |         |
| spf.c_here_ap3       | $36 * \text{nojac}((\text{spf.mu\_here\_ap3} + \text{spf.muT\_here\_ap3}) / \text{spf.epsilon\_p}) * \text{spf.meshVol\_ap3} / \text{spf.meshVolInt\_ap3}$ | Pa-s/m            |                                     | Boundary 41 |         |
| spf.sigma_dg_ns_ap3  | $\text{spf.c\_here\_ap3} + \text{dst2src\_ap3}(\text{spf.c\_here\_ap3})$                                                                                   | Pa-s/m            |                                     | Boundary 12 |         |
| spf.sigma_dg_ns_ap3  | $\text{spf.c\_here\_ap3} + \text{src2dst\_ap3}(\text{spf.c\_here\_ap3})$                                                                                   | Pa-s/m            |                                     | Boundary 41 |         |
| spf.rhoFace_ap3      | $0.5 * (\text{spf.rho\_here\_ap3})$                                                                                                                        | kg/m <sup>3</sup> | Density face                        | Boundary 12 |         |

| Name                  | Expression                                                                                                                 | Unit              | Description               | Selection   | Details |
|-----------------------|----------------------------------------------------------------------------------------------------------------------------|-------------------|---------------------------|-------------|---------|
|                       | +spf.rho_there_ap3)                                                                                                        |                   | value                     |             |         |
| spf.rhoFace_ap3       | 0.5*(spf.rho_here_ap3+spf.rho_there_ap3)                                                                                   | kg/m <sup>3</sup> | Density face value        | Boundary 41 |         |
| spf.rhoJump_ap3       | spf.rho_here_ap3-spfrho_there_ap3                                                                                          | kg/m <sup>3</sup> | Density face value        | Boundary 12 |         |
| spf.rhoJump_ap3       | spf.rho_here_ap3-spfrho_there_ap3                                                                                          | kg/m <sup>3</sup> | Density face value        | Boundary 41 |         |
| spf.contCoeffFace_ap3 | 0.5*(spf.contCoeff_here_ap3+dst2src_ap3(spf.contCoeff_here_ap3))                                                           | kg/m <sup>3</sup> | Help variable             | Boundary 12 |         |
| spf.contCoeffFace_ap3 | 0.5*(spf.contCoeff_here_ap3+src2dst_ap3(spf.contCoeff_here_ap3))                                                           | kg/m <sup>3</sup> | Help variable             | Boundary 41 |         |
| spf.umxTnFace_ap3     | 0.5*(spf.umxTn_here_ap3+spf.umxTn_there_ap3<0)*(spf.umxTn_here_ap3+spf.umxTn_there_ap3)                                    | m/s               | Relative velocity on face | Boundary 12 |         |
| spf.umxTnFace_ap3     | 0.5*(spf.umxTn_here_ap3+spf.umxTn_there_ap3<0)*(spf.umxTn_here_ap3+spf.umxTn_there_ap3)                                    | m/s               | Relative velocity on face | Boundary 41 |         |
| spf.umxTn_here_ap3    | spf.upwind_helpx*spf.nxmesh+spf.upwind_helpy*spf.nymesh+spf.upwind_helpz*spf.nzmesh                                        | m/s               | Relative velocity on face | Boundary 12 |         |
| spf.umxTn_here_ap3    | spf.upwind_helpx*spf.nxmesh+spf.upwind_helpy*spf.nymesh+spf.upwind_helpz*spf.nzmesh                                        | m/s               | Relative velocity on face | Boundary 41 |         |
| spf.umxTn_there_ap3   | dst2src_ap3(spf.upwind_helpx)*spf.nxmesh+dst2src_ap3(spf.upwind_helpy)*spf.nymesh+dst2src_ap3(spf.upwind_helpz)*spf.nzmesh | m/s               | Relative velocity on face | Boundary 12 |         |
| spf.umxTn_there_ap3   | src2dst_ap3(spf.upwind_helpx)*spf.nxmes                                                                                    | m/s               | Relative velocity on face | Boundary 41 |         |

| Name               | Expression                                                                                                                                                                                                                                                                          | Unit                                               | Description                         | Selection   | Details |
|--------------------|-------------------------------------------------------------------------------------------------------------------------------------------------------------------------------------------------------------------------------------------------------------------------------------|----------------------------------------------------|-------------------------------------|-------------|---------|
|                    | $h + \text{src2dst\_ap3}(\text{spf.upwind\_helpy}) * \text{spf.nymesh} + \text{src2dst\_ap3}(\text{spf.upwind\_helpz}) * \text{spf.nzmesh}$                                                                                                                                         |                                                    |                                     |             |         |
| spf.upwind_ns_ap3  | $\text{spf.rhoFace\_ap3} * \text{spf.umxTnFace\_ap3} * (\text{spf.ujump\_ap3} * \text{test}(\text{spf.u\_here\_ap3x}) + \text{spf.ujump\_ap3y} * \text{test}(\text{spf.u\_here\_ap3y}) + \text{spf.ujump\_ap3z} * \text{test}(\text{spf.u\_here\_ap3z})) / \text{spf.epsilon\_p}^2$ | W/m <sup>2</sup>                                   | Upwind term                         | Boundary 12 |         |
| spf.upwind_ns_ap3  | $\text{spf.rhoFace\_ap3} * \text{spf.umxTnFace\_ap3} * (\text{spf.ujump\_ap3} * \text{test}(\text{spf.u\_here\_ap3x}) + \text{spf.ujump\_ap3y} * \text{test}(\text{spf.u\_here\_ap3y}) + \text{spf.ujump\_ap3z} * \text{test}(\text{spf.u\_here\_ap3z})) / \text{spf.epsilon\_p}^2$ | W/m <sup>2</sup>                                   | Upwind term                         | Boundary 41 |         |
| spf.upwindCont_ap3 | $0.5 * \text{spf.contCoeffFace\_ap3} * (\text{spf.ujump\_ap3x} * \text{spf.nxmesh} + \text{spf.ujump\_ap3y} * \text{spf.nymesh} + \text{spf.ujump\_ap3z} * \text{spf.nzmesh}) * \text{test}(\text{spf.p\_here\_ap3})$                                                               | kg <sup>2</sup> /(m <sup>3</sup> ·s <sup>3</sup> ) | Upwind term for continuity equation | Boundary 12 |         |
| spf.upwindCont_ap3 | $0.5 * \text{spf.contCoeffFace\_ap3} * (\text{spf.ujump\_ap3x} * \text{spf.nxmesh} + \text{spf.ujump\_ap3y} * \text{spf.nymesh} + \text{spf.ujump\_ap3z} * \text{spf.nzmesh}) * \text{test}(\text{spf.p\_here\_ap3})$                                                               | kg <sup>2</sup> /(m <sup>3</sup> ·s <sup>3</sup> ) | Upwind term for continuity equation | Boundary 41 |         |
| spf.p_there_ap3    | $\text{dst2src\_ap3}(p2)$                                                                                                                                                                                                                                                           | Pa                                                 | Pressure                            | Boundary 12 |         |
| spf.p_there_ap3    | $\text{src2dst\_ap3}(p2)$                                                                                                                                                                                                                                                           | Pa                                                 | Pressure                            | Boundary 41 |         |
| spf.pJump_ap3      | $\text{spf.p\_here\_ap3} - \text{spf.p\_there\_ap3}$                                                                                                                                                                                                                                | Pa                                                 | Pressure jump                       | Boundary 12 |         |
| spf.pJump_ap3      | $\text{spf.p\_here\_ap3} - \text{spf.p\_there\_ap3}$                                                                                                                                                                                                                                | Pa                                                 | Pressure jump                       | Boundary 41 |         |
| spf.pFace_ap3      | $0.5 * (\text{spf.p\_here\_ap3} +$                                                                                                                                                                                                                                                  | Pa                                                 | Pressure face                       | Boundary 12 |         |

| Name                      | Expression                                                                                                                                  | Unit                           | Description            | Selection   | Details     |
|---------------------------|---------------------------------------------------------------------------------------------------------------------------------------------|--------------------------------|------------------------|-------------|-------------|
|                           | spf.p_there_ap3)                                                                                                                            |                                | value                  |             |             |
| spf.pFace_ap3             | 0.5*(spf.p_here_ap3+<br>spf.p_there_ap3)                                                                                                    | Pa                             | Pressure face<br>value | Boundary 41 |             |
| spf.consFlux_ap3          | -<br>spf.pFace_ap3*(test(s<br>pf.u_here_ap3x)*spf.n<br>xmesh+test(spf.u_her<br>e_ap3y)*spf.nymesh+<br>test(spf.u_here_ap3z)<br>*spf.nzmesh) | W/m <sup>2</sup>               | Conservative flux      | Boundary 12 | + operation |
| spf.consFlux_ap3          | -<br>spf.pFace_ap3*(test(s<br>pf.u_here_ap3x)*spf.n<br>xmesh+test(spf.u_her<br>e_ap3y)*spf.nymesh+<br>test(spf.u_here_ap3z)<br>*spf.nzmesh) | W/m <sup>2</sup>               | Conservative flux      | Boundary 41 | + operation |
| spf.kjump_ap3             | k2-dst2src_ap3(k2)                                                                                                                          | m <sup>2</sup> /s <sup>2</sup> |                        | Boundary 12 |             |
| spf.kjump_ap3             | k2-src2dst_ap3(k2)                                                                                                                          | m <sup>2</sup> /s <sup>2</sup> |                        | Boundary 41 |             |
| spf.Dk_ap3                | spf.mu_here_ap3+spf<br>.muT_here_ap3/spf.si<br>gmak                                                                                         | Pa·s                           |                        | Boundary 12 |             |
| spf.Dk_ap3                | spf.mu_here_ap3+spf<br>.muT_here_ap3/spf.si<br>gmak                                                                                         | Pa·s                           |                        | Boundary 41 |             |
| spf.gammak_here_<br>ap3x  | spf.Dk_ap3*k2x                                                                                                                              | W/m <sup>2</sup>               |                        | Boundary 12 |             |
| spf.gammak_here_<br>ap3y  | spf.Dk_ap3*k2y                                                                                                                              | W/m <sup>2</sup>               |                        | Boundary 12 |             |
| spf.gammak_here_<br>ap3z  | spf.Dk_ap3*k2z                                                                                                                              | W/m <sup>2</sup>               |                        | Boundary 12 |             |
| spf.gammak_here_<br>ap3x  | spf.Dk_ap3*k2x                                                                                                                              | W/m <sup>2</sup>               |                        | Boundary 41 |             |
| spf.gammak_here_<br>ap3y  | spf.Dk_ap3*k2y                                                                                                                              | W/m <sup>2</sup>               |                        | Boundary 41 |             |
| spf.gammak_here_<br>ap3z  | spf.Dk_ap3*k2z                                                                                                                              | W/m <sup>2</sup>               |                        | Boundary 41 |             |
| spf.gammak_there_<br>ap3x | src2dst_ap3(spf.Dk_a<br>p3*k2x)                                                                                                             | W/m <sup>2</sup>               |                        | Boundary 41 |             |
| spf.gammak_there_<br>ap3y | src2dst_ap3(spf.Dk_a<br>p3*k2y)                                                                                                             | W/m <sup>2</sup>               |                        | Boundary 41 |             |
| spf.gammak_there          | src2dst_ap3(spf.Dk_a                                                                                                                        | W/m <sup>2</sup>               |                        | Boundary 41 |             |

| Name                    | Expression                                                                                                                                                                             | Unit                              | Description | Selection   | Details |
|-------------------------|----------------------------------------------------------------------------------------------------------------------------------------------------------------------------------------|-----------------------------------|-------------|-------------|---------|
| _ap3z                   | p3*k2z)                                                                                                                                                                                |                                   |             |             |         |
| spf.gammak_there_ap3x   | dst2src_ap3(spf.Dk_ap3*k2x)                                                                                                                                                            | W/m <sup>2</sup>                  |             | Boundary 12 |         |
| spf.gammak_there_ap3y   | dst2src_ap3(spf.Dk_ap3*k2y)                                                                                                                                                            | W/m <sup>2</sup>                  |             | Boundary 12 |         |
| spf.gammak_there_ap3z   | dst2src_ap3(spf.Dk_ap3*k2z)                                                                                                                                                            | W/m <sup>2</sup>                  |             | Boundary 12 |         |
| spf.gammakn_av_ap3      | 0.5*((spf.gammak_here_ap3x+spf.gammak_there_ap3x)*spf.nxmesh+(spf.gammak_here_ap3y+spf.gammak_there_ap3y)*spf.nymesh+(spf.gammak_here_ap3z+spf.gammak_there_ap3z)*spf.nzmesh)*test(k2) | kg·m <sup>2</sup> /s <sup>5</sup> |             | Boundary 12 |         |
| spf.gammakn_av_ap3      | 0.5*((spf.gammak_here_ap3x+spf.gammak_there_ap3x)*spf.nxmesh+(spf.gammak_here_ap3y+spf.gammak_there_ap3y)*spf.nymesh+(spf.gammak_here_ap3z+spf.gammak_there_ap3z)*spf.nzmesh)*test(k2) | kg·m <sup>2</sup> /s <sup>5</sup> |             | Boundary 41 |         |
| spf.gammakn_av_test_ap3 | 0.5*spf.Dk_ap3*(test(k2x)*spf.nxmesh+test(k2y)*spf.nymesh+test(k2z)*spf.nzmesh)*spf.kjump_ap3                                                                                          | kg·m <sup>2</sup> /s <sup>5</sup> |             | Boundary 12 |         |
| spf.gammakn_av_test_ap3 | 0.5*spf.Dk_ap3*(test(k2x)*spf.nxmesh+test(k2y)*spf.nymesh+test(k2z)*spf.nzmesh)*spf.kjump_ap3                                                                                          | kg·m <sup>2</sup> /s <sup>5</sup> |             | Boundary 41 |         |
| spf.c_here_k_ap3        | 18*nojac(spf.Dk_ap3)*spf.meshVol_ap3/spf.meshVolInt_ap3                                                                                                                                | Pa·s/m                            |             | Boundary 12 |         |
| spf.c_here_k_ap3        | 18*nojac(spf.Dk_ap3)*spf.meshVol_ap3/spf.meshVolInt_ap3                                                                                                                                | Pa·s/m                            |             | Boundary 41 |         |
| spf.sigma_dg_k_ap       | spf.c_here_k_ap3+dst                                                                                                                                                                   | Pa·s/m                            |             | Boundary 12 |         |

| Name                       | Expression                                               | Unit                              | Description | Selection   | Details |
|----------------------------|----------------------------------------------------------|-----------------------------------|-------------|-------------|---------|
| 3                          | 2src_ap3(spf.c_here_k_ap3)                               |                                   |             |             |         |
| spf.sigma_dg_k_ap3         | spf.c_here_k_ap3+src2dst_ap3(spf.c_here_k_ap3)           | Pa·s/m                            |             | Boundary 41 |         |
| spf.upwind_k_ap3           | spf.rhoFace_ap3*spf.umxTnFace_ap3*spf.kjump_ap3*test(k2) | kg·m <sup>2</sup> /s <sup>5</sup> | Upwind term | Boundary 12 |         |
| spf.upwind_k_ap3           | spf.rhoFace_ap3*spf.umxTnFace_ap3*spf.kjump_ap3*test(k2) | kg·m <sup>2</sup> /s <sup>5</sup> | Upwind term | Boundary 41 |         |
| spf.epjump_ap3             | ep2-dst2src_ap3(ep2)                                     | m <sup>2</sup> /s <sup>2</sup>    |             | Boundary 12 |         |
| spf.epjump_ap3             | ep2-src2dst_ap3(ep2)                                     | m <sup>2</sup> /s <sup>2</sup>    |             | Boundary 41 |         |
| spf.Dep_ap3                | spf.mu_here_ap3+spf.muT_here_ap3/spf.sigmaeps            | Pa·s                              |             | Boundary 12 |         |
| spf.Dep_ap3                | spf.mu_here_ap3+spf.muT_here_ap3/spf.sigmaeps            | Pa·s                              |             | Boundary 41 |         |
| spf.gammaep_here_ap3x      | spf.Dep_ap3*ep2x                                         | kg/s <sup>4</sup>                 |             | Boundary 12 |         |
| spf.gammaep_here_ap3y      | spf.Dep_ap3*ep2y                                         | kg/s <sup>4</sup>                 |             | Boundary 12 |         |
| spf.gammaep_here_ap3z      | spf.Dep_ap3*ep2z                                         | kg/s <sup>4</sup>                 |             | Boundary 12 |         |
| spf.gammaep_here_ap3x      | spf.Dep_ap3*ep2x                                         | kg/s <sup>4</sup>                 |             | Boundary 41 |         |
| spf.gammaep_here_ap3y      | spf.Dep_ap3*ep2y                                         | kg/s <sup>4</sup>                 |             | Boundary 41 |         |
| spf.gammaep_here_ap3z      | spf.Dep_ap3*ep2z                                         | kg/s <sup>4</sup>                 |             | Boundary 41 |         |
| spf.gammaep_ther_here_ap3x | src2dst_ap3(spf.Dep_ap3*ep2x)                            | kg/s <sup>4</sup>                 |             | Boundary 41 |         |
| spf.gammaep_ther_here_ap3y | src2dst_ap3(spf.Dep_ap3*ep2y)                            | kg/s <sup>4</sup>                 |             | Boundary 41 |         |
| spf.gammaep_ther_here_ap3z | src2dst_ap3(spf.Dep_ap3*ep2z)                            | kg/s <sup>4</sup>                 |             | Boundary 41 |         |
| spf.gammaep_ther_here_ap3x | dst2src_ap3(spf.Dep_ap3*ep2x)                            | kg/s <sup>4</sup>                 |             | Boundary 12 |         |
| spf.gammaep_ther_here_ap3y | dst2src_ap3(spf.Dep_ap3*ep2y)                            | kg/s <sup>4</sup>                 |             | Boundary 12 |         |

| Name                         | Expression                                                                                                                                                                                                                            | Unit                              | Description | Selection   | Details |
|------------------------------|---------------------------------------------------------------------------------------------------------------------------------------------------------------------------------------------------------------------------------------|-----------------------------------|-------------|-------------|---------|
| spf.gammaep_ther<br>e_ap3z   | dst2src_ap3(spf.Dep_<br>ap3*ep2z)                                                                                                                                                                                                     | kg/s <sup>4</sup>                 |             | Boundary 12 |         |
| spf.gammaepn_av<br>_ap3      | 0.5*((spf.gammaep_h<br>ere_ap3x+spf.gamma<br>ep_there_ap3x)*spf.n<br>xmesh+(spf.gammae<br>p_here_ap3y+spf.ga<br>mmaep_there_ap3y)*<br>spf.nymesh+(spf.gam<br>maep_here_ap3z+spf<br>.gammaep_there_ap3<br>z)*spf.nzmesh)*test(e<br>p2) | kg·m <sup>2</sup> /s <sup>7</sup> |             | Boundary 12 |         |
| spf.gammaepn_av<br>_ap3      | 0.5*((spf.gammaep_h<br>ere_ap3x+spf.gamma<br>ep_there_ap3x)*spf.n<br>xmesh+(spf.gammae<br>p_here_ap3y+spf.ga<br>mmaep_there_ap3y)*<br>spf.nymesh+(spf.gam<br>maep_here_ap3z+spf<br>.gammaep_there_ap3<br>z)*spf.nzmesh)*test(e<br>p2) | kg·m <sup>2</sup> /s <sup>7</sup> |             | Boundary 41 |         |
| spf.gammaepn_av<br>_test_ap3 | 0.5*spf.Dep_ap3*(test<br>(ep2x)*spf.nxmesh+t<br>est(ep2y)*spf.nymesh<br>+test(ep2z)*spf.nzme<br>sh)*spf.epjump_ap3                                                                                                                    | kg·m <sup>2</sup> /s <sup>6</sup> |             | Boundary 12 |         |
| spf.gammaepn_av<br>_test_ap3 | 0.5*spf.Dep_ap3*(test<br>(ep2x)*spf.nxmesh+t<br>est(ep2y)*spf.nymesh<br>+test(ep2z)*spf.nzme<br>sh)*spf.epjump_ap3                                                                                                                    | kg·m <sup>2</sup> /s <sup>6</sup> |             | Boundary 41 |         |
| spf.c_here_ep_ap3            | 18*nojac(spf.Dep_ap<br>3)*spf.meshVol_ap3/s<br>pf.meshVolInt_ap3                                                                                                                                                                      | Pa·s/m                            |             | Boundary 12 |         |
| spf.c_here_ep_ap3            | 18*nojac(spf.Dep_ap<br>3)*spf.meshVol_ap3/s<br>pf.meshVolInt_ap3                                                                                                                                                                      | Pa·s/m                            |             | Boundary 41 |         |
| spf.sigma_dg_ep_a<br>p3      | spf.c_here_ep_ap3+d<br>st2src_ap3(spf.c_here<br>_ep_ap3)                                                                                                                                                                              | Pa·s/m                            |             | Boundary 12 |         |
| spf.sigma_dg_ep_a<br>p3      | spf.c_here_ep_ap3+sr<br>c2dst_ap3(spf.c_here_                                                                                                                                                                                         | Pa·s/m                            |             | Boundary 41 |         |



| Name              | Expression                                                 | Unit                              | Description | Selection   | Details |
|-------------------|------------------------------------------------------------|-----------------------------------|-------------|-------------|---------|
|                   | ep_ap3)                                                    |                                   |             |             |         |
| spf.upwind_ep_ap3 | spf.rhoFace_ap3*spf.umxTnFace_ap3*spf.epjump_ap3*test(ep2) | kg·m <sup>2</sup> /s <sup>6</sup> | Upwind term | Boundary 12 |         |
| spf.upwind_ep_ap3 | spf.rhoFace_ap3*spf.umxTnFace_ap3*spf.epjump_ap3*test(ep2) | kg·m <sup>2</sup> /s <sup>6</sup> | Upwind term | Boundary 41 |         |

### Weak expressions

| Weak expression                                                                                                                                                                                                                                                                                                                                                                                                                    | Integration order | Integration frame | Selection   |
|------------------------------------------------------------------------------------------------------------------------------------------------------------------------------------------------------------------------------------------------------------------------------------------------------------------------------------------------------------------------------------------------------------------------------------|-------------------|-------------------|-------------|
| if(incontact_ap3,spf.KStressn_av_ap3x*test(spf.u_here_ap3x)+spf.KStressn_av_ap3y*test(spf.u_here_ap3y)+spf.KStressn_av_ap3z*test(spf.u_here_ap3z),0)                                                                                                                                                                                                                                                                               | 6                 | Spatial           | Boundary 12 |
| if(incontact_ap3,0.5*((spf.K_stress_tensor_testxx*spf.nxmesh+spf.K_stress_tensor_testxy*spf.nymesh+spf.K_stress_tensor_testxz*spf.nzmesh)*spf.ujump_ap3x+(spf.K_stress_tensor_testyx*spf.nxmesh+spf.K_stress_tensor_testyy*spf.nymesh+spf.K_stress_tensor_testyz*spf.nzmesh)*spf.ujump_ap3y+(spf.K_stress_tensor_testzx*spf.nxmesh+spf.K_stress_tensor_testzy*spf.nymesh+spf.K_stress_tensor_testzz*spf.nzmesh)*spf.ujump_ap3z),0) | 6                 | Spatial           | Boundary 12 |
| if(incontact_ap3,spf.sigma_dg_ns_ap3*(-spf.ujump_ap3x*test(spf.u_here_ap3x)-spf.ujump_ap3y*test(spf.u_here_ap3y)-spf.ujump_ap3z*test(spf.u_here_ap3z)),0)                                                                                                                                                                                                                                                                          | 6                 | Spatial           | Boundary 12 |
| if(incontact_ap3,spf.upwind_ns_ap3+spf.upwindCont_ap3+spf.consFlux_ap3,0)                                                                                                                                                                                                                                                                                                                                                          | 6                 | Spatial           | Boundary 12 |
| if(incontact_ap3,spf.KStressn_av_ap3x*test(spf.u_here_ap3x)+spf.KStressn_av_ap3y*test(spf.u_here_ap3y)+spf.KStressn_av_ap3z*test(spf.u_here_ap3z),0)                                                                                                                                                                                                                                                                               | 6                 | Spatial           | Boundary 41 |
| if(incontact_ap3,0.5*((spf.K_stress_te                                                                                                                                                                                                                                                                                                                                                                                             | 6                 | Spatial           | Boundary 41 |

| Weak expression                                                                                                                                                                                                                                                                                                                                                                              | Integration order | Integration frame | Selection   |
|----------------------------------------------------------------------------------------------------------------------------------------------------------------------------------------------------------------------------------------------------------------------------------------------------------------------------------------------------------------------------------------------|-------------------|-------------------|-------------|
| nsor_testxx*spf.nxmesh+spf.K_stress_tensor_testxy*spf.nymesh+spf.K_stress_tensor_testxz*spf.nzmesh)*spf.ujump_ap3x+(spf.K_stress_tensor_testyx*spf.nxmesh+spf.K_stress_tensor_testyy*spf.nymesh+spf.K_stress_tensor_testyz*spf.nzmesh)*spf.ujump_ap3y+(spf.K_stress_tensor_testzx*spf.nxmesh+spf.K_stress_tensor_testzy*spf.nymesh+spf.K_stress_tensor_testzz*spf.nzmesh)*spf.ujump_ap3z),0) |                   |                   |             |
| if(incontact_ap3,spf.sigma_dg_ns_ap3*(-spf.ujump_ap3x*test(spf.u_here_ap3x)-spf.ujump_ap3y*test(spf.u_here_ap3y)-spf.ujump_ap3z*test(spf.u_here_ap3z)),0)                                                                                                                                                                                                                                    | 6                 | Spatial           | Boundary 41 |
| if(incontact_ap3,spf.upwind_ns_ap3+spf.upwindCont_ap3+spf.consFlux_ap3,0)                                                                                                                                                                                                                                                                                                                    | 6                 | Spatial           | Boundary 41 |
| if(incontact_ap3,spf.gammakn_av_ap3+spf.gammakn_av_test_ap3-spf.sigma_dg_k_ap3*spf.kjump_ap3*test(k2)+spf.upwind_k_ap3,0)                                                                                                                                                                                                                                                                    | 6                 | Spatial           | Boundary 12 |
| if(incontact_ap3,spf.gammakn_av_ap3+spf.gammakn_av_test_ap3-spf.sigma_dg_k_ap3*spf.kjump_ap3*test(k2)+spf.upwind_k_ap3,0)                                                                                                                                                                                                                                                                    | 6                 | Spatial           | Boundary 41 |
| if(incontact_ap3,spf.gammaepn_av_ap3+spf.gammaepn_av_test_ap3-spf.sigma_dg_ep_ap3*spf.epjump_ap3*test(ep2)+spf.upwind_ep_ap3,0)                                                                                                                                                                                                                                                              | 6                 | Spatial           | Boundary 12 |
| if(incontact_ap3,spf.gammaepn_av_ap3+spf.gammaepn_av_test_ap3-spf.sigma_dg_ep_ap3*spf.epjump_ap3*test(ep2)+spf.upwind_ep_ap3,0)                                                                                                                                                                                                                                                              | 6                 | Spatial           | Boundary 41 |

## Wall 1

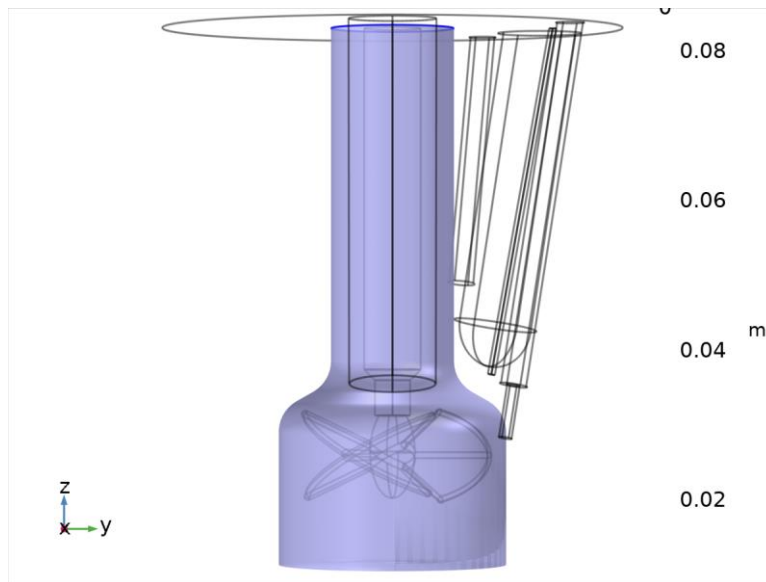

## Wall 1

### SELECTION

|                        |                                             |
|------------------------|---------------------------------------------|
| Geometric entity level | Boundary                                    |
| Selection              | Geometry geom1: Dimension 2: All boundaries |

### EQUATIONS

$$\mathbf{u} \cdot \mathbf{n} = \mathbf{u}_{tr} \cdot \mathbf{n}$$

$$\mathbf{K}\mathbf{n} = -\rho \frac{u_{\tau}}{u_{+}} \mathbf{u}_{rel, tang}$$

$$\mathbf{u}_{rel} = \mathbf{u} - \mathbf{u}_{tr}, \quad \mathbf{u}_{rel, tang} = \mathbf{u}_{rel} - (\mathbf{u}_{rel} \cdot \mathbf{n})\mathbf{n}$$

$$\nabla k_2 \cdot \mathbf{n} = 0, \quad \epsilon = \rho \frac{C_{\mu} k_2^2}{\kappa_v \delta_w^+ \mu}$$

## Boundary condition

### SETTINGS

| Description          | Value   |
|----------------------|---------|
| Wall condition       | No slip |
| Apply wall roughness | Off     |

## Wall movement

### SETTINGS

| Description            | Value                |
|------------------------|----------------------|
| Translational velocity | Automatic from frame |
| Sliding wall           | Off                  |

## Variables

| Name      | Expression                            | Unit                           | Description                           | Selection   | Details |
|-----------|---------------------------------------|--------------------------------|---------------------------------------|-------------|---------|
| spf.hasWF | if(!incontact_ap3,1,0)                |                                | Help variable                         | Boundary 41 |         |
| spf.hasWF | if(!incontact_ap3,1,0)                |                                | Help variable                         | Boundary 12 |         |
| spf.k_nn  | if(!incontact_ap3,max(k2,0),0)        | m <sup>2</sup> /s <sup>2</sup> | Regularized turbulent kinetic energy  | Boundary 41 |         |
| spf.k_nn  | if(!incontact_ap3,max(k2,0),0)        | m <sup>2</sup> /s <sup>2</sup> | Regularized turbulent kinetic energy  | Boundary 12 |         |
| spf.ubndx | if(!incontact_ap3,spf.utrx+spf.usx,0) | m/s                            | Velocity at boundary, x component     | Boundary 41 |         |
| spf.ubndy | if(!incontact_ap3,spf.uty+spf.usy,0)  | m/s                            | Velocity at boundary, y component     | Boundary 41 |         |
| spf.ubndz | if(!incontact_ap3,spf.utz+spf.usz,0)  | m/s                            | Velocity at boundary, z component     | Boundary 41 |         |
| spf.ubndx | if(!incontact_ap3,spf.utrx+spf.usx,0) | m/s                            | Velocity at boundary, x component     | Boundary 12 |         |
| spf.ubndy | if(!incontact_ap3,spf.uty+spf.usy,0)  | m/s                            | Velocity at boundary, y component     | Boundary 12 |         |
| spf.ubndz | if(!incontact_ap3,spf.utz+spf.usz,0)  | m/s                            | Velocity at boundary, z component     | Boundary 12 |         |
| spf.usx   | 0                                     | m/s                            | Velocity of sliding wall, x component | Boundary 41 |         |
| spf.usy   | 0                                     | m/s                            | Velocity of sliding wall, y component | Boundary 41 |         |
| spf.usz   | 0                                     | m/s                            | Velocity of sliding wall, z component | Boundary 41 |         |
| spf.usx   | 0                                     | m/s                            | Velocity of sliding wall, x component | Boundary 12 |         |
| spf.usy   | 0                                     | m/s                            | Velocity of sliding wall, y component | Boundary 12 |         |

| Name                      | Expression                                                                   | Unit | Description                           | Selection   | Details     |
|---------------------------|------------------------------------------------------------------------------|------|---------------------------------------|-------------|-------------|
| spf.usz                   | 0                                                                            | m/s  | Velocity of sliding wall, z component | Boundary 12 |             |
| spf.utrx                  | if(!incontact_ap3,d(x,TI ME),0)                                              | m/s  | Velocity of moving wall, x component  | Boundary 41 |             |
| spf.utry                  | if(!incontact_ap3,d(y,TI ME),0)                                              | m/s  | Velocity of moving wall, y component  | Boundary 41 |             |
| spf.utrz                  | if(!incontact_ap3,d(z,TI ME),0)                                              | m/s  | Velocity of moving wall, z component  | Boundary 41 |             |
| spf.utrx                  | 0                                                                            | m/s  | Velocity of moving wall, x component  | Boundary 12 |             |
| spf.utry                  | 0                                                                            | m/s  | Velocity of moving wall, y component  | Boundary 12 |             |
| spf.utrz                  | 0                                                                            | m/s  | Velocity of moving wall, z component  | Boundary 12 |             |
| spf.uLeakage <sub>x</sub> | 0                                                                            | m/s  | Leakage velocity, x component         | Boundary 41 | + operation |
| spf.uLeakage <sub>y</sub> | 0                                                                            | m/s  | Leakage velocity, y component         | Boundary 41 | + operation |
| spf.uLeakage <sub>z</sub> | 0                                                                            | m/s  | Leakage velocity, z component         | Boundary 41 | + operation |
| spf.uLeakage <sub>x</sub> | 0                                                                            | m/s  | Leakage velocity, x component         | Boundary 12 | + operation |
| spf.uLeakage <sub>y</sub> | 0                                                                            | m/s  | Leakage velocity, y component         | Boundary 12 | + operation |
| spf.uLeakage <sub>z</sub> | 0                                                                            | m/s  | Leakage velocity, z component         | Boundary 12 | + operation |
| spf.noSlipWall            | if(!incontact_ap3,1,0)                                                       | 1    | Help variable                         | Boundary 41 |             |
| spf.noSlipWall            | if(!incontact_ap3,1,0)                                                       | 1    | Help variable                         | Boundary 12 |             |
| spf.un_here               | if(!incontact_ap3,u*nojac(spfxmesh)+v*nojac(spfnymesh)+w*nojac(spfnzmesh),0) | m/s  | Intermediate variable                 | Boundary 41 |             |
| spf.un_here               | if(!incontact_ap3,u*nojac(spfxmesh)+v*nojac(spfnymesh)+w*nojac(spfnzmesh),0) | m/s  | Intermediate variable                 | Boundary 12 |             |

| Name         | Expression                                                                                                                                         | Unit | Description                        | Selection   | Details |
|--------------|----------------------------------------------------------------------------------------------------------------------------------------------------|------|------------------------------------|-------------|---------|
|              | c(spfnzmesh),0)                                                                                                                                    |      |                                    |             |         |
| spf.u_herex  | if(!incontact_ap3,spf.un_here*nojac(spfnxmesh),0)                                                                                                  | m/s  | Intermediate variable, x component | Boundary 41 |         |
| spf.u_herey  | if(!incontact_ap3,spf.un_here*nojac(spfnymesh),0)                                                                                                  | m/s  | Intermediate variable, y component | Boundary 41 |         |
| spf.u_herez  | if(!incontact_ap3,spf.un_here*nojac(spfnzmesh),0)                                                                                                  | m/s  | Intermediate variable, z component | Boundary 41 |         |
| spf.u_herex  | if(!incontact_ap3,spf.un_here*nojac(spfnxmesh),0)                                                                                                  | m/s  | Intermediate variable, x component | Boundary 12 |         |
| spf.u_herey  | if(!incontact_ap3,spf.un_here*nojac(spfnymesh),0)                                                                                                  | m/s  | Intermediate variable, y component | Boundary 12 |         |
| spf.u_herez  | if(!incontact_ap3,spf.un_here*nojac(spfnzmesh),0)                                                                                                  | m/s  | Intermediate variable, z component | Boundary 12 |         |
| spf.un_there | if(!incontact_ap3,(spf.ubndx+spf.uLeakage)*nojac(spfnxmesh)+(spf.ubndy+spf.uLeakage)*nojac(spfnymesh)+(spf.ubndz+spf.uLeakage)*nojac(spfnzmesh),0) | m/s  | Intermediate variable              | Boundary 41 |         |
| spf.un_there | if(!incontact_ap3,(spf.ubndx+spf.uLeakage)*nojac(spfnxmesh)+(spf.ubndy+spf.uLeakage)*nojac(spfnymesh)+(spf.ubndz+spf.uLeakage)*nojac(spfnzmesh),0) | m/s  | Intermediate variable              | Boundary 12 |         |
| spf.u_therex | if(!incontact_ap3,spf.un_there*nojac(spfnxmesh),0)                                                                                                 | m/s  | Intermediate variable, x component | Boundary 41 |         |
| spf.u_therey | if(!incontact_ap3,spf.un_there*nojac(spfnymesh),0)                                                                                                 | m/s  | Intermediate variable, y component | Boundary 41 |         |
| spf.u_therez | if(!incontact_ap3,spf.un_there*nojac(spfnzmesh),0)                                                                                                 | m/s  | Intermediate variable, z component | Boundary 41 |         |

| Name                         | Expression                                                                                                                                                                                            | Unit             | Description                         | Selection   | Details |
|------------------------------|-------------------------------------------------------------------------------------------------------------------------------------------------------------------------------------------------------|------------------|-------------------------------------|-------------|---------|
| spf.u_there <sub>x</sub>     | if(!incontact_ap3,spf.un_there*nojac(spf.nxm <sub>esh</sub> ),0)                                                                                                                                      | m/s              | Intermediate variable, x component  | Boundary 12 |         |
| spf.u_there <sub>y</sub>     | if(!incontact_ap3,spf.un_there*nojac(spf.nym <sub>esh</sub> ),0)                                                                                                                                      | m/s              | Intermediate variable, y component  | Boundary 12 |         |
| spf.u_there <sub>z</sub>     | if(!incontact_ap3,spf.un_there*nojac(spf.nzm <sub>esh</sub> ),0)                                                                                                                                      | m/s              | Intermediate variable, z component  | Boundary 12 |         |
| spf.unJump                   | if(!incontact_ap3,spf.un_here-spf.un_there,0)                                                                                                                                                         | m/s              | Jump in normal velocity             | Boundary 41 |         |
| spf.unJump                   | if(!incontact_ap3,spf.un_here-spf.un_there,0)                                                                                                                                                         | m/s              | Jump in normal velocity             | Boundary 12 |         |
| spf.KStressn_av <sub>x</sub> | if(!incontact_ap3,spf.K_stress_tensor <sub>xx</sub> *spf.nxm <sub>esh</sub> +spf.K_stress_tensor <sub>xy</sub> *spf.nym <sub>esh</sub> +spf.K_stress_tensor <sub>xz</sub> *spf.nzm <sub>esh</sub> ,0) | N/m <sup>2</sup> | Average viscous stress, x component | Boundary 41 |         |
| spf.KStressn_av <sub>y</sub> | if(!incontact_ap3,spf.K_stress_tensor <sub>yx</sub> *spf.nxm <sub>esh</sub> +spf.K_stress_tensor <sub>yy</sub> *spf.nym <sub>esh</sub> +spf.K_stress_tensor <sub>yz</sub> *spf.nzm <sub>esh</sub> ,0) | N/m <sup>2</sup> | Average viscous stress, y component | Boundary 41 |         |
| spf.KStressn_av <sub>z</sub> | if(!incontact_ap3,spf.K_stress_tensor <sub>zx</sub> *spf.nxm <sub>esh</sub> +spf.K_stress_tensor <sub>zy</sub> *spf.nym <sub>esh</sub> +spf.K_stress_tensor <sub>zz</sub> *spf.nzm <sub>esh</sub> ,0) | N/m <sup>2</sup> | Average viscous stress, z component | Boundary 41 |         |
| spf.KStressn_av <sub>x</sub> | if(!incontact_ap3,spf.K_stress_tensor <sub>xx</sub> *spf.nxm <sub>esh</sub> +spf.K_stress_tensor <sub>xy</sub> *spf.nym <sub>esh</sub> +spf.K_stress_tensor <sub>xz</sub> *spf.nzm <sub>esh</sub> ,0) | N/m <sup>2</sup> | Average viscous stress, x component | Boundary 12 |         |
| spf.KStressn_av <sub>y</sub> | if(!incontact_ap3,spf.K_stress_tensor <sub>yx</sub> *spf.nxm <sub>esh</sub> +spf.K_stress_tensor <sub>yy</sub> *spf.nym <sub>esh</sub> +spf.K_stress_tensor <sub>yz</sub> *spf.nzm <sub>esh</sub> ,0) | N/m <sup>2</sup> | Average viscous stress, y component | Boundary 12 |         |
| spf.KStressn_av <sub>z</sub> | if(!incontact_ap3,spf.K                                                                                                                                                                               | N/m <sup>2</sup> | Average viscous                     | Boundary 12 |         |

| Name                     | Expression                                                                                                                                                     | Unit             | Description                               | Selection   | Details |
|--------------------------|----------------------------------------------------------------------------------------------------------------------------------------------------------------|------------------|-------------------------------------------|-------------|---------|
|                          | _stress_tensorzx*spf.nx<br>mesh+spf.K_stress_ten<br>sorzy*spf.nymesh+spf.<br>K_stress_tensorzz*spf.<br>nzmesh,0)                                               |                  | stress, z<br>component                    |             |         |
| spf.KStressTestn_a<br>vx | if(!incontact_ap3,spf.K<br>_stress_tensor_testxx*s<br>pf.nxmesh+spf.K_stres<br>s_tensor_testxy*spf.ny<br>mesh+spf.K_stress_ten<br>sor_testxz*spf.nzmesh,<br>0) | N/m <sup>2</sup> | Average viscous<br>stress, x<br>component | Boundary 41 |         |
| spf.KStressTestn_a<br>vy | if(!incontact_ap3,spf.K<br>_stress_tensor_testyx*s<br>pf.nxmesh+spf.K_stres<br>s_tensor_testyy*spf.ny<br>mesh+spf.K_stress_ten<br>sor_testyz*spf.nzmesh,<br>0) | N/m <sup>2</sup> | Average viscous<br>stress, y<br>component | Boundary 41 |         |
| spf.KStressTestn_a<br>vz | if(!incontact_ap3,spf.K<br>_stress_tensor_testzx*s<br>pf.nxmesh+spf.K_stres<br>s_tensor_testzy*spf.ny<br>mesh+spf.K_stress_ten<br>sor_testzz*spf.nzmesh,<br>0) | N/m <sup>2</sup> | Average viscous<br>stress, z<br>component | Boundary 41 |         |
| spf.KStressTestn_a<br>vx | if(!incontact_ap3,spf.K<br>_stress_tensor_testxx*s<br>pf.nxmesh+spf.K_stres<br>s_tensor_testxy*spf.ny<br>mesh+spf.K_stress_ten<br>sor_testxz*spf.nzmesh,<br>0) | N/m <sup>2</sup> | Average viscous<br>stress, x<br>component | Boundary 12 |         |
| spf.KStressTestn_a<br>vy | if(!incontact_ap3,spf.K<br>_stress_tensor_testyx*s<br>pf.nxmesh+spf.K_stres<br>s_tensor_testyy*spf.ny<br>mesh+spf.K_stress_ten<br>sor_testyz*spf.nzmesh,<br>0) | N/m <sup>2</sup> | Average viscous<br>stress, y<br>component | Boundary 12 |         |
| spf.KStressTestn_a<br>vz | if(!incontact_ap3,spf.K<br>_stress_tensor_testzx*s<br>pf.nxmesh+spf.K_stres<br>s_tensor_testzy*spf.ny<br>mesh+spf.K_stress_ten<br>sor_testzz*spf.nzmesh,<br>0) | N/m <sup>2</sup> | Average viscous<br>stress, z<br>component | Boundary 12 |         |



| Name              | Expression                                                                                 | Unit              | Description                     | Selection   | Details |
|-------------------|--------------------------------------------------------------------------------------------|-------------------|---------------------------------|-------------|---------|
|                   | 0)                                                                                         |                   |                                 |             |         |
| spf.ujumpx        | if(!incontact_ap3,spf.u_herex-spf.u_there,0)                                               | m/s               | Velocity jump, x component      | Boundary 41 |         |
| spf.ujumpy        | if(!incontact_ap3,spf.u_herey-spf.u_therey,0)                                              | m/s               | Velocity jump, y component      | Boundary 41 |         |
| spf.ujumpz        | if(!incontact_ap3,spf.u_herez-spf.u_therez,0)                                              | m/s               | Velocity jump, z component      | Boundary 41 |         |
| spf.ujumpx        | if(!incontact_ap3,spf.u_herex-spf.u_there,0)                                               | m/s               | Velocity jump, x component      | Boundary 12 |         |
| spf.ujumpy        | if(!incontact_ap3,spf.u_herey-spf.u_therey,0)                                              | m/s               | Velocity jump, y component      | Boundary 12 |         |
| spf.ujumpz        | if(!incontact_ap3,spf.u_herez-spf.u_therez,0)                                              | m/s               | Velocity jump, z component      | Boundary 12 |         |
| spf.contCoeffFace | if(!incontact_ap3,down(spf.contCoeff),0)                                                   | kg/m <sup>3</sup> | Help variable                   | Boundary 41 |         |
| spf.contCoeffFace | if(!incontact_ap3,down(spf.contCoeff),0)                                                   | kg/m <sup>3</sup> | Help variable                   | Boundary 12 |         |
| spf.rhoFace       | if(!incontact_ap3,down(spf.rho),0)                                                         | kg/m <sup>3</sup> | Density face value              | Boundary 41 |         |
| spf.rhoFace       | if(!incontact_ap3,down(spf.rho),0)                                                         | kg/m <sup>3</sup> | Density face value              | Boundary 12 |         |
| spf.c_here        | if(!incontact_ap3,36*n<br>ojac(down(spf.mu+spf.muT)/down(1))*spf.meshVol/spf.meshVolInt,0) | Pa-s/m            | Intermediate variable           | Boundary 41 |         |
| spf.c_here        | if(!incontact_ap3,36*n<br>ojac(down(spf.mu+spf.muT)/down(1))*spf.meshVol/spf.meshVolInt,0) | Pa-s/m            | Intermediate variable           | Boundary 12 |         |
| spf.meshVol       | if(!incontact_ap3,meshvol_spatial,if(!incontact_ap3,meshvol,0))                            | m <sup>2</sup>    |                                 | Boundary 41 |         |
| spf.meshVol       | if(!incontact_ap3,meshvol_spatial,if(!incontact_ap3,meshvol,0))                            | m <sup>2</sup>    |                                 | Boundary 12 |         |
| spf.meshVolInt    | if(!incontact_ap3,down(meshvol_spatial),if(!incontact_ap3,down(meshvol),0))                | m <sup>3</sup>    | Volume of interior mesh element | Boundary 41 |         |
| spf.meshVolInt    | if(!incontact_ap3,down                                                                     | m <sup>3</sup>    | Volume of                       | Boundary 12 |         |

| Name            | Expression                                                                                                                                                                                     | Unit                                               | Description                         | Selection   | Details |
|-----------------|------------------------------------------------------------------------------------------------------------------------------------------------------------------------------------------------|----------------------------------------------------|-------------------------------------|-------------|---------|
|                 | (meshvol_spatial),if(!incontact_ap3,down(meshvol),0))                                                                                                                                          |                                                    | interior mesh element               |             |         |
| spf.sigma_dg_ns | if(!incontact_ap3,4*spf.c_here,0)                                                                                                                                                              | Pa·s/m                                             |                                     | Boundary 41 |         |
| spf.sigma_dg_ns | if(!incontact_ap3,4*spf.c_here,0)                                                                                                                                                              | Pa·s/m                                             |                                     | Boundary 12 |         |
| spf.umxTnFace   | if(!incontact_ap3,(spf.upwind_helpx*spf.nxmsh+spf.upwind_helpy*spf.nymesh+spf.upwind_helpz*spf.nzmsh<0)*(spf.upwind_helpx*spf.nxmsh+spf.upwind_helpy*spf.nymesh+spf.upwind_helpz*spf.nzmsh),0) | m/s                                                | Relative velocity on face           | Boundary 41 |         |
| spf.umxTnFace   | if(!incontact_ap3,(spf.upwind_helpx*spf.nxmsh+spf.upwind_helpy*spf.nymesh+spf.upwind_helpz*spf.nzmsh<0)*(spf.upwind_helpx*spf.nxmsh+spf.upwind_helpy*spf.nymesh+spf.upwind_helpz*spf.nzmsh),0) | m/s                                                | Relative velocity on face           | Boundary 12 |         |
| spf.upwind_ns   | if(!incontact_ap3,spf.rhoFace*spf.umxTnFace*spf.unJump*test(spfun_here)/down(1)^2,0)                                                                                                           | W/m <sup>2</sup>                                   | Upwind term                         | Boundary 41 |         |
| spf.upwind_ns   | if(!incontact_ap3,spf.rhoFace*spf.umxTnFace*spf.unJump*test(spfun_here)/down(1)^2,0)                                                                                                           | W/m <sup>2</sup>                                   | Upwind term                         | Boundary 12 |         |
| spf.upwindCont  | if(!incontact_ap3,spf.contCoeffFace*spf.unJump*test(p2),0)                                                                                                                                     | kg <sup>2</sup> /(m <sup>3</sup> ·s <sup>3</sup> ) | Upwind term for continuity equation | Boundary 41 |         |
| spf.upwindCont  | if(!incontact_ap3,spf.contCoeffFace*spf.unJump*test(p2),0)                                                                                                                                     | kg <sup>2</sup> /(m <sup>3</sup> ·s <sup>3</sup> ) | Upwind term for continuity equation | Boundary 12 |         |
| spf.pFace       | if(!incontact_ap3,p2,0)                                                                                                                                                                        | Pa                                                 | Pressure face value                 | Boundary 41 |         |
| spf.pFace       | if(!incontact_ap3,p2,0)                                                                                                                                                                        | Pa                                                 | Pressure face                       | Boundary 12 |         |

| Name          | Expression                                                                                                                                                     | Unit                           | Description                                                | Selection   | Details     |
|---------------|----------------------------------------------------------------------------------------------------------------------------------------------------------------|--------------------------------|------------------------------------------------------------|-------------|-------------|
|               |                                                                                                                                                                |                                | value                                                      |             |             |
| spf.consFlux  | if(!incontact_ap3,-<br>spf.pFace*test(spf.un_<br>here),0)                                                                                                      | W/m <sup>2</sup>               | Conservative flux                                          | Boundary 41 | + operation |
| spf.consFlux  | if(!incontact_ap3,-<br>spf.pFace*test(spf.un_<br>here),0)                                                                                                      | W/m <sup>2</sup>               | Conservative flux                                          | Boundary 12 | + operation |
| spf.d_w_plus  | if(!incontact_ap3,nojac<br>(max(11.06,0.5*spf.mix<br>LParam^0.25*sqrt(spf.<br>k_nn)*down(spf.rho))/(<br>down(spf.mu)*down(tr<br>emetric_spatial)^0.5))),<br>0) | 1                              | Wall lift-off in<br>viscous units                          | Boundary 41 |             |
| spf.d_w_plus  | if(!incontact_ap3,nojac<br>(max(11.06,0.5*spf.mix<br>LParam^0.25*sqrt(spf.<br>k_nn)*down(spf.rho))/(<br>down(spf.mu)*down(tr<br>emetric_spatial)^0.5))),<br>0) | 1                              | Wall lift-off in<br>viscous units                          | Boundary 12 |             |
| spf.uPlus     | if(!incontact_ap3,log(s<br>pf.d_w_plus)/spf.kappa<br>v+spf.B,0)                                                                                                | 1                              | Tangential<br>velocity in<br>viscous units                 | Boundary 41 | + operation |
| spf.uPlus     | if(!incontact_ap3,log(s<br>pf.d_w_plus)/spf.kappa<br>v+spf.B,0)                                                                                                | 1                              | Tangential<br>velocity in<br>viscous units                 | Boundary 12 | + operation |
| spf.mixLParam | if(!incontact_ap3,spf.C<br>_mu,0)                                                                                                                              | 1                              | Intermediate<br>variable                                   | Boundary 41 |             |
| spf.mixLParam | if(!incontact_ap3,spf.C<br>_mu,0)                                                                                                                              | 1                              | Intermediate<br>variable                                   | Boundary 12 |             |
| spf.ep_w      | if(!incontact_ap3,spf.m<br>ixLParam*spf.k_nn^2*<br>nojac(down(spf.rho))/(<br>spf.kappav*spf.d_w_pl<br>us*nojac(down(spf.mu<br>))),0)                           | m <sup>2</sup> /s <sup>3</sup> | Turbulent<br>dissipation rate,<br>(wall adjacent<br>cells) | Boundary 41 |             |
| spf.ep_w      | if(!incontact_ap3,spf.m<br>ixLParam*spf.k_nn^2*<br>nojac(down(spf.rho))/(<br>spf.kappav*spf.d_w_pl<br>us*nojac(down(spf.mu<br>))),0)                           | m <sup>2</sup> /s <sup>3</sup> | Turbulent<br>dissipation rate,<br>(wall adjacent<br>cells) | Boundary 12 |             |
| spf.u_tau     | if(!incontact_ap3,nojac                                                                                                                                        | m/s                            | Friction velocity                                          | Boundary 41 |             |

| Name        | Expression                                                                                                                                                                                                                                                                                   | Unit | Description                 | Selection   | Details |
|-------------|----------------------------------------------------------------------------------------------------------------------------------------------------------------------------------------------------------------------------------------------------------------------------------------------|------|-----------------------------|-------------|---------|
|             | $(\max(\text{spf.mixLParam}^{\wedge} 0.25 \cdot \sqrt{\text{spf.k\_nn}}, \sqrt{\text{t}(\text{spf.u\_tangx}^{\wedge} 2 + \text{spf.u\_tangy}^{\wedge} 2 + \text{spf.u\_tangz}^{\wedge} 2 + \text{eps}) / \text{spf.uPlus})), 0)$                                                             |      |                             |             |         |
| spf.u_tau   | $\text{if}(\text{!incontact\_ap3}, \text{nojac}(\max(\text{spf.mixLParam}^{\wedge} 0.25 \cdot \sqrt{\text{spf.k\_nn}}, \sqrt{\text{t}(\text{spf.u\_tangx}^{\wedge} 2 + \text{spf.u\_tangy}^{\wedge} 2 + \text{spf.u\_tangz}^{\wedge} 2 + \text{eps}) / \text{spf.uPlus})), 0)$               | m/s  | Friction velocity           | Boundary 12 |         |
| spf.u_tangx | $\text{if}(\text{!incontact\_ap3}, \text{u-sp}(\text{spf.ubndx-sp}(\text{spf.nxmesh} * ((\text{u-sp}(\text{spf.ubndx}) * \text{spf.nxmesh} + (\text{v-sp}(\text{spf.ubndy}) * \text{spf.ny}(\text{mesh} + (\text{w-sp}(\text{spf.ubndz}) * \text{spf.nz}(\text{mesh}))), 0)$                 | m/s  | Velocity field, x component | Boundary 41 |         |
| spf.u_tangy | $\text{if}(\text{!incontact\_ap3}, \text{v-sp}(\text{spf.ubndy-sp}(\text{spf.ny}(\text{mesh} * ((\text{u-sp}(\text{spf.ubndx}) * \text{spf.nx}(\text{mesh} + (\text{v-sp}(\text{spf.ubndy}) * \text{spf.ny}(\text{mesh} + (\text{w-sp}(\text{spf.ubndz}) * \text{spf.nz}(\text{mesh}))), 0)$ | m/s  | Velocity field, y component | Boundary 41 |         |
| spf.u_tangz | $\text{if}(\text{!incontact\_ap3}, \text{w-sp}(\text{spf.ubndz-sp}(\text{spf.nz}(\text{mesh} * ((\text{u-sp}(\text{spf.ubndx}) * \text{spf.nx}(\text{mesh} + (\text{v-sp}(\text{spf.ubndy}) * \text{spf.ny}(\text{mesh} + (\text{w-sp}(\text{spf.ubndz}) * \text{spf.nz}(\text{mesh}))), 0)$ | m/s  | Velocity field, z component | Boundary 41 |         |
| spf.u_tangx | $\text{if}(\text{!incontact\_ap3}, \text{u-sp}(\text{spf.ubndx-sp}(\text{spf.nxmesh} * ((\text{u-sp}(\text{spf.ubndx}) * \text{spf.nxmesh} + (\text{v-sp}(\text{spf.ubndy}) * \text{spf.ny}(\text{mesh} + (\text{w-sp}(\text{spf.ubndz}) * \text{spf.nz}(\text{mesh}))), 0)$                 | m/s  | Velocity field, x component | Boundary 12 |         |

| Name             | Expression                                                                                                                                              | Unit | Description                             | Selection   | Details |
|------------------|---------------------------------------------------------------------------------------------------------------------------------------------------------|------|-----------------------------------------|-------------|---------|
|                  | ),0)                                                                                                                                                    |      |                                         |             |         |
| spf.u_tangy      | if(!incontact_ap3,v-<br>spf.ubndy-<br>spf.nymesh*((u-<br>spf.ubndx)*spf.nxmesh<br>+(v-<br>spf.ubndy)*spf.nymes<br>h+(w-<br>spf.ubndz)*spf.nzmesh<br>,0) | m/s  | Velocity field, y<br>component          | Boundary 12 |         |
| spf.u_tangz      | if(!incontact_ap3,w-<br>spf.ubndz-<br>spf.nzmesh*((u-<br>spf.ubndx)*spf.nxmesh<br>+(v-<br>spf.ubndy)*spf.nymes<br>h+(w-<br>spf.ubndz)*spf.nzmesh<br>,0) | m/s  | Velocity field, z<br>component          | Boundary 12 |         |
| spf.delta_w      | if(!incontact_ap3,spf.d<br>_w_plus*down(spf.mu)<br>/(down(spf.rho)*max(s<br>pf.u_tau,sqrt(eps))),0)                                                     | m    | Wall lift-off                           | Boundary 41 |         |
| spf.delta_w      | if(!incontact_ap3,spf.d<br>_w_plus*down(spf.mu)<br>/(down(spf.rho)*max(s<br>pf.u_tau,sqrt(eps))),0)                                                     | m    | Wall lift-off                           | Boundary 12 |         |
| spf.uStar        | if(!incontact_ap3,spf.u_<br>tau,0)                                                                                                                      | m/s  | Friction velocity                       | Boundary 41 |         |
| spf.uStar        | if(!incontact_ap3,spf.u_<br>tau,0)                                                                                                                      | m/s  | Friction velocity                       | Boundary 12 |         |
| spf.Delta_wPlus  | if(!incontact_ap3,spf.d<br>_w_plus,0)                                                                                                                   | 1    | Wall resolution<br>in viscous units     | Boundary 41 |         |
| spf.Delta_wPlus  | if(!incontact_ap3,spf.d<br>_w_plus,0)                                                                                                                   | 1    | Wall resolution<br>in viscous units     | Boundary 12 |         |
| spf.WRHeightExpr | if(!incontact_ap3,-<br>11.06+spf.d_w_plus,0)                                                                                                            | 1    | Wall resolution<br>height<br>expression | Boundary 41 |         |
| spf.WRHeightExpr | if(!incontact_ap3,-<br>11.06+spf.d_w_plus,0)                                                                                                            | 1    | Wall resolution<br>height<br>expression | Boundary 12 |         |

#### Weak expressions

| Weak expression | Integration order | Integration frame | Selection |
|-----------------|-------------------|-------------------|-----------|
|-----------------|-------------------|-------------------|-----------|

| Weak expression                                                                                                                                                                                                                                                                                                        | Integration order | Integration frame | Selection   |
|------------------------------------------------------------------------------------------------------------------------------------------------------------------------------------------------------------------------------------------------------------------------------------------------------------------------|-------------------|-------------------|-------------|
| if(!lincontact_ap3,spf.KStressn_avx*test(spf.u_herex)+spf.KStressn_avy*test(spf.u_herey)+spf.KStressn_avz*test(spf.u_herez)+spf.KStressTestn_avx*spf.ujumpx+spf.KStressTestn_avy*spf.ujumpy+spf.KStressTestn_avz*spf.ujumpz-spfi.sigma_dg_ns*spf.unJump*test(spf.un_here)+spf.upwind_ns+spf.upwindCont+spf.consFlux,0) | 2                 | Spatial           | Boundary 41 |
| if(!lincontact_ap3,spf.KStressn_avx*test(spf.u_herex)+spf.KStressn_avy*test(spf.u_herey)+spf.KStressn_avz*test(spf.u_herez)+spf.KStressTestn_avx*spf.ujumpx+spf.KStressTestn_avy*spf.ujumpy+spf.KStressTestn_avz*spf.ujumpz-spfi.sigma_dg_ns*spf.unJump*test(spf.un_here)+spf.upwind_ns+spf.upwindCont+spf.consFlux,0) | 2                 | Spatial           | Boundary 12 |
| if(!lincontact_ap3,down(spf.rho)*spf.u_tau*(-spf.u_tangx*test(u)-spf.u_tangy*test(v)-spf.u_tangz*test(w))/spf.uPlus,0)                                                                                                                                                                                                 | 2                 | Spatial           | Boundary 41 |
| if(!lincontact_ap3,down(spf.rho)*spf.u_tau*(-spf.u_tangx*test(u)-spf.u_tangy*test(v)-spf.u_tangz*test(w))/spf.uPlus,0)                                                                                                                                                                                                 | 2                 | Spatial           | Boundary 12 |

#### Constraints

| Constraint                          | Constraint force                 | Shape function    | Selection   | Details   |
|-------------------------------------|----------------------------------|-------------------|-------------|-----------|
| if(!lincontact_ap3,-ep2+spf.ep_w,0) | if(!lincontact_ap3,test(-ep2),0) | Lagrange (Linear) | Boundary 41 | Elemental |
| if(!lincontact_ap3,-ep2+spf.ep_w,0) | if(!lincontact_ap3,test(-ep2),0) | Lagrange (Linear) | Boundary 12 | Elemental |

## 2.4.8 Pressure Point Constraint 1

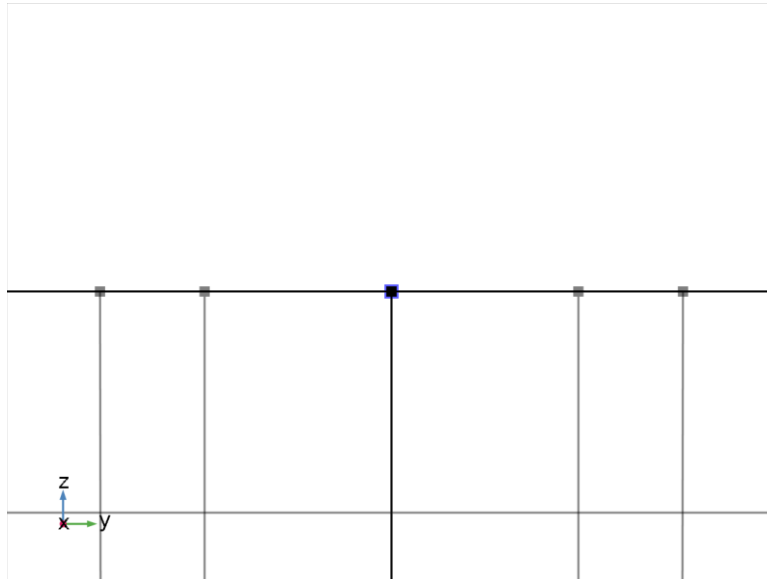

*Pressure Point Constraint 1*

### SELECTION

|                        |                                      |
|------------------------|--------------------------------------|
| Geometric entity level | Point                                |
| Selection              | Geometry geom1: Dimension 0: Point 1 |

### EQUATIONS

$$p2 = (p_0 + p_{\text{hydro}})$$

$$p_{\text{hydro}} = \rho_{\text{ref}} \mathbf{g} \cdot (\mathbf{r} - \mathbf{r}_{\text{ref}})$$

### Pressure constraint

#### SETTINGS

| Description                         | Value |
|-------------------------------------|-------|
| Pressure                            | 0     |
| Compensate for hydrostatic pressure | On    |

### Variables

| Name   | Expression  | Unit | Description | Selection |
|--------|-------------|------|-------------|-----------|
| spf.p0 | spf.p_hydro | Pa   | Pressure    | Point 1   |

### Constraints

| Constraint | Constraint force | Shape function    | Selection | Details   |
|------------|------------------|-------------------|-----------|-----------|
| -p2+spf.p0 | test(-p2)        | Lagrange (Linear) | Point 1   | Elemental |

## 2.5 MESH 1

### MESH STATISTICS

| Description             | Value   |
|-------------------------|---------|
| Minimum element quality | 0.0238  |
| Average element quality | 0.6845  |
| Tetrahedron             | 1279384 |
| Pyramid                 | 1311    |
| Prism                   | 315551  |
| Triangle                | 85446   |
| Quad                    | 380     |
| Edge element            | 4900    |
| Vertex element          | 155     |

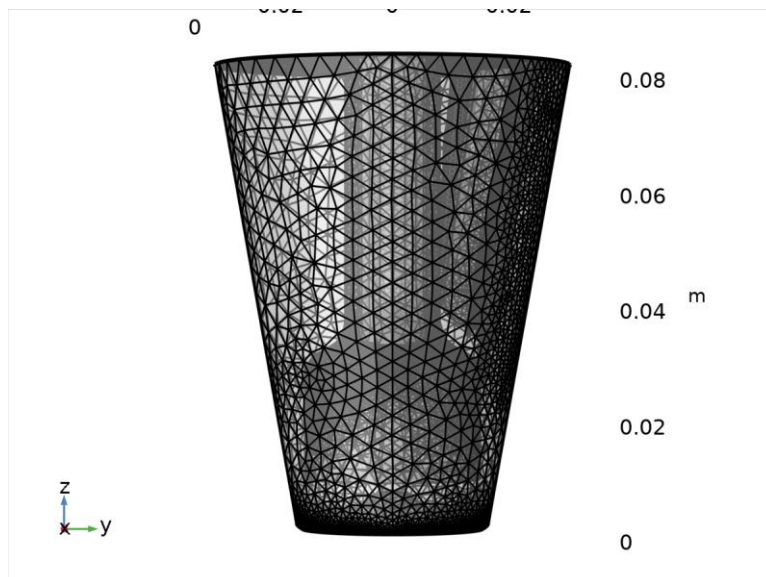

Mesh 1

### 2.5.1 Size (size)

#### SETTINGS

| Description                  | Value          |
|------------------------------|----------------|
| Calibrate for                | Fluid dynamics |
| Maximum element size         | 0.005          |
| Minimum element size         | mf1            |
| Curvature factor             | 0.6            |
| Resolution of narrow regions | 0.7            |
| Maximum element growth rate  | 1.3            |



| Description         | Value  |
|---------------------|--------|
| Custom element size | Custom |

## 2.5.2 Rührer (size1)

### SELECTION

|                        |                                                                             |
|------------------------|-----------------------------------------------------------------------------|
| Geometric entity level | Boundary                                                                    |
| Selection              | Geometry geom1: Dimension 2: Boundaries 42–61, 67–71, 75–85, 89, 92, 94–114 |

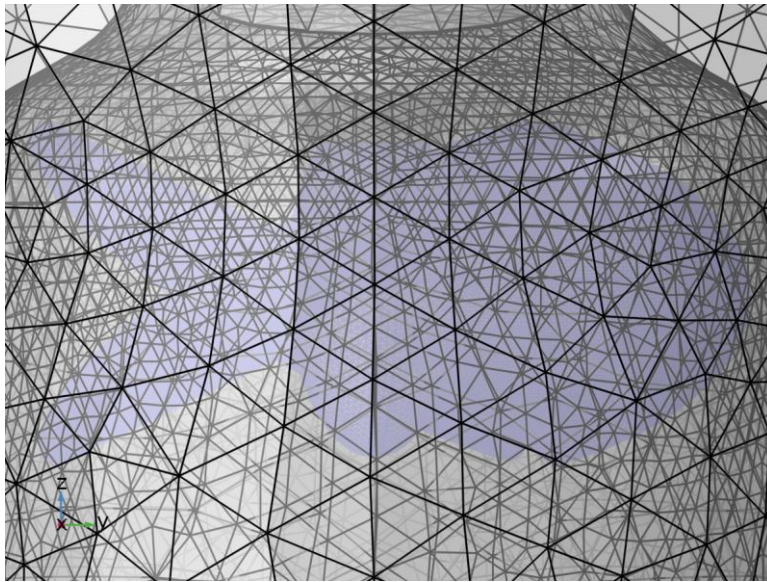

*Rührer*

### SETTINGS

| Description                  | Value          |
|------------------------------|----------------|
| Calibrate for                | Fluid dynamics |
| Maximum element size         | 3E-4           |
| Minimum element size         | mf1            |
| Curvature factor             | 0.5            |
| Resolution of narrow regions | 0.8            |
| Maximum element growth rate  | 1.2            |
| Predefined size              | Finer          |
| Custom element size          | Custom         |

## 2.5.3 Shaft+Sonden (size2)

### SELECTION

|                        |          |
|------------------------|----------|
| Geometric entity level | Boundary |
|------------------------|----------|

|           |                                                                                                                             |
|-----------|-----------------------------------------------------------------------------------------------------------------------------|
| Selection | Geometry geom1: Dimension 2: Boundaries 3–7, 9–10, 13–15, 17–19, 21–22, 24–28, 30–33, 35–40, 63–66, 72–74, 86–88, 90–91, 93 |
|-----------|-----------------------------------------------------------------------------------------------------------------------------|

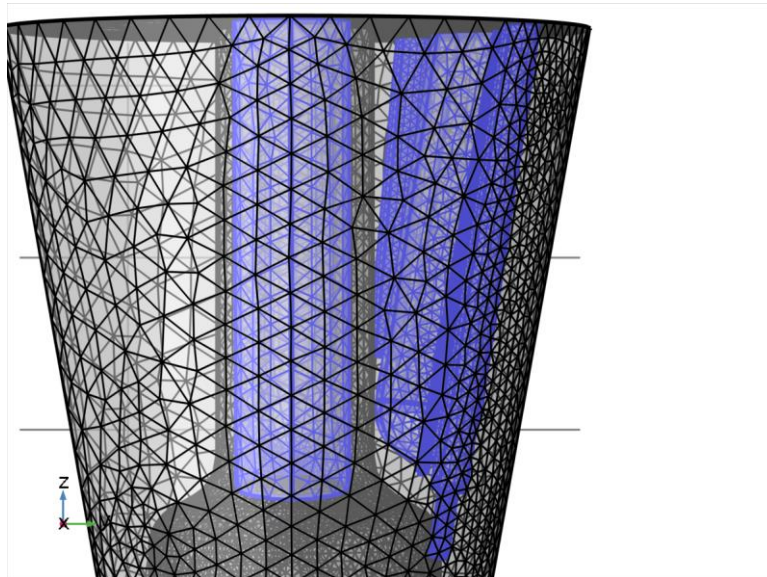

*Shaft+Sonden*

#### SETTINGS

| Description                  | Value          |
|------------------------------|----------------|
| Calibrate for                | Fluid dynamics |
| Maximum element size         | 0.003          |
| Minimum element size         | 1E-4           |
| Curvature factor             | 0.5            |
| Resolution of narrow regions | 0.8            |
| Maximum element growth rate  | 1.2            |
| Custom element size          | Custom         |

### 2.5.4 Rotationsgebiet (size3)

#### SELECTION

|                        |                                          |
|------------------------|------------------------------------------|
| Geometric entity level | Boundary                                 |
| Selection              | Geometry geom1: Dimension 2: Boundary 12 |

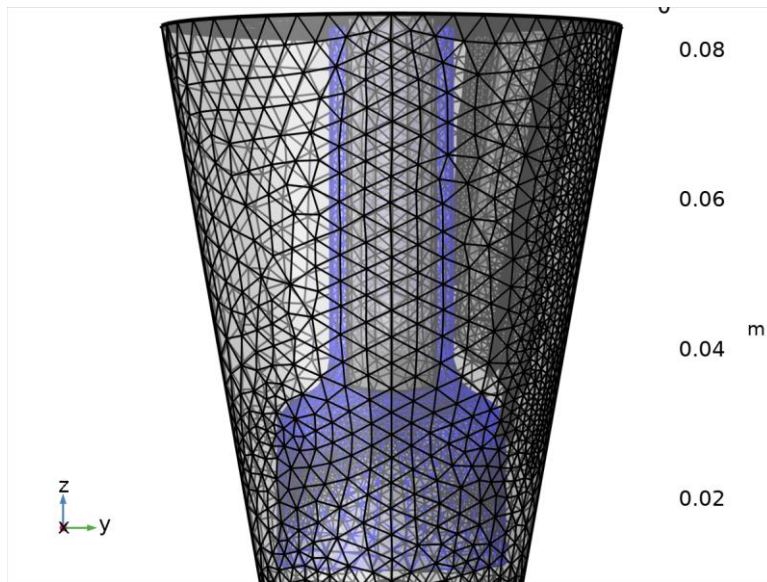

*Rotationsgebiet*

#### SETTINGS

| Description                 | Value          |
|-----------------------------|----------------|
| Calibrate for               | Fluid dynamics |
| Maximum element size        | 0.003          |
| Minimum element size        | mf2            |
| Curvature factor            | 0.2            |
| Maximum element growth rate | 1.2            |
| Custom element size         | Custom         |

### 2.5.5 Corner Refinement 1 (cr1)

#### SELECTION

|                        |                                          |
|------------------------|------------------------------------------|
| Geometric entity level | Domain                                   |
| Selection              | Geometry geom1: Dimension 3: Domains 1–2 |

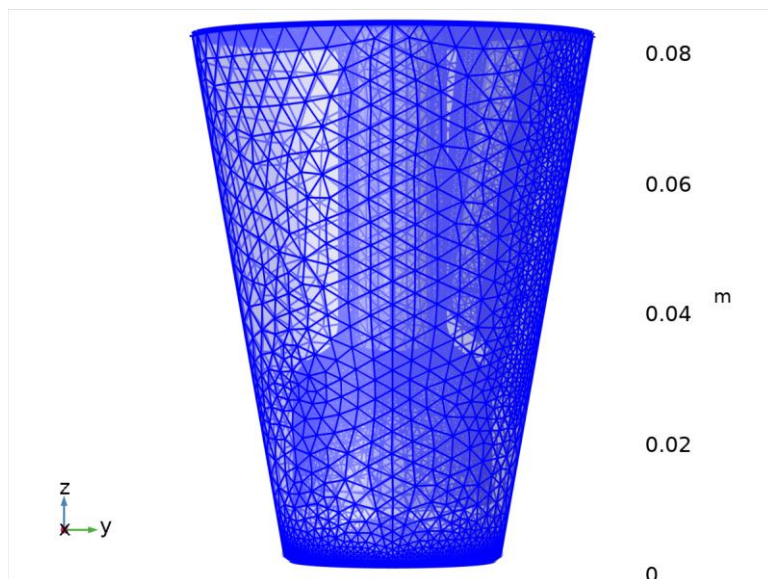

*Corner Refinement 1*

## 2.5.6 Free Tetrahedral 1 (ftet1)

### SELECTION

|                        |                                       |
|------------------------|---------------------------------------|
| Geometric entity level | Domain                                |
| Selection              | Geometry geom1: Dimension 3: Domain 2 |

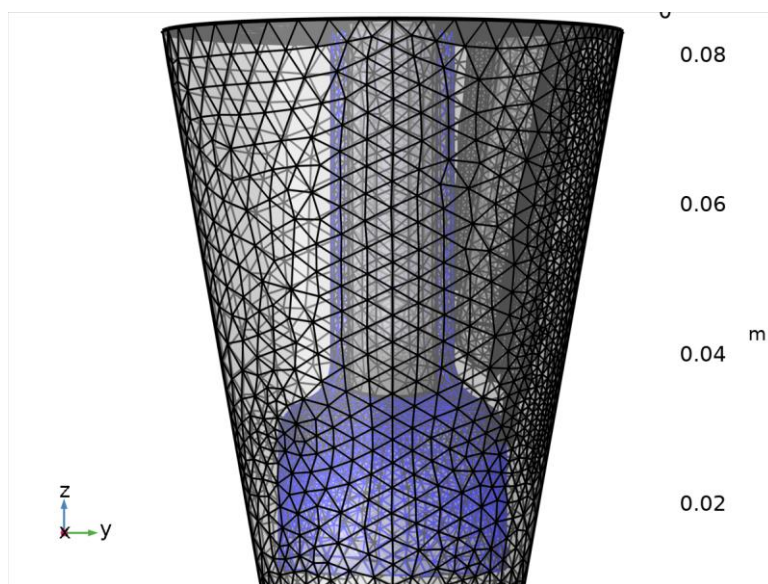

*Free Tetrahedral 1*

## Size 1 (size1)

### SELECTION

|                        |        |
|------------------------|--------|
| Geometric entity level | Domain |
|------------------------|--------|

|           |                                       |
|-----------|---------------------------------------|
| Selection | Geometry geom1: Dimension 3: Domain 2 |
|-----------|---------------------------------------|

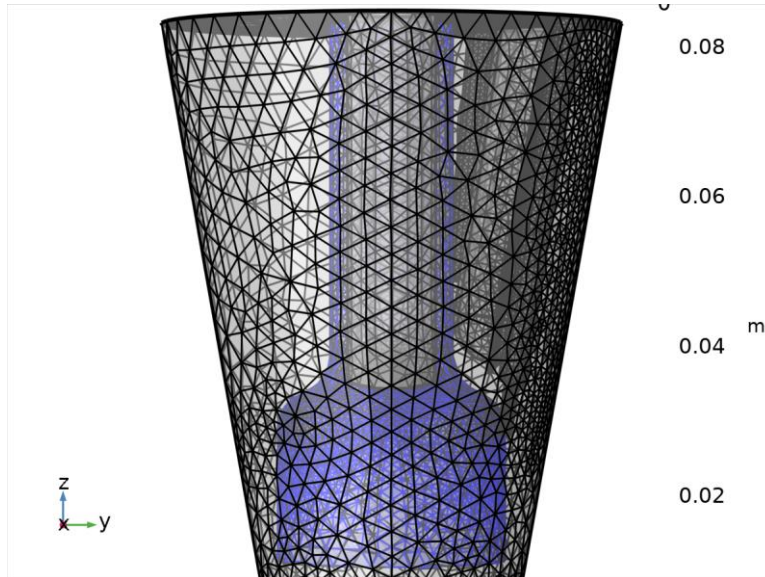

Size 1

#### SETTINGS

| Description                  | Value          |
|------------------------------|----------------|
| Calibrate for                | Fluid dynamics |
| Maximum element size         | 0.003          |
| Minimum element size         | mf2            |
| Curvature factor             | 0.5            |
| Resolution of narrow regions | 0.8            |
| Maximum element growth rate  | 1.2            |
| Custom element size          | Custom         |

### 2.5.7 Free Tetrahedral 2 (ftet2)

#### SELECTION

|                        |           |
|------------------------|-----------|
| Geometric entity level | Domain    |
| Selection              | Remaining |



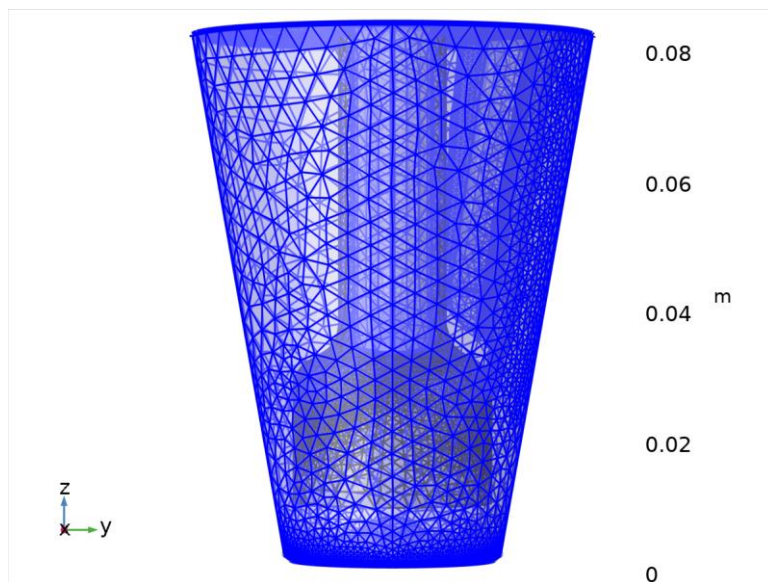

*Free Tetrahedral 2*

## 2.5.8 Boundary Layers 1 (bl1)

### SELECTION

|                        |                |
|------------------------|----------------|
| Geometric entity level | Domain         |
| Selection              | Geometry geom1 |

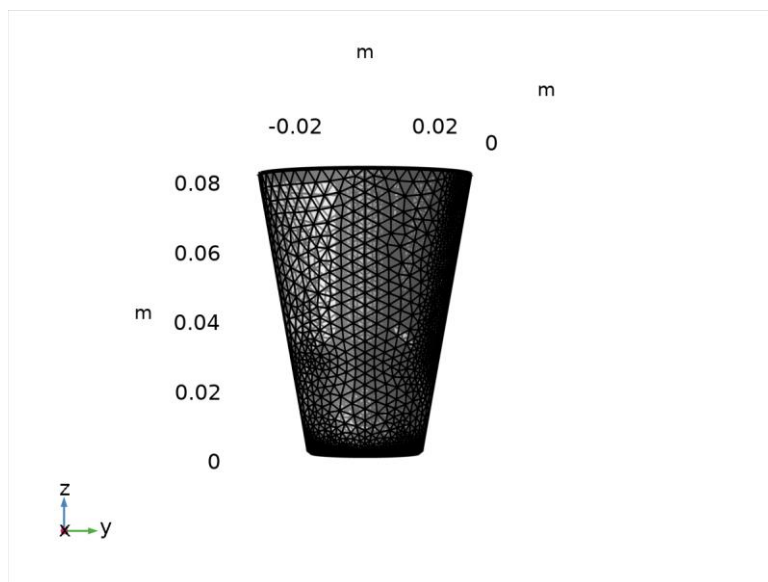

*Boundary Layers 1*

### SETTINGS

| Description             | Value    |
|-------------------------|----------|
| Handling of sharp edges | Trimming |

## Boundary Layer Properties 1 (blp1)

### SELECTION

|                        |                                                                                              |
|------------------------|----------------------------------------------------------------------------------------------|
| Geometric entity level | Boundary                                                                                     |
| Selection              | Geometry geom1: Dimension 2: Boundaries 3–7, 9–10, 13–15, 17–19, 21–22, 24–40, 42–61, 63–114 |

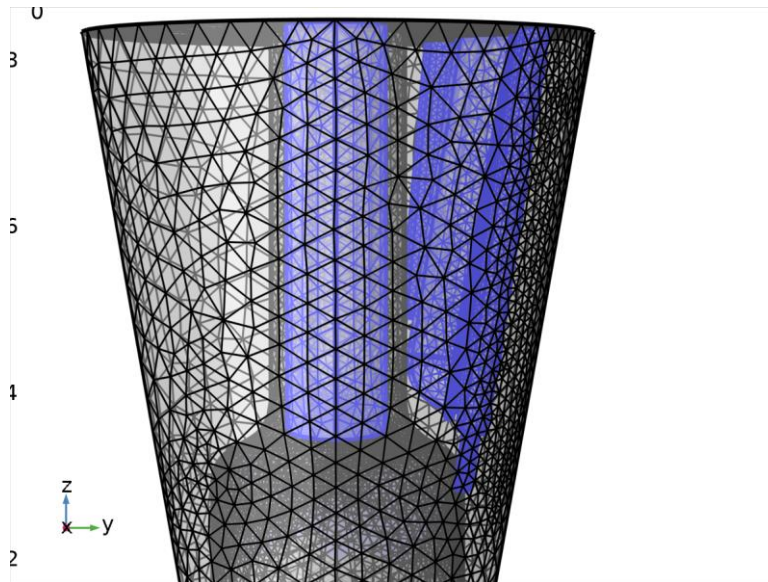

*Boundary Layer Properties 1*

### SETTINGS

| Description                 | Value |
|-----------------------------|-------|
| Number of boundary layers   | 5     |
| Thickness adjustment factor | 2     |

### 3 Study 1

#### COMPUTATION INFORMATION

|                  |                                                |
|------------------|------------------------------------------------|
| Computation time | 8 h 17 min 17 s                                |
| CPU              | Intel64 Family 6 Model 158 Stepping 9, 4 cores |
| Operating system | Windows 10                                     |

#### 3.1 PARAMETRIC SWEEP GESCHWINDIGKEIT

| Parameter name | Parameter value list | Parameter unit |
|----------------|----------------------|----------------|
| f              | range(100,100,800)   | rpm            |

#### STUDY SETTINGS

| Description    | Value                  |
|----------------|------------------------|
| Sweep type     | Specified combinations |
| Parameter name | f                      |
| Unit           | rpm                    |

#### PARAMETERS

| Parameter name | Parameter value list | Parameter unit |
|----------------|----------------------|----------------|
| f              | range(100,100,800)   | rpm            |

#### 3.2 PARAMETRIC MESH

| Parameter name | Parameter value list        | Parameter unit |
|----------------|-----------------------------|----------------|
| mf1            | range(8.0e-5,5.0e-6,1.2e-4) | m              |
| mf2            | range(8.0e-6,5.0e-6,1.2e-5) | m              |

#### STUDY SETTINGS

| Description    | Value                  |
|----------------|------------------------|
| Sweep type     | Specified combinations |
| Parameter name | {mf1, mf2}             |
| Unit           | {m, m}                 |

#### PARAMETERS

| Parameter name | Parameter value list        | Parameter unit |
|----------------|-----------------------------|----------------|
| mf1            | range(8.0e-5,5.0e-6,1.2e-4) | m              |
| mf2            | range(8.0e-6,5.0e-6,1.2e-5) | m              |

#### 3.3 FROZEN ROTOR

#### STUDY SETTINGS



| Description                    | Value |
|--------------------------------|-------|
| Include geometric nonlinearity | On    |

#### PHYSICS AND VARIABLES SELECTION

| Physics interface                   | Discretization |
|-------------------------------------|----------------|
| Turbulent Flow, k- $\epsilon$ (spf) | physics        |

#### MESH SELECTION

| Geometry           | Mesh  |
|--------------------|-------|
| Geometry 1 (geom1) | mesh1 |

### 3.4 SOLVER CONFIGURATIONS

#### 3.4.1 Solution 1

##### Compile Equations: Frozen Rotor (st1)

#### STUDY AND STEP

| Description    | Value                        |
|----------------|------------------------------|
| Use study      | <a href="#">Study 1</a>      |
| Use study step | <a href="#">Frozen Rotor</a> |

#### LOG

```
<---- Compile Equations: Frozen Rotor in Study 1/Solution 1 (sol1) -----
Started at Feb 16, 2021 2:01:13 PM.
Geometry shape order: Linear
Running on 2 x Intel(R) Xeon(R) CPU E5-2680 v3 at 2.50 GHz.
Using 2 sockets with 24 cores in total on g036.
Available memory: 128.55 GB.
Time: 4 s.
Physical memory: 2.36 GB
Virtual memory: 11.55 GB
Ended at Feb 16, 2021 2:01:17 PM.
----- Compile Equations: Frozen Rotor in Study 1/Solution 1 (sol1) ----->
```

##### Dependent Variables 1 (v1)

#### GENERAL

| Description           | Value                        |
|-----------------------|------------------------------|
| Defined by study step | <a href="#">Frozen Rotor</a> |

#### INITIAL VALUE CALCULATION CONSTANTS

| Constant name | Initial value source    |
|---------------|-------------------------|
| f             | range(100,100,800)[rpm] |

#### LOG

```

<---- Dependent Variables 1 in Study 1/Solution 1 (sol1) -----
Started at Feb 16, 2021 2:01:17 PM.
Solution time: 1 s.
Physical memory: 3.17 GB
Virtual memory: 11.55 GB
Ended at Feb 16, 2021 2:01:17 PM.
----- Dependent Variables 1 in Study 1/Solution 1 (sol1) ----->

```

#### Turbulent dissipation rate (comp1.ep2) (comp1\_ep2)

##### GENERAL

| Description      | Value     |
|------------------|-----------|
| Field components | comp1.ep2 |

#### Turbulent kinetic energy (comp1.k2) (comp1\_k2)

##### GENERAL

| Description      | Value    |
|------------------|----------|
| Field components | comp1.k2 |

#### Pressure (comp1.p2) (comp1\_p2)

##### GENERAL

| Description      | Value    |
|------------------|----------|
| Field components | comp1.p2 |

#### Velocity field (spatial frame) (comp1.u) (comp1\_u)

##### GENERAL

| Description        | Value                          |
|--------------------|--------------------------------|
| Field components   | {comp1.u, comp1.v, comp1.w}    |
| Internal variables | comp1.spf.isFluidHasBeenSolved |

#### Stationary Solver 1 (s1)

##### GENERAL

| Description           | Value                        |
|-----------------------|------------------------------|
| Defined by study step | <a href="#">Frozen Rotor</a> |

##### LOG

0.087, 0.059

Residual error estimates for segregated groups

2.5e+02, 2.8e+04

Pseudo time-stepping CFL-ratio:

0.23

Segregated solver iteration 32.

Velocity u, Pressure p2

| Iter | SolEst | Damping   | Stepsize | #Res | #Jac | #Sol | LinIt | LinErr | LinRes |
|------|--------|-----------|----------|------|------|------|-------|--------|--------|
| 1    | 0.17   | 0.5000000 | 0.17     | 1043 | 518  | 518  | 4075  | 0.0004 | -      |

Turbulence variables

| Iter | SolEst | ResEst  | Damping   | Stepsize | #Res  | #Jac | #Sol | LinIt | LinErr |
|------|--------|---------|-----------|----------|-------|------|------|-------|--------|
| 1    | 0.064  | 4.4e+04 | 0.3500000 |          | 0.064 | 2516 | 1473 | 1473  | 8922   |
| 2    | 0.056  | 3.5e+04 | 0.3500000 |          | 0.056 | 2517 | 1474 | 1474  | 8927   |
| 3    | 0.051  | 2.8e+04 | 0.3500000 |          | 0.051 | 2518 | 1475 | 1475  | 8932   |

Solution error estimates for segregated groups

0.085, 0.058

Residual error estimates for segregated groups

2.3e+02, 2.8e+04

Pseudo time-stepping CFL-ratio:

0.24

Segregated solver iteration 33.

Velocity u, Pressure p2

| Iter | SolEst | Damping   | Stepsize | #Res | #Jac | #Sol | LinIt | LinErr  | LinRes |
|------|--------|-----------|----------|------|------|------|-------|---------|--------|
| 1    | 0.16   | 0.5000000 | 0.16     | 1045 | 519  | 519  | 4082  | 0.00033 | -      |

Turbulence variables

| Iter | SolEst | ResEst  | Damping   | Stepsize | #Res  | #Jac | #Sol | LinIt | LinErr |
|------|--------|---------|-----------|----------|-------|------|------|-------|--------|
| 1    | 0.062  | 4.4e+04 | 0.3500000 |          | 0.062 | 2521 | 1476 | 1476  | 8940   |
| 2    | 0.055  | 3.6e+04 | 0.3500000 |          | 0.055 | 2522 | 1477 | 1477  | 8945   |
| 3    | 0.05   | 3e+04   | 0.3500000 |          | 0.05  | 2523 | 1478 | 1478  | 8950   |

Solution error estimates for segregated groups

0.082, 0.056

Residual error estimates for segregated groups

2e+02, 3e+04

Pseudo time-stepping CFL-ratio:

0.24

Segregated solver iteration 34.

Velocity u, Pressure p2

| Iter | SolEst | Damping   | Stepsize | #Res | #Jac | #Sol | LinIt | LinErr  | LinRes |
|------|--------|-----------|----------|------|------|------|-------|---------|--------|
| 1    | 0.16   | 0.5000000 | 0.16     | 1047 | 520  | 520  | 4089  | 0.00041 | -      |

Turbulence variables

| Iter | SolEst | ResEst  | Damping   | Stepsize | #Res  | #Jac | #Sol | LinIt | LinErr |
|------|--------|---------|-----------|----------|-------|------|------|-------|--------|
| 1    | 0.061  | 4.6e+04 | 0.3500000 |          | 0.061 | 2526 | 1479 | 1479  | 8958   |
| 2    | 0.054  | 3.8e+04 | 0.3500000 |          | 0.054 | 2527 | 1480 | 1480  | 8963   |
| 3    | 0.05   | 3.3e+04 | 0.3500000 |          | 0.05  | 2528 | 1481 | 1481  | 8968   |

Solution error estimates for segregated groups

0.078, 0.055

Residual error estimates for segregated groups

1.9e+02, 3.3e+04

Pseudo time-stepping CFL-ratio:

0.24

Segregated solver iteration 35.

Velocity u, Pressure p2

| Iter | SolEst | Damping   | Stepsize | #Res | #Jac | #Sol | LinIt | LinErr  | LinRes |
|------|--------|-----------|----------|------|------|------|-------|---------|--------|
| 1    | 0.15   | 0.5000000 | 0.15     | 1049 | 521  | 521  | 4096  | 0.00065 | -      |

Turbulence variables

| Iter   | SolEst | ResEst  | Damping   | Stepsize | #Res  | #Jac | #Sol | LinIt | LinErr |
|--------|--------|---------|-----------|----------|-------|------|------|-------|--------|
| LinRes |        |         |           |          |       |      |      |       |        |
| 1      | 0.06   | 4.9e+04 | 0.3500000 |          | 0.06  | 2531 | 1482 | 1482  | 8976   |
| -      |        |         |           |          |       |      |      |       |        |
| 2      | 0.054  | 4.2e+04 | 0.3500000 |          | 0.054 | 2532 | 1483 | 1483  | 8981   |
| -      |        |         |           |          |       |      |      |       |        |
| 3      | 0.05   | 3.8e+04 | 0.3500000 |          | 0.05  | 2533 | 1484 | 1484  | 8986   |
| -      |        |         |           |          |       |      |      |       |        |

Solution error estimates for segregated groups

0.075, 0.055

Residual error estimates for segregated groups

1.7e+02, 3.8e+04

Pseudo time-stepping CFL-ratio:

0.25

Segregated solver iteration 36.

Velocity u, Pressure p2

| Iter | SolEst | Damping   | Stepsize | #Res | #Jac | #Sol | LinIt | LinErr  | LinRes |
|------|--------|-----------|----------|------|------|------|-------|---------|--------|
| 1    | 0.15   | 0.5000000 | 0.15     | 1051 | 522  | 522  | 4103  | 0.00089 | -      |

Turbulence variables

| Iter   | SolEst | ResEst  | Damping   | Stepsize | #Res  | #Jac | #Sol | LinIt | LinErr |
|--------|--------|---------|-----------|----------|-------|------|------|-------|--------|
| LinRes |        |         |           |          |       |      |      |       |        |
| 1      | 0.061  | 5.4e+04 | 0.3500000 |          | 0.061 | 2536 | 1485 | 1485  | 8994   |
| -      |        |         |           |          |       |      |      |       |        |
| 2      | 0.054  | 4.9e+04 | 0.3500000 |          | 0.054 | 2537 | 1486 | 1486  | 8999   |
| -      |        |         |           |          |       |      |      |       |        |
| 3      | 0.051  | 4.5e+04 | 0.3500000 |          | 0.051 | 2538 | 1487 | 1487  | 9004   |
| -      |        |         |           |          |       |      |      |       |        |

Solution error estimates for segregated groups

0.073, 0.055

Residual error estimates for segregated groups

1.6e+02, 4.5e+04

Pseudo time-stepping CFL-ratio:

0.25

Segregated solver iteration 37.

Velocity u, Pressure p2

| Iter | SolEst | Damping   | Stepsize | #Res | #Jac | #Sol | LinIt | LinErr | LinRes |
|------|--------|-----------|----------|------|------|------|-------|--------|--------|
| 1    | 0.14   | 0.5000000 | 0.14     | 1053 | 523  | 523  | 4110  | 0.001  | -      |

Turbulence variables

| Iter   | SolEst | ResEst  | Damping   | Stepsize | #Res  | #Jac | #Sol | LinIt | LinErr |
|--------|--------|---------|-----------|----------|-------|------|------|-------|--------|
| LinRes |        |         |           |          |       |      |      |       |        |
| 1      | 0.062  | 6.2e+04 | 0.3500000 |          | 0.062 | 2541 | 1488 | 1488  | 9012   |
| -      |        |         |           |          |       |      |      |       |        |
| 2      | 0.055  | 5.7e+04 | 0.3500000 |          | 0.055 | 2542 | 1489 | 1489  | 9018   |
| -      |        |         |           |          |       |      |      |       |        |

```

3      0.051      5.4e+04      0.3500000      0.051 2543 1490 1490 9024 0.00056
-
Solution error estimates for segregated groups
0.07, 0.056
Residual error estimates for segregated groups
1.5e+02, 5.4e+04
Pseudo time-stepping CFL-ratio:
0.26
Segregated solver iteration 38.
Velocity u, Pressure p2
Iter      SolEst      Damping      Stepsize #Res #Jac #Sol LinIt      LinErr      LinRes
1          0.13      0.5000000      0.13 1055 524 524 4117 0.00094      -
Turbulence variables
Iter      SolEst      ResEst      Damping      Stepsize #Res #Jac #Sol LinIt      LinErr
LinRes
1          0.062      7e+04      0.3500000      0.062 2546 1491 1491 9032 0.00099
-
2          0.056      6.6e+04      0.3500000      0.056 2547 1492 1492 9038 0.00073
-
3          0.053      6.4e+04      0.3500000      0.053 2548 1493 1493 9044 0.00067
-
Solution error estimates for segregated groups
0.067, 0.057
Residual error estimates for segregated groups
1.4e+02, 6.4e+04
Pseudo time-stepping CFL-ratio:
0.26
Segregated solver iteration 39.
Velocity u, Pressure p2
Iter      SolEst      Damping      Stepsize #Res #Jac #Sol LinIt      LinErr      LinRes
1          0.13      0.5000000      0.13 1057 525 525 4125 0.00042      -
Turbulence variables
Iter      SolEst      ResEst      Damping      Stepsize #Res #Jac #Sol LinIt      LinErr
LinRes
1          0.063      7.8e+04      0.3500000      0.063 2551 1494 1494 9052 0.00064
-
2          0.057      7.5e+04      0.3500000      0.057 2552 1495 1495 9058 0.0007
-
3          0.054      7.4e+04      0.3500000      0.054 2553 1496 1496 9064 0.00073
-
Solution error estimates for segregated groups
0.064, 0.058
Residual error estimates for segregated groups
1.4e+02, 7.4e+04
Pseudo time-stepping CFL-ratio:
0.26
Segregated solver iteration 40.
Velocity u, Pressure p2
Iter      SolEst      Damping      Stepsize #Res #Jac #Sol LinIt      LinErr      LinRes
1          0.12      0.5000000      0.12 1059 526 526 4133 0.0006      -
Turbulence variables
Iter      SolEst      ResEst      Damping      Stepsize #Res #Jac #Sol LinIt      LinErr
LinRes
1          0.064      8.5e+04      0.3500000      0.064 2556 1497 1497 9072 0.00073
-

```

|   |       |         |           |       |      |      |      |      |         |
|---|-------|---------|-----------|-------|------|------|------|------|---------|
| 2 | 0.057 | 8.3e+04 | 0.3500000 | 0.057 | 2557 | 1498 | 1498 | 9078 | 0.00082 |
| - |       |         |           |       |      |      |      |      |         |
| 3 | 0.054 | 8.4e+04 | 0.3500000 | 0.054 | 2558 | 1499 | 1499 | 9084 | 0.00082 |
| - |       |         |           |       |      |      |      |      |         |

Solution error estimates for segregated groups

0.06, 0.058

Residual error estimates for segregated groups

1.4e+02, 8.4e+04

Pseudo time-stepping CFL-ratio:

0.27

Segregated solver iteration 41.

Velocity u, Pressure p2

| Iter | SolEst | Damping   | Stepsize | #Res | #Jac | #Sol | LinIt | LinErr  | LinRes |
|------|--------|-----------|----------|------|------|------|-------|---------|--------|
| 1    | 0.12   | 0.5000000 | 0.12     | 1061 | 527  | 527  | 4141  | 0.00083 | -      |

Turbulence variables

| Iter   | SolEst | ResEst  | Damping   | Stepsize | #Res | #Jac | #Sol | LinIt | LinErr  |
|--------|--------|---------|-----------|----------|------|------|------|-------|---------|
| LinRes |        |         |           |          |      |      |      |       |         |
| 1      | 0.063  | 9.1e+04 | 0.3500000 | 0.063    | 2561 | 1500 | 1500 | 9092  | 0.00082 |
| -      |        |         |           |          |      |      |      |       |         |
| 2      | 0.057  | 9e+04   | 0.3500000 | 0.057    | 2562 | 1501 | 1501 | 9098  | 0.00089 |
| -      |        |         |           |          |      |      |      |       |         |
| 3      | 0.054  | 9.1e+04 | 0.3500000 | 0.054    | 2563 | 1502 | 1502 | 9104  | 0.00097 |
| -      |        |         |           |          |      |      |      |       |         |

Solution error estimates for segregated groups

0.058, 0.058

Residual error estimates for segregated groups

1.4e+02, 9.1e+04

Pseudo time-stepping CFL-ratio:

0.27

Segregated solver iteration 42.

Velocity u, Pressure p2

| Iter | SolEst | Damping   | Stepsize | #Res | #Jac | #Sol | LinIt | LinErr  | LinRes |
|------|--------|-----------|----------|------|------|------|-------|---------|--------|
| 1    | 0.11   | 0.5000000 | 0.11     | 1063 | 528  | 528  | 4150  | 0.00052 | -      |

Turbulence variables

| Iter   | SolEst | ResEst  | Damping   | Stepsize | #Res | #Jac | #Sol | LinIt | LinErr  |
|--------|--------|---------|-----------|----------|------|------|------|-------|---------|
| LinRes |        |         |           |          |      |      |      |       |         |
| 1      | 0.062  | 9.5e+04 | 0.3500000 | 0.062    | 2566 | 1503 | 1503 | 9112  | 0.00085 |
| -      |        |         |           |          |      |      |      |       |         |
| 2      | 0.056  | 9.4e+04 | 0.3500000 | 0.056    | 2567 | 1504 | 1504 | 9119  | 0.00061 |
| -      |        |         |           |          |      |      |      |       |         |
| 3      | 0.054  | 9.5e+04 | 0.3500000 | 0.054    | 2568 | 1505 | 1505 | 9126  | 0.00055 |
| -      |        |         |           |          |      |      |      |       |         |

Solution error estimates for segregated groups

0.056, 0.057

Residual error estimates for segregated groups

1.5e+02, 9.5e+04

Pseudo time-stepping CFL-ratio:

0.28

Segregated solver iteration 43.

Velocity u, Pressure p2

| Iter | SolEst | Damping   | Stepsize | #Res | #Jac | #Sol | LinIt | LinErr  | LinRes |
|------|--------|-----------|----------|------|------|------|-------|---------|--------|
| 1    | 0.11   | 0.5000000 | 0.11     | 1065 | 529  | 529  | 4159  | 0.00072 | -      |

Turbulence variables

| Iter   | SolEst | ResEst | Damping | Stepsize | #Res | #Jac | #Sol | LinIt | LinErr |
|--------|--------|--------|---------|----------|------|------|------|-------|--------|
| LinRes |        |        |         |          |      |      |      |       |        |

|   |       |         |           |       |      |      |      |      |         |
|---|-------|---------|-----------|-------|------|------|------|------|---------|
| 1 | 0.06  | 9.6e+04 | 0.3500000 | 0.06  | 2571 | 1506 | 1506 | 9134 | 0.0009  |
| - |       |         |           |       |      |      |      |      |         |
| 2 | 0.055 | 9.5e+04 | 0.3500000 | 0.055 | 2572 | 1507 | 1507 | 9141 | 0.00057 |
| - |       |         |           |       |      |      |      |      |         |
| 3 | 0.053 | 9.7e+04 | 0.3500000 | 0.053 | 2573 | 1508 | 1508 | 9147 | 0.001   |
| - |       |         |           |       |      |      |      |      |         |

Solution error estimates for segregated groups

0.053, 0.056

Residual error estimates for segregated groups

1.7e+02, 9.7e+04

Pseudo time-stepping CFL-ratio:

0.28

Segregated solver iteration 44.

Velocity u, Pressure p2

| Iter | SolEst | Damping   | Stepsize | #Res | #Jac | #Sol | LinIt | LinErr  | LinRes |
|------|--------|-----------|----------|------|------|------|-------|---------|--------|
| 1    | 0.094  | 0.5000000 | 0.094    | 1067 | 530  | 530  | 4168  | 0.00095 | -      |

Turbulence variables

| Iter | SolEst | ResEst  | Damping   | Stepsize | #Res | #Jac | #Sol | LinIt | LinErr  | LinRes |
|------|--------|---------|-----------|----------|------|------|------|-------|---------|--------|
| 1    | 0.058  | 9.4e+04 | 0.3500000 | 0.058    | 2576 | 1509 | 1509 | 9155  | 0.00092 | -      |
| -    |        |         |           |          |      |      |      |       |         |        |
| 2    | 0.053  | 9.4e+04 | 0.3500000 | 0.053    | 2577 | 1510 | 1510 | 9162  | 0.00058 | -      |
| -    |        |         |           |          |      |      |      |       |         |        |
| 3    | 0.051  | 9.4e+04 | 0.3500000 | 0.051    | 2578 | 1511 | 1511 | 9168  | 0.00098 | -      |
| -    |        |         |           |          |      |      |      |       |         |        |

Solution error estimates for segregated groups

0.047, 0.054

Residual error estimates for segregated groups

1.7e+02, 9.4e+04

Pseudo time-stepping CFL-ratio:

0.29

Segregated solver iteration 45.

Velocity u, Pressure p2

| Iter | SolEst | Damping   | Stepsize | #Res | #Jac | #Sol | LinIt | LinErr  | LinRes |
|------|--------|-----------|----------|------|------|------|-------|---------|--------|
| 1    | 0.085  | 0.5000000 | 0.085    | 1069 | 531  | 531  | 4178  | 0.00073 | -      |

Turbulence variables

| Iter | SolEst | ResEst  | Damping   | Stepsize | #Res | #Jac | #Sol | LinIt | LinErr  | LinRes |
|------|--------|---------|-----------|----------|------|------|------|-------|---------|--------|
| 1    | 0.056  | 9.1e+04 | 0.3500000 | 0.056    | 2581 | 1512 | 1512 | 9176  | 0.00094 | -      |
| -    |        |         |           |          |      |      |      |       |         |        |
| 2    | 0.052  | 9e+04   | 0.3500000 | 0.052    | 2582 | 1513 | 1513 | 9183  | 0.0006  | -      |
| -    |        |         |           |          |      |      |      |       |         |        |
| 3    | 0.05   | 9e+04   | 0.3500000 | 0.05     | 2583 | 1514 | 1514 | 9189  | 0.00099 | -      |
| -    |        |         |           |          |      |      |      |       |         |        |

Solution error estimates for segregated groups

0.042, 0.053

Residual error estimates for segregated groups

1.8e+02, 9e+04

Pseudo time-stepping CFL-ratio:

0.3

Segregated solver iteration 46.

Velocity u, Pressure p2

| Iter | SolEst | Damping   | Stepsize | #Res | #Jac | #Sol | LinIt | LinErr  | LinRes |
|------|--------|-----------|----------|------|------|------|-------|---------|--------|
| 1    | 0.078  | 0.5000000 | 0.078    | 1071 | 532  | 532  | 4188  | 0.00078 | -      |

Turbulence variables

| Iter   | SolEst | ResEst  | Damping   | Stepsize | #Res | #Jac | #Sol | LinIt | LinErr  |
|--------|--------|---------|-----------|----------|------|------|------|-------|---------|
| LinRes |        |         |           |          |      |      |      |       |         |
| 1      | 0.053  | 8.6e+04 | 0.3500000 | 0.053    | 2586 | 1515 | 1515 | 9198  | 0.00058 |
| -      |        |         |           |          |      |      |      |       |         |
| 2      | 0.049  | 8.5e+04 | 0.3500000 | 0.049    | 2587 | 1516 | 1516 | 9205  | 0.00061 |
| -      |        |         |           |          |      |      |      |       |         |
| 3      | 0.047  | 8.4e+04 | 0.3500000 | 0.047    | 2588 | 1517 | 1517 | 9212  | 0.00058 |
| -      |        |         |           |          |      |      |      |       |         |

Solution error estimates for segregated groups

0.039, 0.05

Residual error estimates for segregated groups

1.6e+02, 8.4e+04

Pseudo time-stepping CFL-ratio:

0.31

Segregated solver iteration 47.

Velocity u, Pressure p2

| Iter | SolEst | Damping   | Stepsize | #Res | #Jac | #Sol | LinIt | LinErr  | LinRes |
|------|--------|-----------|----------|------|------|------|-------|---------|--------|
| 1    | 0.074  | 0.5000000 | 0.074    | 1073 | 533  | 533  | 4198  | 0.00085 | -      |

Turbulence variables

| Iter   | SolEst | ResEst  | Damping   | Stepsize | #Res | #Jac | #Sol | LinIt | LinErr  |
|--------|--------|---------|-----------|----------|------|------|------|-------|---------|
| LinRes |        |         |           |          |      |      |      |       |         |
| 1      | 0.049  | 7.9e+04 | 0.3500000 | 0.049    | 2591 | 1518 | 1518 | 9221  | 0.00062 |
| -      |        |         |           |          |      |      |      |       |         |
| 2      | 0.045  | 7.7e+04 | 0.3500000 | 0.045    | 2592 | 1519 | 1519 | 9228  | 0.00064 |
| -      |        |         |           |          |      |      |      |       |         |
| 3      | 0.043  | 7.6e+04 | 0.3500000 | 0.043    | 2593 | 1520 | 1520 | 9235  | 0.00061 |
| -      |        |         |           |          |      |      |      |       |         |

Solution error estimates for segregated groups

0.037, 0.046

Residual error estimates for segregated groups

1.4e+02, 7.6e+04

Pseudo time-stepping CFL-ratio:

0.32

Segregated solver iteration 48.

Velocity u, Pressure p2

| Iter | SolEst | Damping   | Stepsize | #Res | #Jac | #Sol | LinIt | LinErr  | LinRes |
|------|--------|-----------|----------|------|------|------|-------|---------|--------|
| 1    | 0.07   | 0.5000000 | 0.07     | 1075 | 534  | 534  | 4208  | 0.00099 | -      |

Turbulence variables

| Iter   | SolEst | ResEst  | Damping   | Stepsize | #Res | #Jac | #Sol | LinIt | LinErr  |
|--------|--------|---------|-----------|----------|------|------|------|-------|---------|
| LinRes |        |         |           |          |      |      |      |       |         |
| 1      | 0.044  | 7.1e+04 | 0.3500000 | 0.044    | 2596 | 1521 | 1521 | 9244  | 0.00065 |
| -      |        |         |           |          |      |      |      |       |         |
| 2      | 0.04   | 6.8e+04 | 0.3500000 | 0.04     | 2597 | 1522 | 1522 | 9251  | 0.00066 |
| -      |        |         |           |          |      |      |      |       |         |
| 3      | 0.038  | 6.6e+04 | 0.3500000 | 0.038    | 2598 | 1523 | 1523 | 9258  | 0.00063 |
| -      |        |         |           |          |      |      |      |       |         |

Solution error estimates for segregated groups

0.035, 0.042

Residual error estimates for segregated groups

1.3e+02, 6.6e+04

Pseudo time-stepping CFL-ratio:

0.32

Segregated solver iteration 49.

Velocity u, Pressure p2

| Iter | SolEst | Damping   | Stepsize | #Res | #Jac | #Sol | LinIt | LinErr  | LinRes |
|------|--------|-----------|----------|------|------|------|-------|---------|--------|
| 1    | 0.065  | 0.5000000 | 0.065    | 1077 | 535  | 535  | 4219  | 0.00064 | -      |



Turbulence variables

| Iter   | SolEst | ResEst  | Damping   | Stepsize | #Res | #Jac | #Sol | LinIt | LinErr  |
|--------|--------|---------|-----------|----------|------|------|------|-------|---------|
| LinRes |        |         |           |          |      |      |      |       |         |
| 1      | 0.038  | 6.1e+04 | 0.3500000 | 0.038    | 2601 | 1524 | 1524 | 9267  | 0.00065 |
| -      |        |         |           |          |      |      |      |       |         |
| 2      | 0.035  | 5.8e+04 | 0.3500000 | 0.035    | 2602 | 1525 | 1525 | 9274  | 0.00067 |
| -      |        |         |           |          |      |      |      |       |         |
| 3      | 0.033  | 5.6e+04 | 0.3500000 | 0.033    | 2603 | 1526 | 1526 | 9281  | 0.00065 |
| -      |        |         |           |          |      |      |      |       |         |

Solution error estimates for segregated groups

0.032, 0.036

Residual error estimates for segregated groups

1.1e+02, 5.6e+04

Pseudo time-stepping CFL-ratio:

0.34

Segregated solver iteration 50.

Velocity u, Pressure p2

| Iter | SolEst | Damping   | Stepsize | #Res | #Jac | #Sol | LinIt | LinErr | LinRes |
|------|--------|-----------|----------|------|------|------|-------|--------|--------|
| 1    | 0.06   | 0.5000000 | 0.06     | 1079 | 536  | 536  | 4230  | 0.0007 | -      |

Turbulence variables

| Iter   | SolEst | ResEst  | Damping   | Stepsize | #Res | #Jac | #Sol | LinIt | LinErr  |
|--------|--------|---------|-----------|----------|------|------|------|-------|---------|
| LinRes |        |         |           |          |      |      |      |       |         |
| 1      | 0.032  | 5.1e+04 | 0.3500000 | 0.032    | 2606 | 1527 | 1527 | 9290  | 0.00061 |
| -      |        |         |           |          |      |      |      |       |         |
| 2      | 0.029  | 4.8e+04 | 0.3500000 | 0.029    | 2607 | 1528 | 1528 | 9297  | 0.00067 |
| -      |        |         |           |          |      |      |      |       |         |
| 3      | 0.027  | 4.5e+04 | 0.3500000 | 0.027    | 2608 | 1529 | 1529 | 9304  | 0.00065 |
| -      |        |         |           |          |      |      |      |       |         |

Solution error estimates for segregated groups

0.03, 0.03

Residual error estimates for segregated groups

1e+02, 4.5e+04

Pseudo time-stepping CFL-ratio:

0.35

Segregated solver iteration 51.

Velocity u, Pressure p2

| Iter | SolEst | Damping   | Stepsize | #Res | #Jac | #Sol | LinIt | LinErr  | LinRes |
|------|--------|-----------|----------|------|------|------|-------|---------|--------|
| 1    | 0.058  | 0.5000000 | 0.058    | 1081 | 537  | 537  | 4241  | 0.00085 | -      |

Turbulence variables

| Iter   | SolEst | ResEst  | Damping   | Stepsize | #Res | #Jac | #Sol | LinIt | LinErr  |
|--------|--------|---------|-----------|----------|------|------|------|-------|---------|
| LinRes |        |         |           |          |      |      |      |       |         |
| 1      | 0.027  | 4.1e+04 | 0.3500000 | 0.027    | 2611 | 1530 | 1530 | 9313  | 0.00061 |
| -      |        |         |           |          |      |      |      |       |         |
| 2      | 0.023  | 3.8e+04 | 0.3500000 | 0.023    | 2612 | 1531 | 1531 | 9320  | 0.00064 |
| -      |        |         |           |          |      |      |      |       |         |
| 3      | 0.021  | 3.5e+04 | 0.3500000 | 0.021    | 2613 | 1532 | 1532 | 9327  | 0.00061 |
| -      |        |         |           |          |      |      |      |       |         |

Solution error estimates for segregated groups

0.029, 0.024

Residual error estimates for segregated groups

89, 3.5e+04

Pseudo time-stepping CFL-ratio:

0.37

Segregated solver iteration 52.

Velocity u, Pressure p2

| Iter | SolEst | Damping | Stepsize | #Res | #Jac | #Sol | LinIt | LinErr | LinRes |
|------|--------|---------|----------|------|------|------|-------|--------|--------|
|------|--------|---------|----------|------|------|------|-------|--------|--------|

```

1      0.056  0.5000000      0.056 1083  538  538  4253  0.00071      -
Turbulence variables
Iter      SolEst      ResEst      Damping      Stepsize #Res #Jac #Sol LinIt      LinErr
LinRes
1      0.022      3.2e+04      0.3500000      0.022 2616 1533 1533  9336  0.00063
-
2      0.019      2.9e+04      0.3500000      0.019 2617 1534 1534  9342  0.00096
-
3      0.016      2.7e+04      0.3500000      0.016 2618 1535 1535  9348  0.00091
-
Solution error estimates for segregated groups
0.028, 0.02
Residual error estimates for segregated groups
86, 2.7e+04
Pseudo time-stepping CFL-ratio:
0.38
Segregated solver iteration 53.
Velocity u, Pressure p2
Iter      SolEst      Damping      Stepsize #Res #Jac #Sol LinIt      LinErr      LinRes
1      0.053  0.5000000      0.053 1085  539  539  4265  0.00087      -
Turbulence variables
Iter      SolEst      ResEst      Damping      Stepsize #Res #Jac #Sol LinIt      LinErr
LinRes
1      0.019      2.5e+04      0.3500000      0.019 2621 1536 1536  9357  0.00063
-
2      0.015      2.2e+04      0.3500000      0.015 2622 1537 1537  9363  0.00078
-
3      0.013      2e+04      0.3500000      0.013 2623 1538 1538  9369  0.00072
-
Solution error estimates for segregated groups
0.026, 0.016
Residual error estimates for segregated groups
90, 2e+04
Pseudo time-stepping CFL-ratio:
0.4
Segregated solver iteration 54.
Velocity u, Pressure p2
Iter      SolEst      Damping      Stepsize #Res #Jac #Sol LinIt      LinErr      LinRes
1      0.049  0.5000000      0.049 1087  540  540  4278  0.00067      -
Turbulence variables
Iter      SolEst      ResEst      Damping      Stepsize #Res #Jac #Sol LinIt      LinErr
LinRes
1      0.017      2e+04      0.3500000      0.017 2626 1539 1539  9377  0.00099
-
2      0.013      1.7e+04      0.3500000      0.013 2627 1540 1540  9383  0.00063
-
3      0.01      1.4e+04      0.3500000      0.01 2628 1541 1541  9389  0.00056
-
Solution error estimates for segregated groups
0.024, 0.014
Residual error estimates for segregated groups
1e+02, 1.4e+04
Pseudo time-stepping CFL-ratio:
0.41
Segregated solver iteration 55.
Velocity u, Pressure p2

```

| Iter | SolEst | Damping   | Stepsize | #Res | #Jac | #Sol | LinIt | LinErr  | LinRes |
|------|--------|-----------|----------|------|------|------|-------|---------|--------|
| 1    | 0.044  | 0.5000000 | 0.044    | 1089 | 541  | 541  | 4291  | 0.00077 | -      |

Turbulence variables

| Iter | SolEst | ResEst  | Damping   | Stepsize | #Res | #Jac | #Sol | LinIt | LinErr  |
|------|--------|---------|-----------|----------|------|------|------|-------|---------|
| 1    | 0.015  | 1.7e+04 | 0.3500000 | 0.015    | 2631 | 1542 | 1542 | 9397  | 0.00086 |
| 2    | 0.011  | 1.3e+04 | 0.3500000 | 0.011    | 2632 | 1543 | 1543 | 9402  | 0.00097 |
| 3    | 0.0089 | 1.1e+04 | 0.3500000 | 0.0089   | 2633 | 1544 | 1544 | 9407  | 0.00087 |

Solution error estimates for segregated groups  
0.022, 0.012  
Residual error estimates for segregated groups  
1.1e+02, 1.1e+04  
Pseudo time-stepping CFL-ratio:  
0.43  
Segregated solver iteration 56.  
Velocity u, Pressure p2

| Iter | SolEst | Damping   | Stepsize | #Res | #Jac | #Sol | LinIt | LinErr  | LinRes |
|------|--------|-----------|----------|------|------|------|-------|---------|--------|
| 1    | 0.038  | 0.5000000 | 0.038    | 1091 | 542  | 542  | 4304  | 0.00089 | -      |

Turbulence variables

| Iter | SolEst | ResEst  | Damping   | Stepsize | #Res | #Jac | #Sol | LinIt | LinErr  |
|------|--------|---------|-----------|----------|------|------|------|-------|---------|
| 1    | 0.013  | 1.4e+04 | 0.3500000 | 0.013    | 2636 | 1545 | 1545 | 9415  | 0.00081 |
| 2    | 0.0097 | 1.1e+04 | 0.3500000 | 0.0097   | 2637 | 1546 | 1546 | 9420  | 0.00089 |
| 3    | 0.0078 | 9e+03   | 0.3500000 | 0.0078   | 2638 | 1547 | 1547 | 9425  | 0.00079 |

Solution error estimates for segregated groups  
0.019, 0.01  
Residual error estimates for segregated groups  
95, 9e+03  
Pseudo time-stepping CFL-ratio:  
0.45  
Segregated solver iteration 57.  
Velocity u, Pressure p2

| Iter | SolEst | Damping   | Stepsize | #Res | #Jac | #Sol | LinIt | LinErr | LinRes |
|------|--------|-----------|----------|------|------|------|-------|--------|--------|
| 1    | 0.033  | 0.5000000 | 0.033    | 1093 | 543  | 543  | 4317  | 0.001  | -      |

Turbulence variables

| Iter | SolEst | ResEst  | Damping   | Stepsize | #Res | #Jac | #Sol | LinIt | LinErr  |
|------|--------|---------|-----------|----------|------|------|------|-------|---------|
| 1    | 0.011  | 1.2e+04 | 0.3500000 | 0.011    | 2641 | 1548 | 1548 | 9433  | 0.00076 |
| 2    | 0.0083 | 9.4e+03 | 0.3500000 | 0.0083   | 2642 | 1549 | 1549 | 9438  | 0.00082 |
| 3    | 0.0068 | 7.7e+03 | 0.3500000 | 0.0068   | 2643 | 1550 | 1550 | 9443  | 0.00073 |

Solution error estimates for segregated groups  
0.016, 0.0089  
Residual error estimates for segregated groups  
84, 7.7e+03  
Pseudo time-stepping CFL-ratio:  
0.47  
Segregated solver iteration 58.

Velocity u, Pressure p2

| Iter | SolEst | Damping   | Stepsize | #Res | #Jac | #Sol | LinIt | LinErr  | LinRes |
|------|--------|-----------|----------|------|------|------|-------|---------|--------|
| 1    | 0.027  | 0.5000000 | 0.027    | 1095 | 544  | 544  | 4331  | 0.00075 | -      |

Turbulence variables

| Iter | SolEst | ResEst  | Damping   | Stepsize | #Res | #Jac | #Sol | LinIt | LinErr  | LinRes |
|------|--------|---------|-----------|----------|------|------|------|-------|---------|--------|
| 1    | 0.0092 | 1e+04   | 0.3500000 | 0.0092   | 2646 | 1551 | 1551 | 9451  | 0.00068 | -      |
| 2    | 0.0069 | 8e+03   | 0.3500000 | 0.0069   | 2647 | 1552 | 1552 | 9456  | 0.00075 | -      |
| 3    | 0.0058 | 6.6e+03 | 0.3500000 | 0.0058   | 2648 | 1553 | 1553 | 9461  | 0.00068 | -      |

Solution error estimates for segregated groups

0.013, 0.0074

Residual error estimates for segregated groups

69, 6.6e+03

Pseudo time-stepping CFL-ratio:

0.49

Segregated solver iteration 59.

Velocity u, Pressure p2

| Iter | SolEst | Damping   | Stepsize | #Res | #Jac | #Sol | LinIt | LinErr  | LinRes |
|------|--------|-----------|----------|------|------|------|-------|---------|--------|
| 1    | 0.021  | 0.5000000 | 0.021    | 1097 | 545  | 545  | 4345  | 0.00084 | -      |

Turbulence variables

| Iter | SolEst | ResEst  | Damping   | Stepsize | #Res | #Jac | #Sol | LinIt | LinErr  | LinRes |
|------|--------|---------|-----------|----------|------|------|------|-------|---------|--------|
| 1    | 0.0074 | 8.4e+03 | 0.3500000 | 0.0074   | 2651 | 1554 | 1554 | 9468  | 0.00096 | -      |
| 2    | 0.0057 | 6.7e+03 | 0.3500000 | 0.0057   | 2652 | 1555 | 1555 | 9473  | 0.0007  | -      |
| 3    | 0.0048 | 5.6e+03 | 0.3500000 | 0.0048   | 2653 | 1556 | 1556 | 9478  | 0.00064 | -      |

Solution error estimates for segregated groups

0.01, 0.0061

Residual error estimates for segregated groups

55, 5.6e+03

Pseudo time-stepping CFL-ratio:

0.52

Segregated solver iteration 60.

Velocity u, Pressure p2

| Iter | SolEst | Damping   | Stepsize | #Res | #Jac | #Sol | LinIt | LinErr  | LinRes |
|------|--------|-----------|----------|------|------|------|-------|---------|--------|
| 1    | 0.016  | 0.5000000 | 0.016    | 1099 | 546  | 546  | 4359  | 0.00088 | -      |

Turbulence variables

| Iter | SolEst | ResEst  | Damping   | Stepsize | #Res | #Jac | #Sol | LinIt | LinErr  | LinRes |
|------|--------|---------|-----------|----------|------|------|------|-------|---------|--------|
| 1    | 0.0059 | 6.8e+03 | 0.3500000 | 0.0059   | 2656 | 1557 | 1557 | 9485  | 0.00075 | -      |
| 2    | 0.0046 | 5.5e+03 | 0.3500000 | 0.0046   | 2657 | 1558 | 1558 | 9490  | 0.00065 | -      |
| 3    | 0.0041 | 4.7e+03 | 0.3500000 | 0.0041   | 2658 | 1559 | 1559 | 9495  | 0.0006  | -      |

Solution error estimates for segregated groups

0.008, 0.0049

Residual error estimates for segregated groups

43, 4.7e+03

Pseudo time-stepping CFL-ratio:

0.55

Segregated solver iteration 61.

Velocity u, Pressure p2

| Iter | SolEst | Damping   | Stepsize | #Res | #Jac | #Sol | LinIt | LinErr  | LinRes |
|------|--------|-----------|----------|------|------|------|-------|---------|--------|
| 1    | 0.012  | 0.5000000 | 0.012    | 1101 | 547  | 547  | 4373  | 0.00086 | -      |

Turbulence variables

| Iter | SolEst | ResEst  | Damping   | Stepsize | #Res | #Jac | #Sol | LinIt | LinErr  |
|------|--------|---------|-----------|----------|------|------|------|-------|---------|
| 1    | 0.0047 | 5.5e+03 | 0.3500000 | 0.0047   | 2661 | 1560 | 1560 | 9501  | 0.00098 |
| -    |        |         |           |          |      |      |      |       |         |
| 2    | 0.0037 | 4.5e+03 | 0.3500000 | 0.0037   | 2662 | 1561 | 1561 | 9506  | 0.00059 |
| -    |        |         |           |          |      |      |      |       |         |
| 3    | 0.0033 | 4e+03   | 0.3500000 | 0.0033   | 2663 | 1562 | 1562 | 9511  | 0.00054 |
| -    |        |         |           |          |      |      |      |       |         |

Solution error estimates for segregated groups

0.0061, 0.0039

Residual error estimates for segregated groups

33, 4e+03

Pseudo time-stepping CFL-ratio:

0.58

Segregated solver iteration 62.

Velocity u, Pressure p2

| Iter | SolEst | Damping   | Stepsize | #Res | #Jac | #Sol | LinIt | LinErr  | LinRes |
|------|--------|-----------|----------|------|------|------|-------|---------|--------|
| 1    | 0.0091 | 0.5000000 | 0.0091   | 1103 | 548  | 548  | 4387  | 0.00077 | -      |

Turbulence variables

| Iter | SolEst | ResEst  | Damping   | Stepsize | #Res | #Jac | #Sol | LinIt | LinErr  |
|------|--------|---------|-----------|----------|------|------|------|-------|---------|
| 1    | 0.0037 | 4.3e+03 | 0.3500000 | 0.0037   | 2666 | 1563 | 1563 | 9517  | 0.0008  |
| -    |        |         |           |          |      |      |      |       |         |
| 2    | 0.0029 | 3.7e+03 | 0.3500000 | 0.0029   | 2667 | 1564 | 1564 | 9522  | 0.00051 |
| -    |        |         |           |          |      |      |      |       |         |
| 3    | 0.0027 | 3.2e+03 | 0.3500000 | 0.0027   | 2668 | 1565 | 1565 | 9526  | 0.00096 |
| -    |        |         |           |          |      |      |      |       |         |

Solution error estimates for segregated groups

0.0046, 0.0031

Residual error estimates for segregated groups

25, 3.2e+03

Pseudo time-stepping CFL-ratio:

0.61

Segregated solver iteration 63.

Velocity u, Pressure p2

| Iter | SolEst | Damping   | Stepsize | #Res | #Jac | #Sol | LinIt | LinErr  | LinRes |
|------|--------|-----------|----------|------|------|------|-------|---------|--------|
| 1    | 0.0067 | 0.5000000 | 0.0067   | 1105 | 549  | 549  | 4400  | 0.00095 | -      |

Turbulence variables

| Iter | SolEst | ResEst  | Damping   | Stepsize | #Res | #Jac | #Sol | LinIt | LinErr  |
|------|--------|---------|-----------|----------|------|------|------|-------|---------|
| 1    | 0.0028 | 3.4e+03 | 0.3500000 | 0.0028   | 2671 | 1566 | 1566 | 9532  | 0.00065 |
| -    |        |         |           |          |      |      |      |       |         |
| 2    | 0.0023 | 2.9e+03 | 0.3500000 | 0.0023   | 2672 | 1567 | 1567 | 9536  | 0.00086 |
| -    |        |         |           |          |      |      |      |       |         |
| 3    | 0.002  | 2.6e+03 | 0.3500000 | 0.002    | 2673 | 1568 | 1568 | 9540  | 0.00077 |
| -    |        |         |           |          |      |      |      |       |         |

Solution error estimates for segregated groups

0.0033, 0.0024

Residual error estimates for segregated groups

19, 2.6e+03

Pseudo time-stepping CFL-ratio:

0.65

Segregated solver iteration 64.

Velocity u, Pressure p2

| Iter | SolEst | Damping   | Stepsize | #Res | #Jac | #Sol | LinIt | LinErr  | LinRes |
|------|--------|-----------|----------|------|------|------|-------|---------|--------|
| 1    | 0.0048 | 0.5000000 | 0.0048   | 1107 | 550  | 550  | 4413  | 0.00073 | -      |

Turbulence variables

| Iter   | SolEst | ResEst  | Damping   | Stepsize | #Res | #Jac | #Sol | LinIt | LinErr  |
|--------|--------|---------|-----------|----------|------|------|------|-------|---------|
| LinRes |        |         |           |          |      |      |      |       |         |
| 1      | 0.002  | 2.7e+03 | 0.3500000 | 0.002    | 2676 | 1569 | 1569 | 9545  | 0.00096 |
| -      |        |         |           |          |      |      |      |       |         |
| 2      | 0.0017 | 2.3e+03 | 0.3500000 | 0.0017   | 2677 | 1570 | 1570 | 9549  | 0.00067 |
| -      |        |         |           |          |      |      |      |       |         |
| 3      | 0.0015 | 2e+03   | 0.3500000 | 0.0015   | 2678 | 1571 | 1571 | 9553  | 0.00061 |
| -      |        |         |           |          |      |      |      |       |         |

Solution error estimates for segregated groups

0.0024, 0.0018

Residual error estimates for segregated groups

14, 2e+03

Pseudo time-stepping CFL-ratio:

0.69

Segregated solver iteration 65.

Velocity u, Pressure p2

| Iter | SolEst | Damping   | Stepsize | #Res | #Jac | #Sol | LinIt | LinErr  | LinRes |
|------|--------|-----------|----------|------|------|------|-------|---------|--------|
| 1    | 0.0033 | 0.5000000 | 0.0033   | 1109 | 551  | 551  | 4424  | 0.00099 | -      |

Turbulence variables

| Iter   | SolEst | ResEst  | Damping   | Stepsize | #Res | #Jac | #Sol | LinIt | LinErr  |
|--------|--------|---------|-----------|----------|------|------|------|-------|---------|
| LinRes |        |         |           |          |      |      |      |       |         |
| 1      | 0.0015 | 2e+03   | 0.3500000 | 0.0015   | 2681 | 1572 | 1572 | 9558  | 0.00074 |
| -      |        |         |           |          |      |      |      |       |         |
| 2      | 0.0012 | 1.8e+03 | 0.3500000 | 0.0012   | 2682 | 1573 | 1573 | 9561  | 0.00097 |
| -      |        |         |           |          |      |      |      |       |         |
| 3      | 0.0011 | 1.6e+03 | 0.3500000 | 0.0011   | 2683 | 1574 | 1574 | 9564  | 0.00092 |
| -      |        |         |           |          |      |      |      |       |         |

Solution error estimates for segregated groups

0.0016, 0.0013

Residual error estimates for segregated groups

12, 1.6e+03

Pseudo time-stepping CFL-ratio:

0.73

Segregated solver iteration 66.

Velocity u, Pressure p2

| Iter | SolEst | Damping   | Stepsize | #Res | #Jac | #Sol | LinIt | LinErr  | LinRes |
|------|--------|-----------|----------|------|------|------|-------|---------|--------|
| 1    | 0.0023 | 0.5000000 | 0.0023   | 1111 | 552  | 552  | 4434  | 0.00091 | -      |

Turbulence variables

| Iter   | SolEst  | ResEst  | Damping   | Stepsize | #Res | #Jac | #Sol | LinIt | LinErr  |
|--------|---------|---------|-----------|----------|------|------|------|-------|---------|
| LinRes |         |         |           |          |      |      |      |       |         |
| 1      | 0.001   | 1.6e+03 | 0.3500000 | 0.001    | 2686 | 1575 | 1575 | 9569  | 0.00055 |
| -      |         |         |           |          |      |      |      |       |         |
| 2      | 0.00089 | 1.4e+03 | 0.3500000 | 0.00089  | 2687 | 1576 | 1576 | 9572  | 0.00073 |
| -      |         |         |           |          |      |      |      |       |         |

Solution error estimates for segregated groups

0.0011, 0.00068

Residual error estimates for segregated groups

9.1, 1.4e+03

Pseudo time-stepping CFL-ratio:

0.78

Segregated solver iteration 67.

Velocity u, Pressure p2

| Iter | SolEst | Damping   | Stepsize | #Res | #Jac | #Sol | LinIt | LinErr  | LinRes |
|------|--------|-----------|----------|------|------|------|-------|---------|--------|
| 1    | 0.0014 | 0.5000000 | 0.0014   | 1113 | 553  | 553  | 4442  | 0.00098 | -      |

Turbulence variables

| Iter | SolEst  | ResEst  | Damping   | Stepsize | #Res | #Jac | #Sol | LinIt | LinErr |
|------|---------|---------|-----------|----------|------|------|------|-------|--------|
| 1    | 0.00086 | 1.3e+03 | 0.3500000 | 0.00086  | 2690 | 1577 | 1577 | 9576  | 0.0009 |
| -    |         |         |           |          |      |      |      |       |        |

Solution error estimates for segregated groups

0.00071, 0.00056

Residual error estimates for segregated groups

6.8, 1.3e+03

Pseudo time-stepping CFL-ratio:

0.84

Segregated solver iteration 68.

Velocity u, Pressure p2

| Iter | SolEst  | Damping   | Stepsize | #Res | #Jac | #Sol | LinIt | LinErr  | LinRes |
|------|---------|-----------|----------|------|------|------|-------|---------|--------|
| 1    | 0.00094 | 0.5000000 | 0.00094  | 1115 | 554  | 554  | 4449  | 0.00084 | -      |

Turbulence variables

| Iter | SolEst | ResEst  | Damping   | Stepsize | #Res | #Jac | #Sol | LinIt | LinErr  |
|------|--------|---------|-----------|----------|------|------|------|-------|---------|
| 1    | 0.0008 | 1.3e+03 | 0.3500000 | 0.0008   | 2693 | 1578 | 1578 | 9580  | 0.00081 |
| -    |        |         |           |          |      |      |      |       |         |

Solution error estimates for segregated groups

0.00047, 0.00052

Residual error estimates for segregated groups

5.2, 1.3e+03

Pseudo time-stepping CFL-ratio:

0.89

Segregated solver iteration 69.

Velocity u, Pressure p2

| Iter | SolEst  | Damping   | Stepsize | #Res | #Jac | #Sol | LinIt | LinErr  | LinRes |
|------|---------|-----------|----------|------|------|------|-------|---------|--------|
| 1    | 0.00061 | 0.5000000 | 0.00061  | 1117 | 555  | 555  | 4455  | 0.00083 | -      |

Turbulence variables

| Iter | SolEst  | ResEst  | Damping   | Stepsize | #Res | #Jac | #Sol | LinIt | LinErr  |
|------|---------|---------|-----------|----------|------|------|------|-------|---------|
| 1    | 0.00072 | 1.2e+03 | 0.3500000 | 0.00072  | 2696 | 1579 | 1579 | 9584  | 0.00073 |
| -    |         |         |           |          |      |      |      |       |         |

Solution error estimates for segregated groups

0.0003, 0.00047

Residual error estimates for segregated groups

3.9, 1.2e+03

Pseudo time-stepping CFL-ratio:

0.94

Segregated solver iteration 70.

Velocity u, Pressure p2

| Iter | SolEst  | Damping   | Stepsize | #Res | #Jac | #Sol | LinIt | LinErr  | LinRes |
|------|---------|-----------|----------|------|------|------|-------|---------|--------|
| 1    | 0.00041 | 0.5000000 | 0.00041  | 1119 | 556  | 556  | 4460  | 0.00079 | -      |

Turbulence variables

| Iter | SolEst  | ResEst  | Damping   | Stepsize | #Res | #Jac | #Sol | LinIt | LinErr  |
|------|---------|---------|-----------|----------|------|------|------|-------|---------|
| 1    | 0.00065 | 1.1e+03 | 0.3500000 | 0.00065  | 2699 | 1580 | 1580 | 9588  | 0.00067 |
| -    |         |         |           |          |      |      |      |       |         |

Solution error estimates for segregated groups

0.00021, 0.00042

```

Residual error estimates for segregated groups
3, 1.1e+03
Pseudo time-stepping CFL-ratio:
0.99
Segregated solver iteration 71.
Velocity u, Pressure p2
Iter      SolEst      Damping      Stepsize #Res #Jac #Sol LinIt   LinErr   LinRes
  1      0.00029    0.5000000    0.00029 1121  557  557  4464  0.00085      -
Turbulence variables
Iter      SolEst      ResEst      Damping      Stepsize #Res #Jac #Sol LinIt   LinErr
LinRes
  1      0.00059      1e+03    0.3500000      0.00059 2702 1581 1581  9592  0.00061
-
Solution error estimates for segregated groups
0.00014, 0.00039
Residual error estimates for segregated groups
2.3, 1e+03
Pseudo time-stepping CFL-ratio:
1
Solution time: 29832 s. (8 hours, 17 minutes, 12 seconds)
Physical memory: 15.06 GB
Virtual memory: 23.06 GB
Ended at Feb 16, 2021 10:18:29 PM.
----- Stationary Solver 1 in Study 1/Solution 1 (sol1) ----->

```

## Advanced (aDef)

### ASSEMBLY SETTINGS

| Description            | Value |
|------------------------|-------|
| Reuse sparsity pattern | On    |

## Parametric 1 (p1)

### GENERAL

| Description           | Value                                            |
|-----------------------|--------------------------------------------------|
| Defined by study step | <a href="#">Parametric Sweep Geschwindigkeit</a> |
| Run continuation for  | No parameter                                     |

### PARAMETERS

| Parameter name | Parameter value list | Parameter unit |
|----------------|----------------------|----------------|
| f              | range(100,100,800)   | rpm            |

## Segregated 1 (se1)

### GENERAL

| Description                    | Value                |
|--------------------------------|----------------------|
| Maximum number of iterations   | 400                  |
| Stabilization and acceleration | Pseudo time-stepping |
| Initial CFL number             | 3                    |



#### Velocity u, Pressure p2 (ss1)

##### GENERAL

| Description   | Value                                                           |
|---------------|-----------------------------------------------------------------|
| Variables     | {Velocity field (spatial frame) (comp1.u), Pressure (comp1.p2)} |
| Linear solver | <a href="#">AMG, fluid flow variables (spf)</a>                 |

##### METHOD AND TERMINATION

| Description    | Value |
|----------------|-------|
| Damping factor | 0.5   |

#### Turbulence variables (ss2)

##### GENERAL

| Description   | Value                                                                         |
|---------------|-------------------------------------------------------------------------------|
| Variables     | {Turbulent kinetic energy (comp1.k2), Turbulent dissipation rate (comp1.ep2)} |
| Linear solver | <a href="#">AMG, turbulence variables (spf)</a>                               |

##### METHOD AND TERMINATION

| Description           | Value                   |
|-----------------------|-------------------------|
| Damping factor        | 0.35                    |
| Termination technique | Iterations or tolerance |
| Number of iterations  | 3                       |
| Tolerance factor      | 1                       |

#### Lower Limit 1 (ll1)

##### LOWER LIMIT

| Description                    | Value                  |
|--------------------------------|------------------------|
| Lower limits (field variables) | comp1.k2 0 comp1.ep2 0 |

#### AMG, fluid flow variables (spf) (i1)

##### GENERAL

| Description                  | Value |
|------------------------------|-------|
| Nonlinear-based error norm   | On    |
| Maximum number of iterations | 200   |

##### ERROR

| Description              | Value |
|--------------------------|-------|
| Factor in error estimate | 20    |

#### Multigrid 1 (mg1)

##### GENERAL

| Description                              | Value                    |
|------------------------------------------|--------------------------|
| Solver                                   | Smoothed aggregation AMG |
| Maximum number of DOFs at coarsest level | 80000                    |
| Strength of connections                  | 0.02                     |
| Construct prolongators componentwise     | On                       |
| Prolongator smoothing                    | Off                      |

#### Presmoothing (pr)

##### SCGS 1 (sc1)

###### MAIN

| Description              | Value |
|--------------------------|-------|
| Sweep type               | SSOR  |
| Number of iterations     | 0     |
| Vertex relaxation factor | 0.7   |

#### Postsmoothing (po)

##### SCGS 1 (sc1)

###### MAIN

| Description              | Value |
|--------------------------|-------|
| Sweep type               | SSOR  |
| Number of iterations     | 1     |
| Vertex relaxation factor | 0.7   |

#### Coarse Solver (cs)

##### Direct 1 (d1)

###### GENERAL

| Description           | Value   |
|-----------------------|---------|
| Solver                | PARDISO |
| Pivoting perturbation | 1.0E-13 |

#### AMG, turbulence variables (spf) (i2)

###### GENERAL

| Description                  | Value |
|------------------------------|-------|
| Nonlinear-based error norm   | On    |
| Maximum number of iterations | 200   |

###### ERROR

| Description              | Value |
|--------------------------|-------|
| Factor in error estimate | 20    |

### Multigrid 1 (mg1)

#### GENERAL

| Description                              | Value                    |
|------------------------------------------|--------------------------|
| Solver                                   | Smoothed aggregation AMG |
| Maximum number of DOFs at coarsest level | 50000                    |
| Construct prolongators componentwise     | On                       |
| Prolongator smoothing                    | Off                      |

### Presmoothing (pr)

#### SOR Line 1 (sl1)

#### MAIN

| Description          | Value     |
|----------------------|-----------|
| Sweep type           | SSOR      |
| Number of iterations | 0         |
| Relaxation factor    | 0.7       |
| Multivariable method | Uncoupled |

#### SECONDARY

| Description       | Value |
|-------------------|-------|
| Relaxation factor | 0.5   |

### Postsmoothing (po)

#### SOR Line 1 (sl1)

#### MAIN

| Description          | Value     |
|----------------------|-----------|
| Sweep type           | SSOR      |
| Number of iterations | 1         |
| Relaxation factor    | 0.7       |
| Multivariable method | Uncoupled |

#### SECONDARY

| Description       | Value |
|-------------------|-------|
| Relaxation factor | 0.5   |

### Coarse Solver (cs)

#### Direct 1 (d1)

#### GENERAL

| Description | Value   |
|-------------|---------|
| Solver      | PARDISO |

| Description           | Value   |
|-----------------------|---------|
| Pivoting perturbation | 1.0E-13 |

# 4 Results

## 4.1 DATASETS

### 4.1.1 Study 1/Solution 1 (1)

#### SOLUTION

| Description | Value                      |
|-------------|----------------------------|
| Solution    | <a href="#">Solution 1</a> |
| Component   | Save Point Geometry 1      |

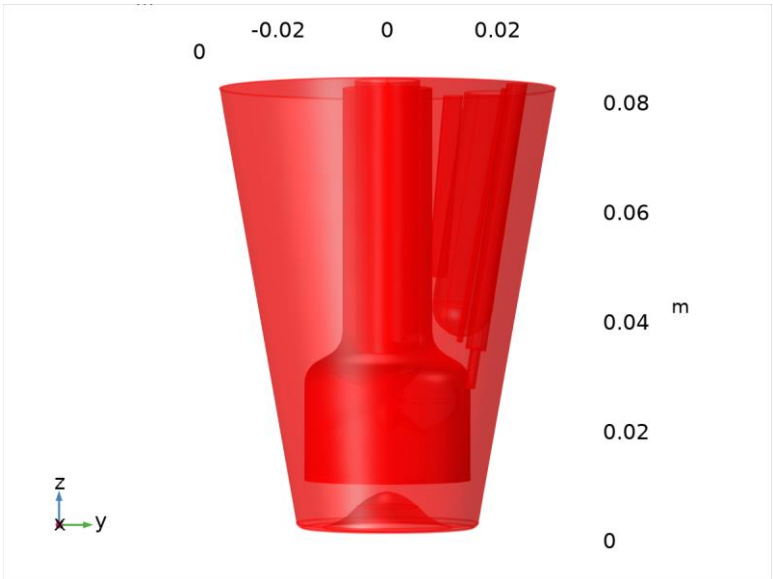

Dataset: Study 1/Solution 1 (1)

### 4.1.2 Exterior Walls

#### DATA

| Description | Value                                  |
|-------------|----------------------------------------|
| Dataset     | <a href="#">Study 1/Solution 1 (1)</a> |

#### PARAMETERIZATION

| Description   | Value              |
|---------------|--------------------|
| x- and y-axes | Surface parameters |

### 4.1.3 Cut Plane 1

#### DATA

| Description | Value                                  |
|-------------|----------------------------------------|
| Dataset     | <a href="#">Study 1/Solution 1 (1)</a> |

#### PLANE DATA

| Description  | Value |
|--------------|-------|
| Plane type   | Quick |
| x-coordinate | 0     |

#### ADVANCED

| Description      | Value                    |
|------------------|--------------------------|
| Space variables  | {cpl1x, cpl1y}           |
| Normal variables | {cpl1nx, cpl1ny, cpl1nz} |

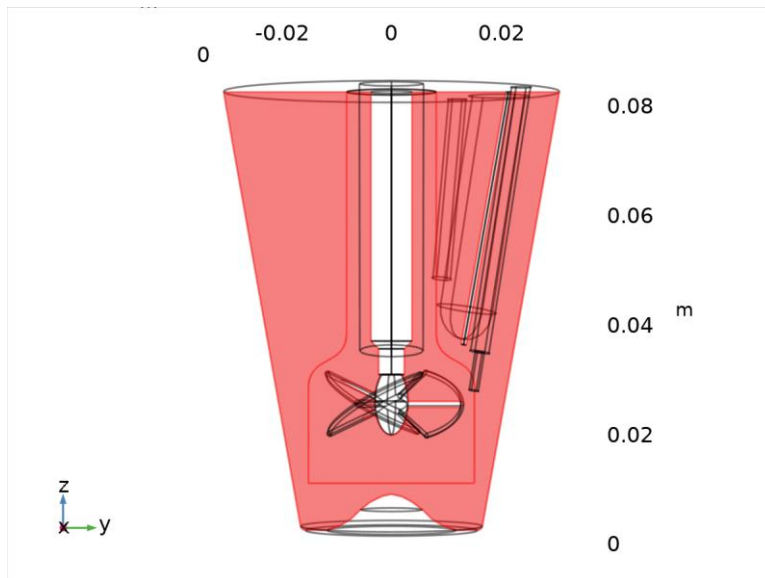

Dataset: Cut Plane 1

### 4.1.4 Mesh 1

#### MESH

| Description | Value                  |
|-------------|------------------------|
| Mesh        | <a href="#">Mesh 1</a> |

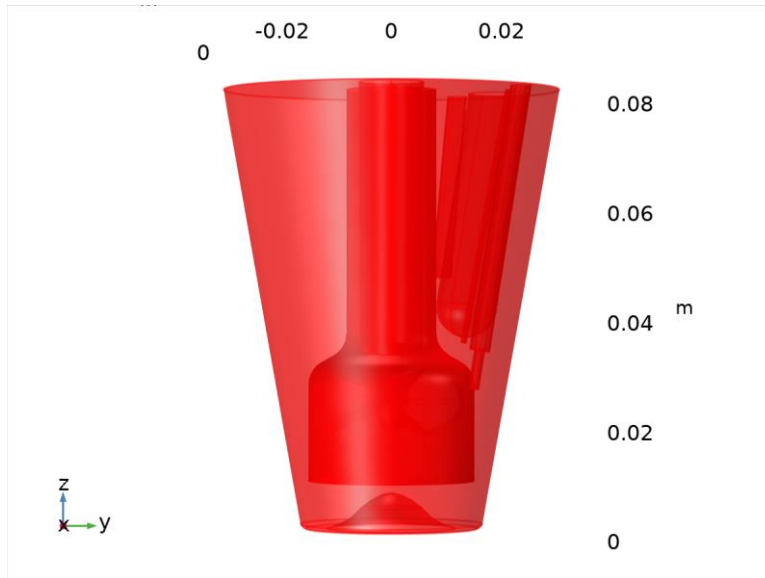

Dataset: Mesh 1

#### 4.1.5 Slice Plot

##### DATA

| Description | Value                                  |
|-------------|----------------------------------------|
| Dataset     | <a href="#">Study 1/Solution 1 (1)</a> |

##### PLANE DATA

| Description                | Value                                                                                                                                                                                                                                                                                                                                                                                                                                                                                                                                                                                                                                                                                                                                                                                                                                                                                                                                                    |
|----------------------------|----------------------------------------------------------------------------------------------------------------------------------------------------------------------------------------------------------------------------------------------------------------------------------------------------------------------------------------------------------------------------------------------------------------------------------------------------------------------------------------------------------------------------------------------------------------------------------------------------------------------------------------------------------------------------------------------------------------------------------------------------------------------------------------------------------------------------------------------------------------------------------------------------------------------------------------------------------|
| Plane type                 | Quick                                                                                                                                                                                                                                                                                                                                                                                                                                                                                                                                                                                                                                                                                                                                                                                                                                                                                                                                                    |
| Plane                      | xy - planes                                                                                                                                                                                                                                                                                                                                                                                                                                                                                                                                                                                                                                                                                                                                                                                                                                                                                                                                              |
| z-coordinate               | 0                                                                                                                                                                                                                                                                                                                                                                                                                                                                                                                                                                                                                                                                                                                                                                                                                                                                                                                                                        |
| Additional parallel planes | On                                                                                                                                                                                                                                                                                                                                                                                                                                                                                                                                                                                                                                                                                                                                                                                                                                                                                                                                                       |
| Distances                  | {0.001, 0.002, 0.003, 0.004, 0.005, 0.006, 0.007, 0.008, 0.009000000000000001, 0.010000000000000002, 0.011, 0.012, 0.013000000000000001, 0.014000000000000002, 0.015, 0.016, 0.017, 0.018000000000000002, 0.019000000000000003, 0.02, 0.021, 0.022000000000000002, 0.023, 0.024, 0.025, 0.026000000000000002, 0.027000000000000003, 0.028, 0.029, 0.030000000000000002, 0.031, 0.032, 0.033, 0.034, 0.035, 0.036000000000000004, 0.037000000000000005, 0.038, 0.039, 0.04, 0.041, 0.042, 0.043000000000000003, 0.044000000000000004, 0.045, 0.046, 0.047, 0.048, 0.049, 0.05, 0.051000000000000004, 0.052000000000000005, 0.053000000000000005, 0.054, 0.055, 0.056, 0.057, 0.058, 0.059000000000000004, 0.060000000000000005, 0.061, 0.062, 0.063, 0.064, 0.065, 0.066, 0.067, 0.068, 0.069, 0.07, 0.071000000000000001, 0.072000000000000001, 0.073000000000000001, 0.074, 0.075, 0.076, 0.077, 0.078, 0.079, 0.08, 0.081, 0.082, 0.083, 0.084, 0.085} |

#### ADVANCED

| Description      | Value                    |
|------------------|--------------------------|
| Space variables  | {cpl2x, cpl2y}           |
| Normal variables | {cpl2nx, cpl2ny, cpl2nz} |

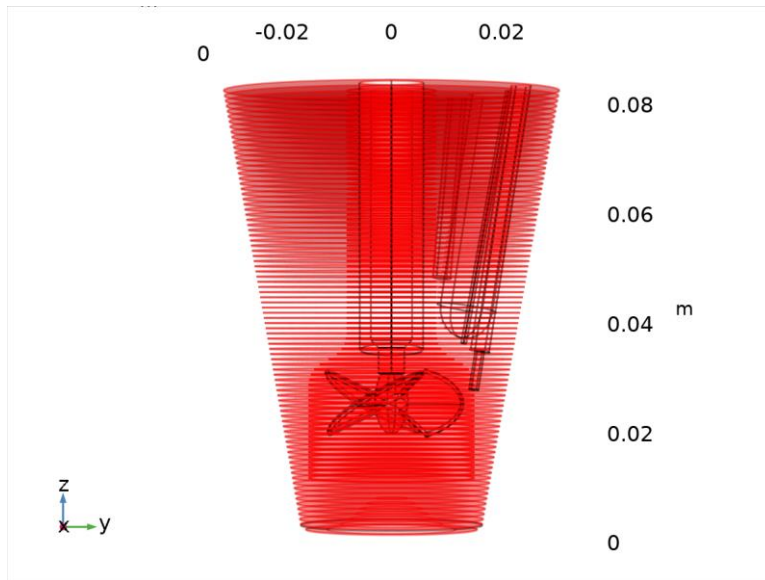

*Dataset: Slice Plot*

#### 4.1.6 Study 1/Solution 1 (2)

##### SOLUTION

| Description | Value                      |
|-------------|----------------------------|
| Solution    | <a href="#">Solution 1</a> |
| Component   | Save Point Geometry 1      |



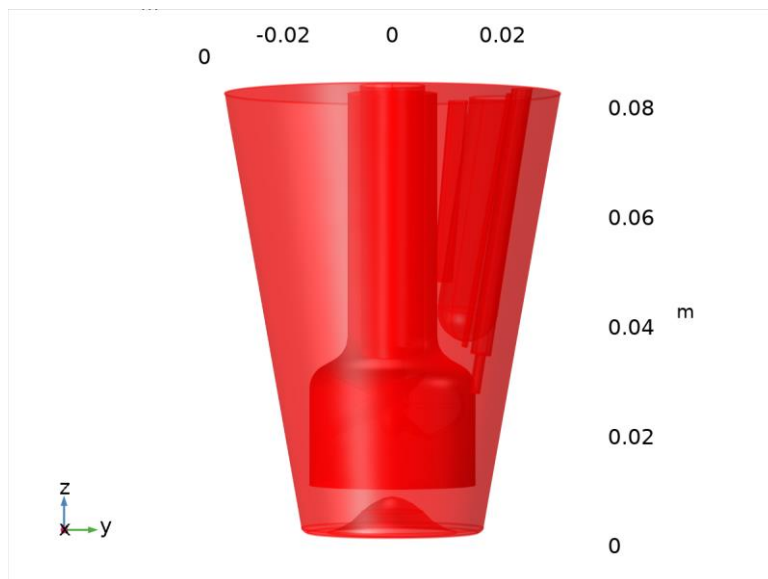

Dataset: Study 1/Solution 1 (2)

## 4.2 DERIVED VALUES

### 4.2.1 Volume Average 1

#### DATA

| Description | Value                                  |
|-------------|----------------------------------------|
| Dataset     | <a href="#">Study 1/Solution 1 (1)</a> |

#### EXPRESSIONS

| Expression | Unit             | Description         |
|------------|------------------|---------------------|
| spf.U      | m/s              | Velocity magnitude  |
| spf.sr     | 1/s              | Shear rate          |
| spf.Qvd    | W/m <sup>3</sup> | Viscous dissipation |

#### INTEGRATION SETTINGS

| Description       | Value |
|-------------------|-------|
| Integration order | 4     |

### 4.2.2 Volume Maximum 1

#### DATA

| Description | Value                                  |
|-------------|----------------------------------------|
| Dataset     | <a href="#">Study 1/Solution 1 (1)</a> |

#### EXPRESSIONS

| Expression | Unit | Description |
|------------|------|-------------|
|------------|------|-------------|

| Expression | Unit             | Description         |
|------------|------------------|---------------------|
| spf.U      | m/s              | Velocity magnitude  |
| spf.sr     | 1/s              | Shear rate          |
| spf.Qvd    | W/m <sup>3</sup> | Viscous dissipation |

4.3 PLOT GROUPS

4.3.1 Geschwindigkeit

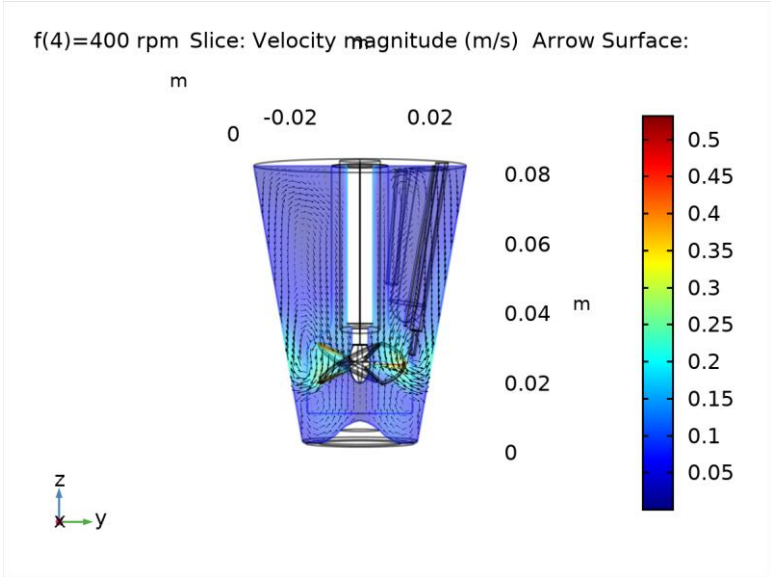

Slice: Velocity magnitude (m/s) Arrow Surface:

4.3.2 Scherrate

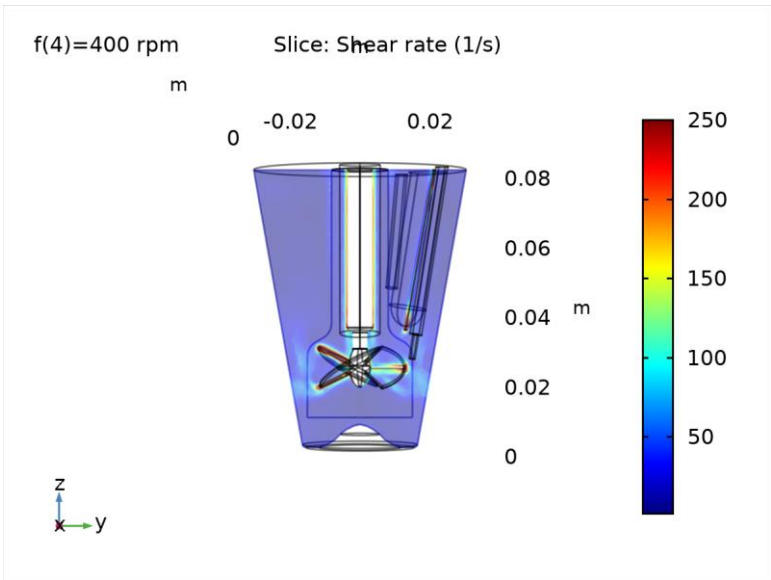

Slice: Shear rate (1/s)

### 4.3.3 Qvd

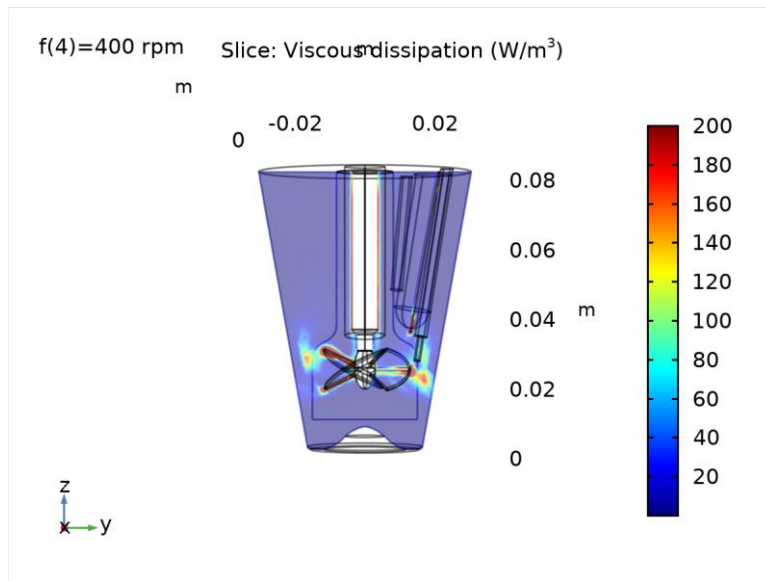

*Slice: Viscous dissipation ( $\text{W/m}^3$ )*

### 4.3.4 3D Plot Group 2

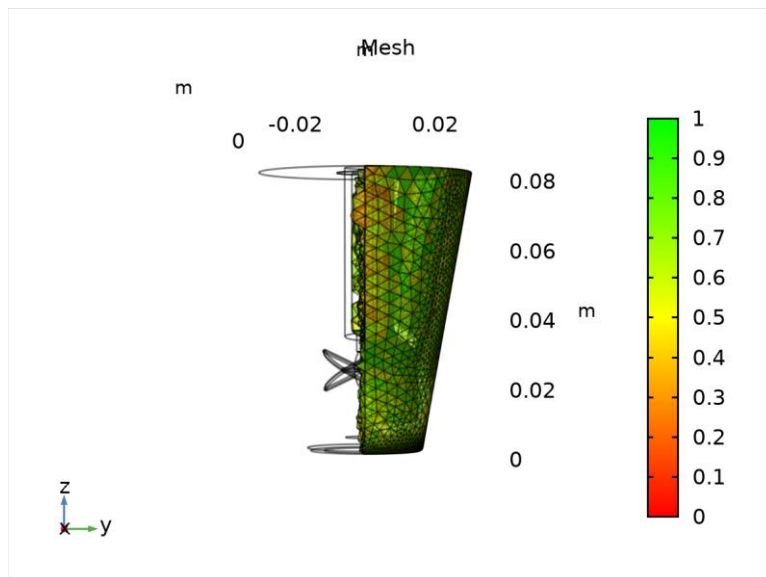

*Mesh*
